# Supplementary material for: Physiological and Transcriptomic Responses of Chinese Cabbage (Brassica rapa L. ssp. Pekinensis) to Salt Stress
Source: MDPI journal article supplement (doi:10.3390/ijms18091953), 2017-09-12

Fig. S1 Analysis the gene expression correlations between the two biological replicates in 0 mM (A) and 200 mM (B) NaCl solution treated Chinese cabbage seedlings.

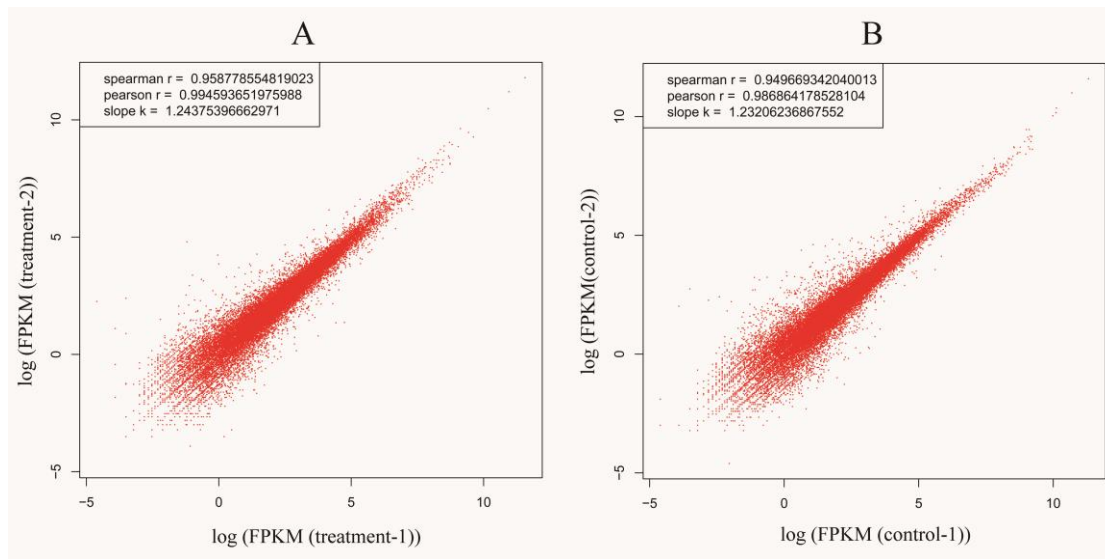

Supplement: s1 [file Fig. S1.pdf › Fig. S1.pdf]
