# Supplementary material for: Physiological and Transcriptomic Responses of Chinese Cabbage (Brassica rapa L. ssp. Pekinensis) to Salt Stress
Source: MDPI journal article supplement (doi:10.3390/ijms18091953), 2017-09-12
Supplement: s1 [file Table S2.pdf › Table S2.pdf]

Table S2 RNA-Seq experiment validation by RT-qPCR.

| Gene ID   | RT-q-PCR |              | RNA-Seq                                       |             |
|-----------|----------|--------------|-----------------------------------------------|-------------|
|           | 0 mM     | 200 mM       | log <sub>2</sub> Ratio(NaCl-200 mM/NaCl-0 mM) | Probability |
| Bra007637 | 1        | 22.24±2.38   | 4.10                                          | 0.89        |
| Bra025658 | 1        | 15.95±2.72   | 3.47                                          | 0.83        |
| Bra028707 | 1        | 3.84±0.80    | 2.19                                          | 0.82        |
| Bra018896 | 1        | 1.36±0.46    | 2.43                                          | 0.87        |
| Bra029121 | 1        | 3.35±0.52    | 10.09                                         | 0.90        |
| Bra023394 | 1        | 281.25±30.07 | 7.62                                          | 0.98        |
| Bra002594 | 1        | 17.80±0.35   | 5.21                                          | 0.94        |
| Bra015388 | 1        | 24.09±4.94   | 5.58                                          | 0.90        |
| Bra009003 | 1        | 6.64±0.99    | 2.95                                          | 0.87        |
| Bra033745 | 1        | 20.23±3.50   | 3.16                                          | 0.81        |
| Bra009105 | 1        | 17.34±4.53   | 3.56                                          | 0.83        |
| Bra017051 | 1        | 24.91±1.66   | 5.19                                          | 0.86        |
| Bra027219 | 1        | 32.80±3.51   | 12.22                                         | 0.98        |
| Bra036282 | 1        | 10.28±1.28   | 3.24                                          | 0.84        |
| Bra023777 | 1        | 1.29±0.01    | 1.27                                          | 0.81        |
| Bra013774 | 1        | 2.45±0.23    | 1.27                                          | 0.81        |
| Bra018469 | 1        | 3.82±0.60    | 1.28                                          | 0.81        |
| Bra030498 | 1        | 2.14±0.16    | 1.28                                          | 0.81        |
| Bra013911 | 1        | 2.47±0.37    | 1.28                                          | 0.80        |
| Bra007683 | 1        | 4.37±1.00    | 1.28                                          | 0.81        |
| Bra001886 | 1        | 1.99±0.48    | 1.29                                          | 0.81        |
| Bra000315 | 1        | 1.54±0.19    | 1.29                                          | 0.80        |
| Bra002216 | 1        | 2.82±0.14    | 1.30                                          | 0.82        |
| Bra029697 | 1        | 2.86±0.37    | 1.30                                          | 0.80        |
| Bra037761 | 1        | 0.30±0.10    | -1.20                                         | 0.80        |
| Bra010717 | 1        | 0.36±0.10    | -1.20                                         | 0.80        |
| Bra014473 | 1        | 0.31±0.05    | -1.22                                         | 0.80        |
| Bra025297 | 1        | 0.30±0.03    | -1.22                                         | 0.80        |
| Bra027083 | 1        | 0.14±0.01    | -1.23                                         | 0.81        |
| Bra033901 | 1        | 0.26±0.05    | -1.23                                         | 0.80        |
| Bra023597 | 1        | 0.24±0.02    | -1.24                                         | 0.80        |
| Bra028901 | 1        | 0.37±0.04    | -1.24                                         | 0.81        |
| Bra029188 | 1        | 0.26±0.03    | -1.25                                         | 0.81        |
| Bra038805 | 1        | 0.34±0.07    | -1.25                                         | 0.81        |
| Bra032734 | 1        | 0.50±0.08    | -1.26                                         | 0.81        |
| Bra035054 | 1        | 0.36±0.01    | -1.26                                         | 0.80        |
| Bra037953 | 1        | 0.46±0.11    | -1.26                                         | 0.81        |
| Bra027021 | 1        | 0.42±0.09    | -1.26                                         | 0.81        |
