# Supplementary material for: Physiological and Transcriptomic Responses of Chinese Cabbage (Brassica rapa L. ssp. Pekinensis) to Salt Stress
Source: MDPI journal article supplement (doi:10.3390/ijms18091953), 2017-09-12
Supplement: s1 [file Table S3.pdf › Table S3.pdf]

Table S3 Primers used for RT-qPCR.

| Gene ID   | Primers (5'-3')                                                      |
|-----------|----------------------------------------------------------------------|
| Bra007637 | Forward: AACATTCTCAGAGCCAACTACAA<br>Reverse: GAGCAATCCCTTGATTATCCTAA |
| Bra025658 | Forward: ATTCCTTCCCTGGTTCGTCTA<br>Reverse: GATTCTCCCATACCGGCTAAA     |
| Bra028707 | Forward: ATGGGAAGGAGGAGCACTTTGAT<br>Reverse: CTTTGTGAGGCAGTTTGGATACG |
| Bra018896 | Forward: CCACCGACACGAGCAACAAC<br>Reverse: AGGAGCCATCTCACCGACCT       |
| Bra029121 | Forward: TCAGCGACTTCGTATGTAACCG<br>Reverse: GGAGTCAACTTATCCGCCACAG   |
| Bra023394 | Forward: TCACGCTTTCTTTCTTCCTCAC<br>Reverse: CGACAAACCTAACGGACTCATC   |
| Bra002594 | Forward: TATCACTTCTGCGGCGTTTA<br>Reverse: ATCAGCCTCAAGCTCCTCCC       |
| Bra015388 | Forward: GACAGCGACGCAATTATTAAACC<br>Reverse: TCCTCTTCCACTGACCTCCAGAA |
| Bra009003 | Forward: AAGGTTCAAGTCGGTGTTACAG<br>Reverse: CCTTCGCCGTCTTCACATTCA    |
| Bra033745 | Forward: CGCAGCACTCCACAGAACACTA<br>Reverse: CACCGTCTTGGTCAAACACTTT   |
| Bra009105 | Forward: ACCCAAACCGCAATTCTGC<br>Reverse: GCTTGACTCGCCGTTCTCG         |
| Bra017051 | Forward: AGAAGCAAGGTCGTTCAAGCA<br>Reverse: CCTCAGCACCAAGTCCAAATC     |
| Bra027219 | Forward: TGAGCCAGACAGGTGAGCAAGT<br>Reverse: CAGTGGTCCGAGTAGTACCAGTAG |
| Bra036282 | Forward: GTTGCATCGTTAATGGCACATA<br>Reverse: CTTTCGTATTGACCGACCGTGT   |
| Bra023777 | Forward: GTTCACGGCGAAGGTTTCAG<br>Reverse: CAACCACCACAACACCCACA       |
| Bra013774 | Forward: ACCGTTTGGCTGATACTCCC<br>Reverse: TCGATCAAAGCCGTCTGGTA       |
| Bra018469 | Forward: ACCTCAAGAGGCAGATGACTGA<br>Reverse: AGCAGAATTGACAACGTGGAAT   |
| Bra030498 | Forward: GGTCAAGGCTGTAATGGTGGC<br>Reverse: GGTGTAGGGTAAGCGGGTTCA     |
| Bra013911 | Forward: GGCGAAGATTCTGATGATGGTT<br>Reverse: ATGGATGGATTGTATGGCACAG   |
| Bra007683 | Forward: CAATAACACCCTAATCCTCCTTT<br>Reverse: TATAACTTCCTTGGCATCTCCTC |
| Bra001886 | Forward: CAATGGTTGGATTCTGTGGCT                                       |

---

|           |                                                                         |
|-----------|-------------------------------------------------------------------------|
| Bra000315 | Reverse: TGGACTTGGACTCGGCTGTT<br>Forward: CTCAATCTTTCCCAGCCTATCAG       |
| Bra002216 | Reverse: CTAGCTTGGCAGTACCTTCCTCT<br>Forward: TGGCATTGCTGATGATATTGAGT    |
| Bra029697 | Reverse: GGCAGTGATCTTGTTCTTAGGGTT<br>Forward: AATACTCACCTCCTGACTTCTACAC |
| Bra037761 | Reverse: GTTAATGGGAACTCAAACACCTC<br>Forward: TGTATCTGCTTCCGCTAATGCT     |
| Bra010717 | Reverse: CGAACTGGACAGTAAACGCTCT<br>Forward: CCTGAAGACGAGCATGGTGA        |
| Bra014473 | Reverse: AAGGCTGGAGGGATTCTGTT<br>Forward: ATCTTGATTGGGACTGGCTCTG        |
| Bra025297 | Reverse: CCTTGTA CTATCCGTCTGCTC<br>Forward: AACATTCGCAAAGAACCGTGAG      |
| Bra027083 | Reverse: CTGAGAACCTGCCTTGAACCA<br>Forward: ATCAACGGACGGTTCGCTAT         |
| Bra033901 | Reverse: ACCAAGGAAGGGCAGTGTCT<br>Forward: AAAGGCTGATGATGTTCTCTAA        |
| Bra023597 | Reverse: AGACGGGAATATCGAACTACTG<br>Forward: ACTCCACTCCTCGTCTCCTCT       |
| Bra028901 | Reverse: CTGCTGTTCTCGCTTTGACTT<br>Forward: CCGTCTTCCCGTCGTTCACT         |
| Bra029188 | Reverse: CCCACAGCTCACCTCCACAA<br>Forward: TGATTCCTAATGCCTCTGTTCTC       |
| Bra038805 | Reverse: GCTTCATCCTCCACTATACTCCA<br>Forward: ATGTGACAGGGAAAGTGACCAAG    |
| Bra032734 | Reverse: ACTGAATAACTCCAGCACCAACG<br>Forward: TTTCGCCTCCAAGTTCACTA       |
| Bra035054 | Reverse: TCACTTCTGCCTGAGCTTTC<br>Forward: AGAACCTTGCCTCTTACACTCC        |
| Bra037953 | Reverse: GATCAAATGTTTCAACCGTCAT<br>Forward: GTTATGGCACGAGACCTGATT       |
| Bra027021 | Reverse: TTGGCAACGGTAGACTGAAGA<br>Forward: ACGCACAAGAAGCAATCAGG         |
| Actin     | Reverse: ACAAGCACGGACATCAACCA<br>Forward: GCTTACGTCGCTCTTGA CTACG       |

---
