# Supplementary material for: Physiological and Transcriptomic Responses of Chinese Cabbage (Brassica rapa L. ssp. Pekinensis) to Salt Stress
Source: Int J Mol Sci. 2017 Sep 12;18(9):1953. doi: 10.3390/ijms18091953 (PMC5618602; doi:10.3390/ijms18091953)
Supplement: Supplementary file 1 [file ijms-18-01953-s001.zip]

Archive with 4 entries (4 files):
- Fig. S1.pdf
- Table S1.xls
- Table S2.pdf
- Table S3.pdf
