# Supplementary material for: Physiological and Transcriptomic Responses of Chinese Cabbage (Brassica rapa L. ssp. Pekinensis) to Salt Stress
Source: Int J Mol Sci. 2017 Sep 12;18(9):1953. doi: 10.3390/ijms18091953 (PMC5618602; doi:10.3390/ijms18091953)
Supplement: Supplementary file 1 [file ijms-18-01953-s001.zip › Table S1.xls]

## Sheet: DEGs
GeneID	geneLength	Means-0 mM NaCl	Means-200 mM NaCl	log2Ratio(NaCl-200 mM/NaCl-0 mM)	Up-Down-Regulation(NaCl-12h/CK-12h)	Probability	KEGG Orthology	GO Component	GO Function	GO Process	Blast nr	BlastX to A. thaliana
Bra021457	207	0.01	127.05	13.6331	Up	0.99104	-	-	-	-	gi|685266077|ref|XP_009118068.1|/5.02399e-10/PREDICTED: stress-induced protein KIN2-like [Brassica rapa]	AT3G02480.1 Late embryogenesis abundant protein (LEA) family protein
Bra027219	690	0.01	47.855	12.2245	Up	0.976648	-	GO:0043231//intracellular membrane-bounded organelle	-	-	gi|685311280|ref|XP_009146210.1|/2.76505e-68/PREDICTED: late embryogenesis abundant protein 76-like [Brassica rapa]	AT3G15670.1 Late embryogenesis abundant protein (LEA) family protein
Bra033928	243	0.01	16.595	10.6965	Up	0.932339	-	-	-	-	gi|685273194|ref|XP_009127637.1|/2.55012e-29/PREDICTED: uncharacterized protein LOC103852488 [Brassica rapa]	AT1G68500.1 unknown protein; BEST Arabidopsis thaliana protein match is: unknown protein (TAIR:AT1G25422.1); Has 16 Blast hits to 16 proteins in 6 species: Archae - 0; Bacteria - 0; Metazoa - 0; Fungi - 0; Plants - 16; Viruses - 0; Other Eukaryotes - 0 (source: NCBI BLink).
Bra001603	615	0.01	12.625	10.3021	Up	0.912531	-	GO:0043231//intracellular membrane-bounded organelle	-	GO:0003006//developmental process involved in reproduction	gi|685289012|ref|XP_009135453.1|/3.90269e-77/PREDICTED: late embryogenesis abundant protein 76-like [Brassica rapa]	AT3G15670.1 Late embryogenesis abundant protein (LEA) family protein
Bra029121	1980	0.01	10.895	10.0895	Up	0.90024	-	-	-	GO:0009414//response to water deprivation;GO:0006970//response to osmotic stress;GO:0009755//hormone-mediated signaling pathway	gi|685283242|ref|XP_009132533.1|/0/PREDICTED: low-temperature-induced 65 kDa protein-like [Brassica rapa]	AT5G52300.2 LOW-TEMPERATURE-INDUCED 65
Bra004430	537	0.01	9.725	9.92555	Up	0.889573	-	GO:0044431//Golgi apparatus part	-	GO:0009725//response to hormone;GO:0006970//response to osmotic stress	gi|685303588|ref|XP_009142502.1|/3.0862e-85/PREDICTED: translocator protein homolog [Brassica rapa]	AT2G47770.1 TSPO(outer membrane tryptophan-rich sensory protein)-related
Bra005353	297	0.01	9.1	9.82972	Up	0.882877	-	-	-	GO:0007275//multicellular organismal development;GO:0003006//developmental process involved in reproduction	gi|685305909|ref|XP_009143683.1|/2.49246e-48/PREDICTED: uncharacterized protein LOC103867375 [Brassica rapa]	AT2G35300.1 Late embryogenesis abundant protein, group 1 protein
Bra017923	219	0.01	7.82	9.61102	Up	0.866187	-	-	-	-	gi|674882128|emb|CDY50247.1|/1.45047e-25/BnaA06g15240D [Brassica napus]	-
Bra017922	168	0.01	7.565	9.5632	Up	0.862511	-	GO:0043231//intracellular membrane-bounded organelle	-	GO:0006950//response to stress	gi|674882127|emb|CDY50246.1|/2.85381e-23/BnaA06g15230D [Brassica napus]	AT1G21520.1 unknown protein; Has 9 Blast hits to 9 proteins in 2 species: Archae - 0; Bacteria - 0; Metazoa - 0; Fungi - 0; Plants - 9; Viruses - 0; Other Eukaryotes - 0 (source: NCBI BLink).
Bra040107	753	0.24	174.1	9.50267	Up	0.993075	-	GO:0044464	-	GO:0000902//cell morphogenesis;GO:0009827//plant-type cell wall modification;GO:0000003//reproduction	gi|687567671|ref|NP_001288835.1|/3.28241e-133/expansin-like B1 precursor [Brassica rapa]	AT4G17030.1 expansin-like B1
Bra001519	645	0.01	6.735	9.39553	Up	0.847808	K04506|1|2e-64|243|pop:POPTR_555252|E3 ubiquitin-protein ligase SIAH1 [EC:6.3.2.19]	GO:0043231//intracellular membrane-bounded organelle	GO:0046914//transition metal ion binding;GO:0019787//small conjugating protein transferase activity	GO:0019941//modification-dependent protein catabolic process;GO:0032501//multicellular organismal process;GO:0032446//protein modification by small protein conjugation	gi|685288731|ref|XP_009135318.1|/2.67188e-127/PREDICTED: E3 ubiquitin-protein ligase SINAT2 [Brassica rapa]	AT3G13672.1 TRAF-like superfamily protein
Bra017815	255	0.01	6.105	9.25385	Up	0.835171	-	GO:0044464	-	-	gi|674903439|emb|CDY29544.1|/6.39198e-42/BnaA03g53890D [Brassica napus]	AT4G37295.1 unknown protein; FUNCTIONS IN: molecular_function unknown; INVOLVED IN: biological_process unknown; LOCATED IN: endomembrane system; EXPRESSED IN: stem, root, leaf; EXPRESSED DURING: LP.06 six leaves visible, LP.04 four leaves visible; Has 30201 Blast hits to 17322 proteins in 780 species: Archae - 12; Bacteria - 1396; Metazoa - 17338; Fungi - 3422; Plants - 5037; Viruses - 0; Other E…
Bra025252	156	0.01	5.88	9.19967	Up	0.829953	-	-	-	-	gi|674919590|emb|CDY13684.1|/3.42209e-10/BnaA06g32390D [Brassica napus]	-
Bra034480	177	0.01	5.745	9.16616	Up	0.827064	-	-	-	-	-	-
Bra002482	312	0.01	5.105	8.99577	Up	0.810129	-	-	-	-	gi|685374755|ref|XP_009120572.1|/2.355e-46/PREDICTED: uncharacterized protein LOC103845459 [Brassica rapa]	AT5G60400.3 unknown protein; Has 35333 Blast hits to 34131 proteins in 2444 species: Archae - 798; Bacteria - 22429; Metazoa - 974; Fungi - 991; Plants - 531; Viruses - 0; Other Eukaryotes - 9610 (source: NCBI BLink).
Bra002653	285	0.01	4.99	8.9629	Up	0.806207	-	GO:0044464	-	GO:0048229//gametophyte development	gi|674899912|emb|CDY32988.1|/6.21693e-46/BnaA10g11940D [Brassica napus]	AT4G13235.1 embryo sac development arrest 21
Bra009225	480	0.635	304.67	8.90628	Up	0.995241	-	-	-	GO:0006950//response to stress;GO:0032502//developmental process	gi|674963837|emb|CDX70069.1|/6.24971e-40/BnaA10g24180D [Brassica napus]	AT5G06760.1 Late Embryogenesis Abundant 4-5
Bra022221	897	0.755	290.695	8.58881	Up	0.994404	-	-	-	-	gi|685310849|ref|XP_009146007.1|/1.3106e-110/PREDICTED: late embryogenesis abundant protein, group 3-like [Brassica rapa]	AT3G17520.1 Late embryogenesis abundant protein (LEA) family protein
Bra009445	1392	0.225	63.07	8.13089	Up	0.978847	K15397|1|3e-91|333|bdi:100843954|3-ketoacyl-CoA synthase [EC:2.3.1.-]	GO:0044464	GO:0016747//transferase activity, transferring acyl groups other than amino-acyl groups	GO:0009314//response to radiation;GO:0006950//response to stress;GO:0006631//fatty acid metabolic process	gi|685379795|ref|XP_009122587.1|/0/PREDICTED: 3-ketoacyl-CoA synthase 21 [Brassica rapa]	AT5G04530.1 3-ketoacyl-CoA synthase 19
Bra012684	753	0.34	80.905	7.89455	Up	0.981587	-	GO:0044464	-	GO:0000902//cell morphogenesis;GO:0009827//plant-type cell wall modification;GO:0000003//reproduction	gi|674869253|emb|CDY65447.1|/4.94029e-133/BnaA03g58070D [Brassica napus]	AT4G17030.1 expansin-like B1
Bra023394	894	0.385	75.92	7.62348	Up	0.97929	K15382|1|4e-133|471|aly:ARALYDRAFT_488133|solute carrier family 50 (sugar transporter)	GO:0016021//integral component of membrane	GO:0015144//carbohydrate transmembrane transporter activity	GO:0010260//organ senescence;GO:0006970//response to osmotic stress;GO:0009751//response to salicylic acid;GO:0009737//response to abscisic acid;GO:0071702	gi|685269770|ref|XP_009125890.1|/1.23056e-163/PREDICTED: bidirectional sugar transporter SWEET15-like [Brassica rapa]	AT5G13170.1 senescence-associated gene 29
Bra032670	1887	0.15	26.205	7.44874	Up	0.949685	K15404|1|0.0|1125|ath:AT1G02205|aldehyde decarbonylase [EC:4.1.99.5]	GO:0044464	GO:0016830//carbon-carbon lyase activity	GO:0006633//fatty acid biosynthetic process;GO:0007275//multicellular organismal development;GO:0006081//cellular aldehyde metabolic process	gi|685370121|ref|XP_009118866.1|/0/PREDICTED: protein ECERIFERUM 1 [Brassica rapa]	AT1G02205.2 Fatty acid hydroxylase superfamily
Bra032992	834	0.13	18.355	7.14152	Up	0.928417	-	-	-	-	gi|685276962|ref|XP_009129434.1|/1.27346e-162/PREDICTED: uncharacterized protein LOC103854254 [Brassica rapa]	AT3G27250.1 unknown protein; BEST Arabidopsis thaliana protein match is: unknown protein (TAIR:AT5G40800.1); Has 104 Blast hits to 104 proteins in 13 species: Archae - 0; Bacteria - 0; Metazoa - 0; Fungi - 0; Plants - 104; Viruses - 0; Other Eukaryotes - 0 (source: NCBI BLink).
Bra005174	828	0.38	50.36	7.05014	Up	0.967097	K07025|1|2e-103|373|gmx:100796466|putative hydrolase of the HAD superfamily	-	-	-	gi|685305476|ref|XP_009143463.1|/3.98508e-152/PREDICTED: uncharacterized protein C24B11.05-like [Brassica rapa]	AT5G02230.2 Haloacid dehalogenase-like hydrolase (HAD) superfamily protein
Bra031809	579	1.66	196.815	6.88951	Up	0.981653	-	-	-	-	gi|674952224|emb|CDX81402.1|/5.36086e-10/BnaC09g08130D [Brassica napus]	AT5G66400.1 Dehydrin family protein
Bra006721	348	5.09	582.845	6.8393	Up	0.984804	-	GO:0005576//extracellular region;GO:0030312//external encapsulating structure	GO:0005488//binding	GO:0009725//response to hormone;GO:0006970//response to osmotic stress;GO:0051234//establishment of localization;GO:0010876//lipid localization	gi|674944629|emb|CDX88696.1|/5.72467e-59/BnaA03g09530D [Brassica napus]	AT5G59320.1 lipid transfer protein 3
Bra037177	435	38.745	4374.59	6.81899	Up	0.986231	-	-	-	-	gi|674952224|emb|CDX81402.1|/2.30382e-12/BnaC09g08130D [Brassica napus]	AT5G66400.1 Dehydrin family protein
Bra021436	207	0.99	106.655	6.75131	Up	0.974481	-	-	-	-	gi|674898213|emb|CDY34732.1|/4.58341e-10/BnaA01g32930D [Brassica napus]	AT3G02480.1 Late embryogenesis abundant protein (LEA) family protein
Bra027756	2496	0.075	8.04	6.74416	Up	0.853945	K13254|1|5e-62|237|osa:4339999|spastin [EC:3.6.4.3]	-	GO:0032559;GO:0016462//pyrophosphatase activity	-	gi|685355618|ref|XP_009112803.1|/0/PREDICTED: peroxisome biosynthesis protein PAS1 [Brassica rapa]	AT1G64110.2 P-loop containing nucleoside triphosphate hydrolases superfamily protein
Bra039956	789	0.23	23.2	6.65635	Up	0.934456	K10779|1|1e-08|58.5|smo:SELMODRAFT_443867|transcriptional regulator ATRX [EC:3.6.4.12]	-	-	GO:0003006//developmental process involved in reproduction	gi|685309415|ref|XP_009145325.1|/1.3169e-112/PREDICTED: late embryogenesis abundant protein D-34-like [Brassica rapa]	AT3G22490.1 Seed maturation protein
Bra020322	339	36.345	3071.86	6.40121	Up	0.979684	-	GO:0005576//extracellular region;GO:0030312//external encapsulating structure	GO:0005488//binding	GO:0009725//response to hormone;GO:0006970//response to osmotic stress;GO:0051234//establishment of localization;GO:0010876//lipid localization	gi|685271321|ref|XP_009126702.1|/4.04304e-49/PREDICTED: non-specific lipid-transfer protein 4-like [Brassica rapa]	AT5G59310.1 lipid transfer protein 4
Bra031699	1143	0.085	6.225	6.19447	Up	0.812541	K00826|1|0.0|687|ath:AT1G10070|branched-chain amino acid aminotransferase [EC:2.6.1.42]	GO:0009536//plastid	GO:0004084//branched-chain-amino-acid transaminase activity	GO:0006520//cellular amino acid metabolic process	gi|685368746|ref|XP_009118270.1|/0/PREDICTED: branched-chain-amino-acid aminotransferase 2, chloroplastic-like isoform X2 [Brassica rapa]	AT1G10070.2 branched-chain amino acid transaminase 2
Bra029172	333	11.765	808.325	6.10236	Up	0.97243	-	GO:0005576//extracellular region;GO:0030312//external encapsulating structure	GO:0005488//binding	GO:0009725//response to hormone;GO:0006950//response to stress;GO:0051234//establishment of localization;GO:0010876//lipid localization	gi|674893920|emb|CDY38865.1|/3.70582e-55/BnaA03g13140D [Brassica napus]	AT5G59320.1 lipid transfer protein 3
Bra008850	630	3.905	251.125	6.00694	Up	0.967146	K15382|1|3e-95|345|aly:ARALYDRAFT_488133|solute carrier family 50 (sugar transporter)	GO:0016021//integral component of membrane	GO:0015144//carbohydrate transmembrane transporter activity	GO:0010260//organ senescence;GO:0006970//response to osmotic stress;GO:0009751//response to salicylic acid;GO:0009737//response to abscisic acid;GO:0071702	gi|685377931|ref|XP_009121791.1|/1.12393e-119/PREDICTED: LOW QUALITY PROTEIN: bidirectional sugar transporter SWEET15 [Brassica rapa]	AT5G13170.1 senescence-associated gene 29
Bra006185	951	0.42	26.98	6.00536	Up	0.928876	K15382|1|3e-124|442|aly:ARALYDRAFT_488133|solute carrier family 50 (sugar transporter)	GO:0016021//integral component of membrane	GO:0015144//carbohydrate transmembrane transporter activity	GO:0010260//organ senescence;GO:0006970//response to osmotic stress;GO:0009751//response to salicylic acid;GO:0009737//response to abscisic acid;GO:0071702	gi|674954931|emb|CDX78511.1|/5.57896e-151/BnaA03g04230D [Brassica napus]	AT5G13170.1 senescence-associated gene 29
Bra020323	336	22.08	1372.87	5.95831	Up	0.969952	-	GO:0005576//extracellular region;GO:0030312//external encapsulating structure	-	GO:0009725//response to hormone;GO:0006950//response to stress;GO:0051234//establishment of localization	gi|674930622|emb|CDY02883.1|/5.95207e-50/BnaC02g10060D [Brassica napus]	AT5G59320.1 lipid transfer protein 3
Bra021362	219	0.925	56.5	5.93265	Up	0.949751	-	-	-	-	gi|674882453|emb|CDY49938.1|/3.8082e-34/BnaCnng18480D [Brassica napus]	AT3G03341.1 unknown protein; Has 30201 Blast hits to 17322 proteins in 780 species: Archae - 12; Bacteria - 1396; Metazoa - 17338; Fungi - 3422; Plants - 5037; Viruses - 0; Other Eukaryotes - 2996 (source: NCBI BLink).
Bra005911	480	6.74	407.635	5.91839	Up	0.966752	-	-	-	GO:0006950//response to stress	gi|685280090|ref|XP_009130961.1|/7.0686e-47/PREDICTED: 18 kDa seed maturation protein-like [Brassica rapa]	AT5G06760.1 Late Embryogenesis Abundant 4-5
Bra025665	639	0.305	18.285	5.90571	Up	0.906837	-	GO:0009536//plastid	-	-	gi|685298220|ref|XP_009139901.1|/5.72891e-123/PREDICTED: uncharacterized protein LOC103863894 [Brassica rapa]	AT5G39520.1 Protein of unknown function (DUF1997)
Bra006981	252	0.85	50.21	5.88437	Up	0.946354	-	-	-	-	gi|685363527|ref|XP_009116018.1|/8.0128e-21/PREDICTED: uncharacterized protein LOC103841248 [Brassica rapa]	AT3G53235.1 unknown protein; Has 9 Blast hits to 9 proteins in 4 species: Archae - 0; Bacteria - 0; Metazoa - 0; Fungi - 0; Plants - 9; Viruses - 0; Other Eukaryotes - 0 (source: NCBI BLink).
Bra013974	336	2.62	134.455	5.68141	Up	0.955248	-	-	-	-	gi|674894334|emb|CDY38433.1|/1.80347e-53/BnaA10g17250D [Brassica napus]	AT3G03341.1 unknown protein; Has 30201 Blast hits to 17322 proteins in 780 species: Archae - 12; Bacteria - 1396; Metazoa - 17338; Fungi - 3422; Plants - 5037; Viruses - 0; Other Eukaryotes - 2996 (source: NCBI BLink).
Bra015388	1014	0.39	18.71	5.58419	Up	0.90001	K11228|1|2e-44|177|ota:Ot13g01170|mitogen-activated protein kinase kinase kinase [EC:2.7.11.1];K13414|2|8e-42|169|ath:AT4G08500|mitogen-activated protein kinase kinase kinase 1, plant [EC:2.7.11.25]	-	GO:0004672//protein kinase activity;GO:0032559	GO:0006464//cellular protein modification process	gi|685371002|ref|XP_009119207.1|/0/PREDICTED: mitogen-activated protein kinase kinase kinase 2 [Brassica rapa]	AT1G05100.1 mitogen-activated protein kinase kinase kinase 18
Bra019549	777	1.33	63.575	5.57896	Up	0.943285	-	-	-	-	gi|674894942|emb|CDY37923.1|/5.5205e-140/BnaA06g18940D [Brassica napus]	AT3G48510.1 unknown protein; BEST Arabidopsis thaliana protein match is: unknown protein (TAIR:AT5G63350.1); Has 98 Blast hits to 98 proteins in 11 species: Archae - 0; Bacteria - 0; Metazoa - 0; Fungi - 0; Plants - 98; Viruses - 0; Other Eukaryotes - 0 (source: NCBI BLink).
Bra011443	294	0.33	15.595	5.56247	Up	0.887932	-	-	-	-	gi|674957963|emb|CDX75355.1|/7.03154e-50/BnaA01g03470D [Brassica napus]	AT4G33467.2 unknown protein; Has 25 Blast hits to 25 proteins in 9 species: Archae - 0; Bacteria - 0; Metazoa - 0; Fungi - 0; Plants - 25; Viruses - 0; Other Eukaryotes - 0 (source: NCBI BLink).
Bra006951	1344	0.33	15.505	5.55412	Up	0.887554	-	GO:0044464	GO:0043169//cation binding;GO:0016791//phosphatase activity	-	gi|685363442|ref|XP_009115982.1|/0/PREDICTED: purple acid phosphatase 22 [Brassica rapa]	AT3G52820.1 purple acid phosphatase 22
Bra003027	885	0.45	17.965	5.31912	Up	0.890475	-	GO:0031225//anchored component of membrane;GO:0005576//extracellular region;GO:0009536//plastid	GO:0046914//transition metal ion binding	-	gi|685372818|ref|XP_009119928.1|/4.27301e-124/PREDICTED: early nodulin-like protein 2 [Brassica rapa]	AT5G53870.1 early nodulin-like protein 1
Bra009545	507	1.195	46.455	5.28075	Up	0.927629	-	-	-	-	gi|674964091|emb|CDX70323.1|/1.80684e-44/BnaA10g26720D [Brassica napus]	AT5G03210.1 unknown protein; FUNCTIONS IN: molecular_function unknown; INVOLVED IN: biological_process unknown; LOCATED IN: endomembrane system; EXPRESSED IN: 11 plant structures; EXPRESSED DURING: 7 growth stages; Has 6 Blast hits to 6 proteins in 2 species: Archae - 0; Bacteria - 0; Metazoa - 0; Fungi - 0; Plants - 6; Viruses - 0; Other Eukaryotes - 0 (source: NCBI BLink).
Bra029462	300	4.945	192.185	5.28038	Up	0.946271	-	-	-	-	gi|674916561|emb|CDY16706.1|/2.57894e-06/BnaA09g20840D [Brassica napus]	-
Bra005153	348	22.505	869.575	5.27199	Up	0.951063	-	GO:0044464	GO:0016787//hydrolase activity;GO:0005488//binding	GO:0010876//lipid localization	gi|685305438|ref|XP_009143445.1|/8.26641e-58/PREDICTED: non-specific lipid-transfer protein 1 [Brassica rapa]	AT2G37870.1 Bifunctional inhibitor/lipid-transfer protein/seed storage 2S albumin superfamily protein
Bra030067	618	3.035	113.755	5.22809	Up	0.940396	-	GO:0031225//anchored component of membrane	-	-	gi|674929501|emb|CDY03956.1|/1.47552e-50/BnaC07g11810D [Brassica napus]	AT1G27950.1 glycosylphosphatidylinositol-anchored lipid protein transfer 1
Bra002594	1239	2.22	82.265	5.21165	Up	0.936589	K14497|1|2e-150|530|ath:AT5G59220|protein phosphatase 2C [EC:3.1.3.16]	GO:0044464	GO:0004721//phosphoprotein phosphatase activity	GO:0009725//response to hormone;GO:0006950//response to stress;GO:0008152//metabolic process	gi|685374348|ref|XP_009120420.1|/0/PREDICTED: probable protein phosphatase 2C 78 [Brassica rapa]	AT5G59220.1 highly ABA-induced PP2C gene 1
Bra017051	2154	0.365	13.295	5.18684	Up	0.864842	K12657|1|0.0|1216|ath:AT2G39800|delta-1-pyrroline-5-carboxylate synthetase [EC:2.7.2.11 1.2.1.41]	GO:0009536//plastid	GO:0016620//oxidoreductase activity, acting on the aldehyde or oxo group of donors, NAD or NADP as acceptor;GO:0016774//phosphotransferase activity, carboxyl group as acceptor	GO:0009725//response to hormone;GO:0009414//response to water deprivation;GO:0006560//proline metabolic process;GO:0006972//hyperosmotic response;GO:0048513//organ development	gi|685302257|ref|XP_009141837.1|/0/PREDICTED: delta-1-pyrroline-5-carboxylate synthase A [Brassica rapa]	AT2G39800.4 delta1-pyrroline-5-carboxylate synthase 1
Bra011634	249	0.4	14.21	5.15076	Up	0.868403	-	-	-	-	gi|674962826|emb|CDX70829.1|/5.71982e-14/BnaC03g09130D [Brassica napus]	-
Bra017477	1398	1.06	37.445	5.14264	Up	0.917963	K14445|1|0.0|838|aly:ARALYDRAFT_494217|solute carrier family 13 (sodium-dependent dicarboxylate transporter), member 2/3/5	GO:0043231//intracellular membrane-bounded organelle	GO:0015556//C4-dicarboxylate transmembrane transporter activity	GO:0015743//malate transport;GO:0030641//regulation of cellular pH;GO:0030001//metal ion transport	gi|685359357|ref|XP_009114268.1|/0/PREDICTED: tonoplast dicarboxylate transporter-like isoform X2 [Brassica rapa]	AT5G47560.1 tonoplast dicarboxylate transporter
Bra000964	399	0.235	7.915	5.07386	Up	0.811343	-	-	-	-	gi|674959638|emb|CDX74343.1|/1.7126e-57/BnaA03g27040D [Brassica napus]	AT4G00670.1 Remorin family protein
Bra008491	504	3.86	129.3	5.06598	Up	0.937131	K08234|1|2e-11|66.2|cre:CHLREDRAFT_143257|glyoxylase I family protein	-	GO:0003824//catalytic activity	-	gi|685274927|ref|XP_009128447.1|/2.39431e-94/PREDICTED: uncharacterized protein LOC103853278 [Brassica rapa]	AT1G80160.1 Lactoylglutathione lyase / glyoxalase I family protein
Bra019758	663	0.715	23.65	5.04775	Up	0.896613	-	-	-	-	gi|674935421|emb|CDX98072.1|/1.91524e-119/BnaA06g08230D [Brassica napus]	AT1G12320.1 Protein of unknown function (DUF1442)
Bra040832	231	0.435	13.815	4.98908	Up	0.8611	-	GO:0009526//plastid envelope	-	-	gi|674922905|emb|CDY10293.1|/9.7733e-24/BnaC05g29860D [Brassica napus]	AT3G22620.1 Bifunctional inhibitor/lipid-transfer protein/seed storage 2S albumin superfamily protein
Bra017351	762	0.62	19.69	4.98905	Up	0.884026	K10525|1|3e-117|419|ath:AT3G25770|allene oxide cyclase [EC:5.3.99.6]	GO:0009526//plastid envelope;GO:0009532//plastid stroma;GO:0031090//organelle membrane;GO:0009534//chloroplast thylakoid	GO:0009975//cyclase activity	GO:0009414//response to water deprivation;GO:0006970//response to osmotic stress;GO:0051707//response to other organism	gi|674929243|emb|CDY04177.1|/2.22568e-146/BnaA09g19550D [Brassica napus]	AT3G25770.1 allene oxide cyclase 2
Bra022584	1719	10.295	312.78	4.92513	Up	0.938608	-	-	-	GO:0006970//response to osmotic stress;GO:0009755//hormone-mediated signaling pathway	gi|685272368|ref|XP_009127250.1|/0/PREDICTED: low-temperature-induced 65 kDa protein-like [Brassica rapa]	AT5G52300.1 Low temperature induced 65
Bra012687	753	2.425	71.835	4.88863	Up	0.924609	-	GO:0044464	-	GO:0000902//cell morphogenesis;GO:0009827//plant-type cell wall modification;GO:0000003//reproduction	gi|685291749|ref|XP_009136814.1|/8.56865e-133/PREDICTED: expansin-like B1 [Brassica rapa]	AT4G17030.1 expansin-like B1
Bra034344	1113	0.34	9.56	4.8134	Up	0.824734	K01757|1|1e-39|161|ath:AT1G74020|strictosidine synthase [EC:4.3.3.2]	GO:0043231//intracellular membrane-bounded organelle	GO:0016843	GO:0009820//alkaloid metabolic process	gi|685300089|ref|XP_009140788.1|/0/PREDICTED: strictosidine synthase 1-like [Brassica rapa]	AT3G57020.1 Calcium-dependent phosphotriesterase superfamily protein
Bra009738	1551	1.99	55.545	4.80282	Up	0.917438	K00511|1|0.0|766|aly:ARALYDRAFT_662237|squalene monooxygenase [EC:1.14.13.132]	GO:0031224//intrinsic component of membrane	GO:0004497//monooxygenase activity;GO:0050662//coenzyme binding	GO:0006694//steroid biosynthetic process	gi|685322116|ref|XP_009150944.1|/0/PREDICTED: squalene monooxygenase 1,2 [Brassica rapa]	AT5G24150.1 FAD/NAD(P)-binding oxidoreductase family protein
Bra015579	1281	1.695	47.21	4.79974	Up	0.913893	K14497|1|3e-158|556|ath:AT1G07430|protein phosphatase 2C [EC:3.1.3.16]	-	GO:0004721//phosphoprotein phosphatase activity	-	gi|685370384|ref|XP_009118961.1|/0/PREDICTED: protein phosphatase 2C 3 [Brassica rapa]	AT1G07430.1 highly ABA-induced PP2C gene 2
Bra034570	345	2.595	70.62	4.76627	Up	0.921606	K02605|1|1e-09|59.7|smo:SELMODRAFT_427211|origin recognition complex subunit 3	GO:0044464	GO:0005488//binding	GO:0010876//lipid localization	gi|685345262|ref|XP_009108795.1|/1.82817e-59/PREDICTED: uncharacterized protein LOC103834475 [Brassica rapa]	AT4G33550.2 Bifunctional inhibitor/lipid-transfer protein/seed storage 2S albumin superfamily protein
Bra034568	345	2.595	70.62	4.76627	Up	0.921606	K02605|1|1e-09|59.7|smo:SELMODRAFT_427211|origin recognition complex subunit 3	GO:0044464	GO:0005488//binding	GO:0010876//lipid localization	gi|685345262|ref|XP_009108795.1|/1.82817e-59/PREDICTED: uncharacterized protein LOC103834475 [Brassica rapa]	AT4G33550.2 Bifunctional inhibitor/lipid-transfer protein/seed storage 2S albumin superfamily protein
Bra025546	933	0.39	10.255	4.71671	Up	0.828476	-	-	-	-	gi|685298524|ref|XP_009140040.1|/8.0118e-171/PREDICTED: uncharacterized protein LOC103864026 isoform X1 [Brassica rapa]	AT5G40790.1 unknown protein; BEST Arabidopsis thaliana protein match is: unknown protein (TAIR:AT3G27250.1); Has 1807 Blast hits to 1807 proteins in 277 species: Archae - 0; Bacteria - 0; Metazoa - 736; Fungi - 347; Plants - 385; Viruses - 0; Other Eukaryotes - 339 (source: NCBI BLink).
Bra030668	495	0.58	15.16	4.70807	Up	0.860756	-	-	-	-	gi|685350997|ref|XP_009110967.1|/8.26913e-81/PREDICTED: uncharacterized protein LOC103836461 [Brassica rapa]	AT1G06980.1 unknown protein; FUNCTIONS IN: molecular_function unknown; INVOLVED IN: biological_process unknown; LOCATED IN: endomembrane system; EXPRESSED IN: sepal, male gametophyte, carpel; EXPRESSED DURING: 4 anthesis; BEST Arabidopsis thaliana protein match is: unknown protein (TAIR:AT2G30230.1); Has 159 Blast hits to 159 proteins in 13 species: Archae - 0; Bacteria - 0; Metazoa - 0; Fungi - …
Bra021442	591	15.275	398.755	4.70626	Up	0.93398	K05770|1|1e-08|57.4|ppp:PHYPADRAFT_190625|benzodiazapine receptor	GO:0044431//Golgi apparatus part;GO:0031224//intrinsic component of membrane	-	GO:0009725//response to hormone;GO:0006970//response to osmotic stress	gi|685266116|ref|XP_009118224.1|/1.41774e-101/PREDICTED: translocator protein homolog [Brassica rapa]	AT2G47770.1 TSPO(outer membrane tryptophan-rich sensory protein)-related
Bra033329	678	1.995	50.655	4.66624	Up	0.912466	-	-	-	-	gi|685371971|ref|XP_009119626.1|/8.34722e-92/PREDICTED: uncharacterized protein LOC103844579 isoform X1 [Brassica rapa]	AT1G02470.1 Polyketide cyclase/dehydrase and lipid transport superfamily protein
Bra024795	690	1.095	26.77	4.61161	Up	0.889409	K01166|1|1e-98|356|ath:AT2G02990|ribonuclease T2 [EC:3.1.27.1]	GO:0030312//external encapsulating structure;GO:0016020//membrane	GO:0003676//nucleic acid binding;GO:0016892	GO:0009813//flavonoid biosynthetic process;GO:0009267//cellular response to starvation;GO:0007165//signal transduction;GO:0032502//developmental process	gi|674887453|emb|CDY45186.1|/3.25848e-106/BnaA06g33900D [Brassica napus]	AT2G02990.1 ribonuclease 1
Bra004756	1512	2.98	70.83	4.57098	Up	0.915485	K08150|1|0.0|744|ath:AT2G43330|MFS transporter, SP family, solute carrier family 2 (myo-inositol transporter), member 13	GO:0000325//plant-type vacuole;GO:0016020//membrane	GO:0005365//myo-inositol transmembrane transporter activity	GO:0015791//polyol transport	gi|685304410|ref|XP_009142925.1|/0/PREDICTED: inositol transporter 1-like [Brassica rapa]	AT2G43330.1 inositol transporter 1
Bra015296	1590	1.765	37.545	4.41088	Up	0.897515	K15397|1|0.0|901|aly:ARALYDRAFT_470398|3-ketoacyl-CoA synthase [EC:2.3.1.-]	GO:0044464	GO:0004312//fatty acid synthase activity	GO:0009314//response to radiation;GO:0006950//response to stress;GO:0006631//fatty acid metabolic process	gi|685371267|ref|XP_009119325.1|/0/PREDICTED: 3-ketoacyl-CoA synthase 17 [Brassica rapa]	AT1G04220.1 3-ketoacyl-CoA synthase 2
Bra016511	744	0.965	20.46	4.40613	Up	0.870159	-	-	-	GO:0009607//response to biotic stimulus	gi|685349293|ref|XP_009110283.1|/3.44509e-140/PREDICTED: pathogenesis-related protein 5-like [Brassica rapa]	AT1G19320.1 Pathogenesis-related thaumatin superfamily protein
Bra016510	744	0.965	20.46	4.40613	Up	0.870159	-	-	-	GO:0009607//response to biotic stimulus	gi|685349290|ref|XP_009110282.1|/8.6956e-141/PREDICTED: pathogenesis-related protein 5-like [Brassica rapa]	AT1G19320.1 Pathogenesis-related thaumatin superfamily protein
Bra036273	453	1.32	26.15	4.3082	Up	0.878955	-	GO:0044464	-	-	gi|685351780|ref|XP_009111294.1|/7.34293e-81/PREDICTED: uncharacterized protein LOC103836754 [Brassica rapa]	AT4G02360.1 Protein of unknown function, DUF538
Bra015252	234	1.425	28.2	4.30666	Up	0.882434	-	-	-	-	gi|685371411|ref|XP_009119378.1|/1.33263e-37/PREDICTED: uncharacterized protein LOC103844330 [Brassica rapa]	AT2G15960.1 unknown protein; Has 14 Blast hits to 14 proteins in 5 species: Archae - 0; Bacteria - 0; Metazoa - 0; Fungi - 0; Plants - 14; Viruses - 0; Other Eukaryotes - 0 (source: NCBI BLink).
Bra005351	786	3.74	71.265	4.25208	Up	0.907854	-	-	-	-	gi|685305905|ref|XP_009143681.1|/2.40673e-136/PREDICTED: EID1-like F-box protein 3 [Brassica rapa]	AT3G63060.1 EID1-like 3
Bra004004	1041	6.08	114.03	4.2292	Up	0.91176	-	-	GO:0005488//binding	GO:0009755//hormone-mediated signaling pathway	gi|685335141|ref|XP_009105006.1|/1.05982e-150/PREDICTED: ninja-family protein AFP1-like [Brassica rapa]	AT1G69260.1 ABI five binding protein
Bra027020	615	3.265	59.475	4.18713	Up	0.902586	K02355|1|3e-15|79.7|vvi:100257414|elongation factor G;K01051|2|9e-14|74.7|vvi:100251413|pectinesterase [EC:3.1.1.11]	-	GO:0004857//enzyme inhibitor activity	-	gi|685356271|ref|XP_009113052.1|/1.88834e-106/PREDICTED: 21 kDa protein [Brassica rapa]	AT1G62760.1 Plant invertase/pectin methylesterase inhibitor superfamily protein
Bra013253	846	1.455	26.47	4.18527	Up	0.877051	-	-	GO:0003677//DNA binding	GO:0006351//transcription, DNA-templated	gi|685290232|ref|XP_009136076.1|/1.84221e-131/PREDICTED: heat stress transcription factor C-1-like [Brassica rapa]	AT3G24520.1 heat shock transcription factor C1
Bra025730	699	131.455	2315.72	4.13882	Up	0.919949	-	GO:0043231//intracellular membrane-bounded organelle;GO:0030312//external encapsulating structure;GO:0005576//extracellular region	GO:0005488//binding	GO:0009411//response to UV;GO:0010038//response to metal ion;GO:0009718//anthocyanin-containing compound biosynthetic process;GO:0009814//defense response, incompatible interaction	gi|685317834|ref|XP_009149413.1|/1.21621e-122/PREDICTED: pathogenesis-related protein 5-like isoform X2 [Brassica rapa]	AT1G19320.1 Pathogenesis-related thaumatin superfamily protein
Bra022512	843	2.39	41.725	4.12583	Up	0.892166	-	-	-	-	gi|685272591|ref|XP_009127359.1|/7.5559e-104/PREDICTED: uncharacterized protein LOC103852195 isoform X1 [Brassica rapa]	AT5G50360.1 unknown protein; BEST Arabidopsis thaliana protein match is: unknown protein (TAIR:AT3G48510.1); Has 1807 Blast hits to 1807 proteins in 277 species: Archae - 0; Bacteria - 0; Metazoa - 736; Fungi - 347; Plants - 385; Viruses - 0; Other Eukaryotes - 339 (source: NCBI BLink).
Bra033105	657	2.45	42.48	4.11593	Up	0.892609	-	-	GO:0005488//binding	-	gi|674888241|emb|CDY44386.1|/1.2642e-97/BnaA02g29910D [Brassica napus]	AT3G29575.4 ABI five binding protein 3
Bra007637	693	2.435	41.895	4.10478	Up	0.892166	K09338|1|5e-85|311|aly:ARALYDRAFT_486694|homeobox-leucine zipper protein	GO:0043231//intracellular membrane-bounded organelle	GO:0001071//nucleic acid binding transcription factor activity;GO:0003677//DNA binding	GO:0006355//regulation of transcription, DNA-templated;GO:0006970//response to osmotic stress;GO:0009755//hormone-mediated signaling pathway	gi|674875136|emb|CDY57869.1|/2.45261e-112/BnaA09g55520D [Brassica napus]	AT3G61890.1 homeobox 12
Bra028568	1434	8.465	140.785	4.05584	Up	0.909249	K00924|1|2e-22|105|ath:AT5G22850|[EC:2.7.1.-]	GO:0005576//extracellular region	GO:0004175//endopeptidase activity	GO:0019538//protein metabolic process	gi|685268397|ref|XP_009125277.1|/0/PREDICTED: protein ASPARTIC PROTEASE IN GUARD CELL 2 [Brassica rapa]	AT5G10770.1 Eukaryotic aspartyl protease family protein
Bra022511	639	0.63	10.395	4.04439	Up	0.808783	-	GO:0016020//membrane	GO:0015103//inorganic anion transmembrane transporter activity	GO:0006950//response to stress;GO:0015698//inorganic anion transport	gi|674916785|emb|CDY16372.1|/5.75221e-109/BnaA02g11760D [Brassica napus]	AT5G50200.1 nitrate transmembrane transporters
Bra005012	2154	58.795	966.225	4.03859	Up	0.916864	K12657|1|0.0|1237|ath:AT2G39800|delta-1-pyrroline-5-carboxylate synthetase [EC:2.7.2.11 1.2.1.41]	GO:0009536//plastid	GO:0016620//oxidoreductase activity, acting on the aldehyde or oxo group of donors, NAD or NADP as acceptor;GO:0016774//phosphotransferase activity, carboxyl group as acceptor	GO:0009725//response to hormone;GO:0009414//response to water deprivation;GO:0006560//proline metabolic process;GO:0006972//hyperosmotic response;GO:0048513//organ development	gi|685305124|ref|XP_009143283.1|/0/PREDICTED: delta-1-pyrroline-5-carboxylate synthase A isoform X1 [Brassica rapa]	AT2G39800.4 delta1-pyrroline-5-carboxylate synthase 1
Bra029933	1050	8.93	144.995	4.0212	Up	0.90943	K00430|1|1e-176|617|ath:AT3G49120|peroxidase [EC:1.11.1.7]	GO:0005618//cell wall;GO:0043231//intracellular membrane-bounded organelle;GO:0031090//organelle membrane;GO:0005576//extracellular region	GO:0016209//antioxidant activity;GO:0003824//catalytic activity;GO:0005506//iron ion binding	GO:0009314//response to radiation;GO:0006952//defense response;GO:0000902//cell morphogenesis;GO:0042743//hydrogen peroxide metabolic process	gi|685262666|ref|XP_009151778.1|/0/PREDICTED: peroxidase 34 [Brassica rapa]	AT3G49120.1 peroxidase CB
Bra013392	771	4.02	61.955	3.94595	Up	0.896482	-	-	-	-	gi|685258810|ref|XP_009132764.1|/5.94708e-118/PREDICTED: uncharacterized protein LOC103857348 [Brassica rapa]	AT4G19390.1 Uncharacterised protein family (UPF0114)
Bra004266	177	1.41	21.685	3.94293	Up	0.859492	-	-	-	-	gi|685335966|ref|XP_009105338.1|/1.64402e-26/PREDICTED: uncharacterized protein LOC103831210 [Brassica rapa]	AT1G24575.1 unknown protein; Has 7 Blast hits to 7 proteins in 2 species: Archae - 0; Bacteria - 0; Metazoa - 0; Fungi - 0; Plants - 7; Viruses - 0; Other Eukaryotes - 0 (source: NCBI BLink).
Bra031918	1425	5.74	87.075	3.92314	Up	0.901585	-	GO:0009526//plastid envelope	-	-	gi|685279033|ref|XP_009130454.1|/0/PREDICTED: extensin-like [Brassica rapa]	AT5G64430.1 Octicosapeptide/Phox/Bem1p family protein
Bra035703	741	7.9	116.96	3.88802	Up	0.902865	K03257|1|3e-18|89.7|aly:ARALYDRAFT_676814|translation initiation factor 4A	-	-	-	gi|685300332|ref|XP_009140901.1|/1.06369e-78/PREDICTED: uncharacterized protein LOC103864886 [Brassica rapa]	AT2G28400.1 Protein of unknown function, DUF584
Bra003191	573	1.68	24.675	3.87652	Up	0.864169	-	-	-	-	gi|685332377|ref|XP_009103928.1|/5.98064e-78/PREDICTED: uncharacterized protein LOC103829988 [Brassica rapa]	AT3G54680.1 proteophosphoglycan-related
Bra026022	450	2.16	31.555	3.86877	Up	0.875016	-	-	-	GO:0006970//response to osmotic stress	gi|674897851|emb|CDY35122.1|/8.31876e-66/BnaA06g11320D [Brassica napus]	AT1G16850.1 unknown protein; FUNCTIONS IN: molecular_function unknown; INVOLVED IN: response to salt stress; LOCATED IN: endomembrane system; EXPRESSED IN: leaf apex, leaf whorl, male gametophyte, flower, leaf; EXPRESSED DURING: LP.06 six leaves visible, LP.04 four leaves visible, LP.10 ten leaves visible, petal differentiation and expansion stage, LP.08 eight leaves visible; BEST Arabidopsis tha…
Bra038486	1482	2.255	32.63	3.855	Up	0.876296	-	GO:0005618//cell wall	GO:0004175//endopeptidase activity	GO:0019538//protein metabolic process	gi|685261521|ref|XP_009145725.1|/0/PREDICTED: aspartic proteinase nepenthesin-2 [Brassica rapa]	AT4G16563.1 Eukaryotic aspartyl protease family protein
Bra004516	765	8.445	121.11	3.84208	Up	0.903046	K09338|1|2e-57|219|ath:AT3G61890|homeobox-leucine zipper protein	GO:0043231//intracellular membrane-bounded organelle	GO:0001071//nucleic acid binding transcription factor activity;GO:0003677//DNA binding	GO:0006355//regulation of transcription, DNA-templated;GO:0006970//response to osmotic stress;GO:0009755//hormone-mediated signaling pathway	gi|674953606|emb|CDX80037.1|/1.33623e-120/BnaA05g01190D [Brassica napus]	AT2G46680.1 homeobox 7
Bra029900	900	0.815	11.655	3.83801	Up	0.814116	-	-	-	-	gi|685262565|ref|XP_009151376.1|/6.24254e-157/PREDICTED: uncharacterized protein LOC103874689 [Brassica rapa]	AT3G48510.1 unknown protein; BEST Arabidopsis thaliana protein match is: unknown protein (TAIR:AT5G63350.1); Has 98 Blast hits to 98 proteins in 11 species: Archae - 0; Bacteria - 0; Metazoa - 0; Fungi - 0; Plants - 98; Viruses - 0; Other Eukaryotes - 0 (source: NCBI BLink).
Bra023816	621	0.805	11.14	3.79062	Up	0.80747	-	GO:0009526//plastid envelope	-	-	gi|685264242|ref|XP_009108747.1|/2.31172e-69/PREDICTED: non-specific lipid-transfer protein-like protein At2g13820 [Brassica rapa]	AT3G22620.1 Bifunctional inhibitor/lipid-transfer protein/seed storage 2S albumin superfamily protein
Bra034818	624	1.44	19.91	3.78935	Up	0.850039	-	-	-	-	gi|674924801|emb|CDY08503.1|/6.13489e-54/BnaA05g27390D [Brassica napus]	AT3G11690.1 unknown protein; FUNCTIONS IN: molecular_function unknown; INVOLVED IN: biological_process unknown; LOCATED IN: chloroplast; EXPRESSED IN: 24 plant structures; EXPRESSED DURING: 15 growth stages; BEST Arabidopsis thaliana protein match is: unknown protein (TAIR:AT5G06380.1); Has 84 Blast hits to 84 proteins in 12 species: Archae - 0; Bacteria - 0; Metazoa - 0; Fungi - 0; Plants - 84; …
Bra020713	360	14.955	203.84	3.76874	Up	0.905064	-	-	-	GO:0044271//cellular nitrogen compound biosynthetic process;GO:0019759	gi|685277523|ref|XP_009129713.1|/2.25802e-57/PREDICTED: nitrile-specifier protein 5-like [Brassica rapa]	AT5G48180.1 nitrile specifier protein 5
Bra017429	1482	0.94	12.76	3.76282	Up	0.81904	K01580|1|0.0|941|aly:ARALYDRAFT_484123|glutamate decarboxylase [EC:4.1.1.15]	GO:0043231//intracellular membrane-bounded organelle;GO:0044444	GO:0005515//protein binding;GO:0016831//carboxy-lyase activity;GO:0048037//cofactor binding	GO:0009064//glutamine family amino acid metabolic process	gi|674929177|emb|CDY04111.1|/0/BnaA09g18890D [Brassica napus]	AT2G02010.1 glutamate decarboxylase 4
Bra005172	567	2.14	28.8	3.75039	Up	0.868501	-	GO:0044451	-	GO:0072595;GO:0009639//response to red or far red light	gi|685305466|ref|XP_009143458.1|/3.38873e-91/PREDICTED: uncharacterized protein LOC103867171 isoform X1 [Brassica rapa]	AT2G37678.1 far-red elongated hypocotyl 1
Bra039265	690	7.29	97.805	3.74592	Up	0.898008	K09338|1|9e-54|207|aly:ARALYDRAFT_486694|homeobox-leucine zipper protein	GO:0043231//intracellular membrane-bounded organelle	GO:0001071//nucleic acid binding transcription factor activity;GO:0003677//DNA binding	GO:0006355//regulation of transcription, DNA-templated;GO:0006970//response to osmotic stress;GO:0009755//hormone-mediated signaling pathway	gi|674905644|emb|CDY27308.1|/8.48893e-113/BnaC04g50970D [Brassica napus]	AT2G46680.1 homeobox 7
Bra010511	561	3.24	43.11	3.73396	Up	0.882926	-	-	-	-	gi|674866172|emb|CDY67336.1|/4.43985e-97/BnaCnng54540D [Brassica napus]	AT4G38940.1 Galactose oxidase/kelch repeat superfamily protein
Bra035698	690	1.62	21.495	3.72994	Up	0.853568	K01955|1|4e-53|205|vvi:100262205|carbamoyl-phosphate synthase large subunit [EC:6.3.5.5];K13944|2|7e-28|122|rcu:RCOM_0993260|LOB domain-containing protein 16	GO:0009536//plastid	-	-	gi|685300341|ref|XP_009140905.1|/5.62912e-91/PREDICTED: LOB domain-containing protein 11 [Brassica rapa]	AT2G28500.1 LOB domain-containing protein 11
Bra031574	1311	1.15	15.22	3.72626	Up	0.832365	K14497|1|1e-179|627|ath:AT1G07430|protein phosphatase 2C [EC:3.1.3.16]	GO:0043234//protein complex	GO:0004721//phosphoprotein phosphatase activity	GO:0006464//cellular protein modification process	gi|685369134|ref|XP_009118439.1|/0/PREDICTED: protein phosphatase 2C 3-like [Brassica rapa]	AT1G07430.1 highly ABA-induced PP2C gene 2
Bra017093	1605	1.915	24.83	3.69667	Up	0.861281	K08176|1|0.0|942|aly:ARALYDRAFT_482913|MFS transporter, PHS family, inorganic phosphate transporter	GO:0043231//intracellular membrane-bounded organelle;GO:0031224//intrinsic component of membrane	GO:0015291//secondary active transmembrane transporter activity;GO:0015103//inorganic anion transmembrane transporter activity	GO:0015698//inorganic anion transport;GO:0009725//response to hormone	gi|685302136|ref|XP_009141774.1|/0/PREDICTED: inorganic phosphate transporter 1-4 [Brassica rapa]	AT2G38940.1 phosphate transporter 1;4
Bra040610	579	15.345	198.72	3.6949	Up	0.902373	-	-	-	GO:0009628//response to abiotic stimulus	gi|685313439|ref|XP_009147308.1|/1.66616e-98/PREDICTED: putative gamma-glutamylcyclotransferase At3g02910 [Brassica rapa]	AT3G02910.1 AIG2-like (avirulence induced gene) family protein
Bra013744	1047	15.145	194.895	3.68578	Up	0.902225	K01784|1|0.0|649|aly:ARALYDRAFT_492472|UDP-glucose 4-epimerase [EC:5.1.3.2]	GO:0044444	GO:0005515//protein binding;GO:0016857//racemase and epimerase activity, acting on carbohydrates and derivatives;GO:0048037//cofactor binding	GO:0050896//response to stimulus;GO:0019318//hexose metabolic process	gi|685259870|ref|XP_009137528.1|/0/PREDICTED: UDP-glucose 4-epimerase 2 [Brassica rapa]	AT4G23920.1 UDP-D-glucose/UDP-D-galactose 4-epimerase 2
Bra038787	258	2.41	31.005	3.6854	Up	0.868895	-	GO:0043231//intracellular membrane-bounded organelle;GO:0031224//intrinsic component of membrane	GO:0030246//carbohydrate binding;GO:0016758//transferase activity, transferring hexosyl groups	GO:0009725//response to hormone;GO:0006464//cellular protein modification process	gi|674874721|emb|CDY58488.1|/7.82892e-23/BnaA03g58560D [Brassica napus]	AT4G21060.1 Galactosyltransferase family protein
Bra026902	1143	1.76	22.62	3.68395	Up	0.853847	-	-	-	-	gi|685368076|ref|XP_009117993.1|/0/PREDICTED: uncharacterized protein LOC103843048 [Brassica rapa]	AT1G13470.1 Protein of unknown function (DUF1262)
Bra022587	1251	3.145	39.635	3.65564	Up	0.878036	K05765|1|2e-75|280|aly:ARALYDRAFT_495305|cofilin	GO:0044464	-	-	gi|674906009|emb|CDY27075.1|/0/BnaA02g10950D [Brassica napus]	AT5G52390.1 PAR1 protein
Bra016949	1605	1.945	24.115	3.63209	Up	0.857047	K15015|1|0.0|877|aly:ARALYDRAFT_903425|solute carrier family 32 (vesicular inhibitory amino acid transporter)	GO:0031224//intrinsic component of membrane;GO:0031090//organelle membrane	GO:0005275//amine transmembrane transporter activity	-	gi|685302538|ref|XP_009141972.1|/0/PREDICTED: vacuolar amino acid transporter 1-like [Brassica rapa]	AT2G41190.1 Transmembrane amino acid transporter family protein
Bra023925	1131	4.21	50.98	3.59804	Up	0.884321	K13420|1|4e-35|147|ath:AT5G46330|LRR receptor-like serine/threonine-protein kinase FLS2 [EC:2.7.11.1]	GO:0005576//extracellular region;GO:0030312//external encapsulating structure;GO:0009536//plastid	-	GO:0023052//signaling	gi|685264549|ref|XP_009110137.1|/0/PREDICTED: DNA-damage-repair/toleration protein DRT100-like [Brassica rapa]	AT3G20820.1 Leucine-rich repeat (LRR) family protein
Bra002136	831	16.64	200.575	3.59141	Up	0.902028	-	-	-	-	gi|685376067|ref|XP_009121008.1|/8.75979e-164/PREDICTED: uncharacterized protein LOC103845864 isoform X1 [Brassica rapa]	AT5G18130.1 unknown protein; BEST Arabidopsis thaliana protein match is: unknown protein (TAIR:AT3G03870.2); Has 1807 Blast hits to 1807 proteins in 277 species: Archae - 0; Bacteria - 0; Metazoa - 736; Fungi - 347; Plants - 385; Viruses - 0; Other Eukaryotes - 339 (source: NCBI BLink).
Bra001078	1512	15.045	179.455	3.57627	Up	0.901241	K00517|1|2e-120|431|osa:4349111|[EC:1.14.-.-]	GO:0044464	GO:0016491//oxidoreductase activity;GO:0005506//iron ion binding	GO:0008152//metabolic process	gi|685287570|ref|XP_009134728.1|/0/PREDICTED: cytochrome P450 89A9 [Brassica rapa]	AT3G03470.1 cytochrome P450, family 87, subfamily A, polypeptide 9
Bra033972	201	4.53	53.67	3.56653	Up	0.882992	-	-	-	-	gi|674920610|emb|CDY12674.1|/9.39226e-30/BnaA02g13420D [Brassica napus]	AT1G67920.1 unknown protein; BEST Arabidopsis thaliana protein match is: unknown protein (TAIR:AT1G24600.1); Has 22 Blast hits to 22 proteins in 5 species: Archae - 0; Bacteria - 0; Metazoa - 0; Fungi - 0; Plants - 22; Viruses - 0; Other Eukaryotes - 0 (source: NCBI BLink).
Bra009105	834	1.27	14.975	3.55966	Up	0.825112	K00430|1|2e-129|459|aly:ARALYDRAFT_908444|peroxidase [EC:1.11.1.7]	GO:0005576//extracellular region;GO:0030312//external encapsulating structure	GO:0005506//iron ion binding;GO:0003824//catalytic activity;GO:0016209//antioxidant activity	GO:0008152//metabolic process;GO:0006950//response to stress	gi|685378794|ref|XP_009122142.1|/6.39341e-151/PREDICTED: LOW QUALITY PROTEIN: peroxidase P7 [Brassica rapa]	AT5G05340.1 Peroxidase superfamily protein
Bra031369	474	10.05	117.67	3.54948	Up	0.894709	-	-	-	-	gi|674911710|emb|CDY21344.1|/7.71118e-88/BnaA09g30830D [Brassica napus]	AT1G22160.1 Protein of unknown function (DUF581)
Bra021771	600	1.325	15.46	3.54448	Up	0.827655	K00676|1|1e-14|77.8|ppp:PHYPADRAFT_104139|ribosomal-protein-alanine N-acetyltransferase [EC:2.3.1.128]	-	GO:0016407//acetyltransferase activity	GO:0009725//response to hormone	gi|674873006|emb|CDY60956.1|/5.97167e-114/BnaA04g28860D [Brassica napus]	AT2G32030.1 Acyl-CoA N-acyltransferases (NAT) superfamily protein
Bra015419	216	17.765	203.95	3.52111	Up	0.899403	-	-	-	-	gi|685370884|ref|XP_009119163.1|/6.33915e-13/PREDICTED: cysteine-rich and transmembrane domain-containing protein A [Brassica rapa]	AT1G05340.1 unknown protein; FUNCTIONS IN: molecular_function unknown; INVOLVED IN: biological_process unknown; LOCATED IN: chloroplast; EXPRESSED IN: 14 plant structures; EXPRESSED DURING: 7 growth stages; BEST Arabidopsis thaliana protein match is: unknown protein (TAIR:AT2G32210.1); Has 189 Blast hits to 189 proteins in 27 species: Archae - 0; Bacteria - 0; Metazoa - 0; Fungi - 21; Plants - 16…
Bra009096	417	2.285	26.09	3.51323	Up	0.858015	-	-	-	-	gi|685378767|ref|XP_009122129.1|/2.68636e-73/PREDICTED: uncharacterized protein LOC103846875 [Brassica rapa]	AT5G05220.1 unknown protein; Has 30201 Blast hits to 17322 proteins in 780 species: Archae - 12; Bacteria - 1396; Metazoa - 17338; Fungi - 3422; Plants - 5037; Viruses - 0; Other Eukaryotes - 2996 (source: NCBI BLink).
Bra018807	981	2.48	27.77	3.48512	Up	0.860641	K13258|1|1e-53|207|gmx:547489|2-hydroxyisoflavanone dehydratase [EC:4.2.1.105];K14493|2|4e-24|110|ppp:PHYPADRAFT_118478|gibberellin receptor GID1 [EC:3.-.-.-]	-	GO:0016788//hydrolase activity, acting on ester bonds	-	gi|685314565|ref|XP_009147879.1|/5.74486e-173/PREDICTED: probable carboxylesterase 5 [Brassica rapa]	AT1G49660.1 carboxyesterase 5
Bra023510	363	2.43	27.115	3.48006	Up	0.859393	-	GO:0009536//plastid	-	-	gi|685270046|ref|XP_009126037.1|/2.51427e-49/PREDICTED: uncharacterized protein LOC103850974 [Brassica rapa]	AT5G15190.2 unknown protein; FUNCTIONS IN: molecular_function unknown; INVOLVED IN: biological_process unknown; LOCATED IN: chloroplast; EXPRESSED IN: 17 plant structures; EXPRESSED DURING: LP.04 four leaves visible, 4 anthesis, petal differentiation and expansion stage, E expanded cotyledon stage, D bilateral stage; Has 7 Blast hits to 7 proteins in 3 species: Archae - 0; Bacteria - 0; Metazoa -…
Bra025658	870	1.455	16.13	3.47066	Up	0.8301	-	GO:0043231//intracellular membrane-bounded organelle	GO:0042802//identical protein binding;GO:0003676//nucleic acid binding;GO:0001071//nucleic acid binding transcription factor activity;GO:0046983//protein dimerization activity	GO:0010260//organ senescence;GO:0006970//response to osmotic stress;GO:0010467//gene expression	gi|674958881|emb|CDX74442.1|/4.86882e-172/BnaA04g09470D [Brassica napus]	AT5G39610.1 NAC domain containing protein 6
Bra018486	282	22.615	250.685	3.47052	Up	0.900338	-	-	-	-	gi|685307569|ref|XP_009144499.1|/2.44881e-18/PREDICTED: uncharacterized protein LOC103868149 [Brassica rapa]	-
Bra010292	639	11.9	131.91	3.47052	Up	0.895595	K08235|1|7e-106|380|ath:AT4G30270|xyloglucan:xyloglucosyl transferase [EC:2.4.1.207];K14504|3|5e-100|361|aly:ARALYDRAFT_918931|xyloglucan:xyloglucosyl transferase TCH4 [EC:2.4.1.207]	GO:0005618//cell wall;GO:0005576//extracellular region;GO:0044424;GO:0016020//membrane	GO:0016798//hydrolase activity, acting on glycosyl bonds;GO:0016758//transferase activity, transferring hexosyl groups	GO:0044042//glucan metabolic process;GO:0010476//gibberellin mediated signaling pathway;GO:0009827//plant-type cell wall modification;GO:0032502//developmental process	gi|685345783|ref|XP_009108993.1|/9.84249e-127/PREDICTED: xyloglucan endotransglucosylase/hydrolase protein 24-like [Brassica rapa]	AT4G30270.1 xyloglucan endotransglucosylase/hydrolase 24
Bra030768	510	56.98	630.74	3.46852	Up	0.903292	-	GO:0005576//extracellular region	GO:0005488//binding	-	gi|685350671|ref|XP_009110834.1|/9.87878e-69/PREDICTED: uncharacterized protein LOC103836340 [Brassica rapa]	AT1G09310.1 Protein of unknown function, DUF538
Bra011422	3141	4.245	46.905	3.46591	Up	0.87925	K14157|1|0.0|1892|aly:ARALYDRAFT_491371|alpha-aminoadipic semialdehyde synthase [EC:1.5.1.8 1.5.1.9]	-	GO:0004753//saccharopine dehydrogenase activity	GO:0008152//metabolic process	gi|685257202|ref|XP_009124890.1|/0/PREDICTED: alpha-aminoadipic semialdehyde synthase isoform X2 [Brassica rapa]	AT4G33150.2 lysine-ketoglutarate reductase/saccharopine dehydrogenase bifunctional enzyme
Bra023665	831	7.205	77.6	3.42899	Up	0.886996	-	-	-	-	gi|685270437|ref|XP_009126240.1|/1.15398e-162/PREDICTED: uncharacterized protein LOC103851161 [Brassica rapa]	AT5G18130.1 unknown protein; BEST Arabidopsis thaliana protein match is: unknown protein (TAIR:AT3G03870.2); Has 1807 Blast hits to 1807 proteins in 277 species: Archae - 0; Bacteria - 0; Metazoa - 736; Fungi - 347; Plants - 385; Viruses - 0; Other Eukaryotes - 339 (source: NCBI BLink).
Bra036210	768	5.63	60.485	3.42537	Up	0.882631	-	-	GO:0005488//binding	-	gi|674913141|emb|CDY19988.1|/1.36941e-120/BnaA09g02630D [Brassica napus]	AT3G29575.4 ABI five binding protein 3
Bra024556	444	3.395	36.36	3.42087	Up	0.869059	K07213|1|7e-08|54.3|sbi:SORBI_08g022260|copper chaperone	-	GO:0043169//cation binding	GO:0006812//cation transport	gi|685362482|ref|XP_009115570.1|/4.25017e-76/PREDICTED: heavy metal-associated isoprenylated plant protein 26 [Brassica rapa]	AT1G22990.1 Heavy metal transport/detoxification superfamily protein
Bra023817	510	2.815	30.065	3.41688	Up	0.861609	-	GO:0031224//intrinsic component of membrane	-	GO:0051179//localization	gi|685264244|ref|XP_009108758.1|/7.95222e-69/PREDICTED: non-specific lipid-transfer protein-like protein At2g13820 [Brassica rapa]	AT3G22600.1 Bifunctional inhibitor/lipid-transfer protein/seed storage 2S albumin superfamily protein
Bra037985	561	1.5	15.915	3.40735	Up	0.826441	-	GO:0044464	-	GO:0006950//response to stress;GO:0009699//phenylpropanoid biosynthetic process	gi|685313849|ref|XP_009147520.1|/4.43985e-97/PREDICTED: dirigent protein 20-like [Brassica rapa]	AT1G55210.2 Disease resistance-responsive (dirigent-like protein) family protein
Bra011722	774	31.1	329.835	3.40676	Up	0.899271	K08233|1|1e-114|410|ath:AT4G37150|polyneuridine-aldehyde esterase [EC:3.1.1.78]	-	-	GO:0006725//cellular aromatic compound metabolic process;GO:0031407//oxylipin metabolic process;GO:0009814//defense response, incompatible interaction;GO:0050832//defense response to fungus	gi|685256421|ref|XP_009140147.1|/1.47394e-150/PREDICTED: methylesterase 9-like [Brassica rapa]	AT4G37150.1 methyl esterase 9
Bra019052	903	7.795	81.26	3.38192	Up	0.887242	-	GO:0043231//intracellular membrane-bounded organelle	GO:0003676//nucleic acid binding;GO:0001071//nucleic acid binding transcription factor activity	GO:0009725//response to hormone;GO:0006950//response to stress;GO:0010467//gene expression	gi|685293530|ref|XP_009137656.1|/7.72001e-164/PREDICTED: NAC domain-containing protein 72 [Brassica rapa]	AT4G27410.2 NAC (No Apical Meristem) domain transcriptional regulator superfamily protein
Bra031860	702	1.435	14.86	3.37231	Up	0.820976	-	GO:0042579//microbody	-	-	gi|685279155|ref|XP_009130510.1|/9.6853e-135/PREDICTED: ovarian cancer-associated gene 2 protein homolog [Brassica rapa]	AT5G65400.1 alpha/beta-Hydrolases superfamily protein
Bra006288	348	17.345	177.135	3.35226	Up	0.895497	-	GO:0009536//plastid	-	-	gi|685281089|ref|XP_009131448.1|/3.84546e-50/PREDICTED: uncharacterized protein LOC103856121 [Brassica rapa]	AT5G15190.2 unknown protein; FUNCTIONS IN: molecular_function unknown; INVOLVED IN: biological_process unknown; LOCATED IN: chloroplast; EXPRESSED IN: 17 plant structures; EXPRESSED DURING: LP.04 four leaves visible, 4 anthesis, petal differentiation and expansion stage, E expanded cotyledon stage, D bilateral stage; Has 7 Blast hits to 7 proteins in 3 species: Archae - 0; Bacteria - 0; Metazoa -…
Bra012885	612	8.075	81.69	3.33863	Up	0.887144	-	GO:0031090//organelle membrane	-	GO:0050896//response to stimulus	gi|685291227|ref|XP_009136563.1|/8.71183e-113/PREDICTED: cold-regulated 413 plasma membrane protein 2 [Brassica rapa]	AT3G50830.1 cold-regulated 413-plasma membrane 2
Bra039260	282	1.43	14.425	3.33448	Up	0.818597	-	GO:0019866//organelle inner membrane;GO:0005758//mitochondrial intermembrane space	GO:0043169//cation binding;GO:0008320//protein transmembrane transporter activity	GO:0006612//protein targeting to membrane;GO:0003006//developmental process involved in reproduction	gi|685384354|ref|XP_009124342.1|/9.45597e-49/PREDICTED: mitochondrial import inner membrane translocase subunit TIM9-like [Brassica rapa]	AT3G46560.1 Tim10/DDP family zinc finger protein
Bra040704	1104	3.655	36.765	3.33039	Up	0.868879	-	-	GO:0008081//phosphoric diester hydrolase activity	GO:0019400	gi|685385815|ref|XP_009124822.1|/0/PREDICTED: glycerophosphodiester phosphodiesterase GDE1 [Brassica rapa]	AT3G02040.1 senescence-related gene 3
Bra014401	492	31.14	306.12	3.29726	Up	0.89704	K06674|1|3e-06|48.9|vcn:VOLCADRAFT_106052|structural maintenance of chromosome 2	GO:0043231//intracellular membrane-bounded organelle	-	GO:0050896//response to stimulus	gi|685295718|ref|XP_009138726.1|/2.26685e-91/PREDICTED: universal stress protein A-like protein [Brassica rapa]	AT3G62550.1 Adenine nucleotide alpha hydrolases-like superfamily protein
Bra016591	837	4.6	44.875	3.28621	Up	0.873622	K13248|1|2e-145|513|aly:ARALYDRAFT_889181|pyridoxal phosphate phosphatase PHOSPHO2 [EC:3.1.3.74]	GO:0044464	GO:0042578//phosphoric ester hydrolase activity;GO:0016462//pyrophosphatase activity	GO:0007165//signal transduction;GO:0051259//protein oligomerization;GO:0006796//phosphate-containing compound metabolic process;GO:0009267//cellular response to starvation	gi|685349604|ref|XP_009110395.1|/5.70684e-163/PREDICTED: inorganic pyrophosphatase 2-like [Brassica rapa]	AT1G17710.1 Pyridoxal phosphate phosphatase-related protein
Bra022719	882	1.5	14.585	3.28145	Up	0.817415	K03183|1|4e-07|53.5|aly:ARALYDRAFT_472598|ubiquinone/menaquinone biosynthesis methyltransferase [EC:2.1.1.163 2.1.1.201]	GO:0031090//organelle membrane	GO:0016741	GO:0006730//one-carbon metabolic process	gi|674904217|emb|CDY28772.1|/2.523e-136/BnaA02g09640D [Brassica napus]	AT5G54400.1 S-adenosyl-L-methionine-dependent methyltransferases superfamily protein
Bra030771	1308	13.495	131.19	3.28116	Up	0.891115	K10590|1|2e-07|55.1|smo:SELMODRAFT_149458|E3 ubiquitin-protein ligase TRIP12 [EC:6.3.2.19]	GO:0044424	-	GO:0051701//interaction with host;GO:0009608//response to symbiont;GO:0006886//intracellular protein transport	gi|674900813|emb|CDY32165.1|/8.2715e-108/BnaCnng06740D [Brassica napus]	AT1G09270.2 importin alpha isoform 4
Bra035205	939	4.345	42.1	3.27639	Up	0.871767	K15109|1|1e-139|493|aly:ARALYDRAFT_896009|solute carrier family 25 (mitochondrial carnitine/acylcarnitine transporter), member 20/29	GO:0031224//intrinsic component of membrane;GO:0043231//intracellular membrane-bounded organelle;GO:0019866//organelle inner membrane	GO:0015179//L-amino acid transmembrane transporter activity	GO:0006970//response to osmotic stress;GO:0015809//arginine transport;GO:0006560//proline metabolic process;GO:0046907//intracellular transport	gi|674945786|emb|CDX87281.1|/1.96513e-164/BnaA07g35920D [Brassica napus]	AT1G79900.1 Mitochondrial substrate carrier family protein
Bra031521	2034	7.405	71.595	3.27329	Up	0.883156	-	GO:0043234//protein complex	GO:0046914//transition metal ion binding;GO:0019787//small conjugating protein transferase activity	GO:0032446//protein modification by small protein conjugation	gi|685263245|ref|XP_009103681.1|/0/PREDICTED: U-box domain-containing protein 19 [Brassica rapa]	AT1G60190.1 ARM repeat superfamily protein
Bra035561	1383	5.625	54.35	3.27236	Up	0.878151	K14489|1|1e-19|96.3|vvi:100263145|arabidopsis histidine kinase 2/3/4 (cytokinin receptor) [EC:2.7.13.3]	GO:0044464	GO:0016798//hydrolase activity, acting on glycosyl bonds;GO:0043167//ion binding	GO:0044238	gi|685271933|ref|XP_009127020.1|/0/PREDICTED: glucan endo-1,3-beta-glucosidase 13-like isoform X2 [Brassica rapa]	AT5G55180.1 O-Glycosyl hydrolases family 17 protein
Bra033746	1239	4.485	43.105	3.26468	Up	0.872243	K12448|1|0.0|756|aly:ARALYDRAFT_683697|UDP-arabinose 4-epimerase [EC:5.1.3.5]	-	GO:0048037//cofactor binding;GO:0016857//racemase and epimerase activity, acting on carbohydrates and derivatives	GO:0019318//hexose metabolic process;GO:0006139//nucleobase-containing compound metabolic process	gi|674883437|emb|CDY49015.1|/0/BnaAnng10090D [Brassica napus]	AT5G44480.1 NAD(P)-binding Rossmann-fold superfamily protein
Bra000963	2919	3.22	30.87	3.26107	Up	0.860312	-	-	-	-	gi|685287212|ref|XP_009134537.1|/0/PREDICTED: LOW QUALITY PROTEIN: uncharacterized protein LOC103858859 [Brassica rapa]	AT4G00700.1 C2 calcium/lipid-binding plant phosphoribosyltransferase family protein
Bra005474	1056	1.31	12.51	3.25544	Up	0.805058	-	GO:0016020//membrane	GO:0015205//nucleobase transmembrane transporter activity	GO:0015851//nucleobase transport	gi|685306209|ref|XP_009143832.1|/0/PREDICTED: purine permease 2 isoform X1 [Brassica rapa]	AT2G33750.2 purine permease 2
Bra036282	2436	2.33	22.045	3.24205	Up	0.843442	K00695|1|0.0|1592|ath:AT4G02280|sucrose synthase [EC:2.4.1.13]	-	GO:0035251//UDP-glucosyltransferase activity	GO:0005985//sucrose metabolic process;GO:0006073//cellular glucan metabolic process;GO:0048316//seed development	gi|685351804|ref|XP_009111303.1|/0/PREDICTED: sucrose synthase 3 [Brassica rapa]	AT4G02280.1 sucrose synthase 3
Bra001953	594	19.995	187.705	3.23076	Up	0.894053	-	GO:0043231//intracellular membrane-bounded organelle;GO:0016020//membrane	-	GO:0009414//response to water deprivation;GO:0009725//response to hormone;GO:0009409//response to cold	gi|674882853|emb|CDY49552.1|/7.78701e-86/BnaA07g03740D [Brassica napus]	AT2G15970.1 cold regulated 413 plasma membrane 1
Bra002180	408	2.34	21.885	3.22536	Up	0.842786	-	-	-	-	gi|674941074|emb|CDX92588.1|/9.08995e-20/BnaA10g16270D [Brassica napus]	AT5G18690.1 arabinogalactan protein 25
Bra014247	909	1.99	18.555	3.22097	Up	0.833809	K01931|1|2e-18|91.3|ppp:PHYPADRAFT_182911|protein neuralized [EC:6.3.2.19];K15688|3|2e-07|54.7|smo:SELMODRAFT_231449|E3 ubiquitin-protein ligase MUL1 [EC:6.3.2.19]	-	GO:0046872//metal ion binding	-	gi|685340931|ref|XP_009107223.1|/7.06003e-167/PREDICTED: putative E3 ubiquitin-protein ligase XBAT34 isoform X1 [Brassica rapa]	AT4G14365.1 XB3 ortholog 4 in Arabidopsis thaliana
Bra040833	516	4.02	37.42	3.21854	Up	0.867353	-	GO:0031224//intrinsic component of membrane	GO:0005488//binding	GO:0010876//lipid localization	gi|685309381|ref|XP_009145309.1|/1.86056e-71/PREDICTED: non-specific lipid-transfer protein-like protein At2g13820 isoform X1 [Brassica rapa]	AT3G22600.1 Bifunctional inhibitor/lipid-transfer protein/seed storage 2S albumin superfamily protein
Bra012360	1263	1.38	12.785	3.21171	Up	0.806485	-	GO:0009536//plastid	-	-	gi|674907275|emb|CDY25769.1|/0/BnaA07g10130D [Brassica napus]	AT1G23110.4 unknown protein; FUNCTIONS IN: molecular_function unknown; LOCATED IN: chloroplast; BEST Arabidopsis thaliana protein match is: unknown protein (TAIR:AT1G70900.1).
Bra007686	1824	2.715	24.895	3.19683	Up	0.849514	-	-	-	GO:0044238	gi|685365630|ref|XP_009116919.1|/0/PREDICTED: uncharacterized protein LOC103842065 [Brassica rapa]	AT3G62590.1 alpha/beta-Hydrolases superfamily protein
Bra007333	2295	8.955	80.29	3.16445	Up	0.883156	K06617|1|0.0|1486|ath:AT3G57520|raffinose synthase [EC:2.4.1.82]	-	-	GO:0009628//response to abiotic stimulus	gi|685364536|ref|XP_009116453.1|/0/PREDICTED: probable galactinol--sucrose galactosyltransferase 2 [Brassica rapa]	AT3G57520.1 seed imbibition 2
Bra033745	549	1.455	12.985	3.15775	Up	0.805829	K13448|1|9e-75|276|ath:AT5G44460|calcium-binding protein CML	-	GO:0046872//metal ion binding	GO:0000904//cell morphogenesis involved in differentiation;GO:0010038//response to metal ion	gi|685326651|ref|XP_009101708.1|/8.33648e-90/PREDICTED: probable calcium-binding protein CML43 [Brassica rapa]	AT5G44460.1 calmodulin like 43
Bra027715	1218	19.47	172.065	3.14363	Up	0.891279	K01761|1|0.0|752|aly:ARALYDRAFT_681961|methionine-gamma-lyase [EC:4.4.1.11]	GO:0044444	GO:0016765//transferase activity, transferring alkyl or aryl (other than methyl) groups;GO:0048037//cofactor binding;GO:0016846//carbon-sulfur lyase activity	GO:0009087//methionine catabolic process	gi|685355756|ref|XP_009112857.1|/0/PREDICTED: methionine gamma-lyase [Brassica rapa]	AT1G64660.1 methionine gamma-lyase
Bra013088	222	84.27	744.725	3.14362	Up	0.897318	-	-	-	-	gi|685290656|ref|XP_009136290.1|/2.0645e-35/PREDICTED: uncharacterized protein LOC103860440 [Brassica rapa]	AT2G15960.1 unknown protein; Has 14 Blast hits to 14 proteins in 5 species: Archae - 0; Bacteria - 0; Metazoa - 0; Fungi - 0; Plants - 14; Viruses - 0; Other Eukaryotes - 0 (source: NCBI BLink).
Bra014739	783	4.375	38.13	3.12357	Up	0.865646	-	GO:0005618//cell wall	-	GO:0000902//cell morphogenesis;GO:0009827//plant-type cell wall modification	gi|685296652|ref|XP_009139160.1|/1.50006e-129/PREDICTED: expansin-A16-like [Brassica rapa]	AT3G55500.1 expansin A16
Bra019961	513	2.815	24.52	3.12275	Up	0.846528	-	GO:0016020//membrane	-	-	gi|685315431|ref|XP_009148336.1|/5.74046e-58/PREDICTED: uncharacterized protein LOC103871789 [Brassica rapa]	AT1G10140.1 Uncharacterised conserved protein UCP031279
Bra016441	732	2.89	25.08	3.1174	Up	0.847709	-	-	-	-	gi|685349081|ref|XP_009110201.1|/7.16928e-143/PREDICTED: uncharacterized protein LOC103835766 [Brassica rapa]	AT1G21000.2 PLATZ transcription factor family protein
Bra026353	903	6.49	56.035	3.11004	Up	0.876231	-	GO:0043231//intracellular membrane-bounded organelle	GO:0003676//nucleic acid binding;GO:0001071//nucleic acid binding transcription factor activity	GO:0009725//response to hormone;GO:0006950//response to stress;GO:0010467//gene expression	gi|674944067|emb|CDX89253.1|/5.57566e-164/BnaA01g16400D [Brassica napus]	AT4G27410.2 NAC (No Apical Meristem) domain transcriptional regulator superfamily protein
Bra017670	801	3.52	30.2	3.1009	Up	0.85644	-	GO:0031981//nuclear lumen	GO:0046914//transition metal ion binding;GO:0003677//DNA binding;GO:0001071//nucleic acid binding transcription factor activity	GO:0006351//transcription, DNA-templated;GO:0048511//rhythmic process	gi|674887325|emb|CDY45326.1|/4.60482e-155/BnaA03g52990D [Brassica napus]	AT4G34680.2 GATA transcription factor 3
Bra002975	393	45.845	391.245	3.09324	Up	0.895349	-	-	-	-	gi|685372972|ref|XP_009119983.1|/1.1593e-45/PREDICTED: uncharacterized protein LOC103844912 isoform X1 [Brassica rapa]	AT5G54585.1 unknown protein; Has 30201 Blast hits to 17322 proteins in 780 species: Archae - 12; Bacteria - 1396; Metazoa - 17338; Fungi - 3422; Plants - 5037; Viruses - 0; Other Eukaryotes - 2996 (source: NCBI BLink).
Bra040092	546	6.185	52.52	3.08602	Up	0.874639	K09286|1|9e-35|144|vvi:100252531|EREBP-like factor	GO:0043231//intracellular membrane-bounded organelle	GO:0003676//nucleic acid binding;GO:0001071//nucleic acid binding transcription factor activity	GO:0032501//multicellular organismal process;GO:0006351//transcription, DNA-templated;GO:0003006//developmental process involved in reproduction;GO:0009832//plant-type cell wall biogenesis	gi|685261478|ref|XP_009145506.1|/1.04477e-87/PREDICTED: ethylene-responsive transcription factor ERF039-like [Brassica rapa]	AT4G16750.1 Integrase-type DNA-binding superfamily protein
Bra037506	969	37.32	315.47	3.07948	Up	0.894397	K15450|1|8e-19|92.4|gmx:100816336|tRNA wybutosine-synthesizing protein 3 [EC:2.1.1.-]	-	-	GO:0044271//cellular nitrogen compound biosynthetic process;GO:0019759	gi|674947169|emb|CDX86322.1|/0/BnaA06g30390D [Brassica napus]	AT5G48180.1 nitrile specifier protein 5
Bra013087	594	66.375	560.755	3.07866	Up	0.896219	-	GO:0043231//intracellular membrane-bounded organelle;GO:0016020//membrane	-	GO:0009414//response to water deprivation;GO:0009725//response to hormone;GO:0009409//response to cold	gi|688953714|ref|NP_001288966.1|/4.25556e-98/cold-regulated 413 plasma membrane protein 1-like [Brassica rapa]	AT2G15970.1 cold regulated 413 plasma membrane 1
Bra004062	201	10.505	88.52	3.07493	Up	0.883681	-	-	-	-	gi|674872949|emb|CDY61038.1|/3.20125e-30/BnaA07g38570D [Brassica napus]	AT1G67920.1 unknown protein; BEST Arabidopsis thaliana protein match is: unknown protein (TAIR:AT1G24600.1); Has 22 Blast hits to 22 proteins in 5 species: Archae - 0; Bacteria - 0; Metazoa - 0; Fungi - 0; Plants - 22; Viruses - 0; Other Eukaryotes - 0 (source: NCBI BLink).
Bra011209	228	9.26	77.545	3.06595	Up	0.881696	-	GO:0044464	-	GO:0006972//hyperosmotic response	gi|674904807|emb|CDY28201.1|/9.39855e-25/BnaA01g06480D [Brassica napus]	AT4G30660.2 Low temperature and salt responsive protein family
Bra020017	1485	2.46	20.515	3.05995	Up	0.836583	K12126|1|0.0|704|aly:ARALYDRAFT_471048|phytochrome-interacting factor 3;K13422|3|1e-07|56.2|rcu:RCOM_0864470|transcription factor MYC2;K10863|4|2e-07|55.8|aly:ARALYDRAFT_486946|aprataxin [EC:3.-.-.-]	GO:0043231//intracellular membrane-bounded organelle	GO:0003676//nucleic acid binding;GO:0001071//nucleic acid binding transcription factor activity;GO:0005515//protein binding	GO:0009416//response to light stimulus;GO:0031325//positive regulation of cellular metabolic process;GO:0010476//gibberellin mediated signaling pathway	gi|685315262|ref|XP_009148251.1|/0/PREDICTED: transcription factor PIF3 isoform X2 [Brassica rapa]	AT1G09530.2 phytochrome interacting factor 3
Bra036546	1164	5.595	46.44	3.05316	Up	0.871193	-	GO:0044464	-	GO:0009725//response to hormone;GO:0006970//response to osmotic stress	gi|685352714|ref|XP_009111670.1|/0/PREDICTED: dehydration-responsive protein RD22-like [Brassica rapa]	AT5G25610.1 BURP domain-containing protein
Bra020405	258	7.115	58.215	3.03246	Up	0.876526	-	-	-	-	gi|674900300|emb|CDY32740.1|/1.46803e-12/BnaA02g08020D [Brassica napus]	-
Bra000115	981	14.06	114.31	3.02328	Up	0.886438	-	-	-	-	gi|685284860|ref|XP_009133334.1|/4.32617e-144/PREDICTED: extensin-2 isoform X1 [Brassica rapa]	AT2G39050.1 hydroxyproline-rich glycoprotein family protein
Bra006103	1359	33.08	266.375	3.00943	Up	0.893068	K14454|1|0.0|863|aly:ARALYDRAFT_487989|aspartate aminotransferase, cytoplasmic [EC:2.6.1.1]	GO:0042579//microbody	GO:0008483//transaminase activity;GO:0048037//cofactor binding	GO:0019752//carboxylic acid metabolic process	gi|674954848|emb|CDX78428.1|/0/BnaA03g03400D [Brassica napus]	AT5G11520.1 aspartate aminotransferase 3
Bra013154	1596	11.955	96.165	3.0079	Up	0.88419	-	-	-	-	gi|685290485|ref|XP_009136203.1|/0/PREDICTED: uncharacterized protein LOC103860363 [Brassica rapa]	AT2G12400.1 unknown protein; FUNCTIONS IN: molecular_function unknown; INVOLVED IN: biological_process unknown; LOCATED IN: endomembrane system; EXPRESSED IN: 25 plant structures; EXPRESSED DURING: 13 growth stages; BEST Arabidopsis thaliana protein match is: unknown protein (TAIR:AT2G25270.1); Has 177 Blast hits to 172 proteins in 23 species: Archae - 0; Bacteria - 2; Metazoa - 3; Fungi - 0; Pla…
Bra021558	1797	6.22	49.525	2.99317	Up	0.870635	K09840|1|0.0|1046|ath:AT3G14440|9-cis-epoxycarotenoid dioxygenase [EC:1.13.11.51]	GO:0009532//plastid stroma;GO:0009534//chloroplast thylakoid	GO:0010436//carotenoid dioxygenase activity	GO:0009687//abscisic acid metabolic process;GO:0006972//hyperosmotic response	gi|685265823|ref|XP_009116867.1|/0/PREDICTED: 9-cis-epoxycarotenoid dioxygenase NCED3, chloroplastic [Brassica rapa]	AT3G14440.1 nine-cis-epoxycarotenoid dioxygenase 3
Bra007348	1488	10.935	87.005	2.99215	Up	0.881138	-	GO:0009534//chloroplast thylakoid	GO:0070011//peptidase activity, acting on L-amino acid peptides	GO:0019538//protein metabolic process;GO:0007165//signal transduction	gi|685364581|ref|XP_009116472.1|/0/PREDICTED: carboxyl-terminal-processing peptidase 3, chloroplastic [Brassica rapa]	AT3G57680.1 Peptidase S41 family protein
Bra019200	399	17.765	139.79	2.97615	Up	0.886684	-	-	-	GO:0009725//response to hormone;GO:0006972//hyperosmotic response;GO:0009791//post-embryonic development;GO:0048229//gametophyte development;GO:0006914//autophagy	gi|685293141|ref|XP_009137485.1|/3.65302e-63/PREDICTED: HVA22-like protein d [Brassica rapa]	AT4G24960.1 HVA22 homologue D
Bra006893	1032	8.15	63.775	2.96812	Up	0.875968	-	GO:0044464	GO:0008194//UDP-glycosyltransferase activity	-	gi|685363256|ref|XP_009115908.1|/6.09643e-168/PREDICTED: uncharacterized protein LOC103841140 [Brassica rapa]	AT3G52060.2 Core-2/I-branching beta-1,6-N-acetylglucosaminyltransferase family protein
Bra027336	1794	3.735	29.175	2.96555	Up	0.851845	K09840|1|0.0|1063|ath:AT3G14440|9-cis-epoxycarotenoid dioxygenase [EC:1.13.11.51]	GO:0009532//plastid stroma;GO:0009534//chloroplast thylakoid	GO:0010436//carotenoid dioxygenase activity	GO:0009687//abscisic acid metabolic process;GO:0006972//hyperosmotic response	gi|685311602|ref|XP_009146365.1|/0/PREDICTED: 9-cis-epoxycarotenoid dioxygenase NCED3, chloroplastic [Brassica rapa]	AT3G14440.1 nine-cis-epoxycarotenoid dioxygenase 3
Bra025261	846	14.535	112.97	2.95834	Up	0.884157	-	-	-	-	gi|685324814|ref|XP_009151979.1|/1.64329e-151/PREDICTED: uncharacterized protein LOC103875234 [Brassica rapa]	AT3G27250.1 unknown protein; BEST Arabidopsis thaliana protein match is: unknown protein (TAIR:AT5G40800.1); Has 104 Blast hits to 104 proteins in 13 species: Archae - 0; Bacteria - 0; Metazoa - 0; Fungi - 0; Plants - 104; Viruses - 0; Other Eukaryotes - 0 (source: NCBI BLink).
Bra009003	1305	7.26	56.265	2.9542	Up	0.873228	K00924|1|2e-126|450|ath:AT1G30270|[EC:2.7.1.-];K07198|3|9e-72|268|gmx:100806916|5'-AMP-activated protein kinase, catalytic alpha subunit [EC:2.7.11.11]	-	GO:0004672//protein kinase activity;GO:0032559	GO:0006952//defense response;GO:0006464//cellular protein modification process;GO:0023052//signaling	gi|685378488|ref|XP_009122012.1|/0/PREDICTED: CBL-interacting serine/threonine-protein kinase 5 [Brassica rapa]	AT5G10930.1 CBL-interacting protein kinase 5
Bra020898	885	9.6	74.37	2.95361	Up	0.878233	-	GO:0044464	-	-	gi|685344481|ref|XP_009108493.1|/1.65661e-169/PREDICTED: transmembrane protein 184 homolog DDB_G0279555-like [Brassica rapa]	AT4G21570.1 Protein of unknown function (DUF300)
Bra006350	1656	4.64	35.585	2.93907	Up	0.859738	K00666|1|2e-141|501|sbi:SORBI_10g012080|fatty-acyl-CoA synthase [EC:6.2.1.-];K01904|2|1e-48|192|ath:AT3G21240|4-coumarate--CoA ligase [EC:6.2.1.12]	GO:0042579//microbody	-	GO:0019941//modification-dependent protein catabolic process	gi|685281256|ref|XP_009131535.1|/0/PREDICTED: probable acyl-activating enzyme 5, peroxisomal [Brassica rapa]	AT5G16370.1 acyl activating enzyme 5
Bra013777	1173	4.43	33.83	2.93292	Up	0.857391	-	-	-	-	gi|674898582|emb|CDY34267.1|/0/BnaA01g13700D [Brassica napus]	AT4G24220.1 NAD(P)-binding Rossmann-fold superfamily protein
Bra001806	927	2.645	20.09	2.92514	Up	0.832037	K08064|1|3e-31|133|gmx:100782085|nuclear transcription factor Y, alpha	GO:0005667//transcription factor complex	GO:0003676//nucleic acid binding;GO:0001071//nucleic acid binding transcription factor activity	GO:0006351//transcription, DNA-templated	gi|685289540|ref|XP_009135715.1|/0/PREDICTED: nuclear transcription factor Y subunit A-9-like isoform X1 [Brassica rapa]	AT3G20910.1 nuclear factor Y, subunit A9
Bra006025	825	2.04	15.41	2.91723	Up	0.814002	-	GO:0044464	-	-	gi|685280414|ref|XP_009131114.1|/8.44515e-13/PREDICTED: periaxin-like [Brassica rapa]	AT5G09530.1 hydroxyproline-rich glycoprotein family protein
Bra004771	849	200.675	1513.83	2.91527	Up	0.89489	K01183|1|1e-61|234|vvi:100250948|chitinase [EC:3.2.1.14]	GO:0005618//cell wall;GO:0005576//extracellular region	GO:0004553//hydrolase activity, hydrolyzing O-glycosyl compounds;GO:0030247//polysaccharide binding	GO:0006026	gi|442774694|gb|AGC73657.1|/1.27675e-145/chitinase 1 [Brassica rapa subsp. pekinensis]	AT2G43570.1 chitinase, putative
Bra040164	1578	2.005	15.075	2.91048	Up	0.812196	K13783|1|0.0|861|ath:AT4G17550|MFS transporter, OPA family, solute carrier family 37 (glycerol-3-phosphate transporter), member 1/2	GO:0031090//organelle membrane	-	GO:0071702	gi|685258371|ref|XP_009130736.1|/0/PREDICTED: putative glycerol-3-phosphate transporter 4 [Brassica rapa]	AT4G17550.1 Major facilitator superfamily protein
Bra018611	1089	16.14	121.175	2.90838	Up	0.884453	K01620|1|2e-179|626|ath:AT1G08630|threonine aldolase [EC:4.1.2.5]	-	GO:0048037//cofactor binding;GO:0016832//aldehyde-lyase activity	GO:0006566//threonine metabolic process	gi|685315011|ref|XP_009148115.1|/0/PREDICTED: probable low-specificity L-threonine aldolase 1 [Brassica rapa]	AT1G08630.4 threonine aldolase 1
Bra013606	1290	14.935	111.805	2.90422	Up	0.883599	-	GO:0016020//membrane	-	GO:0050794//regulation of cellular process;GO:0040007//growth	gi|674950664|emb|CDX82928.1|/0/BnaC01g13780D [Brassica napus]	AT4G22270.1 Protein of unknown function (DUF3537)
Bra004385	813	5.265	39.22	2.89708	Up	0.862659	-	GO:0043231//intracellular membrane-bounded organelle	GO:0003676//nucleic acid binding;GO:0001071//nucleic acid binding transcription factor activity	GO:0010260//organ senescence;GO:0016049//cell growth;GO:0009791//post-embryonic development	gi|674937279|emb|CDX95931.1|/5.68312e-161/BnaA07g28000D [Brassica napus]	AT1G69490.1 NAC-like, activated by AP3/PI
Bra031636	1077	3.525	25.95	2.88004	Up	0.845133	K01620|1|0.0|682|aly:ARALYDRAFT_470930|threonine aldolase [EC:4.1.2.5]	-	GO:0048037//cofactor binding;GO:0016832//aldehyde-lyase activity	GO:0006566//threonine metabolic process	gi|685368943|ref|XP_009118358.1|/0/PREDICTED: probable low-specificity L-threonine aldolase 1 [Brassica rapa]	AT1G08630.4 threonine aldolase 1
Bra040082	288	8.68	63.69	2.8753	Up	0.875049	-	-	-	-	gi|674886167|emb|CDY46434.1|/1.88015e-45/BnaA08g19960D [Brassica napus]	-
Bra030906	1515	25.18	183.795	2.86775	Up	0.88803	K14085|1|0.0|931|ath:AT1G54100|aldehyde dehydrogenase family 7 member A1 [EC:1.2.1.31 1.2.1.8 1.2.1.3]	-	GO:0004030//aldehyde dehydrogenase [NAD(P)+] activity	GO:0009725//response to hormone;GO:0044237//cellular metabolic process;GO:0009414//response to water deprivation;GO:0006970//response to osmotic stress	gi|674872640|emb|CDY61473.1|/0/BnaC03g78230D [Brassica napus]	AT1G54100.2 aldehyde dehydrogenase 7B4
Bra030034	597	2.51	18.29	2.8653	Up	0.825555	-	-	-	-	gi|685329930|ref|XP_009102991.1|/1.68734e-83/PREDICTED: uncharacterized protein LOC103829075 [Brassica rapa]	AT1G27300.1 unknown protein; Has 54 Blast hits to 54 proteins in 19 species: Archae - 0; Bacteria - 0; Metazoa - 11; Fungi - 6; Plants - 34; Viruses - 0; Other Eukaryotes - 3 (source: NCBI BLink).
Bra005367	288	3.485	25.38	2.86446	Up	0.843754	-	-	-	-	gi|674893114|emb|CDY39679.1|/9.18729e-41/BnaA04g13960D [Brassica napus]	-
Bra010731	957	16.205	117.715	2.86079	Up	0.883796	-	-	GO:0004620//phospholipase activity;GO:0042578//phosphoric ester hydrolase activity	GO:0044238;GO:0007165//signal transduction	gi|674943240|emb|CDX90289.1|/0/BnaA08g16950D [Brassica napus]	AT4G38690.1 PLC-like phosphodiesterases superfamily protein
Bra024374	1293	4.055	29.45	2.86049	Up	0.850991	-	GO:0044425//membrane part	-	-	gi|674924532|emb|CDY08803.1|/0/BnaA06g24210D [Brassica napus]	AT5G65280.1 GCR2-like 1
Bra017912	1419	7.38	53.495	2.85771	Up	0.871275	K00166|1|0.0|874|ath:AT1G21400|2-oxoisovalerate dehydrogenase E1 component, alpha subunit [EC:1.2.4.4]	-	GO:0016903//oxidoreductase activity, acting on the aldehyde or oxo group of donors	-	gi|674882118|emb|CDY50237.1|/0/BnaA06g15140D [Brassica napus]	AT1G21400.1 Thiamin diphosphate-binding fold (THDP-binding) superfamily protein
Bra010049	909	4.94	35.62	2.8501	Up	0.858622	-	-	GO:0003677//DNA binding;GO:0001071//nucleic acid binding transcription factor activity	GO:0006351//transcription, DNA-templated;GO:0009743//response to carbohydrate	gi|685323156|ref|XP_009151322.1|/1.13272e-147/PREDICTED: heat stress transcription factor B-2a [Brassica rapa]	AT5G62020.1 heat shock transcription factor B2A
Bra017059	1047	5.1	36.66	2.84564	Up	0.859722	-	GO:0005618//cell wall	-	GO:0000902//cell morphogenesis;GO:0009827//plant-type cell wall modification	gi|685302235|ref|XP_009141827.1|/5.46863e-134/PREDICTED: expansin-A4-like [Brassica rapa]	AT2G39700.1 expansin A4
Bra008661	198	57.49	413.165	2.84534	Up	0.891936	-	GO:0016020//membrane;GO:0009536//plastid	-	GO:0009725//response to hormone;GO:0009409//response to cold;GO:0007165//signal transduction	gi|674906620|emb|CDY26479.1|/8.69002e-20/BnaC09g41890D [Brassica napus]	AT5G15970.1 stress-responsive protein (KIN2) / stress-induced protein (KIN2) / cold-responsive protein (COR6.6) / cold-regulated protein (COR6.6)
Bra040111	1023	4.4	31.14	2.82319	Up	0.852682	K10848|1|2e-136|483|vvi:100247853|DNA excision repair protein ERCC-4 [EC:3.1.-.-]	-	GO:0016859//cis-trans isomerase activity	GO:0044267//cellular protein metabolic process;GO:0006950//response to stress	gi|685261412|ref|XP_009145213.1|/0/PREDICTED: uncharacterized protein LOC103868909 [Brassica rapa]	AT4G17070.1 peptidyl-prolyl cis-trans isomerases
Bra033604	1572	42.805	300.375	2.81091	Up	0.890065	K00975|1|0.0|969|ath:AT4G39210|glucose-1-phosphate adenylyltransferase [EC:2.7.7.27]	GO:0043234//protein complex;GO:0009536//plastid	GO:0070566//adenylyltransferase activity	GO:0005982//starch metabolic process;GO:0005977//glycogen metabolic process	gi|685327102|ref|XP_009101892.1|/0/PREDICTED: glucose-1-phosphate adenylyltransferase large subunit 3, chloroplastic isoform X2 [Brassica rapa]	AT4G39210.1 Glucose-1-phosphate adenylyltransferase family protein
Bra024295	1305	29.56	206.205	2.80236	Up	0.886602	-	GO:0009526//plastid envelope	-	-	gi|685321712|ref|XP_009150802.1|/0/PREDICTED: leucine-rich repeat extensin-like protein 3, partial [Brassica rapa]	AT5G64430.1 Octicosapeptide/Phox/Bem1p family protein
Bra009072	2025	3.205	22.32	2.79994	Up	0.834384	K06185|1|3e-60|231|cre:CHLREDRAFT_132213|ATP-binding cassette, subfamily F, member 2	-	GO:0017111//nucleoside-triphosphatase activity;GO:0004672//protein kinase activity;GO:0016876//ligase activity, forming aminoacyl-tRNA and related compounds;GO:0032559	GO:0009207;GO:0010467//gene expression;GO:0006464//cellular protein modification process	gi|674963644|emb|CDX69876.1|/0/BnaA10g22250D [Brassica napus]	AT5G09930.1 ABC transporter family protein
Bra012230	663	124.355	864.935	2.79813	Up	0.891591	-	GO:0043231//intracellular membrane-bounded organelle	GO:0008092//cytoskeletal protein binding	GO:0009725//response to hormone;GO:0009409//response to cold;GO:0006952//defense response;GO:0009408//response to heat;GO:0009845//seed germination	gi|685330877|ref|XP_009103342.1|/2.62936e-62/PREDICTED: dehydrin ERD10-like [Brassica rapa]	AT1G20450.1 Dehydrin family protein
Bra012889	612	10.69	73.95	2.79029	Up	0.875049	K13448|1|1e-77|286|ath:AT3G50770|calcium-binding protein CML	-	GO:0046872//metal ion binding	-	gi|685291218|ref|XP_009136559.1|/9.67965e-95/PREDICTED: probable calcium-binding protein CML41 isoform X1 [Brassica rapa]	AT3G50770.1 calmodulin-like 41
Bra030494	456	14.11	97.605	2.79024	Up	0.879201	-	-	-	GO:0006952//defense response;GO:0009414//response to water deprivation;GO:0003006//developmental process involved in reproduction;GO:0009642//response to light intensity	gi|674872339|emb|CDY61864.1|/1.21713e-80/BnaAnng17910D [Brassica napus]	AT1G01470.1 Late embryogenesis abundant protein
Bra013892	342	3.99	27.585	2.78942	Up	0.845428	-	GO:0044464	-	GO:0009056//catabolic process	gi|685260280|ref|XP_009139230.1|/1.21791e-61/PREDICTED: uncharacterized protein LOC103863220 [Brassica rapa]	AT4G25433.1 peptidoglycan-binding LysM domain-containing protein
Bra015547	1086	18.285	124.95	2.77262	Up	0.881843	-	-	-	-	gi|685370479|ref|XP_009119002.1|/0/PREDICTED: uncharacterized protein LOC103843989 [Brassica rapa]	AT1G07040.1 unknown protein; INVOLVED IN: biological_process unknown; LOCATED IN: chloroplast; EXPRESSED IN: 24 plant structures; EXPRESSED DURING: 14 growth stages; BEST Arabidopsis thaliana protein match is: unknown protein (TAIR:AT1G27030.1); Has 540 Blast hits to 538 proteins in 187 species: Archae - 0; Bacteria - 333; Metazoa - 0; Fungi - 0; Plants - 67; Viruses - 0; Other Eukaryotes - 140 (…
Bra007054	570	6.99	47.655	2.76926	Up	0.865728	-	GO:0031225//anchored component of membrane	-	-	gi|674955489|emb|CDX78217.1|/5.42606e-74/BnaA09g34120D [Brassica napus]	AT3G54200.1 Late embryogenesis abundant (LEA) hydroxyproline-rich glycoprotein family
Bra002766	1269	10.96	74.15	2.7582	Up	0.874737	K14497|1|0.0|660|aly:ARALYDRAFT_495797|protein phosphatase 2C [EC:3.1.3.16]	GO:0043231//intracellular membrane-bounded organelle;GO:0043234//protein complex	GO:0019900//kinase binding;GO:0046872//metal ion binding;GO:0004721//phosphoprotein phosphatase activity	GO:0010118//stomatal movement;GO:0009767//photosynthetic electron transport chain;GO:0009738//abscisic acid-activated signaling pathway;GO:0006950//response to stress;GO:0006464//cellular protein modification process	gi|685373754|ref|XP_009120223.1|/0/PREDICTED: protein phosphatase 2C 77 [Brassica rapa]	AT5G57050.1 Protein phosphatase 2C family protein
Bra034389	1356	3.01	20.355	2.75755	Up	0.828804	-	GO:0043231//intracellular membrane-bounded organelle	GO:0008194//UDP-glycosyltransferase activity	GO:0009832//plant-type cell wall biogenesis;GO:0010413//glucuronoxylan metabolic process	gi|685300212|ref|XP_009140845.1|/0/PREDICTED: probable glucuronoxylan glucuronosyltransferase IRX7 [Brassica rapa]	AT2G28110.1 Exostosin family protein
Bra027922	993	10.365	68.825	2.73121	Up	0.872735	K00750|1|4e-14|77.0|rcu:RCOM_1590700|glycogenin glucosyltransferase [EC:2.4.1.186]	-	GO:0016757//transferase activity, transferring glycosyl groups	GO:0005975//carbohydrate metabolic process;GO:0006950//response to stress	gi|674891018|emb|CDY41701.1|/0/BnaA09g15290D [Brassica napus]	AT1G56600.1 galactinol synthase 2
Bra039165	1074	3.525	23.26	2.72216	Up	0.834695	K13379|1|0.0|704|aly:ARALYDRAFT_477458|reversibly glycosylated polypeptide / UDP-arabinopyranose mutase [EC:2.4.1.- 5.4.99.30]	GO:0005840//ribosome;GO:0030312//external encapsulating structure;GO:0044459;GO:0031985//Golgi cisterna;GO:0031090//organelle membrane	GO:0035251//UDP-glucosyltransferase activity;GO:0016759//cellulose synthase activity	GO:0010038//response to metal ion;GO:0045229//external encapsulating structure organization;GO:0009250//glucan biosynthetic process;GO:0006970//response to osmotic stress;GO:0042546//cell wall biogenesis	gi|674873342|emb|CDY60468.1|/0/BnaAnng16810D [Brassica napus]	AT3G02230.1 reversibly glycosylated polypeptide 1
Bra025545	834	9.315	61.265	2.71744	Up	0.870553	-	-	-	-	gi|685298528|ref|XP_009140042.1|/3.70519e-162/PREDICTED: uncharacterized protein LOC103864027 [Brassica rapa]	AT5G40800.1 unknown protein; BEST Arabidopsis thaliana protein match is: unknown protein (TAIR:AT3G27250.1); Has 1807 Blast hits to 1807 proteins in 277 species: Archae - 0; Bacteria - 0; Metazoa - 736; Fungi - 347; Plants - 385; Viruses - 0; Other Eukaryotes - 339 (source: NCBI BLink).
Bra015637	987	4.55	29.84	2.71331	Up	0.847315	K01834|1|1e-145|513|aly:ARALYDRAFT_316714|2,3-bisphosphoglycerate-dependent phosphoglycerate mutase [EC:5.4.2.1]	GO:0009532//plastid stroma;GO:0009526//plastid envelope;GO:0005576//extracellular region	GO:0004619//phosphoglycerate mutase activity	GO:0006007//glucose catabolic process;GO:0010035//response to inorganic substance;GO:0005982//starch metabolic process;GO:0009581//detection of external stimulus;GO:0006950//response to stress	gi|685338955|ref|XP_009106452.1|/6.6285e-175/PREDICTED: phosphoglycerate mutase [Brassica rapa]	AT1G78050.1 phosphoglycerate/bisphosphoglycerate mutase
Bra018085	1803	7.45	48.79	2.71127	Up	0.864989	-	-	GO:0060089;GO:0005488//binding	GO:0042743//hydrogen peroxide metabolic process;GO:0009627//systemic acquired resistance;GO:0048646//anatomical structure formation involved in morphogenesis;GO:0033554//cellular response to stress;GO:0044238;GO:0000302//response to reactive oxygen species	gi|685319055|ref|XP_009149846.1|/0/PREDICTED: senescence-associated carboxylesterase 101 [Brassica rapa]	AT3G48080.1 alpha/beta-Hydrolases superfamily protein
Bra018412	1275	19.445	126.42	2.70075	Up	0.880612	K15406|1|1e-121|434|aly:ARALYDRAFT_330267|wax-ester synthase / diacylglycerol O-acyltransferase [EC:2.3.1.75 2.3.1.20]	GO:0043231//intracellular membrane-bounded organelle	GO:0016411//acylglycerol O-acyltransferase activity	GO:0006633//fatty acid biosynthetic process	gi|674894276|emb|CDY38569.1|/2.75491e-146/BnaA05g12980D [Brassica napus]	AT5G37300.1 O-acyltransferase (WSD1-like) family protein
Bra004090	699	19.88	128.59	2.69339	Up	0.880727	-	GO:0043231//intracellular membrane-bounded organelle	GO:0008135//translation factor activity, nucleic acid binding	GO:0006412//translation	gi|685335449|ref|XP_009105122.1|/2.188e-111/PREDICTED: REF/SRPP-like protein At1g67360 [Brassica rapa]	AT1G67360.1 Rubber elongation factor protein (REF)
Bra028419	1146	3.88	25.085	2.6927	Up	0.838224	K01931|1|1e-58|225|ppp:PHYPADRAFT_182911|protein neuralized [EC:6.3.2.19];K13118|3|8e-09|59.7|cre:CHLREDRAFT_17930|protein DGCR14;K15688|4|1e-08|58.9|smo:SELMODRAFT_231449|E3 ubiquitin-protein ligase MUL1 [EC:6.3.2.19];K12489|5|5e-08|57.0|pop:POPTR_554695|Arf-GAP with coiled-coil, ANK repeat and PH domain-containing protein	-	GO:0046914//transition metal ion binding	-	gi|685268022|ref|XP_009125093.1|/0/PREDICTED: putative E3 ubiquitin-protein ligase XBAT34 [Brassica rapa]	AT4G14365.1 XB3 ortholog 4 in Arabidopsis thaliana
Bra016002	645	98.72	637.69	2.69144	Up	0.889409	-	-	GO:0061135	GO:0010466//negative regulation of peptidase activity	gi|685337690|ref|XP_009105984.1|/4.20609e-116/PREDICTED: kunitz-type serine protease inhibitor DrTI-like [Brassica rapa]	AT1G73260.1 kunitz trypsin inhibitor 1
Bra021275	1275	9.12	58.885	2.69079	Up	0.869306	K00207|1|0.0|810|ath:AT3G17810|dihydropyrimidine dehydrogenase (NADP+) [EC:1.3.1.2]	GO:0044424	GO:0004152//dihydroorotate dehydrogenase activity	GO:0019856//pyrimidine nucleobase biosynthetic process;GO:0009174	gi|685265200|ref|XP_009113731.1|/0/PREDICTED: dihydropyrimidine dehydrogenase [NADP(+)]-like [Brassica rapa]	AT3G17810.1 pyrimidine 1
Bra040067	660	8.38	53.885	2.68486	Up	0.867106	K08515|1|9e-116|413|aly:ARALYDRAFT_913237|vesicle-associated membrane protein 7	GO:0031090//organelle membrane;GO:0043231//intracellular membrane-bounded organelle;GO:0031224//intrinsic component of membrane	-	GO:0009725//response to hormone;GO:0046907//intracellular transport;GO:0006970//response to osmotic stress	gi|674872696|emb|CDY61387.1|/4.66909e-117/BnaA08g30600D [Brassica napus]	AT4G32150.1 vesicle-associated membrane protein 711
Bra035574	348	6.99	44.935	2.68448	Up	0.862347	-	-	-	-	gi|674912412|emb|CDY20764.1|/1.25212e-35/BnaA02g09040D [Brassica napus]	AT5G55450.1 Bifunctional inhibitor/lipid-transfer protein/seed storage 2S albumin superfamily protein
Bra030836	990	3.13	20.07	2.68081	Up	0.82626	K10523|1|9e-15|79.0|aly:ARALYDRAFT_903228|speckle-type POZ protein	-	-	-	gi|685339957|ref|XP_009106829.1|/0/PREDICTED: BTB/POZ domain-containing protein At1g55760 [Brassica rapa]	AT1G55760.1 BTB/POZ domain-containing protein
Bra031205	567	25.58	163.99	2.68052	Up	0.883074	-	-	GO:0005488//binding	GO:0009414//response to water deprivation	gi|674919387|emb|CDY13801.1|/9.53328e-92/BnaA09g43030D [Brassica napus]	AT2G21620.1 Adenine nucleotide alpha hydrolases-like superfamily protein
Bra005677	831	42.8	273.72	2.67702	Up	0.88657	K00522|1|4e-106|382|aly:ARALYDRAFT_907990|ferritin heavy chain [EC:1.16.3.1]	GO:0009532//plastid stroma;GO:0009534//chloroplast thylakoid	GO:0016724;GO:0005506//iron ion binding	GO:0048827//phyllome development;GO:0051707//response to other organism;GO:0010038//response to metal ion;GO:0000302//response to reactive oxygen species;GO:0000041//transition metal ion transport;GO:0006875//cellular metal ion homeostasis;GO:0009791//post-embryonic development;GO:0044237//cellular metabolic process	gi|396075510|gb|AFN81242.1|/2.25489e-125/ferritin 1 [Brassica rapa subsp. pekinensis]	AT5G01600.1 ferretin 1
Bra005609	786	7.225	46.06	2.67244	Up	0.862807	K07025|1|1e-128|456|aly:ARALYDRAFT_668954|putative hydrolase of the HAD superfamily	-	GO:0003824//catalytic activity	-	gi|674872685|emb|CDY61401.1|/8.68387e-142/BnaA05g35130D [Brassica napus]	AT2G32150.1 Haloacid dehalogenase-like hydrolase (HAD) superfamily protein
Bra000263	429	3.26	20.7	2.66669	Up	0.827754	-	GO:0009526//plastid envelope;GO:0009532//plastid stroma	-	GO:0006952//defense response	gi|685285269|ref|XP_009133542.1|/1.48098e-64/PREDICTED: embryonic protein DC-8-like [Brassica rapa]	AT2G42530.1 cold regulated 15b
Bra005682	723	6.575	41.745	2.66654	Up	0.859689	K15687|1|8e-06|48.9|osa:4340884|E3 ubiquitin-protein ligase makorin [EC:6.3.2.19]	-	GO:0046914//transition metal ion binding	-	gi|685279453|ref|XP_009130648.1|/1.43822e-140/PREDICTED: uncharacterized protein LOC103855416 [Brassica rapa]	AT5G01520.1 RING/U-box superfamily protein
Bra022925	1638	11.865	75.325	2.66642	Up	0.87331	K08176|1|0.0|924|aly:ARALYDRAFT_482224|MFS transporter, PHS family, inorganic phosphate transporter	GO:0031224//intrinsic component of membrane	GO:0015291//secondary active transmembrane transporter activity;GO:0015103//inorganic anion transmembrane transporter activity	GO:0015698//inorganic anion transport	gi|685284009|ref|XP_009132907.1|/0/PREDICTED: probable inorganic phosphate transporter 1-5 [Brassica rapa]	AT2G32830.1 phosphate transporter 1;5
Bra017744	486	157.005	995.66	2.66484	Up	0.889901	K03686|1|7e-13|71.2|ppp:PHYPADRAFT_108109|molecular chaperone DnaJ;K09517|2|1e-12|70.1|vvi:100252105|DnaJ homolog subfamily B member 11	GO:0009536//plastid	GO:0005515//protein binding	GO:0044267//cellular protein metabolic process;GO:0050896//response to stimulus	gi|685295033|ref|XP_009138405.1|/1.24714e-69/PREDICTED: chaperone protein dnaJ 11, chloroplastic-like [Brassica rapa]	AT4G36040.1 Chaperone DnaJ-domain superfamily protein
Bra025866	639	2.455	15.465	2.65521	Up	0.807798	-	-	-	-	gi|674903504|emb|CDY29485.1|/2.0791e-108/BnaA06g14850D [Brassica napus]	AT1G21010.1 unknown protein; FUNCTIONS IN: molecular_function unknown; INVOLVED IN: N-terminal protein myristoylation; LOCATED IN: cellular_component unknown; EXPRESSED IN: 24 plant structures; EXPRESSED DURING: 14 growth stages; BEST Arabidopsis thaliana protein match is: unknown protein (TAIR:AT1G76600.1); Has 206 Blast hits to 206 proteins in 13 species: Archae - 0; Bacteria - 0; Metazoa - 0; …
Bra007232	615	15.845	99.02	2.64369	Up	0.876887	-	-	-	-	gi|685364251|ref|XP_009116323.1|/2.67094e-90/PREDICTED: vitellogenin-2 [Brassica rapa]	AT3G56260.2 unknown protein; FUNCTIONS IN: molecular_function unknown; INVOLVED IN: biological_process unknown; LOCATED IN: cellular_component unknown; EXPRESSED IN: 8 plant structures; EXPRESSED DURING: F mature embryo stage, petal differentiation and expansion stage, E expanded cotyledon stage, D bilateral stage; BEST Arabidopsis thaliana protein match is: unknown protein (TAIR:AT2G40475.1).
Bra033432	408	4.27	26.61	2.63966	Up	0.840423	-	-	GO:0005488//binding	GO:0042743//hydrogen peroxide metabolic process;GO:0009627//systemic acquired resistance;GO:0042742//defense response to bacterium;GO:0010260//organ senescence;GO:0048646//anatomical structure formation involved in morphogenesis	gi|674909940|emb|CDY23216.1|/5.20116e-75/BnaA04g05430D [Brassica napus]	AT3G52430.1 alpha/beta-Hydrolases superfamily protein
Bra040870	1365	12.69	78.965	2.63752	Up	0.873375	-	GO:0016020//membrane	-	GO:0006970//response to osmotic stress;GO:0009642//response to light intensity	gi|685385048|ref|XP_009124573.1|/0/PREDICTED: uncharacterized protein LOC103849563 [Brassica rapa]	AT2G17840.1 Senescence/dehydration-associated protein-related
Bra022585	1746	17.98	111.715	2.63536	Up	0.878315	-	-	-	GO:0006950//response to stress;GO:0009628//response to abiotic stimulus;GO:0042221//response to chemical	gi|685272360|ref|XP_009127246.1|/0/PREDICTED: low-temperature-induced 65 kDa protein-like isoform X2 [Brassica rapa]	AT5G52300.1 Low temperature induced 65
Bra025168	501	27.35	169.65	2.63295	Up	0.8825	-	-	-	-	gi|674919500|emb|CDY13594.1|/2.04411e-76/BnaA06g33290D [Brassica napus]	AT3G25870.1 unknown protein; BEST Arabidopsis thaliana protein match is: unknown protein (TAIR:AT1G13360.1); Has 50 Blast hits to 50 proteins in 12 species: Archae - 0; Bacteria - 0; Metazoa - 0; Fungi - 0; Plants - 50; Viruses - 0; Other Eukaryotes - 0 (source: NCBI BLink).
Bra005501	720	75.695	466.19	2.62265	Up	0.887636	-	GO:0009941//chloroplast envelope	GO:0046872//metal ion binding;GO:0016702//oxidoreductase activity, acting on single donors with incorporation of molecular oxygen, incorporation of two atoms of oxygen	GO:0051707//response to other organism;GO:0006631//fatty acid metabolic process;GO:0009725//response to hormone;GO:0009414//response to water deprivation;GO:0006970//response to osmotic stress	gi|685306279|ref|XP_009143868.1|/1.02373e-131/PREDICTED: probable peroxygenase 3 [Brassica rapa]	AT2G33380.1 Caleosin-related family protein
Bra007198	636	7.35	45.045	2.61555	Up	0.861281	-	-	-	GO:0009267//cellular response to starvation	gi|674961786|emb|CDX72192.1|/3.0818e-92/BnaC08g26820D [Brassica napus]	AT3G55880.2 Alpha/beta hydrolase related protein
Bra013739	525	8.21	50.22	2.61281	Up	0.86407	-	-	-	-	gi|674884908|emb|CDY47615.1|/1.01842e-77/BnaA01g13500D [Brassica napus]	AT4G23880.1 unknown protein; Has 73 Blast hits to 69 proteins in 22 species: Archae - 0; Bacteria - 4; Metazoa - 9; Fungi - 2; Plants - 18; Viruses - 0; Other Eukaryotes - 40 (source: NCBI BLink).
Bra011208	225	21.64	131.82	2.6068	Up	0.879677	-	GO:0031224//intrinsic component of membrane	-	GO:0006952//defense response;GO:0006972//hyperosmotic response	gi|47132406|gb|AAT11798.1|/5.24091e-35/salt and low temperature response protein [Brassica rapa subsp. pekinensis]	AT4G30650.1 Low temperature and salt responsive protein family
Bra005291	768	5.315	32.365	2.60629	Up	0.849006	-	GO:0016020//membrane	-	GO:0045333//cellular respiration	gi|685305749|ref|XP_009143606.1|/5.38817e-115/PREDICTED: uncharacterized protein LOC103867303 [Brassica rapa]	AT2G36220.1 unknown protein; BEST Arabidopsis thaliana protein match is: unknown protein (TAIR:AT3G52710.1); Has 74 Blast hits to 74 proteins in 10 species: Archae - 0; Bacteria - 0; Metazoa - 0; Fungi - 0; Plants - 74; Viruses - 0; Other Eukaryotes - 0 (source: NCBI BLink).
Bra018532	384	124.125	750.755	2.59655	Up	0.888473	-	-	-	-	gi|685307668|ref|XP_009144547.1|/2.49296e-58/PREDICTED: auxin-repressed 12.5 kDa protein-like [Brassica rapa]	AT1G56220.1 Dormancy/auxin associated family protein
Bra022197	534	2.575	15.57	2.59612	Up	0.806994	-	-	-	-	gi|685311123|ref|XP_009146136.1|/8.62119e-08/PREDICTED: glycine-rich cell wall structural protein 2-like [Brassica rapa]	-
Bra031968	777	10.225	61.815	2.59586	Up	0.868977	-	-	-	-	gi|685278912|ref|XP_009130393.1|/2.02952e-138/PREDICTED: uncharacterized protein LOC103855193 [Brassica rapa]	AT3G03870.2 unknown protein; BEST Arabidopsis thaliana protein match is: unknown protein (TAIR:AT5G18130.1); Has 47 Blast hits to 47 proteins in 13 species: Archae - 0; Bacteria - 0; Metazoa - 2; Fungi - 0; Plants - 45; Viruses - 0; Other Eukaryotes - 0 (source: NCBI BLink).
Bra005739	453	14.81	89.395	2.59362	Up	0.874803	-	-	-	-	gi|674900981|emb|CDY31936.1|/4.69331e-42/BnaA07g00590D [Brassica napus]	AT2G20820.1 unknown protein; Has 44 Blast hits to 44 proteins in 13 species: Archae - 0; Bacteria - 0; Metazoa - 0; Fungi - 0; Plants - 44; Viruses - 0; Other Eukaryotes - 0 (source: NCBI BLink).
Bra039816	1065	27.33	164.52	2.58971	Up	0.881679	K00430|1|9e-179|624|aly:ARALYDRAFT_323056|peroxidase [EC:1.11.1.7]	GO:0005618//cell wall;GO:0043231//intracellular membrane-bounded organelle;GO:0031090//organelle membrane;GO:0005576//extracellular region	GO:0016209//antioxidant activity;GO:0003824//catalytic activity;GO:0005506//iron ion binding	GO:0009314//response to radiation;GO:0006952//defense response;GO:0000902//cell morphogenesis;GO:0042743//hydrogen peroxide metabolic process	gi|685381235|ref|XP_009123209.1|/0/PREDICTED: peroxidase 32 [Brassica rapa]	AT3G32980.1 Peroxidase superfamily protein
Bra004251	957	26.355	157.465	2.57888	Up	0.881236	K10251|1|8e-171|597|aly:ARALYDRAFT_475877|beta-keto reductase [EC:1.1.1.-]	GO:0043231//intracellular membrane-bounded organelle	GO:0016616//oxidoreductase activity, acting on the CH-OH group of donors, NAD or NADP as acceptor	GO:0000038//very long-chain fatty acid metabolic process;GO:0007275//multicellular organismal development	gi|685335919|ref|XP_009105320.1|/0/PREDICTED: very-long-chain 3-oxoacyl-CoA reductase 1 [Brassica rapa]	AT1G67730.1 beta-ketoacyl reductase 1
Bra022955	327	379.59	2235.24	2.55791	Up	0.887899	-	-	-	GO:0009746;GO:0034285	gi|674948690|emb|CDX84669.1|/1.31356e-57/BnaA03g15610D [Brassica napus]	AT2G33830.2 Dormancy/auxin associated family protein
Bra029804	615	4.455	26.23	2.55772	Up	0.836862	K07976|1|2e-98|356|ath:AT3G09910|Rab family, other;K07910|3|7e-87|317|aly:ARALYDRAFT_660194|Ras-related protein Rab-18	GO:0042579//microbody	GO:0032029//myosin tail binding;GO:0032561//guanyl ribonucleotide binding;GO:0032559	GO:0006810//transport;GO:0035556//intracellular signal transduction;GO:0006351//transcription, DNA-templated	gi|685312633|ref|XP_009146886.1|/3.24612e-108/PREDICTED: ras-related protein RABC2b [Brassica rapa]	AT3G09910.3 RAB GTPase homolog C2B
Bra002450	795	10.375	60.98	2.55522	Up	0.866827	-	-	-	-	gi|685374875|ref|XP_009120614.1|/1.5271e-84/PREDICTED: uncharacterized protein LOC103845494 [Brassica rapa]	AT5G60800.1 Heavy metal transport/detoxification superfamily protein
Bra008025	633	61.89	362.86	2.55163	Up	0.884305	-	-	GO:0061135	GO:0010466//negative regulation of peptidase activity	gi|119720792|gb|ABL97966.1|/1.72435e-122/Kunitz-type cysteine protease inhibitor [Brassica rapa]	AT1G72290.1 Kunitz family trypsin and protease inhibitor protein
Bra013850	417	5.135	30.105	2.55157	Up	0.843114	-	-	-	GO:0009725//response to hormone;GO:0006972//hyperosmotic response;GO:0009791//post-embryonic development;GO:0048229//gametophyte development;GO:0006914//autophagy	gi|685260163|ref|XP_009138695.1|/2.50506e-55/PREDICTED: HVA22-like protein d [Brassica rapa]	AT4G24960.1 HVA22 homologue D
Bra003592	489	30.33	176.93	2.54436	Up	0.879792	K03686|1|1e-07|53.5|mtr:MTR_3g087030|molecular chaperone DnaJ	GO:0009532//plastid stroma	GO:0005515//protein binding	GO:0050896//response to stimulus	gi|674965732|emb|CDX67975.1|/1.25152e-73/BnaA07g20150D [Brassica napus]	AT1G80920.1 Chaperone DnaJ-domain superfamily protein
Bra037269	264	18.605	108.205	2.54	Up	0.874787	-	-	-	-	gi|674954512|emb|CDX78985.1|/2.26873e-44/BnaA01g10520D [Brassica napus]	-
Bra031601	597	15.68	90.71	2.53234	Up	0.872309	K03231|1|4e-112|401|ath:AT1G07920|elongation factor 1-alpha	GO:0031981//nuclear lumen;GO:0009536//plastid;GO:0031090//organelle membrane	GO:0017111//nucleoside-triphosphatase activity;GO:0008135//translation factor activity, nucleic acid binding;GO:0032561//guanyl ribonucleotide binding;GO:0005515//protein binding	GO:0006412//translation;GO:0010038//response to metal ion;GO:0009207	gi|685306961|ref|XP_009144204.1|/7.02983e-111/PREDICTED: elongation factor 1-alpha 1-like [Brassica rapa]	AT5G60390.3 GTP binding Elongation factor Tu family protein
Bra007335	882	15.33	88.5	2.52932	Up	0.871898	K08818|1|2e-06|51.2|vvi:100246062|cell division cycle 2-like [EC:2.7.11.22]	-	-	-	gi|685364544|ref|XP_009116456.1|/1.58535e-127/PREDICTED: remorin [Brassica rapa]	AT3G57540.1 Remorin family protein
Bra028635	888	3.365	19.33	2.52216	Up	0.81881	-	GO:0005618//cell wall	GO:0016788//hydrolase activity, acting on ester bonds;GO:0016747//transferase activity, transferring acyl groups other than amino-acyl groups	GO:0000003//reproduction	gi|685269533|ref|XP_009125760.1|/3.47921e-163/PREDICTED: uncharacterized protein LOC103850724 [Brassica rapa]	AT5G09440.1 EXORDIUM like 4
Bra018248	978	3.025	17.33	2.51826	Up	0.811245	K00847|1|0.0|634|aly:ARALYDRAFT_482071|fructokinase [EC:2.7.1.4]	GO:0016020//membrane	GO:0016773//phosphotransferase activity, alcohol group as acceptor	GO:0006796//phosphate-containing compound metabolic process;GO:0019321//pentose metabolic process	gi|685306973|ref|XP_009144211.1|/0/PREDICTED: probable fructokinase-1 [Brassica rapa]	AT2G31390.1 pfkB-like carbohydrate kinase family protein
Bra039022	1074	15.61	89.415	2.51805	Up	0.8718	K15172|1|1e-26|118|vcn:VOLCADRAFT_106802|transcription elongation factor SPT5	-	GO:0046872//metal ion binding	GO:0006351//transcription, DNA-templated	gi|685327690|ref|XP_009102134.1|/3.41943e-167/PREDICTED: zinc finger CCCH domain-containing protein 20 [Brassica rapa]	AT2G19810.1 CCCH-type zinc finger family protein
Bra014542	1224	4.63	26.505	2.51718	Up	0.836189	K13430|1|2e-70|264|rcu:RCOM_1078760|serine/threonine-protein kinase PBS1 [EC:2.7.11.1]	GO:0016020//membrane	GO:0004672//protein kinase activity;GO:0032559	GO:0006464//cellular protein modification process	gi|685296126|ref|XP_009138918.1|/0/PREDICTED: PTI1-like tyrosine-protein kinase 3 isoform X1 [Brassica rapa]	AT3G59350.3 Protein kinase superfamily protein
Bra033283	1590	3.39	19.38	2.51521	Up	0.818941	K15397|1|0.0|935|ath:AT1G01120|3-ketoacyl-CoA synthase [EC:2.3.1.-]	GO:0005840//ribosome;GO:0043231//intracellular membrane-bounded organelle	GO:0005488//binding;GO:0004312//fatty acid synthase activity	GO:0006633//fatty acid biosynthetic process;GO:0009314//response to radiation;GO:0007275//multicellular organismal development;GO:0006950//response to stress	gi|685372093|ref|XP_009119672.1|/0/PREDICTED: 3-ketoacyl-CoA synthase 1 [Brassica rapa]	AT1G01120.1 3-ketoacyl-CoA synthase 1
Bra019209	1251	3.285	18.77	2.51446	Up	0.816808	K01728|1|0.0|686|aly:ARALYDRAFT_492364|pectate lyase [EC:4.2.2.2]	GO:0044464	GO:0016837	-	gi|685293115|ref|XP_009137472.1|/0/PREDICTED: probable pectate lyase 18 [Brassica rapa]	AT4G24780.2 Pectin lyase-like superfamily protein
Bra001037	1074	4.06	23.165	2.5124	Up	0.828952	K13379|1|0.0|725|aly:ARALYDRAFT_477458|reversibly glycosylated polypeptide / UDP-arabinopyranose mutase [EC:2.4.1.- 5.4.99.30]	GO:0005840//ribosome;GO:0030312//external encapsulating structure;GO:0044459;GO:0031985//Golgi cisterna;GO:0031090//organelle membrane	GO:0035251//UDP-glucosyltransferase activity;GO:0016759//cellulose synthase activity	GO:0010038//response to metal ion;GO:0045229//external encapsulating structure organization;GO:0009250//glucan biosynthetic process;GO:0006970//response to osmotic stress;GO:0042546//cell wall biogenesis	gi|674941537|emb|CDX91983.1|/0/BnaC03g32850D [Brassica napus]	AT3G02230.1 reversibly glycosylated polypeptide 1
Bra004435	489	128.71	730.935	2.50562	Up	0.885322	-	GO:0043231//intracellular membrane-bounded organelle	-	GO:0050896//response to stimulus	gi|674953697|emb|CDX80128.1|/1.92188e-90/BnaA05g00280D [Brassica napus]	AT2G47710.1 Adenine nucleotide alpha hydrolases-like superfamily protein
Bra007100	861	7.085	40.08	2.50004	Up	0.853568	K09872|1|6e-149|524|ath:AT3G54820|aquaporin PIP	GO:0031224//intrinsic component of membrane	GO:0005372//water transmembrane transporter activity	GO:0006810//transport	gi|674955537|emb|CDX78265.1|/7.98936e-154/BnaA09g34600D [Brassica napus]	AT3G54820.1 plasma membrane intrinsic protein 2;5
Bra001702	519	3.235	18.265	2.49724	Up	0.814773	-	-	-	-	gi|685289255|ref|XP_009135574.1|/1.69247e-63/PREDICTED: uncharacterized protein LOC103859748 [Brassica rapa]	AT3G18295.1 Protein of unknown function (DUF1639)
Bra029765	243	232.535	1309.16	2.49312	Up	0.885913	-	-	GO:0046914//transition metal ion binding	-	gi|1480016|dbj|BAA11391.1|/5.10302e-25/metallothionein-like protein [Brassica rapa]	AT3G09390.1 metallothionein 2A
Bra005071	1524	8.535	47.97	2.49067	Up	0.859147	K08176|1|0.0|848|aly:ARALYDRAFT_482913|MFS transporter, PHS family, inorganic phosphate transporter	GO:0043231//intracellular membrane-bounded organelle;GO:0031224//intrinsic component of membrane	GO:0015291//secondary active transmembrane transporter activity;GO:0015103//inorganic anion transmembrane transporter activity	GO:0015698//inorganic anion transport;GO:0009725//response to hormone	gi|685305255|ref|XP_009143351.1|/0/PREDICTED: inorganic phosphate transporter 1-4-like [Brassica rapa]	AT2G38940.1 phosphate transporter 1;4
Bra010519	609	19.335	108.295	2.48568	Up	0.8739	-	-	-	-	gi|685346531|ref|XP_009109278.1|/8.86573e-95/PREDICTED: ganglioside-induced differentiation-associated protein 2-like [Brassica rapa]	AT4G35750.1 SEC14 cytosolic factor family protein / phosphoglyceride transfer family protein
Bra021847	720	131.01	733.605	2.48533	Up	0.885043	-	GO:0009941//chloroplast envelope	GO:0046872//metal ion binding;GO:0016702//oxidoreductase activity, acting on single donors with incorporation of molecular oxygen, incorporation of two atoms of oxygen	GO:0051707//response to other organism;GO:0006631//fatty acid metabolic process;GO:0009725//response to hormone;GO:0009414//response to water deprivation;GO:0006970//response to osmotic stress	gi|685301225|ref|XP_009141309.1|/2.09807e-131/PREDICTED: probable peroxygenase 3 [Brassica rapa]	AT2G33380.1 Caleosin-related family protein
Bra033431	1293	5.17	28.94	2.48483	Up	0.83998	-	-	GO:0005488//binding;GO:0016788//hydrolase activity, acting on ester bonds	GO:0044238;GO:0048646//anatomical structure formation involved in morphogenesis;GO:0042742//defense response to bacterium;GO:0009627//systemic acquired resistance;GO:0042743//hydrogen peroxide metabolic process;GO:0010260//organ senescence	gi|685297282|ref|XP_009139456.1|/0/PREDICTED: lipase-like PAD4 isoform X2 [Brassica rapa]	AT3G52430.1 alpha/beta-Hydrolases superfamily protein
Bra004314	243	11.285	62.765	2.47555	Up	0.865465	-	-	-	-	gi|674894222|emb|CDY38587.1|/3.24823e-29/BnaC06g30100D [Brassica napus]	AT1G68500.1 unknown protein; BEST Arabidopsis thaliana protein match is: unknown protein (TAIR:AT1G25422.1); Has 16 Blast hits to 16 proteins in 6 species: Archae - 0; Bacteria - 0; Metazoa - 0; Fungi - 0; Plants - 16; Viruses - 0; Other Eukaryotes - 0 (source: NCBI BLink).
Bra007170	783	8.34	46.335	2.47398	Up	0.857588	-	GO:0005618//cell wall	-	GO:0000902//cell morphogenesis;GO:0009827//plant-type cell wall modification	gi|687568201|ref|NP_001288942.1|/1.18375e-140/expansin-A16 precursor [Brassica rapa]	AT3G55500.1 expansin A16
Bra011485	1320	25.39	140.46	2.46783	Up	0.876214	K14432|1|4e-114|409|aly:ARALYDRAFT_491272|ABA responsive element binding factor	-	GO:0003676//nucleic acid binding	GO:0006970//response to osmotic stress;GO:0009755//hormone-mediated signaling pathway;GO:0006351//transcription, DNA-templated	gi|658384702|gb|AID60117.1|/3.39063e-150/ABA-responsive element-binding protein [Brassica napus]	AT4G34000.3 abscisic acid responsive elements-binding factor 3
Bra002038	1143	40.45	223.61	2.46677	Up	0.880169	K14497|1|5e-152|535|ath:AT3G11410|protein phosphatase 2C [EC:3.1.3.16]	-	GO:0019900//kinase binding;GO:0004721//phosphoprotein phosphatase activity	GO:0010118//stomatal movement;GO:0010359//regulation of anion channel activity;GO:0009738//abscisic acid-activated signaling pathway;GO:0006950//response to stress	gi|685376391|ref|XP_009121141.1|/0/PREDICTED: protein phosphatase 2C 37-like [Brassica rapa]	AT3G11410.1 protein phosphatase 2CA
Bra019407	375	7.225	39.905	2.4655	Up	0.852616	K08341|1|6e-59|223|bdi:100827349|GABA(A) receptor-associated protein (autophagy-related protein 8)	GO:0044437	GO:0008641//small protein activating enzyme activity;GO:0019783//small conjugating protein-specific protease activity;GO:0016879//ligase activity, forming carbon-nitrogen bonds	GO:0044248//cellular catabolic process	gi|674939269|emb|CDX94071.1|/2.8922e-67/BnaC07g37050D [Brassica napus]	AT4G21980.2 Ubiquitin-like superfamily protein
Bra014853	390	44.82	246.63	2.46013	Up	0.880596	-	GO:0044464	GO:0016787//hydrolase activity;GO:0005488//binding	GO:0010876//lipid localization	gi|674957428|emb|CDX76181.1|/1.48804e-59/BnaA04g04450D [Brassica napus]	AT3G53980.2 Bifunctional inhibitor/lipid-transfer protein/seed storage 2S albumin superfamily protein
Bra009707	618	43.76	239.095	2.4499	Up	0.880153	-	-	-	-	gi|674945248|emb|CDX88048.1|/7.18297e-59/BnaA06g26390D [Brassica napus]	AT5G23750.2 Remorin family protein
Bra030240	246	38.63	210.74	2.44767	Up	0.879267	-	-	-	-	gi|674913341|emb|CDY19743.1|/3.42353e-39/BnaA09g03960D [Brassica napus]	-
Bra016644	1953	6.32	34.435	2.44588	Up	0.846265	K03283|1|0.0|1172|aly:ARALYDRAFT_471804|heat shock 70kDa protein 1/8	GO:0016020//membrane;GO:0030312//external encapsulating structure;GO:0009536//plastid	GO:0016628//oxidoreductase activity, acting on the CH-CH group of donors, NAD or NADP as acceptor;GO:0032559	GO:0006950//response to stress;GO:0044267//cellular protein metabolic process	gi|685349787|ref|XP_009110463.1|/0/PREDICTED: heat shock 70 kDa protein 5-like [Brassica rapa]	AT1G16030.1 heat shock protein 70B
Bra003511	1302	3.165	17.13	2.43625	Up	0.808192	K01710|1|5e-118|422|cme:CME136C|dTDP-glucose 4,6-dehydratase [EC:4.2.1.46];K10046|2|7e-26|116|gmx:100527798|GDP-D-mannose 3', 5'-epimerase [EC:5.1.3.18 5.1.3.-]	GO:0012505//endomembrane system;GO:0031090//organelle membrane;GO:0043231//intracellular membrane-bounded organelle	GO:0016831//carboxy-lyase activity;GO:0048037//cofactor binding;GO:0016836//hydro-lyase activity	GO:0019321//pentose metabolic process;GO:0009226//nucleotide-sugar biosynthetic process	gi|685333581|ref|XP_009104397.1|/0/PREDICTED: UDP-glucuronic acid decarboxylase 2-like [Brassica rapa]	AT3G62830.2 NAD(P)-binding Rossmann-fold superfamily protein
Bra010381	261	45.865	248.025	2.43502	Up	0.880202	-	-	-	-	gi|674918966|emb|CDY14253.1|/1.1011e-44/BnaA08g13840D [Brassica napus]	AT4G28240.1 Wound-responsive family protein
Bra034845	1200	79.555	428.735	2.43006	Up	0.882204	K14497|1|4e-150|528|aly:ARALYDRAFT_478478|protein phosphatase 2C [EC:3.1.3.16]	-	GO:0019900//kinase binding;GO:0004721//phosphoprotein phosphatase activity	GO:0010118//stomatal movement;GO:0010359//regulation of anion channel activity;GO:0009738//abscisic acid-activated signaling pathway;GO:0006950//response to stress	gi|685312335|ref|XP_009146731.1|/0/PREDICTED: protein phosphatase 2C 37 [Brassica rapa]	AT3G11410.1 protein phosphatase 2CA
Bra021770	555	4.735	25.515	2.42991	Up	0.831643	K00676|1|2e-15|79.7|ppp:PHYPADRAFT_104139|ribosomal-protein-alanine N-acetyltransferase [EC:2.3.1.128]	-	GO:0016407//acetyltransferase activity	GO:0009725//response to hormone	gi|674873007|emb|CDY60958.1|/1.67245e-103/BnaA04g28870D [Brassica napus]	AT2G32020.1 Acyl-CoA N-acyltransferases (NAT) superfamily protein
Bra018896	1086	14.2	76.415	2.42796	Up	0.867336	K12126|1|2e-07|55.1|ath:AT1G09530|phytochrome-interacting factor 3	GO:0043231//intracellular membrane-bounded organelle	GO:0001071//nucleic acid binding transcription factor activity	GO:0006351//transcription, DNA-templated	gi|685314372|ref|XP_009147780.1|/0/PREDICTED: transcription factor bHLH122 [Brassica rapa]	AT1G51140.1 basic helix-loop-helix (bHLH) DNA-binding superfamily protein
Bra013714	1278	22.235	119.555	2.42677	Up	0.873605	K11819|1|2e-118|423|aly:ARALYDRAFT_480895|ROOTY/SUPERROOT1 [EC:4.4.1.-];K00815|3|3e-107|386|vvi:100253895|tyrosine aminotransferase [EC:2.6.1.5]	GO:0043231//intracellular membrane-bounded organelle;GO:0005576//extracellular region	GO:0016769//transferase activity, transferring nitrogenous groups;GO:0016846//carbon-sulfur lyase activity;GO:0048037//cofactor binding	GO:0009725//response to hormone;GO:0009636//response to toxic substance;GO:0008652//cellular amino acid biosynthetic process;GO:0006972//hyperosmotic response	gi|685259809|ref|XP_009137236.1|/0/PREDICTED: cystine lyase CORI3-like [Brassica rapa]	AT4G23600.1 Tyrosine transaminase family protein
Bra000018	948	3.71	19.885	2.42219	Up	0.817727	K00011|1|2e-144|509|ath:AT2G37790|aldehyde reductase [EC:1.1.1.21];K00002|2|2e-120|430|osa:4338987|alcohol dehydrogenase (NADP+) [EC:1.1.1.2];K08243|3|8e-58|222|gmx:547911|6'-deoxychalcone synthase [EC:2.3.1.170]	-	GO:0016616//oxidoreductase activity, acting on the CH-OH group of donors, NAD or NADP as acceptor;GO:0050661//NADP binding	GO:0006970//response to osmotic stress;GO:0008152//metabolic process	gi|685284600|ref|XP_009133204.1|/4.21802e-176/PREDICTED: aldo-keto reductase family 4 member C9 [Brassica rapa]	AT2G37770.2 NAD(P)-linked oxidoreductase superfamily protein
Bra034264	294	35.315	188.915	2.41938	Up	0.877659	-	GO:0009536//plastid	-	-	gi|674897566|emb|CDY35346.1|/3.34713e-49/BnaA04g15010D [Brassica napus]	AT2G25625.1 unknown protein; FUNCTIONS IN: molecular_function unknown; INVOLVED IN: biological_process unknown; LOCATED IN: chloroplast; EXPRESSED IN: 10 plant structures; EXPRESSED DURING: LP.06 six leaves visible, LP.04 four leaves visible, 4 anthesis, petal differentiation and expansion stage; Has 24 Blast hits to 24 proteins in 9 species: Archae - 0; Bacteria - 0; Metazoa - 0; Fungi - 0; Plan…
Bra039681	735	34.075	179.445	2.39676	Up	0.876674	K01069|1|3e-17|86.7|gmx:100527131|hydroxyacylglutathione hydrolase [EC:3.1.2.6]	-	GO:0016790//thiolester hydrolase activity	GO:0006970//response to osmotic stress;GO:0006089//lactate metabolic process	gi|674909021|emb|CDY24087.1|/4.8616e-131/BnaA06g00850D [Brassica napus]	AT1G53580.1 glyoxalase II 3
Bra032395	552	14.72	77.22	2.3912	Up	0.866466	K08064|1|1e-32|136|smo:SELMODRAFT_38090|nuclear transcription factor Y, alpha	GO:0005667//transcription factor complex	-	GO:0048506	gi|685361411|ref|XP_009115137.1|/3.38207e-93/PREDICTED: nuclear transcription factor Y subunit A-7 [Brassica rapa]	AT1G30500.2 nuclear factor Y, subunit A7
Bra032775	417	12.315	64.41	2.38687	Up	0.863496	-	-	-	-	gi|674932266|emb|CDY01210.1|/2.19631e-77/BnaA04g06090D [Brassica napus]	AT4G14270.1 Protein containing PAM2 motif which mediates interaction with the PABC domain of polyadenyl binding proteins.
Bra000358	285	49.6	258.695	2.38284	Up	0.879185	-	-	-	-	gi|674950233|emb|CDX83422.1|/1.05561e-32/BnaA03g20840D [Brassica napus]	AT2G44670.1 Protein of unknown function (DUF581)
Bra014368	696	5.73	29.845	2.38088	Up	0.838421	K08064|1|3e-32|136|smo:SELMODRAFT_38090|nuclear transcription factor Y, alpha	GO:0043231//intracellular membrane-bounded organelle	-	GO:0006950//response to stress	gi|685340530|ref|XP_009107067.1|/3.64105e-106/PREDICTED: nuclear transcription factor Y subunit A-5-like isoform X2 [Brassica rapa]	AT1G54160.1 nuclear factor Y, subunit A5
Bra004268	207	6.515	33.73	2.3722	Up	0.843606	-	-	-	-	gi|685335971|ref|XP_009105340.1|/2.64855e-31/PREDICTED: uncharacterized protein LOC103831212 [Brassica rapa]	AT1G67920.1 unknown protein; BEST Arabidopsis thaliana protein match is: unknown protein (TAIR:AT1G24600.1); Has 22 Blast hits to 22 proteins in 5 species: Archae - 0; Bacteria - 0; Metazoa - 0; Fungi - 0; Plants - 22; Viruses - 0; Other Eukaryotes - 0 (source: NCBI BLink).
Bra014491	801	3.125	16.065	2.36199	Up	0.80125	-	-	-	-	gi|685295958|ref|XP_009138836.1|/8.38952e-158/PREDICTED: uncharacterized protein LOC103862883 [Brassica rapa]	AT3G60420.1 Phosphoglycerate mutase family protein
Bra027208	399	17.705	90.99	2.36155	Up	0.868665	-	GO:0044464	-	-	gi|685311252|ref|XP_009146199.1|/3.32302e-73/PREDICTED: uncharacterized protein LOC103869875 [Brassica rapa]	AT3G15760.1 unknown protein; FUNCTIONS IN: molecular_function unknown; INVOLVED IN: biological_process unknown; LOCATED IN: endomembrane system; EXPRESSED IN: 22 plant structures; EXPRESSED DURING: 10 growth stages; BEST Arabidopsis thaliana protein match is: unknown protein (TAIR:AT1G52565.1); Has 42 Blast hits to 42 proteins in 10 species: Archae - 0; Bacteria - 0; Metazoa - 0; Fungi - 0; Plant…
Bra028679	2175	10.36	53.115	2.3581	Up	0.858622	K00901|1|0.0|1383|aly:ARALYDRAFT_487625|diacylglycerol kinase [EC:2.7.1.107]	-	GO:0046872//metal ion binding;GO:0016301//kinase activity	GO:0007186//G-protein coupled receptor signaling pathway;GO:0006796//phosphate-containing compound metabolic process	gi|685269428|ref|XP_009125705.1|/0/PREDICTED: diacylglycerol kinase 1 [Brassica rapa]	AT5G07920.1 diacylglycerol kinase1
Bra015779	588	587.31	3009.08	2.35713	Up	0.883665	-	GO:0016020//membrane;GO:0009536//plastid	GO:0046872//metal ion binding	GO:0009414//response to water deprivation;GO:0009725//response to hormone;GO:0009409//response to cold;GO:0006952//defense response;GO:0009408//response to heat	gi|685338493|ref|XP_009106273.1|/2.71058e-34/PREDICTED: dehydrin ERD14 [Brassica rapa]	AT1G76180.2 Dehydrin family protein
Bra030062	273	16.935	86.455	2.35194	Up	0.867845	-	-	-	-	gi|674848595|emb|CDY72075.1|/5.76067e-22/BnaAnng39790D [Brassica napus]	-
Bra030234	399	3.345	17.07	2.35138	Up	0.805074	-	-	-	-	gi|674907450|emb|CDY25600.1|/4.54622e-28/BnaA04g12920D [Brassica napus]	AT2G22470.1 arabinogalactan protein 2
Bra021028	792	6.045	30.835	2.35075	Up	0.839143	-	-	-	-	gi|685344050|ref|XP_009108347.1|/4.85492e-127/PREDICTED: uncharacterized protein LOC103834041 [Brassica rapa]	AT4G17940.1 Tetratricopeptide repeat (TPR)-like superfamily protein
Bra032681	1518	37.795	192.425	2.34803	Up	0.876461	K13289|1|0.0|860|ath:AT4G12910|cathepsin A (carboxypeptidase C) [EC:3.4.16.5]	GO:0043231//intracellular membrane-bounded organelle	GO:0004180//carboxypeptidase activity	GO:0019538//protein metabolic process	gi|674893092|emb|CDY39716.1|/0/BnaA04g07190D [Brassica napus]	AT4G12910.1 serine carboxypeptidase-like 20
Bra007179	2184	26.285	133.185	2.34112	Up	0.872703	K12657|1|0.0|1233|aly:ARALYDRAFT_485989|delta-1-pyrroline-5-carboxylate synthetase [EC:2.7.2.11 1.2.1.41]	GO:0009536//plastid	GO:0016620//oxidoreductase activity, acting on the aldehyde or oxo group of donors, NAD or NADP as acceptor;GO:0016774//phosphotransferase activity, carboxyl group as acceptor	GO:0009725//response to hormone;GO:0009414//response to water deprivation;GO:0006560//proline metabolic process;GO:0006972//hyperosmotic response;GO:0048513//organ development;GO:0003006//developmental process involved in reproduction	gi|685364101|ref|XP_009116262.1|/0/PREDICTED: delta-1-pyrroline-5-carboxylate synthase B [Brassica rapa]	AT3G55610.1 delta 1-pyrroline-5-carboxylate synthase 2
Bra029946	1032	27.965	140.93	2.33328	Up	0.872916	K01376|1|4e-137|485|ath:AT3G49340|[EC:3.4.22.-];K01365|2|1e-94|344|rcu:RCOM_1043080|cathepsin L [EC:3.4.22.15]	GO:0044464	GO:0004175//endopeptidase activity	GO:0019538//protein metabolic process	gi|674950433|emb|CDX83079.1|/0/BnaA01g20790D [Brassica napus]	AT3G49340.1 Cysteine proteinases superfamily protein
Bra008737	1155	87.925	442.735	2.3321	Up	0.880038	K00122|1|0.0|712|aly:ARALYDRAFT_488325|formate dehydrogenase [EC:1.2.1.2]	GO:0009536//plastid	GO:0016614//oxidoreductase activity, acting on CH-OH group of donors;GO:0000166//nucleotide binding	GO:0006950//response to stress;GO:0008152//metabolic process;GO:0010038//response to metal ion	gi|685377519|ref|XP_009121632.1|/0/PREDICTED: formate dehydrogenase, mitochondrial [Brassica rapa]	AT5G14780.1 formate dehydrogenase
Bra023845	1506	6.29	31.655	2.3313	Up	0.839487	K00818|1|2e-44|178|vcn:VOLCADRAFT_127260|acetylornithine aminotransferase [EC:2.6.1.11];K00819|2|2e-42|172|osa:4333554|ornithine--oxo-acid transaminase [EC:2.6.1.13]	GO:0043231//intracellular membrane-bounded organelle;GO:0031090//organelle membrane	GO:0046914//transition metal ion binding;GO:0003867//4-aminobutyrate transaminase activity;GO:0048037//cofactor binding	GO:0048868//pollen tube development;GO:0048731;GO:0006105//succinate metabolic process;GO:0010038//response to metal ion;GO:0009875//pollen-pistil interaction;GO:0048608//reproductive structure development;GO:0009063//cellular amino acid catabolic process;GO:0006950//response to stress;GO:0000904//cell morphogenesis involved in differentiation	gi|685264323|ref|XP_009109118.1|/0/PREDICTED: gamma-aminobutyrate transaminase POP2, mitochondrial-like [Brassica rapa]	AT3G22200.1 Pyridoxal phosphate (PLP)-dependent transferases superfamily protein
Bra015142	399	4.545	22.855	2.33016	Up	0.823159	K13148|1|6e-09|57.4|vvi:100261060|integrator complex subunit 11 [EC:3.1.27.-];K10601|2|3e-08|55.1|smo:SELMODRAFT_114410|E3 ubiquitin-protein ligase synoviolin [EC:6.3.2.19]	-	GO:0005488//binding	GO:0009725//response to hormone;GO:0006970//response to osmotic stress;GO:0009743//response to carbohydrate;GO:0006714//sesquiterpenoid metabolic process	gi|674905148|emb|CDY27877.1|/1.01914e-63/BnaA07g04670D [Brassica napus]	AT2G04240.2 RING/U-box superfamily protein
Bra006879	1320	53.325	267.89	2.32876	Up	0.878151	K00232|1|0.0|822|ath:AT3G51840|acyl-CoA oxidase [EC:1.3.3.6]	GO:0042579//microbody	GO:0050662//coenzyme binding;GO:0016634	GO:0009062//fatty acid catabolic process;GO:0003006//developmental process involved in reproduction	gi|685363206|ref|XP_009115886.1|/0/PREDICTED: acyl-coenzyme A oxidase 4, peroxisomal [Brassica rapa]	AT3G51840.1 acyl-CoA oxidase 4
Bra029364	597	12.945	64.985	2.32771	Up	0.862233	-	-	GO:0016811//hydrolase activity, acting on carbon-nitrogen (but not peptide) bonds, in linear amides	GO:0046496//nicotinamide nucleotide metabolic process	gi|685278355|ref|XP_009130121.1|/3.703e-106/PREDICTED: uncharacterized protein LOC103854907 [Brassica rapa]	AT5G23230.1 nicotinamidase 2
Bra008356	870	5.375	26.88	2.3222	Up	0.831101	-	-	-	-	gi|674906187|emb|CDY26860.1|/2.58141e-87/BnaA02g18850D [Brassica napus]	AT1G78310.1 VQ motif-containing protein
Bra002268	372	9.645	48.23	2.32208	Up	0.854667	-	-	-	GO:0006950//response to stress	gi|685375607|ref|XP_009120852.1|/4.87105e-36/PREDICTED: uncharacterized protein LOC103845716 [Brassica rapa]	AT5G19875.1 unknown protein; FUNCTIONS IN: molecular_function unknown; INVOLVED IN: response to oxidative stress; LOCATED IN: endomembrane system; EXPRESSED IN: 21 plant structures; EXPRESSED DURING: 13 growth stages; BEST Arabidopsis thaliana protein match is: unknown protein (TAIR:AT2G31940.1); Has 30201 Blast hits to 17322 proteins in 780 species: Archae - 12; Bacteria - 1396; Metazoa - 17338;…
Bra019416	879	21.765	108.675	2.31994	Up	0.869749	K08235|1|4e-139|491|ath:AT3G44990|xyloglucan:xyloglucosyl transferase [EC:2.4.1.207]	GO:0005576//extracellular region;GO:0030312//external encapsulating structure	GO:0016798//hydrolase activity, acting on glycosyl bonds;GO:0016758//transferase activity, transferring hexosyl groups	GO:0044042//glucan metabolic process	gi|685320496|ref|XP_009150317.1|/7.74111e-162/PREDICTED: probable xyloglucan endotransglucosylase/hydrolase protein 31 [Brassica rapa]	AT3G44990.1 xyloglucan endo-transglycosylase-related 8
Bra017722	2862	4.005	19.955	2.31688	Up	0.814822	K08518|1|1e-44|180|smo:SELMODRAFT_449132|syntaxin-binding protein 5	-	-	-	gi|685294979|ref|XP_009138377.1|/0/PREDICTED: uncharacterized protein LOC103862418 isoform X2 [Brassica rapa]	AT4G35560.1 Transducin/WD40 repeat-like superfamily protein
Bra030154	411	43.915	218.605	2.31554	Up	0.876477	-	-	-	-	gi|685329540|ref|XP_009102835.1|/1.30894e-73/PREDICTED: uncharacterized protein LOC103828949 [Brassica rapa]	AT1G29640.1 Protein of unknown function, DUF584
Bra023339	195	41.42	205.77	2.31263	Up	0.875131	-	-	-	-	-	-
Bra014339	456	11.67	57.94	2.31176	Up	0.858458	K11982|1|8e-08|54.3|vvi:100262515|E3 ubiquitin-protein ligase RNF115/126 [EC:6.3.2.19];K15692|2|1e-07|53.5|sbi:SORBI_06g034040|E3 ubiquitin-protein ligase RNF13 [EC:6.3.2.19];K10601|4|4e-07|52.0|osa:4340826|E3 ubiquitin-protein ligase synoviolin [EC:6.3.2.19]	-	GO:0046872//metal ion binding;GO:0019787//small conjugating protein transferase activity	GO:0032446//protein modification by small protein conjugation;GO:0006970//response to osmotic stress;GO:0009738//abscisic acid-activated signaling pathway;GO:0080134	gi|685340617|ref|XP_009107102.1|/7.22662e-66/PREDICTED: probable E3 ubiquitin-protein ligase RHA2B [Brassica rapa]	AT2G01150.1 RING-H2 finger protein 2B
Bra032144	981	4.33	21.44	2.30787	Up	0.818203	-	-	-	-	gi|685299490|ref|XP_009140496.1|/4.0407e-178/PREDICTED: uncharacterized protein LOC103864494 [Brassica rapa]	AT2G23790.1 Protein of unknown function (DUF607)
Bra026794	444	39.38	193.615	2.29766	Up	0.874409	-	GO:0016020//membrane;GO:0043231//intracellular membrane-bounded organelle	-	GO:0006950//response to stress	gi|685367803|ref|XP_009117862.1|/3.31476e-70/PREDICTED: protein PLANT CADMIUM RESISTANCE 2-like [Brassica rapa]	AT1G14870.1 PLANT CADMIUM RESISTANCE 2
Bra020240	1479	4.33	21.25	2.29502	Up	0.817415	K10661|1|6e-08|57.0|smo:SELMODRAFT_50521|E3 ubiquitin-protein ligase MARCH6 [EC:6.3.2.19]	-	GO:0046914//transition metal ion binding	-	gi|685271107|ref|XP_009126592.1|/0/PREDICTED: uncharacterized protein LOC103851495 isoform X1 [Brassica rapa]	AT5G60580.3 RING/U-box superfamily protein
Bra026341	987	167.305	821.03	2.29495	Up	0.880071	-	GO:0031225//anchored component of membrane;GO:0005576//extracellular region;GO:0009536//plastid	GO:0046914//transition metal ion binding	-	gi|674914195|emb|CDY19056.1|/5.46452e-64/BnaC01g20120D [Brassica napus]	AT4G27520.1 early nodulin-like protein 2
Bra011537	1521	60.6	296.375	2.29003	Up	0.877051	K14489|1|2e-14|78.6|vvi:100263145|arabidopsis histidine kinase 2/3/4 (cytokinin receptor) [EC:2.7.13.3]	GO:0044464	GO:0043167//ion binding;GO:0008422//beta-glucosidase activity	GO:0044238	gi|685256912|ref|XP_009112198.1|/0/PREDICTED: glucan endo-1,3-beta-glucosidase 7 [Brassica rapa]	AT4G34480.1 O-Glycosyl hydrolases family 17 protein
Bra018998	1152	24.94	121.525	2.28472	Up	0.869699	-	GO:0043231//intracellular membrane-bounded organelle	GO:0003676//nucleic acid binding;GO:0001071//nucleic acid binding transcription factor activity;GO:0046983//protein dimerization activity	GO:0032501//multicellular organismal process;GO:0006950//response to stress;GO:0010467//gene expression;GO:0007165//signal transduction	gi|685314102|ref|XP_009147649.1|/7.53744e-178/PREDICTED: NAC domain-containing protein 19 [Brassica rapa]	AT1G52890.1 NAC domain containing protein 19
Bra027406	546	24.185	117.73	2.2833	Up	0.86924	-	GO:0043231//intracellular membrane-bounded organelle	GO:0005488//binding	GO:0006810//transport	gi|685311791|ref|XP_009146459.1|/2.86819e-86/PREDICTED: PRA1 family protein F3 [Brassica rapa]	AT3G13710.1 prenylated RAB acceptor 1.F4
Bra017469	1299	14.925	72.46	2.27945	Up	0.862364	K00626|1|0.0|750|ath:AT5G47720|acetyl-CoA C-acetyltransferase [EC:2.3.1.9]	-	GO:0016453	-	gi|674891699|emb|CDY41065.1|/0/BnaA09g18440D [Brassica napus]	AT5G47720.4 Thiolase family protein
Bra016948	4881	4.665	22.57	2.27446	Up	0.820402	K00284|1|0.0|3071|aly:ARALYDRAFT_483191|glutamate synthase (ferredoxin) [EC:1.4.7.1]	GO:0009526//plastid envelope	GO:0015930//glutamate synthase activity	GO:0006536//glutamate metabolic process	gi|685302540|ref|XP_009141973.1|/0/PREDICTED: ferredoxin-dependent glutamate synthase 2, chloroplastic-like [Brassica rapa]	AT2G41220.1 glutamate synthase 2
Bra024311	2343	11.195	54.035	2.27104	Up	0.856144	K15920|1|0.0|1478|aly:ARALYDRAFT_496670|beta-D-xylosidase 4 [EC:3.2.1.37]	GO:0005576//extracellular region;GO:0030312//external encapsulating structure	GO:0004553//hydrolase activity, hydrolyzing O-glycosyl compounds	GO:0000272//polysaccharide catabolic process	gi|685321044|ref|XP_009150540.1|/0/PREDICTED: beta-D-xylosidase 4 [Brassica rapa]	AT5G64570.1 beta-D-xylosidase 4
Bra018019	1545	28.46	137.365	2.27101	Up	0.870832	K01904|1|8e-46|183|sbi:SORBI_01g016420|4-coumarate--CoA ligase [EC:6.2.1.12]	GO:0005576//extracellular region;GO:0009536//plastid	GO:0003824//catalytic activity;GO:0032559	GO:0010038//response to metal ion	gi|685318849|ref|XP_009149776.1|/0/PREDICTED: 4-coumarate--CoA ligase-like 10 [Brassica rapa]	AT3G48990.1 AMP-dependent synthetase and ligase family protein
Bra011545	540	36.725	176.645	2.26602	Up	0.87331	K04371|1|6e-32|134|vvi:100254083|extracellular signal-regulated kinase 1/2 [EC:2.7.11.24];K09060|2|1e-07|54.3|vvi:100243644|plant G-box-binding factor	GO:0043231//intracellular membrane-bounded organelle	GO:0001071//nucleic acid binding transcription factor activity;GO:0003677//DNA binding;GO:0046983//protein dimerization activity	GO:0032055//negative regulation of translation in response to stress;GO:0034285;GO:0006351//transcription, DNA-templated	gi|674958053|emb|CDX75445.1|/3.6432e-63/BnaA01g02570D [Brassica napus]	AT4G34590.1 G-box binding factor 6
Bra012337	831	9.525	45.8	2.26556	Up	0.851451	K09422|1|8e-101|364|ath:AT1G22640|myb proto-oncogene protein, plant	-	GO:0005488//binding;GO:0001071//nucleic acid binding transcription factor activity	GO:0009725//response to hormone;GO:0006970//response to osmotic stress;GO:0009699//phenylpropanoid biosynthetic process;GO:0006351//transcription, DNA-templated	gi|685330568|ref|XP_009103226.1|/1.25121e-142/PREDICTED: transcription factor MYB3-like [Brassica rapa]	AT1G22640.1 myb domain protein 3
Bra018922	195	23.19	110.9	2.25768	Up	0.868239	-	-	-	-	gi|674899088|emb|CDY33881.1|/1.48215e-09/BnaC06g04720D [Brassica napus]	-
Bra026154	627	3.87	18.395	2.24891	Up	0.806748	K02200|1|1e-77|287|aly:ARALYDRAFT_471717|cytochrome c-type biogenesis protein CcmH	GO:0019866//organelle inner membrane;GO:0043231//intracellular membrane-bounded organelle;GO:0032991//macromolecular complex	GO:0005488//binding;GO:0003824//catalytic activity	GO:0007275//multicellular organismal development	gi|674896298|emb|CDY36537.1|/5.51879e-115/BnaA06g09900D [Brassica napus]	AT1G15220.2 cytochrome c biogenesis protein family
Bra000060	1431	8.59	40.805	2.24802	Up	0.846921	K00827|1|0.0|913|ath:AT2G38400|alanine-glyoxylate transaminase / (R)-3-amino-2-methylpropionate-pyruvate transaminase [EC:2.6.1.44 2.6.1.40]	-	GO:0048037//cofactor binding;GO:0008483//transaminase activity	-	gi|685284703|ref|XP_009133253.1|/0/PREDICTED: alanine--glyoxylate aminotransferase 2 homolog 2, mitochondrial [Brassica rapa]	AT2G38400.1 alanine:glyoxylate aminotransferase 3
Bra014655	1146	8.69	41.16	2.24381	Up	0.846806	K01757|1|1e-43|175|ath:AT1G74020|strictosidine synthase [EC:4.3.3.2]	GO:0043231//intracellular membrane-bounded organelle	GO:0016843	GO:0009820//alkaloid metabolic process	gi|685296426|ref|XP_009139053.1|/0/PREDICTED: strictosidine synthase 3-like [Brassica rapa]	AT3G57010.1 Calcium-dependent phosphotriesterase superfamily protein
Bra020180	267	3.665	17.295	2.23847	Up	0.801529	-	-	-	-	gi|685270988|ref|XP_009126530.1|/6.95726e-25/PREDICTED: uncharacterized protein LOC103851430 [Brassica rapa]	AT5G22270.1 unknown protein; BEST Arabidopsis thaliana protein match is: unknown protein (TAIR:AT3G11600.1); Has 136 Blast hits to 136 proteins in 15 species: Archae - 0; Bacteria - 0; Metazoa - 0; Fungi - 0; Plants - 136; Viruses - 0; Other Eukaryotes - 0 (source: NCBI BLink).
Bra036226	1194	5.955	28.1	2.2384	Up	0.830527	K13420|1|8e-29|125|rcu:RCOM_0633880|LRR receptor-like serine/threonine-protein kinase FLS2 [EC:2.7.11.1]	-	-	GO:0023052//signaling	gi|685351648|ref|XP_009111240.1|/0/PREDICTED: LRR receptor-like serine/threonine-protein kinase ERL1 [Brassica rapa]	AT4G03010.1 RNI-like superfamily protein
Bra033245	1485	4.085	19.255	2.23683	Up	0.809407	K09597|1|0.0|721|mtr:MTR_7g077800|signal peptide peptidase-like 2B [EC:3.4.23.-]	GO:0031224//intrinsic component of membrane	GO:0004175//endopeptidase activity	GO:0019538//protein metabolic process	gi|685372211|ref|XP_009119715.1|/0/PREDICTED: signal peptide peptidase-like 4 [Brassica rapa]	AT1G01650.1 SIGNAL PEPTIDE PEPTIDASE-LIKE 4
Bra006975	2544	19.77	92.94	2.23299	Up	0.86476	-	-	GO:0016211;GO:0032559	GO:0009725//response to hormone;GO:0006541//glutamine metabolic process;GO:0071941	gi|674955423|emb|CDX78151.1|/0/BnaA09g33460D [Brassica napus]	AT3G53180.1 glutamate-ammonia ligases;catalytics;glutamate-ammonia ligases
Bra023137	1803	4.615	21.685	2.23229	Up	0.816381	K01937|1|0.0|1100|aly:ARALYDRAFT_473316|CTP synthase [EC:6.3.4.2]	-	GO:0016879//ligase activity, forming carbon-nitrogen bonds	GO:0006220//pyrimidine nucleotide metabolic process	gi|685361218|ref|XP_009115042.1|/0/PREDICTED: CTP synthase [Brassica rapa]	AT1G30820.1 CTP synthase family protein
Bra038521	399	13.975	65.525	2.2292	Up	0.859229	-	-	-	-	-	-
Bra019545	1149	6.565	30.675	2.2242	Up	0.834055	K00514|1|8e-45|179|rcu:RCOM_1428040|zeta-carotene desaturase [EC:1.3.5.6];K01206|2|1e-28|125|ath:AT1G67830|alpha-L-fucosidase [EC:3.2.1.51]	GO:0044464	GO:0016787//hydrolase activity	GO:0044238	gi|685320084|ref|XP_009150194.1|/0/PREDICTED: GDSL esterase/lipase At3g48460-like [Brassica rapa]	AT3G48460.1 GDSL-like Lipase/Acylhydrolase superfamily protein
Bra014456	861	6.45	30.06	2.22047	Up	0.833005	-	-	GO:0005488//binding	GO:0006950//response to stress	gi|685295867|ref|XP_009138794.1|/6.35016e-169/PREDICTED: F-box protein PP2-A13 [Brassica rapa]	AT3G61060.1 phloem protein 2-A13
Bra010632	423	13.27	61.78	2.21897	Up	0.85726	-	-	-	-	gi|674943337|emb|CDX90386.1|/1.05873e-66/BnaA08g15980D [Brassica napus]	AT4G38060.2 unknown protein; BEST Arabidopsis thaliana protein match is: unknown protein (TAIR:AT5G65480.1); Has 35333 Blast hits to 34131 proteins in 2444 species: Archae - 798; Bacteria - 22429; Metazoa - 974; Fungi - 991; Plants - 531; Viruses - 0; Other Eukaryotes - 9610 (source: NCBI BLink).
Bra000670	381	14.99	69.63	2.21571	Up	0.859656	-	-	-	-	-	-
Bra001565	2529	5.895	27.345	2.21371	Up	0.827622	-	GO:0016020//membrane	-	-	gi|685288889|ref|XP_009135395.1|/0/PREDICTED: mechanosensitive ion channel protein 5 [Brassica rapa]	AT3G14810.1 mechanosensitive channel of small conductance-like 5
Bra018589	663	5.89	27.305	2.21283	Up	0.827458	K03506|1|9e-08|55.1|olu:OSTLU_19031|DNA polymerase epsilon subunit 4 [EC:2.7.7.7];K03004|2|2e-06|50.8|ota:Ot14g01850|DNA-directed RNA polymerase I subunit RPA43	GO:0043231//intracellular membrane-bounded organelle	GO:0003677//DNA binding;GO:0001071//nucleic acid binding transcription factor activity	GO:0006351//transcription, DNA-templated	gi|674939845|emb|CDX93525.1|/9.16246e-73/BnaA06g05230D [Brassica napus]	AT1G08970.2 nuclear factor Y, subunit C9
Bra020404	615	5.18	23.995	2.21171	Up	0.820828	-	-	-	-	gi|685271518|ref|XP_009126805.1|/2.18877e-86/PREDICTED: uncharacterized protein LOC103851676 [Brassica rapa]	AT5G57910.1 unknown protein; BEST Arabidopsis thaliana protein match is: unknown protein (TAIR:AT4G30630.1); Has 30201 Blast hits to 17322 proteins in 780 species: Archae - 12; Bacteria - 1396; Metazoa - 17338; Fungi - 3422; Plants - 5037; Viruses - 0; Other Eukaryotes - 2996 (source: NCBI BLink).
Bra025654	567	16.565	76.67	2.21052	Up	0.860952	K13448|1|4e-14|75.5|ath:AT3G47480|calcium-binding protein CML	-	GO:0046872//metal ion binding	-	gi|685298241|ref|XP_009139912.1|/5.46819e-81/PREDICTED: probable calcium-binding protein CML45 [Brassica rapa]	AT5G39670.1 Calcium-binding EF-hand family protein
Bra030931	729	4.68	21.65	2.20979	Up	0.815232	K01069|1|3e-16|83.2|gmx:100527131|hydroxyacylglutathione hydrolase [EC:3.1.2.6]	-	GO:0016790//thiolester hydrolase activity	GO:0006970//response to osmotic stress;GO:0006089//lactate metabolic process	gi|685340310|ref|XP_009106968.1|/1.68349e-132/PREDICTED: persulfide dioxygenase ETHE1 homolog, mitochondrial-like [Brassica rapa]	AT1G53580.1 glyoxalase II 3
Bra004657	813	43.45	200.79	2.20826	Up	0.872062	K08818|1|1e-06|51.2|vvi:100246062|cell division cycle 2-like [EC:2.7.11.22]	-	-	-	gi|685304144|ref|XP_009142787.1|/1.08053e-131/PREDICTED: remorin [Brassica rapa]	AT2G41870.1 Remorin family protein
Bra015922	2736	6.28	28.945	2.20448	Up	0.830445	K03695|1|0.0|1455|bdi:100825913|ATP-dependent Clp protease ATP-binding subunit ClpB	-	GO:0017111//nucleoside-triphosphatase activity;GO:0032559	GO:0009642//response to light intensity;GO:0044267//cellular protein metabolic process;GO:0000302//response to reactive oxygen species	gi|685338009|ref|XP_009106088.1|/0/PREDICTED: chaperone protein ClpB1 [Brassica rapa]	AT1G74310.1 heat shock protein 101
Bra010038	2319	9.485	43.645	2.2021	Up	0.847118	K05349|1|0.0|995|vvi:100252178|beta-glucosidase [EC:3.2.1.21]	GO:0005576//extracellular region;GO:0005618//cell wall	GO:0004553//hydrolase activity, hydrolyzing O-glycosyl compounds	GO:0044238;GO:0003006//developmental process involved in reproduction	gi|685323112|ref|XP_009151303.1|/0/PREDICTED: beta-D-xylosidase 1 [Brassica rapa]	AT5G49360.1 beta-xylosidase 1
Bra038876	984	13.235	60.68	2.19686	Up	0.85621	-	-	GO:0016803	-	gi|674899675|emb|CDY33304.1|/0/BnaA01g19710D [Brassica napus]	AT3G51000.1 alpha/beta-Hydrolases superfamily protein
Bra010324	918	4.67	21.34	2.19207	Up	0.813739	-	GO:0016020//membrane	-	-	gi|674929760|emb|CDY03573.1|/6.40957e-128/BnaC03g68320D [Brassica napus]	AT4G29520.1 LOCATED IN: endoplasmic reticulum, plasma membrane; EXPRESSED IN: 23 plant structures; EXPRESSED DURING: 14 growth stages; CONTAINS InterPro DOMAIN/s: Saposin B (InterPro:IPR008139); Has 137 Blast hits to 137 proteins in 50 species: Archae - 2; Bacteria - 0; Metazoa - 41; Fungi - 10; Plants - 36; Viruses - 0; Other Eukaryotes - 48 (source: NCBI BLink).
Bra028707	960	5.58	25.47	2.19046	Up	0.823241	K13424|1|1e-78|291|rcu:RCOM_0849600|WRKY transcription factor 33	-	GO:0003677//DNA binding	GO:0006351//transcription, DNA-templated	gi|688954447|ref|NP_001288922.1|/0/probable WRKY transcription factor 26 [Brassica rapa]	AT5G07100.1 WRKY DNA-binding protein 26
Bra025258	606	14.455	65.825	2.18707	Up	0.8579	-	GO:0016020//membrane	GO:0005488//binding	-	gi|685324823|ref|XP_009151982.1|/2.11771e-68/PREDICTED: uncharacterized protein At3g27210 isoform X1 [Brassica rapa]	AT3G27210.1 unknown protein; FUNCTIONS IN: molecular_function unknown; INVOLVED IN: N-terminal protein myristoylation; LOCATED IN: plasma membrane; EXPRESSED IN: 22 plant structures; EXPRESSED DURING: 13 growth stages; BEST Arabidopsis thaliana protein match is: unknown protein (TAIR:AT5G40860.1); Has 133 Blast hits to 98 proteins in 25 species: Archae - 0; Bacteria - 6; Metazoa - 32; Fungi - 7; …
Bra037578	585	6.075	27.585	2.18293	Up	0.827097	-	-	-	-	gi|674914641|emb|CDY18526.1|/5.5136e-98/BnaA01g26690D [Brassica napus]	AT3G18560.1 unknown protein; BEST Arabidopsis thaliana protein match is: unknown protein (TAIR:AT1G49000.1); Has 95 Blast hits to 95 proteins in 13 species: Archae - 0; Bacteria - 0; Metazoa - 0; Fungi - 0; Plants - 95; Viruses - 0; Other Eukaryotes - 0 (source: NCBI BLink).
Bra037344	1626	4.83	21.93	2.18281	Up	0.815035	K01177|1|0.0|935|aly:ARALYDRAFT_490517|beta-amylase [EC:3.2.1.2]	GO:0009536//plastid;GO:0016020//membrane	GO:0016160//amylase activity;GO:0004672//protein kinase activity;GO:0005102//receptor binding;GO:0043167//ion binding;GO:0032559	GO:0009933//meristem structural organization;GO:0007167//enzyme linked receptor protein signaling pathway;GO:0010073//meristem maintenance;GO:0005976//polysaccharide metabolic process;GO:0003006//developmental process involved in reproduction;GO:0006464//cellular protein modification process	gi|685352228|ref|XP_009111477.1|/0/PREDICTED: beta-amylase 2, chloroplastic [Brassica rapa]	AT4G00490.1 beta-amylase 2
Bra029040	255	7.875	35.605	2.17673	Up	0.839077	-	-	-	-	gi|674889682|emb|CDY43051.1|/1.79053e-28/BnaA03g11980D [Brassica napus]	AT5G54165.1 unknown protein; FUNCTIONS IN: molecular_function unknown; INVOLVED IN: biological_process unknown; LOCATED IN: cellular_component unknown; Has 30201 Blast hits to 17322 proteins in 780 species: Archae - 12; Bacteria - 1396; Metazoa - 17338; Fungi - 3422; Plants - 5037; Viruses - 0; Other Eukaryotes - 2996 (source: NCBI BLink).
Bra009464	687	3.925	17.735	2.17583	Up	0.800725	-	GO:0043231//intracellular membrane-bounded organelle	GO:0005488//binding	GO:0009725//response to hormone;GO:0009642//response to light intensity;GO:0006970//response to osmotic stress;GO:0044237//cellular metabolic process;GO:0009743//response to carbohydrate;GO:0040007//growth	gi|685379857|ref|XP_009122614.1|/6.53968e-87/PREDICTED: zinc finger protein ZAT6 [Brassica rapa]	AT5G04340.1 zinc finger of Arabidopsis thaliana 6
Bra038608	585	6.825	30.835	2.17567	Up	0.832808	-	-	-	-	gi|685320626|ref|XP_009150371.1|/7.59043e-89/PREDICTED: uncharacterized protein LOC103873733 [Brassica rapa]	AT5G63130.1 Octicosapeptide/Phox/Bem1p family protein
Bra000265	390	78.33	353.685	2.17483	Up	0.874163	K08917|1|5e-09|57.4|ath:AT1G15820|light-harvesting complex II chlorophyll a/b binding protein 6	GO:0009526//plastid envelope;GO:0009532//plastid stroma	-	GO:0006952//defense response	gi|685285265|ref|XP_009133541.1|/1.10893e-66/PREDICTED: uncharacterized protein LOC103858020 [Brassica rapa]	AT2G42530.1 cold regulated 15b
Bra024073	912	19.305	86.655	2.16631	Up	0.861609	K09753|1|2e-35|147|bdi:100832790|cinnamoyl-CoA reductase [EC:1.2.1.44]	-	GO:0016620//oxidoreductase activity, acting on the aldehyde or oxo group of donors, NAD or NADP as acceptor;GO:0048037//cofactor binding	GO:0009628//response to abiotic stimulus;GO:0009699//phenylpropanoid biosynthetic process	gi|674960784|emb|CDX72244.1|/1.76621e-160/BnaC07g42660D [Brassica napus]	AT4G30470.1 NAD(P)-binding Rossmann-fold superfamily protein
Bra022244	1014	11.76	52.68	2.16337	Up	0.851254	K01078|1|3e-114|409|ath:AT1G14700|acid phosphatase [EC:3.1.3.2]	GO:0044464	GO:0016791//phosphatase activity	GO:0072502;GO:0006796//phosphate-containing compound metabolic process;GO:0000302//response to reactive oxygen species	gi|295854819|gb|ADG45866.1|/0/purple acid phosphatase 17 isoform 1 [Brassica rapa]	AT3G17790.1 purple acid phosphatase 17
Bra024257	1086	6.99	31.22	2.15911	Up	0.832267	K15422|1|9e-164|574|ath:AT5G64000|3'(2'), 5'-bisphosphate nucleotidase / inositol polyphosphate 1-phosphatase [EC:3.1.3.7 3.1.3.57]	-	GO:0008252//nucleotidase activity	GO:0044237//cellular metabolic process	gi|685320876|ref|XP_009150468.1|/0/PREDICTED: SAL2 phosphatase [Brassica rapa]	AT5G64000.1 Inositol monophosphatase family protein
Bra024926	849	7.45	33.12	2.15239	Up	0.834088	-	GO:0044444	GO:0019144//ADP-sugar diphosphatase activity;GO:0000166//nucleotide binding	GO:0006950//response to stress	gi|685325881|ref|XP_009101398.1|/1.74447e-162/PREDICTED: nudix hydrolase 2-like isoform X1 [Brassica rapa]	AT5G47650.1 nudix hydrolase homolog 2
Bra020157	1554	19.835	88.155	2.15199	Up	0.860542	K00279|1|0.0|958|aly:ARALYDRAFT_489034|cytokinin dehydrogenase [EC:1.5.99.12]	-	GO:0016645//oxidoreductase activity, acting on the CH-NH group of donors;GO:0050662//coenzyme binding	GO:0009690//cytokinin metabolic process	gi|674924050|emb|CDY09108.1|/0/BnaA02g05340D [Brassica napus]	AT5G21482.1 cytokinin oxidase 7
Bra014154	294	2892.79	12812.3	2.14699	Up	0.876674	-	-	-	-	gi|685341223|ref|XP_009107339.1|/4.10822e-33/PREDICTED: non-specific lipid-transfer protein 2-like [Brassica rapa]	AT1G48750.1 Bifunctional inhibitor/lipid-transfer protein/seed storage 2S albumin superfamily protein
Bra000536	1137	9.86	43.665	2.14682	Up	0.844607	-	GO:0031224//intrinsic component of membrane	GO:0016798//hydrolase activity, acting on glycosyl bonds;GO:0043167//ion binding	GO:0044238	gi|685286026|ref|XP_009133932.1|/0/PREDICTED: glucan endo-1,3-beta-glucosidase 11 [Brassica rapa]	AT2G26600.1 Glycosyl hydrolase superfamily protein
Bra014265	1296	16.44	72.435	2.13948	Up	0.856915	K07088|1|2e-45|181|rcu:RCOM_0875040|	GO:0031224//intrinsic component of membrane	-	GO:0060918//auxin transport	gi|685340875|ref|XP_009107207.1|/0/PREDICTED: uncharacterized protein LOC103832859 [Brassica rapa]	AT5G01990.1 Auxin efflux carrier family protein
Bra040264	1122	7.33	32.23	2.13652	Up	0.832234	-	-	GO:0046914//transition metal ion binding;GO:0016787//hydrolase activity	GO:0019941//modification-dependent protein catabolic process	gi|685382095|ref|XP_009123538.1|/4.4838e-45/PREDICTED: uncharacterized protein LOC103848372 isoform X1 [Brassica rapa]	AT4G15420.1 Ubiquitin fusion degradation UFD1 family protein
Bra016073	672	20.565	90.15	2.13214	Up	0.860066	-	-	GO:0061135	GO:0010466//negative regulation of peptidase activity	gi|685337420|ref|XP_009105887.1|/2.95232e-115/PREDICTED: kunitz-type serine protease inhibitor DrTI [Brassica rapa]	AT1G72290.1 Kunitz family trypsin and protease inhibitor protein
Bra029392	1557	15.44	67.58	2.12992	Up	0.855242	K00511|1|0.0|776|aly:ARALYDRAFT_662237|squalene monooxygenase [EC:1.14.13.132]	GO:0031224//intrinsic component of membrane	GO:0004497//monooxygenase activity;GO:0050662//coenzyme binding	GO:0006694//steroid biosynthetic process	gi|685278289|ref|XP_009130085.1|/0/PREDICTED: squalene epoxidase 5-like isoform X2 [Brassica rapa]	AT5G24150.1 FAD/NAD(P)-binding oxidoreductase family protein
Bra039004	882	8.63	37.535	2.1208	Up	0.837912	K01489|1|2e-133|473|ath:AT2G19570|cytidine deaminase [EC:3.5.4.5]	GO:0044444	GO:0046914//transition metal ion binding;GO:0016814//hydrolase activity, acting on carbon-nitrogen (but not peptide) bonds, in cyclic amidines	GO:0006216//cytidine catabolic process	gi|685327725|ref|XP_009102151.1|/2.81596e-160/PREDICTED: cytidine deaminase 1 [Brassica rapa]	AT2G19570.1 cytidine deaminase 1
Bra036764	954	78.65	341.745	2.1194	Up	0.87157	-	GO:0030312//external encapsulating structure;GO:0009532//plastid stroma;GO:0031090//organelle membrane;GO:0005576//extracellular region	GO:0046914//transition metal ion binding;GO:0005543//phospholipid binding;GO:0042802//identical protein binding;GO:0016209//antioxidant activity;GO:0032559	GO:0010038//response to metal ion;GO:0009725//response to hormone;GO:0006970//response to osmotic stress	gi|685342811|ref|XP_009107912.1|/2.40161e-170/PREDICTED: annexin D1 [Brassica rapa]	AT1G35720.1 annexin 1
Bra007705	1482	9.02	39.165	2.11837	Up	0.839323	K01710|1|2e-98|358|cme:CME136C|dTDP-glucose 4,6-dehydratase [EC:4.2.1.46];K12450|2|4e-17|87.4|pop:POPTR_583125|UDP-glucose 4,6-dehydratase [EC:4.2.1.76];K10046|3|5e-17|87.4|smo:SELMODRAFT_157784|GDP-D-mannose 3', 5'-epimerase [EC:5.1.3.18 5.1.3.-]	GO:0012505//endomembrane system;GO:0031090//organelle membrane;GO:0043231//intracellular membrane-bounded organelle	GO:0016831//carboxy-lyase activity;GO:0048037//cofactor binding;GO:0016836//hydro-lyase activity	GO:0019321//pentose metabolic process;GO:0009226//nucleotide-sugar biosynthetic process	gi|567182250|ref|XP_006402337.1|/0/hypothetical protein EUTSA_v10005973mg [Eutrema salsugineum]	AT3G62830.2 NAD(P)-binding Rossmann-fold superfamily protein
Bra008924	651	9.5	41.24	2.11804	Up	0.841407	K06966|1|9e-98|353|gmx:100306704|	GO:0043231//intracellular membrane-bounded organelle;GO:0044444	GO:0003824//catalytic activity	-	gi|674963485|emb|CDX69717.1|/4.14981e-124/BnaA10g20660D [Brassica napus]	AT5G11950.2 Putative lysine decarboxylase family protein
Bra022609	354	11.88	51.54	2.11716	Up	0.848464	-	-	-	-	gi|685272304|ref|XP_009127217.1|/4.83856e-41/PREDICTED: uncharacterized protein LOC103852078 [Brassica rapa]	AT5G52750.1 Heavy metal transport/detoxification superfamily protein
Bra040260	1095	14.515	62.945	2.11655	Up	0.853322	K14432|1|6e-123|438|ath:AT1G45249|ABA responsive element binding factor	GO:0043231//intracellular membrane-bounded organelle	GO:0005488//binding;GO:0001071//nucleic acid binding transcription factor activity	GO:0009757//hexose mediated signaling;GO:0006970//response to osmotic stress;GO:0009755//hormone-mediated signaling pathway	gi|685382076|ref|XP_009123528.1|/3.18946e-167/PREDICTED: ABSCISIC ACID-INSENSITIVE 5-like protein 5 isoform X1 [Brassica rapa]	AT1G45249.1 abscisic acid responsive elements-binding factor 2
Bra039946	249	121.67	526.355	2.11306	Up	0.872637	-	GO:0016020//membrane	-	-	gi|674882988|emb|CDY49449.1|/2.81187e-17/BnaA09g42180D [Brassica napus]	AT2G23120.1 Late embryogenesis abundant protein, group 6
Bra007722	1077	15.265	65.92	2.11049	Up	0.854142	K14493|1|0.0|674|ath:AT3G63010|gibberellin receptor GID1 [EC:3.-.-.-]	-	GO:0005488//binding;GO:0003824//catalytic activity	GO:0009312//oligosaccharide biosynthetic process;GO:0003006//developmental process involved in reproduction;GO:0009740//gibberellic acid mediated signaling pathway	gi|685365736|ref|XP_009116970.1|/0/PREDICTED: gibberellin receptor GID1B-like [Brassica rapa]	AT3G63010.1 alpha/beta-Hydrolases superfamily protein
Bra006543	771	39.955	172.235	2.10793	Up	0.866778	-	GO:0043231//intracellular membrane-bounded organelle	-	GO:0010647//positive regulation of cell communication;GO:0009267//cellular response to starvation	gi|674944789|emb|CDX88856.1|/2.14083e-131/BnaA03g07930D [Brassica napus]	AT5G20150.1 SPX domain gene 1
Bra018071	552	7.145	30.77	2.10652	Up	0.82887	-	-	-	-	gi|685319019|ref|XP_009149832.1|/5.98378e-82/PREDICTED: uncharacterized protein LOC103873161 [Brassica rapa]	AT3G48240.1 Octicosapeptide/Phox/Bem1p family protein
Bra004624	1269	4.355	18.73	2.10461	Up	0.800397	K01001|1|0.0|687|ath:AT2G41490|UDP-N-acetylglucosamine--dolichyl-phosphate N-acetylglucosaminephosphotransferase [EC:2.7.8.15]	GO:0043231//intracellular membrane-bounded organelle;GO:0031224//intrinsic component of membrane	GO:0016780//phosphotransferase activity, for other substituted phosphate groups	GO:0005976//polysaccharide metabolic process	gi|685304075|ref|XP_009142749.1|/0/PREDICTED: UDP-N-acetylglucosamine--dolichyl-phosphate N-acetylglucosaminephosphotransferase [Brassica rapa]	AT2G41490.1 UDP-glcnac-adolichol phosphate glcnac-1-p-transferase
Bra017350	762	4.79	20.49	2.09682	Up	0.806436	K10525|1|3e-127|452|aly:ARALYDRAFT_484340|allene oxide cyclase [EC:5.3.99.6]	GO:0009526//plastid envelope;GO:0009532//plastid stroma;GO:0031090//organelle membrane;GO:0009534//chloroplast thylakoid	GO:0009975//cyclase activity	GO:0006970//response to osmotic stress;GO:0051707//response to other organism	gi|264913441|gb|ACY74379.1|/9.11452e-147/allene oxidase cyclase [Brassica napus]	AT3G25780.1 allene oxide cyclase 3
Bra004550	1140	9.83	42.04	2.0965	Up	0.841178	K09060|1|2e-140|496|aly:ARALYDRAFT_322281|plant G-box-binding factor	GO:0044444	GO:0003677//DNA binding	GO:0009725//response to hormone;GO:0006351//transcription, DNA-templated	gi|685303910|ref|XP_009142667.1|/0/PREDICTED: G-box-binding factor 3 isoform X1 [Brassica rapa]	AT2G46270.1 G-box binding factor 3
Bra012441	462	11.235	47.915	2.09248	Up	0.845215	K11982|1|1e-20|97.1|zma:100383341|E3 ubiquitin-protein ligase RNF115/126 [EC:6.3.2.19]	-	GO:0046914//transition metal ion binding	-	gi|685330253|ref|XP_009103111.1|/2.4806e-74/PREDICTED: E3 ubiquitin-protein ligase RING1-like [Brassica rapa]	AT1G26800.1 RING/U-box superfamily protein
Bra034844	1446	8.535	36.365	2.09109	Up	0.835352	-	-	GO:0016740//transferase activity	-	gi|685312333|ref|XP_009146730.1|/0/PREDICTED: uncharacterized protein LOC103870351 [Brassica rapa]	AT3G11420.1 Protein of unknown function (DUF604)
Bra036312	1194	14.05	59.685	2.0868	Up	0.85109	K05389|1|3e-163|572|aly:ARALYDRAFT_490395|potassium channel subfamily K, other eukaryote	GO:0000325//plant-type vacuole;GO:0016020//membrane	GO:0005249//voltage-gated potassium channel activity	GO:0030001//metal ion transport	gi|685351897|ref|XP_009111339.1|/0/PREDICTED: two-pore potassium channel 5 [Brassica rapa]	AT4G01840.1 Ca2+ activated outward rectifying K+ channel 5
Bra035800	2820	8.55	36.19	2.08159	Up	0.834745	K14844|1|5e-13|75.1|pop:POPTR_1112991|pumilio homology domain family member 6	GO:0043231//intracellular membrane-bounded organelle	GO:0003723//RNA binding	-	gi|685310103|ref|XP_009145655.1|/0/PREDICTED: pumilio homolog 5 isoform X1 [Brassica rapa]	AT3G20250.1 pumilio 5
Bra003736	1089	26.645	112.505	2.07805	Up	0.861018	K00514|1|1e-19|95.9|rcu:RCOM_1428040|zeta-carotene desaturase [EC:1.3.5.6];K01206|2|1e-12|72.0|ath:AT1G67830|alpha-L-fucosidase [EC:3.2.1.51]	-	GO:0016788//hydrolase activity, acting on ester bonds;GO:0016747//transferase activity, transferring acyl groups other than amino-acyl groups	GO:0000003//reproduction	gi|685334291|ref|XP_009104692.1|/0/PREDICTED: GDSL esterase/lipase EXL3-like [Brassica rapa]	AT1G75900.1 GDSL-like Lipase/Acylhydrolase superfamily protein
Bra009620	519	8.505	35.875	2.0766	Up	0.8344	-	-	-	-	gi|674892450|emb|CDY40326.1|/1.33065e-58/BnaA10g27420D [Brassica napus]	AT5G02020.1 Encodes a protein involved in salt tolerance, names SIS (Salt Induced Serine rich).
Bra000884	285	61.135	257.82	2.07629	Up	0.868698	-	-	-	GO:0009414//response to water deprivation;GO:0007275//multicellular organismal development;GO:0006979//response to oxidative stress	gi|674942724|emb|CDX90942.1|/4.2501e-34/BnaA03g26220D [Brassica napus]	AT4G02380.1 senescence-associated gene 21
Bra014842	552	12.82	54.055	2.07603	Up	0.848169	-	-	-	-	gi|674957419|emb|CDX76172.1|/6.01471e-93/BnaA04g04360D [Brassica napus]	AT3G54040.1 PAR1 protein
Bra011087	1086	52.285	220.32	2.07513	Up	0.867615	K15172|1|4e-26|117|vcn:VOLCADRAFT_106802|transcription elongation factor SPT5	-	GO:0046914//transition metal ion binding;GO:0001071//nucleic acid binding transcription factor activity	GO:0006351//transcription, DNA-templated	gi|685258056|ref|XP_009128959.1|/0/PREDICTED: zinc finger CCCH domain-containing protein 49-like [Brassica rapa]	AT4G29190.1 Zinc finger C-x8-C-x5-C-x3-H type family protein
Bra013945	1278	58.055	244.155	2.07231	Up	0.867894	K14497|1|0.0|718|ath:AT4G26080|protein phosphatase 2C [EC:3.1.3.16]	GO:0043231//intracellular membrane-bounded organelle;GO:0043234//protein complex	GO:0019900//kinase binding;GO:0046872//metal ion binding;GO:0004721//phosphoprotein phosphatase activity	GO:0010118//stomatal movement;GO:0009767//photosynthetic electron transport chain;GO:0009738//abscisic acid-activated signaling pathway;GO:0006950//response to stress;GO:0006464//cellular protein modification process	gi|685260435|ref|XP_009139861.1|/0/PREDICTED: protein phosphatase 2C 56-like [Brassica rapa]	AT4G26080.1 Protein phosphatase 2C family protein
Bra010502	486	20.625	86.61	2.07014	Up	0.856768	K03686|1|5e-12|68.2|ppp:PHYPADRAFT_108109|molecular chaperone DnaJ;K09517|2|3e-11|65.5|pop:POPTR_572634|DnaJ homolog subfamily B member 11	GO:0043231//intracellular membrane-bounded organelle	GO:0005515//protein binding	GO:0044267//cellular protein metabolic process;GO:0050896//response to stimulus	gi|685346475|ref|XP_009109258.1|/1.49409e-79/PREDICTED: chaperone protein dnaJ 11, chloroplastic-like [Brassica rapa]	AT4G36040.1 Chaperone DnaJ-domain superfamily protein
Bra013740	231	24.7	103.4	2.06565	Up	0.859541	-	GO:0043231//intracellular membrane-bounded organelle	-	-	gi|685259862|ref|XP_009137489.1|/8.58863e-38/PREDICTED: uncharacterized protein LOC103861518 [Brassica rapa]	AT4G23885.1 unknown protein; BEST Arabidopsis thaliana protein match is: unknown protein (TAIR:AT5G24165.1); Has 30201 Blast hits to 17322 proteins in 780 species: Archae - 12; Bacteria - 1396; Metazoa - 17338; Fungi - 3422; Plants - 5037; Viruses - 0; Other Eukaryotes - 2996 (source: NCBI BLink).
Bra005090	1140	6.71	28.01	2.06156	Up	0.821583	K00967|1|0.0|677|ath:AT2G38670|ethanolamine-phosphate cytidylyltransferase [EC:2.7.7.14]	GO:0043231//intracellular membrane-bounded organelle	GO:0070567	GO:0046335//ethanolamine biosynthetic process	gi|685305284|ref|XP_009143367.1|/0/PREDICTED: ethanolamine-phosphate cytidylyltransferase [Brassica rapa]	AT2G38670.1 phosphorylethanolamine cytidylyltransferase 1
Bra011994	585	37.115	153.33	2.04657	Up	0.863414	-	-	-	-	gi|674928816|emb|CDY04516.1|/5.63535e-109/BnaA07g13420D [Brassica napus]	AT2G27830.1 unknown protein; BEST Arabidopsis thaliana protein match is: unknown protein (TAIR:AT4G22758.1); Has 131 Blast hits to 131 proteins in 17 species: Archae - 0; Bacteria - 0; Metazoa - 0; Fungi - 0; Plants - 131; Viruses - 0; Other Eukaryotes - 0 (source: NCBI BLink).
Bra022692	1344	32.135	132.43	2.04301	Up	0.861461	K00451|1|0.0|860|ath:AT5G54080|homogentisate 1,2-dioxygenase [EC:1.13.11.5]	-	GO:0016702//oxidoreductase activity, acting on single donors with incorporation of molecular oxygen, incorporation of two atoms of oxygen	GO:0006558//L-phenylalanine metabolic process;GO:0006570//tyrosine metabolic process	gi|674904242|emb|CDY28797.1|/0/BnaA02g09890D [Brassica napus]	AT5G54080.2 homogentisate 1,2-dioxygenase
Bra006850	2169	5.44	22.38	2.04053	Up	0.808947	K12309|1|0.0|1245|aly:ARALYDRAFT_485655|beta-galactosidase [EC:3.2.1.23];K01190|3|1e-65|249|cme:CMP078C|beta-galactosidase [EC:3.2.1.23]	GO:0005576//extracellular region;GO:0030312//external encapsulating structure	GO:0043167//ion binding;GO:0015925//galactosidase activity	GO:0044238	gi|685282506|ref|XP_009132166.1|/0/PREDICTED: beta-galactosidase 4 [Brassica rapa]	AT5G56870.1 beta-galactosidase 4
Bra025400	804	15.5	63.675	2.03846	Up	0.850318	-	-	GO:0005488//binding	-	gi|674947211|emb|CDX86364.1|/1.98723e-143/BnaA06g30810D [Brassica napus]	AT3G29575.4 ABI five binding protein 3
Bra024274	477	23.61	96.81	2.03576	Up	0.85749	-	-	-	-	gi|674888919|emb|CDY43797.1|/1.58368e-83/BnaA06g23330D [Brassica napus]	AT5G64180.1 unknown protein; Has 1807 Blast hits to 1807 proteins in 277 species: Archae - 0; Bacteria - 0; Metazoa - 736; Fungi - 347; Plants - 385; Viruses - 0; Other Eukaryotes - 339 (source: NCBI BLink).
Bra027233	207	9.15	37.435	2.03254	Up	0.833662	-	-	-	-	gi|674935835|emb|CDX97679.1|/1.28159e-31/BnaA05g24000D [Brassica napus]	AT3G15534.1 unknown protein; FUNCTIONS IN: molecular_function unknown; INVOLVED IN: biological_process unknown; LOCATED IN: cellular_component unknown; BEST Arabidopsis thaliana protein match is: unknown protein (TAIR:AT1G52855.1); Has 30201 Blast hits to 17322 proteins in 780 species: Archae - 12; Bacteria - 1396; Metazoa - 17338; Fungi - 3422; Plants - 5037; Viruses - 0; Other Eukaryotes - 2996…
Bra011469	630	21.025	86.01	2.0324	Up	0.855258	-	-	-	-	gi|685257070|ref|XP_009119341.1|/3.01292e-85/PREDICTED: uncharacterized protein LOC103844261 [Brassica rapa]	AT4G33780.1 FUNCTIONS IN: molecular_function unknown; INVOLVED IN: biological_process unknown; LOCATED IN: chloroplast; EXPRESSED IN: 24 plant structures; EXPRESSED DURING: 15 growth stages; BEST Arabidopsis thaliana protein match is: short hypocotyl in white light1 (TAIR:AT1G69935.1); Has 40 Blast hits to 40 proteins in 10 species: Archae - 0; Bacteria - 0; Metazoa - 0; Fungi - 0; Plants - 40; V…
Bra036327	1278	7.825	31.95	2.02965	Up	0.827064	-	GO:0044446;GO:0031090//organelle membrane;GO:0012505//endomembrane system;GO:0005634//nucleus	-	GO:0050794//regulation of cellular process;GO:0007275//multicellular organismal development	gi|685351937|ref|XP_009111357.1|/0/PREDICTED: NAC domain-containing protein 69-like [Brassica rapa]	AT4G01550.1 NAC domain containing protein 69
Bra018994	207	8.17	33.285	2.02646	Up	0.828706	-	-	-	-	gi|674878205|emb|CDY53802.1|/3.60543e-32/BnaA06g01810D [Brassica napus]	AT1G52855.1 unknown protein; BEST Arabidopsis thaliana protein match is: unknown protein (TAIR:AT3G15534.1); Has 35333 Blast hits to 34131 proteins in 2444 species: Archae - 798; Bacteria - 22429; Metazoa - 974; Fungi - 991; Plants - 531; Viruses - 0; Other Eukaryotes - 9610 (source: NCBI BLink).
Bra039785	1374	17.39	70.7	2.02345	Up	0.851697	-	-	-	-	gi|685297196|ref|XP_009139414.1|/0/PREDICTED: uncharacterized protein LOC103863415 isoform X1 [Brassica rapa]	AT3G53400.1 BEST Arabidopsis thaliana protein match is: conserved peptide upstream open reading frame 47 (TAIR:AT5G03190.1); Has 285 Blast hits to 285 proteins in 23 species: Archae - 0; Bacteria - 0; Metazoa - 1; Fungi - 0; Plants - 279; Viruses - 0; Other Eukaryotes - 5 (source: NCBI BLink).
Bra024758	846	5.315	21.565	2.02055	Up	0.80578	-	-	-	-	gi|685361807|ref|XP_009115304.1|/3.73567e-110/PREDICTED: uncharacterized protein LOC103840559 [Brassica rapa]	AT1G25370.1 Protein of unknown function (DUF1639)
Bra006928	630	9.82	39.72	2.01607	Up	0.835467	-	-	-	-	gi|685363364|ref|XP_009115948.1|/1.11978e-103/PREDICTED: uncharacterized protein LOC103841181 [Brassica rapa]	AT3G52480.1 unknown protein; FUNCTIONS IN: molecular_function unknown; INVOLVED IN: biological_process unknown; LOCATED IN: endomembrane system; EXPRESSED IN: 10 plant structures; EXPRESSED DURING: LP.04 four leaves visible, 4 anthesis, petal differentiation and expansion stage; Has 28 Blast hits to 28 proteins in 7 species: Archae - 0; Bacteria - 0; Metazoa - 0; Fungi - 0; Plants - 28; Viruses -…
Bra012309	477	20.265	81.965	2.01602	Up	0.854208	-	-	-	-	gi|685330653|ref|XP_009103259.1|/2.30198e-88/PREDICTED: uncharacterized protein LOC103829349 [Brassica rapa]	AT1G22160.1 Protein of unknown function (DUF581)
Bra003774	327	14.27	57.38	2.00756	Up	0.846921	-	GO:0044464	-	GO:0009607//response to biotic stimulus	gi|685334393|ref|XP_009104727.1|/5.84732e-58/PREDICTED: pathogenesis-related protein 5-like [Brassica rapa]	AT1G75030.1 thaumatin-like protein 3
Bra016176	735	12.7	50.95	2.00425	Up	0.843409	-	GO:0009536//plastid	-	-	gi|685337062|ref|XP_009105757.1|/4.24049e-142/PREDICTED: uncharacterized protein LOC103831623 [Brassica rapa]	AT1G70900.1 unknown protein; BEST Arabidopsis thaliana protein match is: unknown protein (TAIR:AT1G23110.4); Has 57 Blast hits to 57 proteins in 14 species: Archae - 0; Bacteria - 0; Metazoa - 0; Fungi - 0; Plants - 57; Viruses - 0; Other Eukaryotes - 0 (source: NCBI BLink).
Bra028523	1002	51.075	204.685	2.00272	Up	0.864005	-	-	-	-	gi|685268279|ref|XP_009125216.1|/1.6401e-157/PREDICTED: B2 protein [Brassica rapa]	AT5G42050.1 DCD (Development and Cell Death) domain protein
Bra032993	468	9.47	37.925	2.00171	Up	0.832972	-	GO:0042579//microbody	GO:0016289//CoA hydrolase activity	-	gi|685276958|ref|XP_009129432.1|/2.32582e-85/PREDICTED: uncharacterized protein LOC103854251 [Brassica rapa]	AT1G48320.1 Thioesterase superfamily protein
Bra026357	849	17.55	70.2	2	Up	0.850926	-	-	-	-	gi|674944070|emb|CDX89256.1|/7.97621e-157/BnaA01g16370D [Brassica napus]	AT4G27350.1 Protein of unknown function (DUF1223)
Bra008024	681	8.88	35.465	1.99776	Up	0.830396	-	-	-	-	gi|685273760|ref|XP_009127921.1|/2.24052e-116/PREDICTED: kunitz-type serine protease inhibitor DrTI-like [Brassica rapa]	AT1G72290.1 Kunitz family trypsin and protease inhibitor protein
Bra019693	813	10.745	42.885	1.99681	Up	0.837666	-	GO:0009536//plastid	-	-	gi|685316131|ref|XP_009148680.1|/1.12304e-113/PREDICTED: uncharacterized protein LOC103872092 [Brassica rapa]	AT1G13990.1 unknown protein; FUNCTIONS IN: molecular_function unknown; INVOLVED IN: biological_process unknown; LOCATED IN: chloroplast; EXPRESSED IN: 23 plant structures; EXPRESSED DURING: 13 growth stages; CONTAINS InterPro DOMAIN/s: Protein of unknown function DUF3110 (InterPro:IPR021503); Has 25 Blast hits to 25 proteins in 8 species: Archae - 0; Bacteria - 0; Metazoa - 0; Fungi - 0; Plants -…
Bra024526	810	7.37	29.335	1.99289	Up	0.820828	K09422|1|2e-98|356|ath:AT1G22640|myb proto-oncogene protein, plant	-	GO:0005488//binding;GO:0001071//nucleic acid binding transcription factor activity	GO:0009725//response to hormone;GO:0006970//response to osmotic stress;GO:0009699//phenylpropanoid biosynthetic process;GO:0006351//transcription, DNA-templated	gi|674911744|emb|CDY21378.1|/8.55507e-136/BnaA09g30490D [Brassica napus]	AT1G22640.1 myb domain protein 3
Bra005469	324	76.895	305.28	1.98917	Up	0.865925	-	-	-	GO:0009746;GO:0034285	gi|674915995|emb|CDY17205.1|/6.39673e-47/BnaA05g09830D [Brassica napus]	AT2G33830.2 Dormancy/auxin associated family protein
Bra028322	432	6.535	25.935	1.98864	Up	0.814166	-	GO:0030529//ribonucleoprotein complex	-	GO:0010467//gene expression	gi|685263819|ref|XP_009106587.1|/2.91418e-77/PREDICTED: uncharacterized protein LOC103832346 [Brassica rapa]	AT3G23605.1 Ubiquitin-like superfamily protein
Bra010693	498	33.94	134.415	1.98564	Up	0.859476	K13195|1|1e-33|140|pop:POPTR_712972|cold-inducible RNA-binding protein;K13107|2|4e-14|75.1|smo:SELMODRAFT_6997|RNA-binding motif protein, X-linked 2;K13044|4|6e-14|74.7|zma:100382653|heterogeneous nuclear ribonucleoprotein A/B/D	GO:0030312//external encapsulating structure;GO:0031981//nuclear lumen;GO:0009536//plastid;GO:0042579//microbody;GO:0016020//membrane	GO:0003676//nucleic acid binding;GO:0004672//protein kinase activity;GO:0004871//signal transducer activity;GO:0016620//oxidoreductase activity, acting on the aldehyde or oxo group of donors, NAD or NADP as acceptor;GO:0042802//identical protein binding;GO:0032559	GO:0006952//defense response;GO:0010038//response to metal ion;GO:0009725//response to hormone;GO:0006970//response to osmotic stress;GO:0009699//phenylpropanoid biosynthetic process;GO:0006464//cellular protein modification process	gi|674943274|emb|CDX90323.1|/4.534e-44/BnaA08g16610D [Brassica napus]	AT4G39260.3 cold, circadian rhythm, and RNA binding 1
Bra038905	957	22.96	90.735	1.98254	Up	0.854076	K14457|1|3e-136|482|ath:AT3G51520|2-acylglycerol O-acyltransferase 2 [EC:2.3.1.22]	-	GO:0016747//transferase activity, transferring acyl groups other than amino-acyl groups	-	gi|674899643|emb|CDY33272.1|/2.16815e-167/BnaA01g19390D [Brassica napus]	AT3G51520.1 diacylglycerol acyltransferase family
Bra007494	1263	29.215	115.31	1.98074	Up	0.857276	K10457|1|5e-06|50.4|smo:SELMODRAFT_99292|kelch-like protein 20	-	-	-	gi|685365070|ref|XP_009116673.1|/0/PREDICTED: F-box/kelch-repeat protein SKIP20 [Brassica rapa]	AT3G59940.1 Galactose oxidase/kelch repeat superfamily protein
Bra006959	498	9.115	35.915	1.97827	Up	0.829772	-	-	GO:0003677//DNA binding	-	gi|685363461|ref|XP_009115990.1|/8.34609e-69/PREDICTED: uncharacterized protein LOC103841224 isoform X1 [Brassica rapa]	AT3G52920.1 Family of unknown function (DUF662)
Bra025819	816	100.87	396.33	1.97421	Up	0.866384	-	GO:0044464	-	GO:0006950//response to stress;GO:0042221//response to chemical;GO:0009266//response to temperature stimulus	gi|685318163|ref|XP_009149525.1|/4.0892e-83/PREDICTED: dehydrin ERD10-like [Brassica rapa]	AT1G20450.1 Dehydrin family protein
Bra021504	549	13.94	54.745	1.9735	Up	0.843869	-	GO:0043231//intracellular membrane-bounded organelle	GO:0005488//binding	GO:0006810//transport	gi|685265973|ref|XP_009117519.1|/3.22304e-87/PREDICTED: PRA1 family protein F3-like [Brassica rapa]	AT3G13710.1 prenylated RAB acceptor 1.F4
Bra011236	1326	274.305	1076.15	1.97203	Up	0.86878	K00924|1|5e-130|462|osa:4342410|[EC:2.7.1.-];K07198|3|4e-65|246|gmx:100806916|5'-AMP-activated protein kinase, catalytic alpha subunit [EC:2.7.11.11]	-	GO:0004674//protein serine/threonine kinase activity;GO:0032559	GO:0006464//cellular protein modification process;GO:0032501//multicellular organismal process;GO:0006972//hyperosmotic response;GO:0009926//auxin polar transport;GO:0023052//signaling	gi|685257698|ref|XP_009127378.1|/0/PREDICTED: CBL-interacting serine/threonine-protein kinase 6 [Brassica rapa]	AT4G30960.1 CBL-interacting protein kinase 6
Bra018346	1068	37.085	144.43	1.96146	Up	0.859	K01090|1|5e-74|276|sbi:SORBI_01g038410|protein phosphatase [EC:3.1.3.16];K14497|2|6e-36|149|bdi:100838998|protein phosphatase 2C [EC:3.1.3.16]	GO:0043234//protein complex	GO:0004721//phosphoprotein phosphatase activity;GO:0043169//cation binding	GO:0006464//cellular protein modification process	gi|685307231|ref|XP_009144337.1|/2.08166e-179/PREDICTED: probable protein phosphatase 2C 25 [Brassica rapa]	AT2G30020.1 Protein phosphatase 2C family protein
Bra040608	1314	6.88	26.7	1.95636	Up	0.814313	K14664|1|0.0|725|aly:ARALYDRAFT_477533|IAA-amino acid hydrolase [EC:3.5.1.-]	GO:0043231//intracellular membrane-bounded organelle	GO:0010178//IAA-amino acid conjugate hydrolase activity;GO:0070011//peptidase activity, acting on L-amino acid peptides	GO:0042445//hormone metabolic process	gi|685313443|ref|XP_009147310.1|/0/PREDICTED: IAA-amino acid hydrolase ILR1 [Brassica rapa]	AT3G02875.1 Peptidase M20/M25/M40 family protein
Bra008497	633	5.345	20.725	1.95511	Up	0.800167	K03239|1|2e-09|60.5|aly:ARALYDRAFT_682509|translation initiation factor eIF-2B subunit alpha	-	GO:0005488//binding	-	gi|685274936|ref|XP_009128452.1|/1.60611e-108/PREDICTED: protein LURP-one-related 5 [Brassica rapa]	AT1G80120.1 Protein of unknown function (DUF567)
Bra026795	648	9.055	35.015	1.95119	Up	0.827212	-	GO:0016020//membrane;GO:0043231//intracellular membrane-bounded organelle	-	GO:0006950//response to stress	gi|685367807|ref|XP_009117864.1|/3.06607e-65/PREDICTED: protein PLANT CADMIUM RESISTANCE 2-like [Brassica rapa]	AT1G14870.1 PLANT CADMIUM RESISTANCE 2
Bra021698	228	16.14	62.095	1.94384	Up	0.845609	-	-	-	-	-	-
Bra010706	1350	9.285	35.705	1.94315	Up	0.827721	K01376|1|1e-74|278|osa:4335455|[EC:3.4.22.-]	GO:0043231//intracellular membrane-bounded organelle	GO:0004175//endopeptidase activity	GO:0009414//response to water deprivation;GO:0019538//protein metabolic process;GO:0006952//defense response;GO:0006970//response to osmotic stress	gi|674943261|emb|CDX90310.1|/1.24279e-101/BnaA08g16740D [Brassica napus]	AT4G39090.1 Papain family cysteine protease
Bra022794	1284	10.84	41.6	1.94022	Up	0.833678	K00924|1|9e-96|348|ath:AT1G30270|[EC:2.7.1.-];K07198|3|1e-61|235|smo:SELMODRAFT_450118|5'-AMP-activated protein kinase, catalytic alpha subunit [EC:2.7.11.11]	-	GO:0005515//protein binding;GO:0004672//protein kinase activity;GO:0000166//nucleotide binding	GO:0006464//cellular protein modification process;GO:0009628//response to abiotic stimulus	gi|685283642|ref|XP_009132727.1|/0/PREDICTED: CBL-interacting serine/threonine-protein kinase 11-like [Brassica rapa]	AT2G30360.1 CBL-interacting protein kinase 11
Bra026874	1959	8.495	32.6	1.94019	Up	0.823684	-	GO:0009536//plastid	GO:0004721//phosphoprotein phosphatase activity;GO:0043169//cation binding	-	gi|685368000|ref|XP_009117956.1|/0/PREDICTED: probable inactive purple acid phosphatase 2 [Brassica rapa]	AT1G13900.1 Purple acid phosphatases superfamily protein
Bra029278	969	66.105	253.175	1.9373	Up	0.863004	K14493|1|9e-43|172|ppp:PHYPADRAFT_118478|gibberellin receptor GID1 [EC:3.-.-.-]	-	GO:0016788//hydrolase activity, acting on ester bonds	-	gi|685278524|ref|XP_009130199.1|/0/PREDICTED: probable carboxylesterase 120 [Brassica rapa]	AT5G62180.1 carboxyesterase 20
Bra002970	393	51.89	198.465	1.93536	Up	0.861166	K11251|1|1e-45|178|aly:ARALYDRAFT_918601|histone H2A	GO:0043232;GO:0031981//nuclear lumen	GO:0003676//nucleic acid binding	GO:0006950//response to stress;GO:0051707//response to other organism;GO:0009292//genetic transfer	gi|674878415|emb|CDY53609.1|/4.51568e-46/BnaA01g25520D [Brassica napus]	AT5G54640.1 Histone superfamily protein
Bra020646	3678	5.575	21.315	1.93483	Up	0.800594	K05349|1|0.0|989|rcu:RCOM_1347430|beta-glucosidase [EC:3.2.1.21]	GO:0005576//extracellular region;GO:0005618//cell wall	GO:0004553//hydrolase activity, hydrolyzing O-glycosyl compounds	GO:0044238;GO:0003006//developmental process involved in reproduction	gi|685277662|ref|XP_009129779.1|/0/PREDICTED: beta-D-xylosidase 1-like [Brassica rapa]	AT5G49360.1 beta-xylosidase 1
Bra001972	495	19.55	74.695	1.93384	Up	0.848809	K13195|1|3e-31|132|pop:POPTR_712972|cold-inducible RNA-binding protein;K02965|2|4e-16|82.0|ath:AT5G47320|small subunit ribosomal protein S19;K11294|3|2e-14|76.3|zma:100273020|nucleolin	-	GO:0005488//binding	-	gi|674962270|emb|CDX71276.1|/3.56867e-44/BnaC07g05550D [Brassica napus]	AT4G39260.2 cold, circadian rhythm, and RNA binding 1
Bra006441	789	17.53	66.84	1.93089	Up	0.846675	-	-	-	-	gi|685281462|ref|XP_009131637.1|/1.46174e-155/PREDICTED: uncharacterized protein LOC103856287 [Brassica rapa]	AT5G18130.1 unknown protein; BEST Arabidopsis thaliana protein match is: unknown protein (TAIR:AT3G03870.2); Has 1807 Blast hits to 1807 proteins in 277 species: Archae - 0; Bacteria - 0; Metazoa - 736; Fungi - 347; Plants - 385; Viruses - 0; Other Eukaryotes - 339 (source: NCBI BLink).
Bra005022	291	5.72	21.715	1.9246	Up	0.800972	-	-	-	GO:0048513//organ development	gi|685305145|ref|XP_009143294.1|/6.66853e-42/PREDICTED: uncharacterized protein LOC103867019 [Brassica rapa]	AT2G39705.1 ROTUNDIFOLIA like 8
Bra001752	804	13.48	50.91	1.91713	Up	0.839356	-	GO:0043231//intracellular membrane-bounded organelle	GO:0003676//nucleic acid binding	GO:0009725//response to hormone;GO:0006972//hyperosmotic response;GO:0003006//developmental process involved in reproduction;GO:0009743//response to carbohydrate	gi|685289394|ref|XP_009135641.1|/1.37669e-114/PREDICTED: zinc finger protein AZF2-like [Brassica rapa]	AT3G19580.2 zinc-finger protein 2
Bra009854	1164	943.71	3563.42	1.91685	Up	0.86755	-	GO:0044464	-	GO:0009725//response to hormone;GO:0006970//response to osmotic stress	gi|685322524|ref|XP_009151093.1|/0/PREDICTED: dehydration-responsive protein RD22 [Brassica rapa]	AT5G25610.1 BURP domain-containing protein
Bra000507	465	10.525	39.59	1.91132	Up	0.830199	K02639|1|5e-75|277|aly:ARALYDRAFT_901657|ferredoxin	GO:0009536//plastid	GO:0051536//iron-sulfur cluster binding;GO:0043169//cation binding	GO:0006091//generation of precursor metabolites and energy	gi|674950082|emb|CDX83271.1|/3.60868e-87/BnaA03g22350D [Brassica napus]	AT2G27510.1 ferredoxin 3
Bra016405	1506	8.54	32.015	1.90644	Up	0.821157	K09580|1|0.0|853|ath:AT1G21750|protein disulfide-isomerase A1 [EC:5.3.4.1]	GO:0005618//cell wall;GO:0000323//lytic vacuole;GO:0000322;GO:0009536//plastid;GO:0031090//organelle membrane	GO:0005488//binding;GO:0015036//disulfide oxidoreductase activity	GO:0012501//programmed cell death;GO:0010038//response to metal ion;GO:0033554//cellular response to stress;GO:0019725//cellular homeostasis;GO:0018904;GO:0006970//response to osmotic stress;GO:0009791//post-embryonic development	gi|674893992|emb|CDY38821.1|/0/BnaC08g19950D [Brassica napus]	AT1G21750.1 PDI-like 1-1
Bra021274	1002	15.585	58.38	1.90532	Up	0.842687	K01078|1|3e-116|416|ath:AT1G14700|acid phosphatase [EC:3.1.3.2]	GO:0044464	GO:0016791//phosphatase activity	GO:0072502;GO:0006796//phosphate-containing compound metabolic process;GO:0000302//response to reactive oxygen species	gi|685265202|ref|XP_009113741.1|/0/PREDICTED: purple acid phosphatase 17-like [Brassica rapa]	AT3G17790.1 purple acid phosphatase 17
Bra016202	1449	59.16	221.49	1.90455	Up	0.860345	K14272|1|0.0|969|ath:AT1G70580|glutamate--glyoxylate aminotransferase [EC:2.6.1.4 2.6.1.2 2.6.1.44 2.6.1.-]	GO:0005618//cell wall;GO:0009532//plastid stroma;GO:0042579//microbody;GO:0005576//extracellular region	GO:0016755;GO:0047635;GO:0016846//carbon-sulfur lyase activity;GO:0048037//cofactor binding	GO:0006749//glutathione metabolic process;GO:0008652//cellular amino acid biosynthetic process;GO:0043094;GO:0006950//response to stress	gi|685336978|ref|XP_009105727.1|/0/PREDICTED: glutamate--glyoxylate aminotransferase 2 isoform X2 [Brassica rapa]	AT1G70580.4 alanine-2-oxoglutarate aminotransferase 2
Bra025936	1218	8.615	32.225	1.90326	Up	0.821091	-	-	-	-	gi|674906849|emb|CDY26198.1|/0/BnaA06g12190D [Brassica napus]	AT1G17940.1 Endosomal targeting BRO1-like domain-containing protein
Bra009279	1044	14.195	53.03	1.90143	Up	0.839701	-	-	-	-	gi|685379247|ref|XP_009122358.1|/8.15249e-151/PREDICTED: uncharacterized rhomboid protein AN10929-like [Brassica rapa]	AT5G07250.1 RHOMBOID-like protein 3
Bra015785	1284	10.265	38.315	1.90018	Up	0.828459	-	GO:0044464	-	GO:0051234//establishment of localization	gi|685338470|ref|XP_009106264.1|/0/PREDICTED: probable folate-biopterin transporter 7 isoform X1 [Brassica rapa]	AT1G64890.1 Major facilitator superfamily protein
Bra017215	1167	14.265	53.075	1.89555	Up	0.839684	-	-	GO:0046914//transition metal ion binding	-	gi|685301842|ref|XP_009141620.1|/1.75117e-129/PREDICTED: uncharacterized protein LOC103865568 [Brassica rapa]	AT2G36950.1 Heavy metal transport/detoxification superfamily protein
Bra011735	858	12.795	47.56	1.89417	Up	0.836107	-	-	-	GO:0006950//response to stress	gi|674853815|emb|CDY71121.1|/6.41299e-113/BnaAnng36200D [Brassica napus]	AT4G36990.1 heat shock factor 4
Bra029274	369	22.985	85.23	1.89067	Up	0.849317	-	GO:0031224//intrinsic component of membrane;GO:0031090//organelle membrane	-	-	gi|685278537|ref|XP_009130203.1|/3.85673e-47/PREDICTED: uncharacterized protein LOC103854994 [Brassica rapa]	AT5G62200.1 Embryo-specific protein 3, (ATS3)
Bra018695	483	231.255	855.815	1.88781	Up	0.865219	-	GO:0030312//external encapsulating structure	GO:0004857//enzyme inhibitor activity	-	gi|685314808|ref|XP_009148010.1|/1.14506e-79/PREDICTED: cell wall / vacuolar inhibitor of fructosidase 1 [Brassica rapa]	AT1G47960.1 cell wall / vacuolar inhibitor of fructosidase 1
Bra022142	1608	8.39	31.045	1.88762	Up	0.818843	K14445|1|0.0|970|aly:ARALYDRAFT_494217|solute carrier family 13 (sodium-dependent dicarboxylate transporter), member 2/3/5	GO:0043231//intracellular membrane-bounded organelle	GO:0015556//C4-dicarboxylate transmembrane transporter activity	GO:0015743//malate transport;GO:0030641//regulation of cellular pH;GO:0030001//metal ion transport	gi|685276044|ref|XP_009128981.1|/0/PREDICTED: tonoplast dicarboxylate transporter-like [Brassica rapa]	AT5G47560.1 tonoplast dicarboxylate transporter
Bra008710	603	13.365	49.44	1.88722	Up	0.837239	-	GO:0030529//ribonucleoprotein complex;GO:0009536//plastid	GO:0005198//structural molecule activity	GO:0010467//gene expression	gi|685377364|ref|XP_009121591.1|/7.79727e-103/PREDICTED: uncharacterized protein At5g19025 [Brassica rapa]	AT5G15260.1 Ribosomal protein L34e superfamily protein
Bra019645	492	40.39	148.995	1.88319	Up	0.856243	-	-	GO:0046872//metal ion binding	GO:0009743//response to carbohydrate	gi|685316256|ref|XP_009148741.1|/3.95115e-74/PREDICTED: zinc finger A20 and AN1 domain-containing stress-associated protein 6-like [Brassica rapa]	AT2G36320.1 A20/AN1-like zinc finger family protein
Bra025450	1029	104.195	384.25	1.88276	Up	0.862741	-	-	-	-	gi|685298752|ref|XP_009140145.1|/5.04313e-144/PREDICTED: B2 protein-like [Brassica rapa]	AT5G42050.1 DCD (Development and Cell Death) domain protein
Bra003435	708	15.42	56.8	1.88109	Up	0.840948	-	GO:0031231//intrinsic component of peroxisomal membrane;GO:0009536//plastid	GO:0005515//protein binding	GO:0007031//peroxisome organization	gi|674965607|emb|CDX67850.1|/2.94941e-127/BnaA07g18900D [Brassica napus]	AT3G61070.3 peroxin 11E
Bra027279	1953	6.82	25.06	1.87754	Up	0.807667	-	-	-	-	gi|685311444|ref|XP_009146287.1|/0/PREDICTED: uncharacterized protein LOC103869956 [Brassica rapa]	AT3G15095.1 unknown protein; FUNCTIONS IN: molecular_function unknown; INVOLVED IN: biological_process unknown; LOCATED IN: chloroplast; EXPRESSED IN: 22 plant structures; EXPRESSED DURING: 13 growth stages; Has 9762 Blast hits to 6439 proteins in 764 species: Archae - 77; Bacteria - 1339; Metazoa - 3211; Fungi - 718; Plants - 437; Viruses - 131; Other Eukaryotes - 3849 (source: NCBI BLink).
Bra019346	795	13.05	47.92	1.87658	Up	0.83591	-	GO:0009536//plastid	-	GO:0006787	gi|685292739|ref|XP_009137299.1|/6.60405e-156/PREDICTED: protein STAY-GREEN 1, chloroplastic [Brassica rapa]	AT4G22920.1 non-yellowing 1
Bra033349	501	25.295	92.82	1.87558	Up	0.850384	-	GO:0031090//organelle membrane;GO:0043231//intracellular membrane-bounded organelle	-	-	gi|674943530|emb|CDX89942.1|/4.13403e-93/BnaA10g01400D [Brassica napus]	AT1G02816.1 Protein of unknown function, DUF538
Bra029326	1287	60.085	220.22	1.87387	Up	0.859361	K14209|1|6e-173|605|aly:ARALYDRAFT_497022|solute carrier family 36 (proton-coupled amino acid transporter)	GO:0031224//intrinsic component of membrane	GO:0005275//amine transmembrane transporter activity	-	gi|685278423|ref|XP_009130155.1|/0/PREDICTED: proton-coupled amino acid transporter 3 [Brassica rapa]	AT5G65990.1 Transmembrane amino acid transporter family protein
Bra003789	1704	14.94	54.585	1.86932	Up	0.839405	K02552|1|0.0|938|aly:ARALYDRAFT_476608|menaquinone-specific isochorismate synthase [EC:5.4.4.2]	GO:0043231//intracellular membrane-bounded organelle	GO:0050486//intramolecular transferase activity, transferring hydroxy groups	GO:0009696//salicylic acid metabolic process;GO:0042371//vitamin K biosynthetic process;GO:0009814//defense response, incompatible interaction	gi|685334448|ref|XP_009104748.1|/0/PREDICTED: isochorismate synthase 1, chloroplastic [Brassica rapa]	AT1G74710.1 ADC synthase superfamily protein
Bra041021	165	40.47	147.65	1.86726	Up	0.85575	-	GO:0031224//intrinsic component of membrane	-	GO:0009725//response to hormone;GO:0006972//hyperosmotic response	gi|674928081|emb|CDY05209.1|/2.91658e-15/BnaC05g45940D [Brassica napus]	AT3G05880.1 Low temperature and salt responsive protein family
Bra011033	2262	6.45	23.525	1.86682	Up	0.803564	K08286|1|0.0|1195|aly:ARALYDRAFT_491919|protein-serine/threonine kinase [EC:2.7.11.-];K00924|5|0.0|827|aly:ARALYDRAFT_473063|[EC:2.7.1.-]	GO:0016020//membrane	GO:0004672//protein kinase activity;GO:0032559	GO:0006468//protein phosphorylation;GO:0007167//enzyme linked receptor protein signaling pathway	gi|685258200|ref|XP_009129583.1|/0/PREDICTED: receptor-like protein kinase 5 [Brassica rapa]	AT4G28490.1 Leucine-rich receptor-like protein kinase family protein
Bra033483	717	24.345	88.655	1.86458	Up	0.848743	K13238|1|7e-09|58.9|vcn:VOLCADRAFT_77525|3,2-trans-enoyl-CoA isomerase, mitochondrial [EC:5.3.3.8];K10527|2|2e-07|53.9|pop:POPTR_725677|enoyl-CoA hydratase/3-hydroxyacyl-CoA dehydrogenase [EC:4.2.1.17 1.1.1.35 1.1.1.211];K05607|3|2e-07|53.9|rcu:RCOM_0191380|methylglutaconyl-CoA hydratase [EC:4.2.1.18];K12663|4|4e-07|53.1|pop:POPTR_548063|delta(3,5)-Delta(2,4)-dienoyl-CoA isomerase [EC:5.3.3.-]	GO:0042579//microbody	GO:0005488//binding;GO:0016863//intramolecular oxidoreductase activity, transposing C=C bonds;GO:0016856	GO:0006631//fatty acid metabolic process;GO:0009850//auxin metabolic process;GO:0009628//response to abiotic stimulus;GO:0048588//developmental cell growth;GO:0009733//response to auxin	gi|685297408|ref|XP_009139510.1|/1.05032e-127/PREDICTED: glyoxysomal fatty acid beta-oxidation multifunctional protein MFP-a-like [Brassica rapa]	AT4G14440.1 3-hydroxyacyl-CoA dehydratase 1
Bra034402	978	84.21	305.585	1.85951	Up	0.861035	-	GO:0030312//external encapsulating structure;GO:0009532//plastid stroma;GO:0031090//organelle membrane;GO:0005576//extracellular region	GO:0046914//transition metal ion binding;GO:0005543//phospholipid binding;GO:0042802//identical protein binding;GO:0016209//antioxidant activity;GO:0032559	GO:0010038//response to metal ion;GO:0009725//response to hormone;GO:0006970//response to osmotic stress	gi|600971811|gb|AHN63213.1|/0/annexin 1 [Brassica rapa subsp. rapa]	AT1G35720.1 annexin 1
Bra022827	1098	15.665	56.68	1.85529	Up	0.839947	-	GO:0043231//intracellular membrane-bounded organelle	-	-	gi|674948821|emb|CDX84800.1|/0/BnaA03g14300D [Brassica napus]	AT2G31110.2 Plant protein of unknown function (DUF828)
Bra025027	1176	7.67	27.74	1.85467	Up	0.810785	K15191|1|7e-70|262|pop:POPTR_234558|La-related protein 7	-	GO:0003676//nucleic acid binding	-	gi|685326233|ref|XP_009101528.1|/7.16752e-172/PREDICTED: la-related protein 6A isoform X1 [Brassica rapa]	AT5G46250.1 RNA-binding protein
Bra014955	915	56.95	205.765	1.85323	Up	0.857572	K00365|1|3e-153|539|ath:AT2G26230|urate oxidase [EC:1.7.3.3]	GO:0042579//microbody	GO:0016663//oxidoreductase activity, acting on other nitrogenous compounds as donors, oxygen as acceptor	GO:0044403//symbiosis, encompassing mutualism through parasitism;GO:0009112	gi|685328987|ref|XP_009102612.1|/1.91046e-168/PREDICTED: uricase [Brassica rapa]	AT2G26230.1 uricase / urate oxidase / nodulin 35, putative
Bra001291	456	223.54	806.415	1.85099	Up	0.863332	-	-	-	GO:0006950//response to stress;GO:0045333//cellular respiration	gi|685288165|ref|XP_009135032.1|/1.51991e-62/PREDICTED: uncharacterized protein LOC103859273 [Brassica rapa]	AT3G10020.1 unknown protein; FUNCTIONS IN: molecular_function unknown; INVOLVED IN: response to oxidative stress, anaerobic respiration; LOCATED IN: cellular_component unknown; EXPRESSED IN: 23 plant structures; EXPRESSED DURING: 13 growth stages; Has 47 Blast hits to 47 proteins in 12 species: Archae - 0; Bacteria - 0; Metazoa - 1; Fungi - 0; Plants - 46; Viruses - 0; Other Eukaryotes - 0 (sourc…
Bra036896	645	8.205	29.585	1.85029	Up	0.814182	-	GO:0031224//intrinsic component of membrane	-	-	gi|674903254|emb|CDY29765.1|/2.3502e-109/BnaA01g19010D [Brassica napus]	AT4G14746.1 CONTAINS InterPro DOMAIN/s: EGF-like (InterPro:IPR006210); Has 259 Blast hits to 234 proteins in 55 species: Archae - 0; Bacteria - 0; Metazoa - 184; Fungi - 0; Plants - 69; Viruses - 0; Other Eukaryotes - 6 (source: NCBI BLink).
Bra023077	885	27.26	98.12	1.84776	Up	0.849793	-	-	-	-	gi|685284388|ref|XP_009133095.1|/1.58708e-173/PREDICTED: F-box protein PP2-A15-like [Brassica rapa]	AT3G53000.1 phloem protein 2-A15
Bra017819	1497	33.82	121.545	1.84554	Up	0.852435	K00517|1|0.0|858|ath:AT4G37370|[EC:1.14.-.-]	GO:0043231//intracellular membrane-bounded organelle;GO:0016020//membrane	GO:0016491//oxidoreductase activity;GO:0005506//iron ion binding	GO:0009628//response to abiotic stimulus;GO:0008152//metabolic process	gi|674903444|emb|CDY29549.1|/0/BnaA03g53940D [Brassica napus]	AT4G37370.1 cytochrome P450, family 81, subfamily D, polypeptide 8
Bra022247	1065	39.475	141.785	1.84469	Up	0.853486	K01915|1|0.0|635|aly:ARALYDRAFT_479266|glutamine synthetase [EC:6.3.1.2]	GO:0005840//ribosome;GO:0009536//plastid;GO:0016020//membrane	GO:0046914//transition metal ion binding;GO:0016211;GO:0032559	GO:0010038//response to metal ion;GO:0071941;GO:0006541//glutamine metabolic process;GO:0042126//nitrate metabolic process	gi|440808119|gb|AGC24234.1|/0/glutamine synthetase 1 [Brassica napus]	AT3G17820.1 glutamine synthetase 1.3
Bra026835	996	11.77	41.94	1.83321	Up	0.827688	K15275|1|2e-177|619|aly:ARALYDRAFT_888812|solute carrier family 35 (UDP-galactose transporter), member B1	GO:0031224//intrinsic component of membrane	-	GO:0006810//transport	gi|674899159|emb|CDY33752.1|/0/BnaA09g45580D [Brassica napus]	AT1G14360.1 UDP-galactose transporter 3
Bra017207	708	24.63	87.725	1.83257	Up	0.846265	-	-	-	-	gi|685301857|ref|XP_009141628.1|/1.62676e-136/PREDICTED: cell number regulator 8-like [Brassica rapa]	AT2G37110.1 PLAC8 family protein
Bra028980	300	87.56	311.775	1.83216	Up	0.858737	-	-	GO:0016787//hydrolase activity	GO:0010876//lipid localization	gi|674896079|emb|CDY36745.1|/4.64306e-50/BnaA03g11410D [Brassica napus]	AT5G55450.1 Bifunctional inhibitor/lipid-transfer protein/seed storage 2S albumin superfamily protein
Bra011907	459	13.805	49.025	1.82833	Up	0.833235	-	GO:0043231//intracellular membrane-bounded organelle	-	-	gi|685331960|ref|XP_009103744.1|/1.31298e-65/PREDICTED: uncharacterized protein LOC103829796 [Brassica rapa]	AT1G55265.1 Protein of unknown function, DUF538
Bra014417	687	39.485	140.095	1.82703	Up	0.852435	K09338|1|1e-90|330|ath:AT3G61890|homeobox-leucine zipper protein	GO:0043231//intracellular membrane-bounded organelle	GO:0001071//nucleic acid binding transcription factor activity;GO:0003677//DNA binding	GO:0006355//regulation of transcription, DNA-templated;GO:0006970//response to osmotic stress;GO:0009755//hormone-mediated signaling pathway	gi|685295766|ref|XP_009138744.1|/2.47413e-130/PREDICTED: homeobox-leucine zipper protein ATHB-12-like [Brassica rapa]	AT3G61890.1 homeobox 12
Bra039384	474	8.08	28.475	1.81727	Up	0.808914	K03686|1|3e-10|62.4|pop:POPTR_1082525|molecular chaperone DnaJ	-	GO:0005515//protein binding	GO:0044267//cellular protein metabolic process;GO:0050896//response to stimulus	gi|685385569|ref|XP_009124738.1|/4.336e-88/PREDICTED: chaperone protein dnaJ 11, chloroplastic-like [Brassica rapa]	AT3G13310.1 Chaperone DnaJ-domain superfamily protein
Bra003082	1086	8.095	28.485	1.8151	Up	0.808881	K00797|1|0.0|650|ath:AT5G53120|spermidine synthase [EC:2.5.1.16]	GO:0044424	GO:0005488//binding;GO:0016765//transferase activity, transferring alkyl or aryl (other than methyl) groups	GO:0006596//polyamine biosynthetic process	gi|685372574|ref|XP_009119852.1|/0/PREDICTED: spermine synthase-like [Brassica rapa]	AT5G53120.5 spermidine synthase 3
Bra027257	831	19.285	67.815	1.81413	Up	0.839241	K10082|1|7e-07|52.8|mtr:MTR_5g031140|lectin, mannose-binding 2	GO:0005618//cell wall;GO:0043231//intracellular membrane-bounded organelle;GO:0005576//extracellular region	GO:0030246//carbohydrate binding	GO:0050832//defense response to fungus;GO:0009743//response to carbohydrate	gi|685311401|ref|XP_009146263.1|/1.4994e-151/PREDICTED: lectin-like protein At3g16530 [Brassica rapa]	AT3G16530.1 Legume lectin family protein
Bra025754	1833	11.32	39.75	1.81208	Up	0.823093	-	GO:0016020//membrane	GO:0005548//phospholipid transporter activity	GO:0051234//establishment of localization	gi|685317939|ref|XP_009149448.1|/0/PREDICTED: phosphatidylinositol/phosphatidylcholine transfer protein SFH4 [Brassica rapa]	AT1G19650.1 Sec14p-like phosphatidylinositol transfer family protein
Bra010231	999	11.28	39.605	1.81192	Up	0.822962	K13425|1|1e-19|95.5|rcu:RCOM_1616660|WRKY transcription factor 22;K13424|4|8e-19|92.8|pop:POPTR_663578|WRKY transcription factor 33	GO:0043231//intracellular membrane-bounded organelle	GO:0003677//DNA binding;GO:0001071//nucleic acid binding transcription factor activity;GO:0005515//protein binding	GO:0006351//transcription, DNA-templated;GO:0006952//defense response;GO:0009743//response to carbohydrate	gi|687568410|ref|NP_001288984.1|/9.50971e-179/probable WRKY transcription factor 11 [Brassica rapa]	AT4G31550.1 WRKY DNA-binding protein 11
Bra018576	582	61.295	214.46	1.80687	Up	0.853847	K07953|1|8e-85|310|ath:AT1G56330|GTP-binding protein SAR1 [EC:3.6.5.-]	GO:0043231//intracellular membrane-bounded organelle;GO:0044444;GO:0016020//membrane	GO:0032561//guanyl ribonucleotide binding	GO:0048193//Golgi vesicle transport;GO:0015031//protein transport	gi|674938374|emb|CDX95000.1|/8.91926e-88/BnaC05g06710D [Brassica napus]	AT1G56330.1 secretion-associated RAS 1B
Bra000342	1206	14.81	51.785	1.80596	Up	0.832398	-	-	-	-	gi|685285502|ref|XP_009133659.1|/0/PREDICTED: F-box/kelch-repeat protein At2g44130-like [Brassica rapa]	AT2G44130.1 Galactose oxidase/kelch repeat superfamily protein
Bra003500	405	9.475	33.125	1.80572	Up	0.815446	K04371|1|3e-21|98.2|vvi:100254083|extracellular signal-regulated kinase 1/2 [EC:2.7.11.24];K09060|2|4e-08|54.7|zma:100192709|plant G-box-binding factor	GO:0043231//intracellular membrane-bounded organelle	GO:0003677//DNA binding;GO:0001071//nucleic acid binding transcription factor activity;GO:0046983//protein dimerization activity	GO:0006351//transcription, DNA-templated	gi|685333557|ref|XP_009104386.1|/1.62383e-73/PREDICTED: ocs element-binding factor 1-like [Brassica rapa]	AT3G62420.1 basic region/leucine zipper motif 53
Bra023436	1455	8.32	29.065	1.80463	Up	0.807897	K13535|1|6e-07|53.9|cre:CHLREDRAFT_121979|cardiolipin-specific phospholipase [EC:3.1.1.-]	-	-	GO:0006787	gi|685269880|ref|XP_009125946.1|/0/PREDICTED: pheophytinase, chloroplastic-like [Brassica rapa]	AT5G13800.1 pheophytinase
Bra023439	1197	7.345	25.58	1.80018	Up	0.801595	K12183|1|7e-156|548|aly:ARALYDRAFT_488210|ESCRT-I complex subunit TSG101	GO:0032991//macromolecular complex;GO:0010008//endosome membrane	GO:0032182//small conjugating protein binding	GO:0000904//cell morphogenesis involved in differentiation;GO:0006464//cellular protein modification process	gi|685269886|ref|XP_009125949.1|/0/PREDICTED: protein ELC-like [Brassica rapa]	AT5G13860.1 ELCH-like
Bra039409	606	27.725	96.02	1.79215	Up	0.844	-	GO:0043231//intracellular membrane-bounded organelle	-	GO:0006351//transcription, DNA-templated;GO:0043401//steroid hormone mediated signaling pathway	gi|685313244|ref|XP_009147204.1|/2.45305e-79/PREDICTED: transcription factor bHLH150-like [Brassica rapa]	AT3G05800.1 AtBS1(activation-tagged BRI1 suppressor 1)-interacting factor 1
Bra024694	645	7.52	26.03	1.79137	Up	0.801825	K03857|1|1e-22|104|ota:Ot03g04730|phosphatidylinositol glycan, class A [EC:2.4.1.198]	GO:0043231//intracellular membrane-bounded organelle;GO:0031224//intrinsic component of membrane	GO:0008565//protein transporter activity	GO:0015031//protein transport	gi|685362036|ref|XP_009115397.1|/1.02441e-124/PREDICTED: transmembrane emp24 domain-containing protein p24delta9 [Brassica rapa]	AT1G26690.1 emp24/gp25L/p24 family/GOLD family protein
Bra012478	972	12.72	43.915	1.78762	Up	0.825637	K03453|1|4e-13|73.6|vcn:VOLCADRAFT_102664|bile acid:Na+ symporter, BASS family	GO:0044464	-	-	gi|674874637|emb|CDY58595.1|/1.20909e-171/BnaA07g36910D [Brassica napus]	AT1G25420.1 Regulator of Vps4 activity in the MVB pathway protein
Bra008908	1623	7.995	27.445	1.77937	Up	0.803564	K01464|1|0.0|953|aly:ARALYDRAFT_488062|dihydropyrimidinase [EC:3.5.2.2]	GO:0044464	GO:0016812//hydrolase activity, acting on carbon-nitrogen (but not peptide) bonds, in cyclic amides	GO:0031669//cellular response to nutrient levels;GO:0006208//pyrimidine nucleobase catabolic process	gi|685378135|ref|XP_009121872.1|/0/PREDICTED: dihydropyrimidinase [Brassica rapa]	AT5G12200.1 pyrimidine 2
Bra006197	1314	17.005	58.27	1.77679	Up	0.83376	K00616|1|0.0|716|aly:ARALYDRAFT_488161|transaldolase [EC:2.2.1.2]	GO:0009532//plastid stroma	GO:0016744	GO:0010038//response to metal ion;GO:0006007//glucose catabolic process	gi|685280858|ref|XP_009131334.1|/0/PREDICTED: uncharacterized protein LOC103856014 [Brassica rapa]	AT5G13420.1 Aldolase-type TIM barrel family protein
Bra007552	513	22.655	77.36	1.77176	Up	0.839241	K14488|1|4e-70|261|ath:AT3G60690|SAUR family protein	-	-	-	gi|685365238|ref|XP_009116750.1|/8.58491e-80/PREDICTED: auxin-induced protein X10A [Brassica rapa]	AT3G60690.1 SAUR-like auxin-responsive protein family
Bra033977	816	20.32	69.06	1.76495	Up	0.83614	K03517|1|2e-53|207|vvi:100243361|quinolinate synthase [EC:2.5.1.72]	GO:0009536//plastid	-	GO:0031163;GO:0031325//positive regulation of cellular metabolic process	gi|685273062|ref|XP_009127579.1|/5.59949e-150/PREDICTED: sufE-like protein 2, chloroplastic [Brassica rapa]	AT1G67810.1 sulfur E2
Bra018365	438	11.99	40.7	1.7632	Up	0.820303	-	-	GO:0005543//phospholipid binding	-	gi|674853426|emb|CDY71195.1|/1.31847e-80/BnaAnng36460D [Brassica napus]	AT2G29700.1 pleckstrin homologue 1
Bra038479	189	14.565	49.37	1.76113	Up	0.827327	-	GO:0030312//external encapsulating structure;GO:0043231//intracellular membrane-bounded organelle	GO:0030234//enzyme regulator activity	-	gi|674900737|emb|CDY32259.1|/1.98679e-25/BnaA01g17250D [Brassica napus]	AT4G16500.1 Cystatin/monellin superfamily protein
Bra011452	306	10.51	35.565	1.7587	Up	0.814756	-	GO:0009536//plastid	GO:0003824//catalytic activity	GO:0010035//response to inorganic substance	gi|685257109|ref|XP_009121254.1|/6.31599e-32/PREDICTED: uncharacterized protein LOC103846052 [Brassica rapa]	AT4G33540.1 metallo-beta-lactamase family protein
Bra015564	1590	57.655	195.005	1.75799	Up	0.849793	K01114|1|0.0|996|ath:AT1G07230|phospholipase C [EC:3.1.4.3]	-	GO:0016787//hydrolase activity	-	gi|685370426|ref|XP_009118978.1|/0/PREDICTED: non-specific phospholipase C1 [Brassica rapa]	AT1G07230.1 non-specific phospholipase C1
Bra039311	588	78.855	266.485	1.75678	Up	0.852124	-	GO:0016020//membrane;GO:0043231//intracellular membrane-bounded organelle	GO:0005488//binding	-	gi|685303328|ref|XP_009142370.1|/6.32793e-74/PREDICTED: remorin [Brassica rapa]	AT2G45820.1 Remorin family protein
Bra040144	2928	12.445	42.055	1.75671	Up	0.821436	K09667|1|0.0|1903|ath:AT3G04240|polypeptide N-acetylglucosaminyltransferase [EC:2.4.1.-]	-	GO:0016740//transferase activity	GO:0006486//protein glycosylation	gi|685267811|ref|XP_009125003.1|/0/PREDICTED: probable UDP-N-acetylglucosamine--peptide N-acetylglucosaminyltransferase SEC [Brassica rapa]	AT3G04240.1 Tetratricopeptide repeat (TPR)-like superfamily protein
Bra041026	1071	10.59	35.73	1.75443	Up	0.814034	K13648|1|2e-22|104|vvi:100258818|alpha-1,4-galacturonosyltransferase [EC:2.4.1.43]	-	GO:0016740//transferase activity	-	gi|685363166|ref|XP_009115870.1|/0/PREDICTED: probable galacturonosyltransferase-like 7 [Brassica rapa]	AT3G62660.1 galacturonosyltransferase-like 7
Bra025995	648	11.795	39.51	1.74404	Up	0.816709	K00799|1|3e-76|282|gmx:547936|glutathione S-transferase [EC:2.5.1.18]	GO:0044424	GO:0042277//peptide binding	GO:0009404//toxin metabolic process	gi|685317169|ref|XP_009149162.1|/1.02761e-123/PREDICTED: glutathione S-transferase U24 [Brassica rapa]	AT1G17170.1 glutathione S-transferase TAU 24
Bra006315	1092	8.7	29.135	1.74367	Up	0.802268	K13379|1|0.0|712|ath:AT5G15650|reversibly glycosylated polypeptide / UDP-arabinopyranose mutase [EC:2.4.1.- 5.4.99.30]	GO:0005840//ribosome;GO:0030312//external encapsulating structure;GO:0044459;GO:0031985//Golgi cisterna;GO:0031090//organelle membrane	GO:0035251//UDP-glucosyltransferase activity;GO:0016759//cellulose synthase activity	GO:0010038//response to metal ion;GO:0045229//external encapsulating structure organization;GO:0009250//glucan biosynthetic process;GO:0006970//response to osmotic stress;GO:0042546//cell wall biogenesis	gi|685281171|ref|XP_009131489.1|/0/PREDICTED: UDP-arabinopyranose mutase 2-like [Brassica rapa]	AT5G15650.1 reversibly glycosylated polypeptide 2
Bra037607	1611	66.35	222.1	1.74304	Up	0.8483	K13071|1|0.0|945|aly:ARALYDRAFT_905628|pheophorbide a oxygenase [EC:1.14.12.20]	GO:0009536//plastid	GO:0043169//cation binding;GO:0051536//iron-sulfur cluster binding;GO:0016730//oxidoreductase activity, acting on iron-sulfur proteins as donors;GO:0016703	GO:0042742//defense response to bacterium;GO:0006787;GO:0009791//post-embryonic development;GO:0048608//reproductive structure development	gi|685262257|ref|XP_009149744.1|/0/PREDICTED: pheophorbide a oxygenase, chloroplastic [Brassica rapa]	AT3G44880.1 Pheophorbide a oxygenase family protein with Rieske [2Fe-2S] domain
Bra016962	1095	16.925	56.62	1.74216	Up	0.828722	K13415|1|7e-60|229|vvi:100252647|protein brassinosteroid insensitive 1 [EC:2.7.10.1 2.7.11.1]	GO:0044464	GO:0004672//protein kinase activity;GO:0032559	GO:0006464//cellular protein modification process	gi|685302494|ref|XP_009141950.1|/0/PREDICTED: putative serine/threonine-protein kinase [Brassica rapa]	AT5G42440.1 Protein kinase superfamily protein
Bra018543	642	101.73	340.305	1.74208	Up	0.850893	K00799|1|2e-109|392|ath:AT2G02930|glutathione S-transferase [EC:2.5.1.18]	GO:0016020//membrane;GO:0044424	GO:0003824//catalytic activity	GO:0009404//toxin metabolic process	gi|31790095|gb|AAP58392.1|/1.04819e-121/glutathione S-transferase 2 [Brassica juncea]	AT2G02930.1 glutathione S-transferase F3
Bra009393	1425	66.075	220.985	1.74177	Up	0.848201	-	GO:0009526//plastid envelope	-	-	gi|685379643|ref|XP_009122527.1|/0/PREDICTED: R3H domain-containing protein 2 [Brassica rapa]	AT5G09620.1 Octicosapeptide/Phox/Bem1p family protein
Bra007898	1581	48.865	163.325	1.74087	Up	0.845576	-	-	-	-	gi|685273475|ref|XP_009127775.1|/0/PREDICTED: uncharacterized protein LOC103852633 [Brassica rapa]	AT1G70160.1 unknown protein; FUNCTIONS IN: molecular_function unknown; INVOLVED IN: biological_process unknown; LOCATED IN: endomembrane system; EXPRESSED IN: 24 plant structures; EXPRESSED DURING: 15 growth stages; BEST Arabidopsis thaliana protein match is: unknown protein (TAIR:AT4G27020.1); Has 108 Blast hits to 108 proteins in 20 species: Archae - 0; Bacteria - 0; Metazoa - 0; Fungi - 0; Pla…
Bra034002	711	109.75	366.06	1.73786	Up	0.851172	-	GO:0043231//intracellular membrane-bounded organelle	GO:0008135//translation factor activity, nucleic acid binding	GO:0006412//translation	gi|685272996|ref|XP_009127549.1|/4.60536e-118/PREDICTED: REF/SRPP-like protein At1g67360 [Brassica rapa]	AT1G67360.1 Rubber elongation factor protein (REF)
Bra016755	384	48.18	159.32	1.72542	Up	0.844148	-	-	-	-	-	-
Bra011398	1464	72.255	238.63	1.72361	Up	0.846889	K01369|1|0.0|817|aly:ARALYDRAFT_491400|legumain [EC:3.4.22.34]	GO:0005773//vacuole	GO:0004175//endopeptidase activity	GO:0016485//protein processing	gi|685257264|ref|XP_009125229.1|/0/PREDICTED: vacuolar-processing enzyme gamma-isozyme [Brassica rapa]	AT4G32940.1 gamma vacuolar processing enzyme
Bra028570	1002	11.065	36.405	1.71813	Up	0.811015	K01090|1|1e-45|181|sbi:SORBI_01g038410|protein phosphatase [EC:3.1.3.16];K14497|2|1e-42|171|rcu:RCOM_1579770|protein phosphatase 2C [EC:3.1.3.16]	GO:0043234//protein complex	GO:0004721//phosphoprotein phosphatase activity;GO:0043169//cation binding	GO:0006464//cellular protein modification process	gi|685268403|ref|XP_009125281.1|/0/PREDICTED: probable protein phosphatase 2C 69 [Brassica rapa]	AT5G10740.1 Protein phosphatase 2C family protein
Bra025033	1434	13.93	45.82	1.71778	Up	0.820024	K00819|1|0.0|877|aly:ARALYDRAFT_494356|ornithine--oxo-acid transaminase [EC:2.6.1.13]	GO:0043231//intracellular membrane-bounded organelle	GO:0008483//transaminase activity;GO:0046914//transition metal ion binding;GO:0048037//cofactor binding	GO:0006527//arginine catabolic process;GO:0006591//ornithine metabolic process;GO:0006972//hyperosmotic response;GO:0006560//proline metabolic process	gi|687567539|ref|NP_001288848.1|/0/ornithine aminotransferase, mitochondrial [Brassica rapa]	AT5G46180.1 ornithine-delta-aminotransferase
Bra016382	1443	15.195	49.975	1.71761	Up	0.822995	K13030|1|3e-107|387|sbi:SORBI_01g001220|cyanohydrin beta-glucosyltransferase [EC:2.4.1.85];K13228|2|2e-68|258|zma:100274317|UDP-glucosyltransferase BX9 [EC:2.4.1.202];K13691|3|3e-66|251|vvi:100242294|pathogen-inducible salicylic acid glucosyltransferase [EC:2.4.1.-];K13068|4|5e-66|249|ath:AT3G21560|sinapate 1-glucosyltransferase [EC:2.4.1.120];K13493|5|2e-65|248|ath:AT5G05870|cytokinin-N-glucosyl…	-	GO:0008194//UDP-glycosyltransferase activity	-	gi|685348905|ref|XP_009110142.1|/0/PREDICTED: UDP-glycosyltransferase 85A5-like [Brassica rapa]	AT1G22360.1 UDP-glucosyl transferase 85A2
Bra033856	954	17.26	56.755	1.71732	Up	0.82672	K00224|1|6e-143|504|aly:ARALYDRAFT_658933|[EC:1.3.1.-];K13081|5|3e-49|193|pop:POPTR_835080|leucoanthocyanidin reductase [EC:1.17.1.3]	-	GO:0016628//oxidoreductase activity, acting on the CH-CH group of donors, NAD or NADP as acceptor	GO:0009699//phenylpropanoid biosynthetic process	gi|674897359|emb|CDY35543.1|/2.6499e-176/BnaA05g16430D [Brassica napus]	AT1G32100.1 pinoresinol reductase 1
Bra007089	669	16.515	54.295	1.71704	Up	0.825538	-	-	-	-	gi|674959775|emb|CDX73459.1|/2.37148e-87/BnaC08g25440D [Brassica napus]	AT3G54680.1 proteophosphoglycan-related
Bra006415	990	20.495	67.275	1.7148	Up	0.830265	K05283|1|3e-35|147|aly:ARALYDRAFT_354960|phosphatidylinositol glycan, class W [EC:2.3.-.-];K15692|2|1e-09|62.0|smo:SELMODRAFT_66937|E3 ubiquitin-protein ligase RNF13 [EC:6.3.2.19]	-	GO:0046914//transition metal ion binding	GO:0009628//response to abiotic stimulus	gi|685281391|ref|XP_009131602.1|/0/PREDICTED: RING-H2 finger protein ATL52 [Brassica rapa]	AT5G17600.1 RING/U-box superfamily protein
Bra040621	285	41.95	137.525	1.71295	Up	0.841358	-	-	-	-	gi|674886092|emb|CDY46485.1|/1.98503e-41/BnaA02g36690D [Brassica napus]	AT5G43150.1 unknown protein; FUNCTIONS IN: molecular_function unknown; INVOLVED IN: biological_process unknown; LOCATED IN: mitochondrion; EXPRESSED IN: 22 plant structures; EXPRESSED DURING: 13 growth stages; Has 1807 Blast hits to 1807 proteins in 277 species: Archae - 0; Bacteria - 0; Metazoa - 736; Fungi - 347; Plants - 385; Viruses - 0; Other Eukaryotes - 339 (source: NCBI BLink).
Bra020903	396	22.95	74.95	1.70743	Up	0.832595	-	-	-	-	gi|685344470|ref|XP_009108489.1|/1.60853e-26/PREDICTED: ATP-dependent RNA helicase A-like [Brassica rapa]	AT4G21620.1 glycine-rich protein
Bra020325	1029	9.77	31.85	1.70486	Up	0.803548	K01710|1|2e-124|443|cme:CME136C|dTDP-glucose 4,6-dehydratase [EC:4.2.1.46];K12449|2|3e-27|120|ath:AT1G08200|UDP-apiose/xylose synthase	GO:0044444	GO:0016831//carboxy-lyase activity;GO:0048037//cofactor binding	GO:0006139//nucleobase-containing compound metabolic process;GO:0019321//pentose metabolic process	gi|674900212|emb|CDY32652.1|/0/BnaA02g07140D [Brassica napus]	AT5G59290.2 UDP-glucuronic acid decarboxylase 3
Bra034207	942	37.26	121.285	1.7027	Up	0.839241	-	-	-	-	gi|685266840|ref|XP_009121870.1|/7.89397e-164/PREDICTED: uncharacterized protein LOC103846655 [Brassica rapa]	AT4G03420.1 Protein of unknown function (DUF789)
Bra011946	2538	15.075	49.01	1.70092	Up	0.820927	K12309|1|0.0|826|ath:AT3G52840|beta-galactosidase [EC:3.2.1.23];K01190|3|9e-73|273|cme:CMP078C|beta-galactosidase [EC:3.2.1.23]	GO:0030312//external encapsulating structure	GO:0030246//carbohydrate binding;GO:0043167//ion binding;GO:0015925//galactosidase activity	GO:0044238	gi|685331787|ref|XP_009103690.1|/0/PREDICTED: beta-galactosidase 8 [Brassica rapa]	AT2G28470.1 beta-galactosidase 8
Bra001057	1191	9.885	32.135	1.70083	Up	0.803942	K03921|1|0.0|796|aly:ARALYDRAFT_477504|acyl-[acyl-carrier-protein] desaturase [EC:1.14.19.2]	GO:0009532//plastid stroma	GO:0046872//metal ion binding;GO:0016717//oxidoreductase activity, acting on paired donors, with oxidation of a pair of donors resulting in the reduction of molecular oxygen to two molecules of water	GO:0006631//fatty acid metabolic process	gi|674959537|emb|CDX74242.1|/0/BnaA03g28050D [Brassica napus]	AT3G02630.1 Plant stearoyl-acyl-carrier-protein desaturase family protein
Bra033837	858	99.24	322.105	1.69854	Up	0.847529	-	GO:0031224//intrinsic component of membrane	-	GO:0032502//developmental process	gi|674884349|emb|CDY48148.1|/7.15764e-137/BnaCnng15900D [Brassica napus]	AT3G45600.1 tetraspanin3
Bra006952	1920	17.735	57.56	1.69847	Up	0.825784	-	GO:0043234//protein complex;GO:0044431//Golgi apparatus part;GO:0016020//membrane	GO:0046872//metal ion binding;GO:0010209//vacuolar sorting signal binding	GO:0006892//post-Golgi vesicle-mediated transport;GO:0006605//protein targeting	gi|685363446|ref|XP_009115984.1|/0/PREDICTED: vacuolar-sorting receptor 1 [Brassica rapa]	AT3G52850.1 vacuolar sorting receptor homolog 1
Bra038611	1149	67.015	217.36	1.69753	Up	0.844854	-	GO:0044464	GO:0016791//phosphatase activity	-	gi|685320634|ref|XP_009150375.1|/0/PREDICTED: probable inactive purple acid phosphatase 29 [Brassica rapa]	AT5G63140.1 purple acid phosphatase 29
Bra005522	1389	125.635	407.315	1.69691	Up	0.848415	K07513|1|0.0|813|ath:AT2G33150|acetyl-CoA acyltransferase 1 [EC:2.3.1.16]	GO:0031981//nuclear lumen;GO:0009536//plastid;GO:0042579//microbody;GO:0031090//organelle membrane	GO:0016408//C-acyltransferase activity	GO:0009694//jasmonic acid metabolic process;GO:0009062//fatty acid catabolic process;GO:0009657//plastid organization;GO:0009738//abscisic acid-activated signaling pathway;GO:0006950//response to stress	gi|674915930|emb|CDY17140.1|/0/BnaA05g10480D [Brassica napus]	AT2G33150.1 peroxisomal 3-ketoacyl-CoA thiolase 3
Bra009543	531	13.705	44.415	1.69634	Up	0.817497	-	-	GO:0005488//binding	-	gi|685380089|ref|XP_009122724.1|/3.12399e-80/PREDICTED: uncharacterized protein LOC103847398 [Brassica rapa]	AT5G03230.1 Protein of unknown function, DUF584
Bra037944	1590	15.7	50.855	1.69563	Up	0.822158	K14611|1|0.0|838|pop:POPTR_570060|solute carrier family 23 (nucleobase transporter), member 1/2	GO:0030312//external encapsulating structure;GO:0043231//intracellular membrane-bounded organelle	GO:0005215//transporter activity	GO:0006810//transport	gi|685370208|ref|XP_009118902.1|/0/PREDICTED: nucleobase-ascorbate transporter 5 [Brassica rapa]	AT5G49990.1 Xanthine/uracil permease family protein
Bra008849	1014	9.63	31.19	1.69548	Up	0.802219	-	-	GO:0003676//nucleic acid binding;GO:0001071//nucleic acid binding transcription factor activity	GO:0010087//phloem or xylem histogenesis;GO:0032501//multicellular organismal process	gi|685377928|ref|XP_009121790.1|/1.15158e-119/PREDICTED: NAC transcription factor 29 [Brassica rapa]	AT5G13180.1 NAC domain containing protein 83
Bra013717	831	74.75	241.525	1.69203	Up	0.845001	K00861|1|1e-16|85.1|vcn:VOLCADRAFT_103251|riboflavin kinase [EC:2.7.1.26];K07748|2|1e-10|64.7|rcu:RCOM_0707880|sterol-4alpha-carboxylate 3-dehydrogenase (decarboxylating) [EC:1.1.1.170]	GO:0031090//organelle membrane;GO:0043231//intracellular membrane-bounded organelle	-	-	gi|685259816|ref|XP_009137263.1|/1.63793e-134/PREDICTED: reticulon-like protein B1 [Brassica rapa]	AT4G23630.1 VIRB2-interacting protein 1
Bra012239	1479	10.53	34.01	1.69145	Up	0.805862	K03781|1|0.0|985|ath:AT1G20630|catalase [EC:1.11.1.6]	GO:0005840//ribosome;GO:0030312//external encapsulating structure;GO:0009526//plastid envelope;GO:0042579//microbody	GO:0004601//peroxidase activity;GO:0005506//iron ion binding	GO:0009314//response to radiation;GO:0010038//response to metal ion;GO:0009725//response to hormone;GO:0000302//response to reactive oxygen species;GO:0009267//cellular response to starvation;GO:0042743//hydrogen peroxide metabolic process	gi|685330850|ref|XP_009103333.1|/0/PREDICTED: catalase-1 [Brassica rapa]	AT1G20630.1 catalase 1
Bra032415	1083	115.17	371.945	1.69132	Up	0.847332	K00457|1|0.0|658|aly:ARALYDRAFT_887861|4-hydroxyphenylpyruvate dioxygenase [EC:1.13.11.27]	GO:0009536//plastid	GO:0016702//oxidoreductase activity, acting on single donors with incorporation of molecular oxygen, incorporation of two atoms of oxygen;GO:0005515//protein binding	GO:0042360//vitamin E metabolic process;GO:0006520//cellular amino acid metabolic process;GO:0016109	gi|685369344|ref|XP_009118533.1|/0/PREDICTED: 4-hydroxyphenylpyruvate dioxygenase [Brassica rapa]	AT1G06570.1 phytoene desaturation 1
Bra005168	2022	23.13	74.615	1.6897	Up	0.831167	K04733|1|6e-54|210|smo:SELMODRAFT_159261|interleukin-1 receptor-associated kinase 4 [EC:2.7.11.1];K13418|2|1e-53|209|ath:AT1G71830|somatic embryogenesis receptor kinase 1 [EC:2.7.10.1 2.7.11.1];K13416|4|3e-53|208|rcu:RCOM_1534760|brassinosteroid insensitive 1-associated receptor kinase 1 [EC:2.7.10.1 2.7.11.1]	GO:0016020//membrane	GO:0030246//carbohydrate binding;GO:0004672//protein kinase activity;GO:0032559	GO:0006464//cellular protein modification process;GO:0010033//response to organic substance;GO:0007167//enzyme linked receptor protein signaling pathway;GO:0048229//gametophyte development	gi|685305458|ref|XP_009143456.1|/0/PREDICTED: L-type lectin-domain containing receptor kinase IV.1 [Brassica rapa]	AT2G37710.1 receptor lectin kinase
Bra031857	1518	9.53	30.74	1.68957	Up	0.800627	-	-	-	-	gi|685279164|ref|XP_009130514.1|/0/PREDICTED: uncharacterized protein At1g04910-like isoform X2 [Brassica rapa]	AT5G65470.1 O-fucosyltransferase family protein
Bra009959	1035	20.525	66.07	1.68661	Up	0.828492	K14272|1|1e-85|314|ath:AT1G70580|glutamate--glyoxylate aminotransferase [EC:2.6.1.4 2.6.1.2 2.6.1.44 2.6.1.-]	GO:0009532//plastid stroma;GO:0042579//microbody	GO:0048037//cofactor binding;GO:0016846//carbon-sulfur lyase activity;GO:0047635	GO:0008652//cellular amino acid biosynthetic process;GO:0043094	gi|685322849|ref|XP_009151206.1|/1.88642e-86/PREDICTED: glutamate--glyoxylate aminotransferase 2-like [Brassica rapa]	AT1G70580.4 alanine-2-oxoglutarate aminotransferase 2
Bra014465	1098	18.775	60.435	1.68657	Up	0.826342	K01714|1|0.0|675|aly:ARALYDRAFT_486562|dihydrodipicolinate synthase [EC:4.2.1.52]	GO:0009536//plastid	GO:0016836//hydro-lyase activity	GO:0009089//lysine biosynthetic process via diaminopimelate	gi|685295894|ref|XP_009138806.1|/0/PREDICTED: 4-hydroxy-tetrahydrodipicolinate synthase 1, chloroplastic [Brassica rapa]	AT3G60880.2 dihydrodipicolinate synthase 1
Bra019613	1635	9.505	30.575	1.68559	Up	0.800414	K08054|1|0.0|854|aly:ARALYDRAFT_496347|calnexin	GO:0005618//cell wall;GO:0031090//organelle membrane;GO:0031224//intrinsic component of membrane;GO:0009536//plastid	GO:0046872//metal ion binding;GO:0005515//protein binding	GO:0051234//establishment of localization;GO:0044267//cellular protein metabolic process	gi|674933069|emb|CDY00229.1|/0/BnaA06g21300D [Brassica napus]	AT5G61790.1 calnexin 1
Bra000412	852	10.36	33.32	1.68536	Up	0.804795	K09561|1|4e-06|50.1|vcn:VOLCADRAFT_67840|STIP1 homology and U-box containing protein 1 [EC:6.3.2.19]	-	-	-	gi|674950191|emb|CDX83380.1|/3.65274e-168/BnaA03g21260D [Brassica napus]	AT1G01680.1 plant U-box 54
Bra038058	678	9.575	30.785	1.68488	Up	0.8002	K01557|1|1e-121|433|aly:ARALYDRAFT_493291|acylpyruvate hydrolase [EC:3.7.1.5]	GO:0043231//intracellular membrane-bounded organelle	GO:0046914//transition metal ion binding;GO:0003824//catalytic activity	-	gi|674908133|emb|CDY24918.1|/6.11551e-129/BnaC03g22540D [Brassica napus]	AT4G15940.1 Fumarylacetoacetate (FAA) hydrolase family
Bra025365	507	14.18	45.57	1.68423	Up	0.817251	-	GO:0016020//membrane;GO:0009536//plastid	-	GO:0051707//response to other organism	gi|674947248|emb|CDX86401.1|/8.98172e-96/BnaA06g31180D [Brassica napus]	AT3G28930.1 AIG2-like (avirulence induced gene) family protein
Bra005738	537	13.085	42.02	1.68316	Up	0.814182	-	-	GO:0005488//binding	-	gi|685279601|ref|XP_009130722.1|/2.59769e-75/PREDICTED: uncharacterized protein LOC103855485 [Brassica rapa]	AT5G03230.1 Protein of unknown function, DUF584
Bra015703	654	14.29	45.7	1.67719	Up	0.817267	-	-	-	GO:0003006//developmental process involved in reproduction	gi|685338724|ref|XP_009106362.1|/7.32539e-101/PREDICTED: uncharacterized protein LOC103832154 [Brassica rapa]	AT1G76980.1 BEST Arabidopsis thaliana protein match is: embryo defective 2170 (TAIR:AT1G21390.1); Has 65 Blast hits to 65 proteins in 23 species: Archae - 0; Bacteria - 8; Metazoa - 1; Fungi - 8; Plants - 40; Viruses - 3; Other Eukaryotes - 5 (source: NCBI BLink).
Bra031193	1239	10.44	33.38	1.67686	Up	0.804336	-	GO:0016020//membrane	-	-	gi|685366748|ref|XP_009117400.1|/0/PREDICTED: uncharacterized protein LOC103842522 [Brassica rapa]	AT2G21500.1 RING/U-box superfamily protein
Bra040182	774	15.69	50.155	1.67655	Up	0.820402	-	-	-	-	gi|674954328|emb|CDX78801.1|/8.3914e-137/BnaA01g08680D [Brassica napus]	AT4G17790.1 SNARE associated Golgi protein family
Bra017465	447	11.085	35.335	1.67249	Up	0.806502	K11982|1|1e-07|53.5|vvi:100262515|E3 ubiquitin-protein ligase RNF115/126 [EC:6.3.2.19];K15692|2|2e-07|52.4|sbi:SORBI_06g034040|E3 ubiquitin-protein ligase RNF13 [EC:6.3.2.19];K10601|3|2e-07|52.4|osa:4340826|E3 ubiquitin-protein ligase synoviolin [EC:6.3.2.19]	-	GO:0046872//metal ion binding;GO:0019787//small conjugating protein transferase activity	GO:0032446//protein modification by small protein conjugation;GO:0006970//response to osmotic stress;GO:0009738//abscisic acid-activated signaling pathway;GO:0080134	gi|685359312|ref|XP_009114249.1|/4.77767e-63/PREDICTED: probable E3 ubiquitin-protein ligase RHA2B [Brassica rapa]	AT2G01150.1 RING-H2 finger protein 2B
Bra020464	447	20.46	65.06	1.66896	Up	0.82695	-	-	-	-	gi|685278143|ref|XP_009130007.1|/2.06221e-83/PREDICTED: uncharacterized protein LOC103854794 [Brassica rapa]	AT5G24610.1 unknown protein; BEST Arabidopsis thaliana protein match is: unknown protein (TAIR:AT3G49550.1); Has 1807 Blast hits to 1807 proteins in 277 species: Archae - 0; Bacteria - 0; Metazoa - 736; Fungi - 347; Plants - 385; Viruses - 0; Other Eukaryotes - 339 (source: NCBI BLink).
Bra002175	1080	20.545	65.28	1.66785	Up	0.827015	K01058|1|2e-11|67.8|gmx:100800549|phospholipase A1 [EC:3.1.1.32]	-	-	GO:0044238	gi|685375890|ref|XP_009120953.1|/0/PREDICTED: lipase-like isoform X1 [Brassica rapa]	AT5G18640.1 alpha/beta-Hydrolases superfamily protein
Bra000789	2307	24.76	78.435	1.66349	Up	0.830363	K03021|1|8e-10|64.3|ota:Ot01g06000|DNA-directed RNA polymerase III subunit RPC2 [EC:2.7.7.6]	GO:0044464	-	-	gi|685286730|ref|XP_009134294.1|/0/PREDICTED: CSC1-like protein At4g04340 [Brassica rapa]	AT4G04340.1 ERD (early-responsive to dehydration stress) family protein
Bra014361	420	23.81	75.37	1.66242	Up	0.829838	-	GO:0043231//intracellular membrane-bounded organelle	-	-	gi|685340567|ref|XP_009107083.1|/2.62753e-51/PREDICTED: uncharacterized protein LOC103832756 [Brassica rapa]	AT1G55160.1 unknown protein; FUNCTIONS IN: molecular_function unknown; INVOLVED IN: biological_process unknown; LOCATED IN: mitochondrion, plastid; EXPRESSED IN: 24 plant structures; EXPRESSED DURING: 13 growth stages; BEST Arabidopsis thaliana protein match is: unknown protein (TAIR:AT2G19530.1); Has 63 Blast hits to 63 proteins in 14 species: Archae - 0; Bacteria - 0; Metazoa - 0; Fungi - 0; Pl…
Bra036061	489	51.475	162.74	1.66063	Up	0.840029	K09286|1|4e-43|171|ath:AT4G36900|EREBP-like factor	GO:0043231//intracellular membrane-bounded organelle	GO:0003676//nucleic acid binding;GO:0001071//nucleic acid binding transcription factor activity	GO:0006351//transcription, DNA-templated;GO:0006952//defense response;GO:0009743//response to carbohydrate;GO:0008219//cell death;GO:0051707//response to other organism	gi|685362775|ref|XP_009115697.1|/1.80405e-78/PREDICTED: ethylene-responsive transcription factor ERF011 [Brassica rapa]	AT3G50260.1 cooperatively regulated by ethylene and jasmonate 1
Bra039658	531	15.79	49.88	1.65945	Up	0.818974	K09286|1|9e-25|110|aly:ARALYDRAFT_897795|EREBP-like factor	GO:0005634//nucleus	GO:0005488//binding	GO:0071495;GO:0071310//cellular response to organic substance;GO:0048583;GO:0007165//signal transduction;GO:0006351//transcription, DNA-templated;GO:0009723//response to ethylene	gi|685314042|ref|XP_009147620.1|/1.56886e-67/PREDICTED: ethylene-responsive transcription factor 4-like [Brassica rapa]	AT1G53170.1 ethylene response factor 8
Bra026570	690	18.355	57.965	1.65901	Up	0.823618	K01166|1|4e-109|391|ath:AT2G02990|ribonuclease T2 [EC:3.1.27.1]	GO:0030312//external encapsulating structure;GO:0016020//membrane	GO:0003676//nucleic acid binding;GO:0016892	GO:0009813//flavonoid biosynthetic process;GO:0009267//cellular response to starvation;GO:0007165//signal transduction;GO:0032502//developmental process	gi|685276283|ref|XP_009129105.1|/2.8153e-121/PREDICTED: ribonuclease 1 [Brassica rapa]	AT2G02990.1 ribonuclease 1
Bra011805	402	18.585	58.655	1.65812	Up	0.823979	-	-	-	-	gi|685256235|ref|XP_009131087.1|/5.40423e-53/PREDICTED: uncharacterized protein LOC103855772 [Brassica rapa]	AT4G38060.2 unknown protein; BEST Arabidopsis thaliana protein match is: unknown protein (TAIR:AT5G65480.1); Has 35333 Blast hits to 34131 proteins in 2444 species: Archae - 798; Bacteria - 22429; Metazoa - 974; Fungi - 991; Plants - 531; Viruses - 0; Other Eukaryotes - 9610 (source: NCBI BLink).
Bra008915	684	41.625	130.795	1.65179	Up	0.837157	K03232|1|3e-86|315|aly:ARALYDRAFT_909184|elongation factor 1-beta	GO:0043234//protein complex;GO:0005576//extracellular region	GO:0008135//translation factor activity, nucleic acid binding	GO:0006952//defense response;GO:0006412//translation	gi|685378156|ref|XP_009121880.1|/1.33475e-95/PREDICTED: elongation factor 1-beta 1 [Brassica rapa]	AT5G12110.1 Glutathione S-transferase
Bra010263	1299	68.025	213.05	1.64706	Up	0.841982	K00924|1|7e-137|485|osa:4342410|[EC:2.7.1.-];K07198|3|1e-68|258|aly:ARALYDRAFT_484683|5'-AMP-activated protein kinase, catalytic alpha subunit [EC:2.7.11.11]	-	GO:0004672//protein kinase activity;GO:0032559	GO:0032501//multicellular organismal process;GO:0006972//hyperosmotic response;GO:0009926//auxin polar transport	gi|685345680|ref|XP_009108957.1|/0/PREDICTED: CBL-interacting serine/threonine-protein kinase 6-like [Brassica rapa]	AT4G30960.1 CBL-interacting protein kinase 6
Bra022927	1383	92.14	288.455	1.64645	Up	0.844181	K07513|1|0.0|832|ath:AT2G33150|acetyl-CoA acyltransferase 1 [EC:2.3.1.16]	GO:0031981//nuclear lumen;GO:0009536//plastid;GO:0042579//microbody;GO:0031090//organelle membrane	GO:0016408//C-acyltransferase activity	GO:0009694//jasmonic acid metabolic process;GO:0009062//fatty acid catabolic process;GO:0009657//plastid organization;GO:0009738//abscisic acid-activated signaling pathway;GO:0006950//response to stress	gi|685284017|ref|XP_009132912.1|/0/PREDICTED: 3-ketoacyl-CoA thiolase 2, peroxisomal-like [Brassica rapa]	AT2G33150.1 peroxisomal 3-ketoacyl-CoA thiolase 3
Bra024074	480	115.69	362.105	1.64614	Up	0.845165	-	GO:0044464	-	-	gi|685294068|ref|XP_009137923.1|/2.62515e-10/PREDICTED: glycine-rich cell wall structural protein 1.0 [Brassica rapa]	AT4G30460.1 glycine-rich protein
Bra029605	585	16.965	52.855	1.63948	Up	0.819548	-	-	-	-	gi|685313106|ref|XP_009147130.1|/2.34078e-60/PREDICTED: twist-related protein 1-like [Brassica rapa]	AT3G06780.1 glycine-rich protein
Bra028545	1584	40.89	127.31	1.63853	Up	0.83614	K00873|1|0.0|1062|aly:ARALYDRAFT_906680|pyruvate kinase [EC:2.7.1.40]	GO:0016020//membrane	GO:0031420;GO:0016301//kinase activity	GO:0006796//phosphate-containing compound metabolic process;GO:0010038//response to metal ion;GO:0006007//glucose catabolic process	gi|685268337|ref|XP_009125246.1|/0/PREDICTED: pyruvate kinase, cytosolic isozyme-like [Brassica rapa]	AT3G52990.1 Pyruvate kinase family protein
Bra031401	1383	21.235	66.105	1.63832	Up	0.825473	-	GO:0031224//intrinsic component of membrane	GO:0005488//binding	-	gi|685263570|ref|XP_009105161.1|/0/PREDICTED: uncharacterized protein LOC103831063 isoform X1 [Brassica rapa]	AT1G61740.1 Sulfite exporter TauE/SafE family protein
Bra002103	1536	13.865	43.105	1.63641	Up	0.81241	K08900|1|2e-128|457|pop:POPTR_563200|mitochondrial chaperone BCS1;K13120|3|1e-104|378|vvi:100263357|protein FAM32A	GO:0016020//membrane	GO:0017111//nucleoside-triphosphatase activity;GO:0032559	-	gi|685376189|ref|XP_009121058.1|/0/PREDICTED: mitochondrial chaperone BCS1-like [Brassica rapa]	AT5G17760.1 P-loop containing nucleoside triphosphate hydrolases superfamily protein
Bra024971	4128	18.735	58.185	1.63491	Up	0.821583	-	-	-	-	gi|685326054|ref|XP_009101458.1|/0/PREDICTED: uncharacterized protein LOC103827677 isoform X1 [Brassica rapa]	AT5G47020.1 unknown protein; FUNCTIONS IN: molecular_function unknown; INVOLVED IN: biological_process unknown; LOCATED IN: endomembrane system; EXPRESSED IN: 23 plant structures; EXPRESSED DURING: 13 growth stages; BEST Arabidopsis thaliana protein match is: unknown protein (TAIR:AT5G11700.2); Has 1807 Blast hits to 1807 proteins in 277 species: Archae - 0; Bacteria - 0; Metazoa - 736; Fungi - 3…
Bra012786	771	55.25	171.425	1.63353	Up	0.838503	K06890|1|2e-132|469|aly:ARALYDRAFT_493344|	GO:0031224//intrinsic component of membrane	-	-	gi|685291501|ref|XP_009136696.1|/1.1924e-135/PREDICTED: BI1-like protein [Brassica rapa]	AT4G15470.1 Bax inhibitor-1 family protein
Bra019121	1242	46.025	142.695	1.63245	Up	0.83678	K14497|1|0.0|681|ath:AT4G26080|protein phosphatase 2C [EC:3.1.3.16]	GO:0043231//intracellular membrane-bounded organelle;GO:0043234//protein complex	GO:0019900//kinase binding;GO:0046872//metal ion binding;GO:0004721//phosphoprotein phosphatase activity	GO:0010118//stomatal movement;GO:0009767//photosynthetic electron transport chain;GO:0009738//abscisic acid-activated signaling pathway;GO:0006950//response to stress;GO:0006464//cellular protein modification process	gi|685293348|ref|XP_009137578.1|/0/PREDICTED: protein phosphatase 2C 56-like [Brassica rapa]	AT4G26080.1 Protein phosphatase 2C family protein
Bra006864	1458	22.68	70.305	1.63221	Up	0.826063	K00850|1|0.0|895|aly:ARALYDRAFT_495754|6-phosphofructokinase [EC:2.7.1.11]	GO:0043234//protein complex;GO:0044444	GO:0008443//phosphofructokinase activity;GO:0032559	GO:0006796//phosphate-containing compound metabolic process;GO:0006007//glucose catabolic process	gi|685282554|ref|XP_009132191.1|/0/PREDICTED: ATP-dependent 6-phosphofructokinase 7-like [Brassica rapa]	AT5G56630.1 phosphofructokinase 7
Bra006088	654	79.09	245.04	1.63145	Up	0.841621	-	-	-	-	gi|674954830|emb|CDX78410.1|/4.16202e-94/BnaA03g03220D [Brassica napus]	AT5G11090.1 serine-rich protein-related
Bra012417	1149	25.045	77.51	1.62986	Up	0.828082	K13648|1|4e-22|103|ppp:PHYPADRAFT_146923|alpha-1,4-galacturonosyltransferase [EC:2.4.1.43]	GO:0043231//intracellular membrane-bounded organelle	GO:0008194//UDP-glycosyltransferase activity	-	gi|674892538|emb|CDY40294.1|/0/BnaA07g09060D [Brassica napus]	AT1G24170.1 Nucleotide-diphospho-sugar transferases superfamily protein
Bra004768	267	39.34	121.65	1.62867	Up	0.83481	-	GO:0044464	GO:0016248//channel inhibitor activity;GO:0004866//endopeptidase inhibitor activity	GO:0006952//defense response	gi|674953386|emb|CDX79817.1|/3.71027e-35/BnaA05g03390D [Brassica napus]	AT2G43510.1 trypsin inhibitor protein 1
Bra022772	1128	15.27	47.16	1.62686	Up	0.814953	K01090|1|1e-81|301|sbi:SORBI_01g038410|protein phosphatase [EC:3.1.3.16];K14497|3|3e-36|150|bdi:100838998|protein phosphatase 2C [EC:3.1.3.16]	-	GO:0004721//phosphoprotein phosphatase activity	-	gi|685283596|ref|XP_009132708.1|/0/PREDICTED: probable protein phosphatase 2C 25 [Brassica rapa]	AT2G30020.1 Protein phosphatase 2C family protein
Bra021922	258	36.37	111.98	1.62242	Up	0.833415	-	GO:0031090//organelle membrane;GO:0043231//intracellular membrane-bounded organelle	-	-	gi|685301403|ref|XP_009141391.1|/7.32127e-24/PREDICTED: uncharacterized protein LOC103865346 [Brassica rapa]	AT2G34585.1 unknown protein; FUNCTIONS IN: molecular_function unknown; INVOLVED IN: biological_process unknown; LOCATED IN: plasma membrane, vacuole; EXPRESSED IN: 24 plant structures; EXPRESSED DURING: 15 growth stages; Has 43 Blast hits to 43 proteins in 9 species: Archae - 0; Bacteria - 0; Metazoa - 0; Fungi - 0; Plants - 43; Viruses - 0; Other Eukaryotes - 0 (source: NCBI BLink).
Bra013325	342	17.63	54.265	1.62199	Up	0.819122	-	-	-	-	gi|674954398|emb|CDX78871.1|/1.11756e-41/BnaA01g09380D [Brassica napus]	-
Bra026765	429	61.575	188.975	1.61778	Up	0.839077	-	GO:0016020//membrane	-	-	gi|674876434|emb|CDY55985.1|/1.98325e-64/BnaA09g56820D [Brassica napus]	AT1G15400.1 unknown protein; FUNCTIONS IN: molecular_function unknown; INVOLVED IN: biological_process unknown; LOCATED IN: plasma membrane; EXPRESSED IN: 23 plant structures; EXPRESSED DURING: 13 growth stages; BEST Arabidopsis thaliana protein match is: unknown protein (TAIR:AT1G80180.1); Has 82 Blast hits to 82 proteins in 16 species: Archae - 0; Bacteria - 4; Metazoa - 0; Fungi - 0; Plants - …
Bra010097	1644	18.23	55.87	1.61576	Up	0.819942	K00294|1|0.0|1077|ath:AT5G62530|1-pyrroline-5-carboxylate dehydrogenase [EC:1.5.1.12]	GO:0009536//plastid	GO:0016646//oxidoreductase activity, acting on the CH-NH group of donors, NAD or NADP as acceptor;GO:0046914//transition metal ion binding	GO:0006536//glutamate metabolic process;GO:0006970//response to osmotic stress	gi|674933143|emb|CDY00303.1|/0/BnaA06g22040D [Brassica napus]	AT5G62530.1 aldehyde dehydrogenase 12A1
Bra035119	1593	11.85	36.31	1.61548	Up	0.80404	K00135|1|0.0|960|ath:AT1G79440|succinate-semialdehyde dehydrogenase (NADP+) [EC:1.2.1.16]	GO:0009536//plastid;GO:0044429//mitochondrial part	GO:0016620//oxidoreductase activity, acting on the aldehyde or oxo group of donors, NAD or NADP as acceptor;GO:0046914//transition metal ion binding;GO:0000166//nucleotide binding	GO:0009314//response to radiation;GO:0006105//succinate metabolic process;GO:0009063//cellular amino acid catabolic process;GO:0006950//response to stress	gi|685339515|ref|XP_009106666.1|/0/PREDICTED: succinate-semialdehyde dehydrogenase, mitochondrial isoform X2 [Brassica rapa]	AT1G79440.1 aldehyde dehydrogenase 5F1
Bra013495	291	12.42	37.91	1.60991	Up	0.805337	-	GO:0043231//intracellular membrane-bounded organelle;GO:0031224//intrinsic component of membrane	GO:0030246//carbohydrate binding;GO:0016758//transferase activity, transferring hexosyl groups	GO:0009725//response to hormone;GO:0006464//cellular protein modification process	gi|674954554|emb|CDX79027.1|/9.83689e-25/BnaA01g10940D [Brassica napus]	AT4G21060.1 Galactosyltransferase family protein
Bra040247	168	13.24	40.365	1.6082	Up	0.80793	-	GO:0031224//intrinsic component of membrane	-	GO:0009725//response to hormone;GO:0006972//hyperosmotic response	gi|685267704|ref|XP_009124956.1|/4.40535e-22/PREDICTED: hydrophobic protein RCI2B [Brassica rapa]	AT3G05890.1 Low temperature and salt responsive protein family
Bra008242	585	184.765	562.5	1.60616	Up	0.844279	-	GO:0016020//membrane;GO:0009536//plastid	GO:0046872//metal ion binding;GO:0008092//cytoskeletal protein binding	GO:0009414//response to water deprivation;GO:0009725//response to hormone;GO:0009409//response to cold;GO:0009845//seed germination	gi|674865329|emb|CDY67724.1|/2.07274e-19/BnaA02g36030D [Brassica napus]	AT1G76180.2 Dehydrin family protein
Bra003779	669	13.255	40.225	1.60156	Up	0.807273	-	-	-	-	gi|685334414|ref|XP_009104736.1|/7.72974e-127/PREDICTED: uncharacterized protein LOC103830676 [Brassica rapa]	AT1G74940.1 Protein of unknown function (DUF581)
Bra000111	867	22.835	69.275	1.60109	Up	0.824094	K09872|1|5e-150|528|ath:AT2G39010|aquaporin PIP	GO:0031224//intrinsic component of membrane	GO:0005372//water transmembrane transporter activity	GO:0051707//response to other organism;GO:0006810//transport	gi|688953471|ref|NP_001288933.1|/4.00977e-158/probable aquaporin PIP2-6 [Brassica rapa]	AT2G39010.1 plasma membrane intrinsic protein 2E
Bra013012	2295	14.08	42.69	1.60025	Up	0.809308	K15164|1|0.0|664|aly:ARALYDRAFT_314757|mediator of RNA polymerase II transcription subunit 13;K01895|2|1e-32|140|pop:POPTR_572831|acetyl-CoA synthetase [EC:6.2.1.1]	-	GO:0016405//CoA-ligase activity	-	gi|685290887|ref|XP_009136395.1|/0/PREDICTED: probable acyl-activating enzyme 17, peroxisomal [Brassica rapa]	AT5G23050.1 acyl-activating enzyme 17
Bra037741	1458	13.09	39.565	1.59576	Up	0.806469	K13367|1|0.0|826|aly:ARALYDRAFT_486367|non-specific polyamine oxidase [EC:1.5.3.17];K11450|3|3e-54|211|smo:SELMODRAFT_449015|lysine-specific histone demethylase 1 [EC:1.-.-.-]	-	GO:0003824//catalytic activity	GO:0008152//metabolic process	gi|685302892|ref|XP_009142156.1|/0/PREDICTED: probable polyamine oxidase 2 isoform X2 [Brassica rapa]	AT2G43020.1 polyamine oxidase 2
Bra012865	1086	35.58	107.36	1.59332	Up	0.831298	K01711|1|0.0|704|ath:AT3G51160|GDPmannose 4,6-dehydratase [EC:4.2.1.47]	GO:0044444	GO:0048037//cofactor binding;GO:0016836//hydro-lyase activity	GO:0006013//mannose metabolic process;GO:0042350//GDP-L-fucose biosynthetic process	gi|685291303|ref|XP_009136601.1|/0/PREDICTED: GDP-mannose 4,6 dehydratase 2 [Brassica rapa]	AT3G51160.1 NAD(P)-binding Rossmann-fold superfamily protein
Bra029837	2022	115.595	348.67	1.59278	Up	0.841703	-	-	GO:0032559;GO:0016462//pyrophosphatase activity	-	gi|685312547|ref|XP_009146840.1|/0/PREDICTED: uncharacterized protein ycf45 [Brassica rapa]	AT3G10420.2 P-loop containing nucleoside triphosphate hydrolases superfamily protein
Bra001123	645	21.98	66.26	1.59195	Up	0.822601	-	-	GO:0030247//polysaccharide binding	GO:0050832//defense response to fungus;GO:0009725//response to hormone;GO:0006970//response to osmotic stress;GO:0009814//defense response, incompatible interaction	gi|674959464|emb|CDX74169.1|/3.85061e-104/BnaA03g28780D [Brassica napus]	AT3G04720.1 pathogenesis-related 4
Bra032038	657	33.735	101.44	1.58831	Up	0.830396	-	GO:0043231//intracellular membrane-bounded organelle	-	GO:0006952//defense response	gi|674897594|emb|CDY35374.1|/9.12992e-127/BnaA04g14730D [Brassica napus]	AT2G25110.1 stromal cell-derived factor 2-like protein precursor
Bra003234	384	22.105	66.28	1.5842	Up	0.822174	K07213|1|6e-40|159|aly:ARALYDRAFT_486064|copper chaperone	GO:0009536//plastid	GO:0005507//copper ion binding	GO:0006979//response to oxidative stress;GO:0032502//developmental process;GO:0030003//cellular cation homeostasis;GO:0006970//response to osmotic stress;GO:0034755//iron ion transmembrane transport	gi|685332563|ref|XP_009103992.1|/3.73822e-42/PREDICTED: copper transport protein CCH [Brassica rapa]	AT3G56240.1 copper chaperone
Bra017927	426	21.035	62.985	1.58222	Up	0.821058	K13448|1|2e-59|225|ath:AT1G21550|calcium-binding protein CML	-	GO:0046872//metal ion binding	-	gi|685318582|ref|XP_009149671.1|/1.21228e-76/PREDICTED: probable calcium-binding protein CML44 [Brassica rapa]	AT1G21550.1 Calcium-binding EF-hand family protein
Bra015969	1299	15.62	46.75	1.58157	Up	0.81195	K02563|1|0.0|718|aly:ARALYDRAFT_316317|UDP-N-acetylglucosamine--N-acetylmuramyl-(pentapeptide) pyrophosphoryl-undecaprenol N-acetylglucosamine transferase [EC:2.4.1.227]	GO:0009536//plastid;GO:0016020//membrane	GO:0005488//binding;GO:0008375//acetylglucosaminyltransferase activity	GO:0000270//peptidoglycan metabolic process;GO:0019276//UDP-N-acetylgalactosamine metabolic process;GO:0030258//lipid modification	gi|685337843|ref|XP_009106033.1|/0/PREDICTED: uncharacterized protein LOC103831850 [Brassica rapa]	AT1G73740.1 UDP-Glycosyltransferase superfamily protein
Bra031279	975	34.26	102.42	1.5799	Up	0.830133	-	GO:0043231//intracellular membrane-bounded organelle	GO:0003824//catalytic activity	GO:0008152//metabolic process	gi|685309752|ref|XP_009145480.1|/0/PREDICTED: clavaminate synthase-like protein At3g21360 [Brassica rapa]	AT3G21360.1 2-oxoglutarate (2OG) and Fe(II)-dependent oxygenase superfamily protein
Bra026849	573	25.47	76.09	1.57891	Up	0.825341	K11982|1|3e-16|82.8|ppp:PHYPADRAFT_169900|E3 ubiquitin-protein ligase RNF115/126 [EC:6.3.2.19]	-	GO:0046872//metal ion binding	-	gi|685367935|ref|XP_009117925.1|/8.20006e-83/PREDICTED: E3 ubiquitin-protein ligase RING1 [Brassica rapa]	AT1G14200.1 RING/U-box superfamily protein
Bra004216	1485	19.015	56.7	1.57621	Up	0.818219	K08145|1|4e-39|160|pop:POPTR_764739|MFS transporter, SP family, solute carrier family 2 (facilitated glucose transporter), member 8	GO:0031224//intrinsic component of membrane	GO:0022891//substrate-specific transmembrane transporter activity;GO:0016491//oxidoreductase activity	GO:0006810//transport	gi|674937448|emb|CDX96100.1|/0/BnaA07g26310D [Brassica napus]	AT1G67300.1 Major facilitator superfamily protein
Bra008191	957	47.235	140.755	1.57526	Up	0.834154	K08999|1|4e-33|139|rcu:RCOM_0783240|hypothetical protein	-	GO:0016788//hydrolase activity, acting on ester bonds;GO:0003676//nucleic acid binding	GO:0006952//defense response;GO:0006281//DNA repair	gi|685274119|ref|XP_009128096.1|/0/PREDICTED: bifunctional nuclease 1 [Brassica rapa]	AT1G75380.3 bifunctional nuclease in basal defense response 1
Bra037889	264	12.76	37.975	1.57342	Up	0.802383	-	-	-	-	gi|685357646|ref|XP_009113577.1|/3.36981e-32/PREDICTED: uncharacterized protein LOC103838879 [Brassica rapa]	AT4G09890.1 Protein of unknown function (DUF3511)
Bra024290	1227	19.755	58.74	1.57213	Up	0.817891	K01431|1|0.0|781|ath:AT5G64370|beta-ureidopropionase [EC:3.5.1.6]	GO:0044444	GO:0016811//hydrolase activity, acting on carbon-nitrogen (but not peptide) bonds, in linear amides	GO:0031669//cellular response to nutrient levels;GO:0006208//pyrimidine nucleobase catabolic process	gi|685320992|ref|XP_009150515.1|/0/PREDICTED: beta-ureidopropionase [Brassica rapa]	AT5G64370.1 beta-ureidopropionase
Bra033545	1107	379.495	1128.18	1.57185	Up	0.843262	K01376|1|2e-171|600|ath:AT4G16190|[EC:3.4.22.-];K01373|3|5e-113|405|ppp:PHYPADRAFT_209158|cathepsin F [EC:3.4.22.41]	GO:0043231//intracellular membrane-bounded organelle	GO:0004175//endopeptidase activity	GO:0019538//protein metabolic process	gi|674900705|emb|CDY32227.1|/0/BnaA01g17570D [Brassica napus]	AT4G16190.1 Papain family cysteine protease
Bra033774	1779	17.98	53.195	1.5649	Up	0.813903	-	-	GO:0060089;GO:0005488//binding	GO:0042743//hydrogen peroxide metabolic process;GO:0009627//systemic acquired resistance;GO:0048646//anatomical structure formation involved in morphogenesis;GO:0033554//cellular response to stress;GO:0044238;GO:0000302//response to reactive oxygen species	gi|685262476|ref|XP_009150821.1|/0/PREDICTED: senescence-associated carboxylesterase 101 [Brassica rapa]	AT3G48080.1 alpha/beta-Hydrolases superfamily protein
Bra036498	645	77.725	229.865	1.56434	Up	0.83632	K03144|1|2e-21|100|vvi:100258601|transcription initiation factor TFIIH subunit 4	GO:0031224//intrinsic component of membrane	-	-	gi|674900986|emb|CDY31941.1|/1.13262e-123/BnaA07g00540D [Brassica napus]	AT2G20740.1 Tetraspanin family protein
Bra037214	1584	17.055	50.28	1.55979	Up	0.811885	K00140|1|0.0|925|aly:ARALYDRAFT_480337|malonate-semialdehyde dehydrogenase (acetylating) / methylmalonate-semialdehyde dehydrogenase [EC:1.2.1.18 1.2.1.27]	GO:0043231//intracellular membrane-bounded organelle	GO:0046914//transition metal ion binding;GO:0016620//oxidoreductase activity, acting on the aldehyde or oxo group of donors, NAD or NADP as acceptor	GO:0008152//metabolic process;GO:0006950//response to stress	gi|685354203|ref|XP_009112235.1|/0/PREDICTED: methylmalonate-semialdehyde dehydrogenase [acylating], mitochondrial isoform X1 [Brassica rapa]	AT2G14170.1 aldehyde dehydrogenase 6B2
Bra017664	462	16.295	48.005	1.55876	Up	0.810457	K04371|1|5e-37|150|vvi:100254083|extracellular signal-regulated kinase 1/2 [EC:2.7.11.24];K14432|2|1e-07|53.9|gmx:100818567|ABA responsive element binding factor;K09060|5|6e-07|51.2|vvi:100243644|plant G-box-binding factor	GO:0009536//plastid	GO:0001071//nucleic acid binding transcription factor activity;GO:0003677//DNA binding;GO:0046983//protein dimerization activity	GO:0032055//negative regulation of translation in response to stress;GO:0034285;GO:0006351//transcription, DNA-templated	gi|674887318|emb|CDY45319.1|/5.34327e-75/BnaA03g52920D [Brassica napus]	AT4G34590.1 G-box binding factor 6
Bra000430	357	98.525	290.16	1.55829	Up	0.83806	K13448|1|2e-06|48.5|pop:POPTR_726467|calcium-binding protein CML;K02183|2|3e-06|47.8|ppp:PHYPADRAFT_180168|calmodulin	-	GO:0046872//metal ion binding	GO:0000904//cell morphogenesis involved in differentiation	gi|685285751|ref|XP_009133788.1|/2.11548e-63/PREDICTED: calcium-binding protein KIC-like [Brassica rapa]	AT2G46600.1 Calcium-binding EF-hand family protein
Bra026385	1482	13.77	40.53	1.55746	Up	0.804024	-	GO:0043231//intracellular membrane-bounded organelle	-	-	gi|685260968|ref|XP_009143005.1|/0/PREDICTED: LOW QUALITY PROTEIN: uncharacterized protein LOC103866775 [Brassica rapa]	AT4G27020.1 unknown protein; FUNCTIONS IN: molecular_function unknown; LOCATED IN: vacuole; BEST Arabidopsis thaliana protein match is: unknown protein (TAIR:AT5G54870.1); Has 1807 Blast hits to 1807 proteins in 277 species: Archae - 0; Bacteria - 0; Metazoa - 736; Fungi - 347; Plants - 385; Viruses - 0; Other Eukaryotes - 339 (source: NCBI BLink).
Bra015213	342	12.99	38.185	1.5556	Up	0.801398	K11667|1|9e-42|166|ath:AT4G38495|INO80 complex subunit C	-	-	-	gi|685371491|ref|XP_009119415.1|/2.69145e-60/PREDICTED: chromatin-remodeling complex subunit ies6-like [Brassica rapa]	AT4G38495.1 CONTAINS InterPro DOMAIN/s: YL1 nuclear, C-terminal (InterPro:IPR013272); Has 279 Blast hits to 279 proteins in 147 species: Archae - 0; Bacteria - 0; Metazoa - 94; Fungi - 133; Plants - 35; Viruses - 0; Other Eukaryotes - 17 (source: NCBI BLink).
Bra008406	1347	30.965	90.82	1.55237	Up	0.824964	-	-	-	-	gi|685274703|ref|XP_009128344.1|/0/PREDICTED: uncharacterized protein LOC103853183 isoform X1 [Brassica rapa]	AT1G79270.1 evolutionarily conserved C-terminal region 8
Bra028132	1071	33.94	99.43	1.55069	Up	0.826113	K01915|1|0.0|666|aly:ARALYDRAFT_915897|glutamine synthetase [EC:6.3.1.2]	GO:0005840//ribosome;GO:0030312//external encapsulating structure;GO:0016020//membrane	GO:0046914//transition metal ion binding;GO:0016211;GO:0032559	GO:0006541//glutamine metabolic process;GO:0042126//nitrate metabolic process	gi|685297900|ref|XP_009139734.1|/0/PREDICTED: glutamine synthetase cytosolic isozyme 1-1 [Brassica rapa]	AT5G37600.1 glutamine synthase clone R1
Bra012364	480	47.035	137.52	1.54783	Up	0.830412	-	-	GO:0005488//binding	GO:0050896//response to stimulus	gi|674907278|emb|CDY25772.1|/5.9098e-89/BnaA07g10100D [Brassica napus]	AT1G23130.1 Polyketide cyclase/dehydrase and lipid transport superfamily protein
Bra035926	975	27.165	79.29	1.54539	Up	0.822552	K00344|1|1e-178|623|ath:AT5G61510|NADPH2:quinone reductase [EC:1.6.5.5]	-	GO:0046914//transition metal ion binding;GO:0003824//catalytic activity	GO:0008152//metabolic process;GO:0009642//response to light intensity;GO:0048869//cellular developmental process	gi|685353849|ref|XP_009112092.1|/0/PREDICTED: LOW QUALITY PROTEIN: probable quinone oxidoreductase [Brassica rapa]	AT5G61510.1 GroES-like zinc-binding alcohol dehydrogenase family protein
Bra018513	1335	38.835	113.23	1.54383	Up	0.827573	-	-	-	-	gi|674936114|emb|CDX97304.1|/0/BnaA02g20950D [Brassica napus]	AT4G05150.1 Octicosapeptide/Phox/Bem1p family protein
Bra020793	1890	16.945	49.35	1.54219	Up	0.809702	K01897|1|0.0|1016|aly:ARALYDRAFT_477894|long-chain acyl-CoA synthetase [EC:6.2.1.3]	GO:0042579//microbody	GO:0015645//fatty acid ligase activity	GO:0032787//monocarboxylic acid metabolic process;GO:0042221//response to chemical	gi|674905246|emb|CDY27725.1|/0/BnaA05g31340D [Brassica napus]	AT3G05970.1 long-chain acyl-CoA synthetase 6
Bra016936	318	261.68	761.755	1.54152	Up	0.839898	K13448|1|5e-40|160|aly:ARALYDRAFT_903457|calcium-binding protein CML	GO:0016020//membrane	GO:0046872//metal ion binding	-	gi|685302571|ref|XP_009141989.1|/3.18741e-54/PREDICTED: probable calcium-binding protein CML35 [Brassica rapa]	AT2G41410.1 Calcium-binding EF-hand family protein
Bra013578	369	22.145	64.205	1.5357	Up	0.817431	K08341|1|8e-57|216|bdi:100846310|GABA(A) receptor-associated protein (autophagy-related protein 8)	GO:0044437	GO:0008641//small protein activating enzyme activity;GO:0019783//small conjugating protein-specific protease activity;GO:0016879//ligase activity, forming carbon-nitrogen bonds	GO:0044248//cellular catabolic process	gi|674954643|emb|CDX79116.1|/1.22325e-65/BnaA01g11830D [Brassica napus]	AT4G21980.2 Ubiquitin-like superfamily protein
Bra031885	183	17.29	50.11	1.53516	Up	0.810145	-	-	-	-	gi|674901616|emb|CDY31287.1|/4.02455e-27/BnaA02g34540D [Brassica napus]	-
Bra038499	792	43.22	125.04	1.53262	Up	0.828148	K13544|1|2e-129|459|aly:ARALYDRAFT_493208|pheophorbidase [EC:3.1.1.82];K08233|3|4e-37|152|ath:AT2G23600|polyneuridine-aldehyde esterase [EC:3.1.1.78]	GO:0044424	GO:0042802//identical protein binding	GO:0015996//chlorophyll catabolic process;GO:0010260//organ senescence;GO:0006730//one-carbon metabolic process	gi|685261496|ref|XP_009145604.1|/1.06421e-153/PREDICTED: pheophorbidase [Brassica rapa]	AT4G16690.1 methyl esterase 16
Bra013537	885	14.9	43.07	1.53137	Up	0.803811	-	GO:0044464	-	-	gi|685259299|ref|XP_009134968.1|/3.63895e-160/PREDICTED: transmembrane protein 184 homolog DDB_G0279555 [Brassica rapa]	AT4G21570.1 Protein of unknown function (DUF300)
Bra004034	1479	43.24	124.88	1.5301	Up	0.828131	K15397|1|0.0|981|ath:AT1G68530|3-ketoacyl-CoA synthase [EC:2.3.1.-]	GO:0043231//intracellular membrane-bounded organelle	GO:0004312//fatty acid synthase activity	GO:0009314//response to radiation;GO:0006633//fatty acid biosynthetic process;GO:0000902//cell morphogenesis;GO:0007275//multicellular organismal development;GO:0003006//developmental process involved in reproduction;GO:0006950//response to stress	gi|674925865|emb|CDY07381.1|/0/BnaA07g24600D [Brassica napus]	AT1G68530.1 3-ketoacyl-CoA synthase 6
Bra022246	1299	51.365	148.23	1.52898	Up	0.83015	K00207|1|0.0|804|ath:AT3G17810|dihydropyrimidine dehydrogenase (NADP+) [EC:1.3.1.2]	GO:0044424	GO:0004152//dihydroorotate dehydrogenase activity	GO:0019856//pyrimidine nucleobase biosynthetic process;GO:0009174	gi|685310771|ref|XP_009145974.1|/0/PREDICTED: dihydropyrimidine dehydrogenase [NADP(+)] [Brassica rapa]	AT3G17810.1 pyrimidine 1
Bra007315	990	42.82	123.02	1.52254	Up	0.827343	-	GO:0043231//intracellular membrane-bounded organelle;GO:0005576//extracellular region;GO:0030312//external encapsulating structure	GO:0043167//ion binding;GO:0008422//beta-glucosidase activity	GO:0009814//defense response, incompatible interaction;GO:0044238	gi|685364483|ref|XP_009116429.1|/0/PREDICTED: glucan endo-1,3-beta-glucosidase, acidic isoform-like [Brassica rapa]	AT3G57260.1 beta-1,3-glucanase 2
Bra011700	2079	25.475	73.155	1.52187	Up	0.818941	K14494|1|2e-20|99.4|ppp:PHYPADRAFT_235432|DELLA protein	-	-	-	gi|674958198|emb|CDX75590.1|/0/BnaA01g01120D [Brassica napus]	AT4G36710.1 GRAS family transcription factor
Bra039661	1731	159.11	454.325	1.5137	Up	0.836484	-	GO:0005773//vacuole;GO:0031224//intrinsic component of membrane;GO:0031090//organelle membrane	GO:0046872//metal ion binding	GO:0006810//transport	gi|685314038|ref|XP_009147618.1|/0/PREDICTED: uncharacterized protein LOC103871140 [Brassica rapa]	AT1G53210.1 sodium/calcium exchanger family protein / calcium-binding EF hand family protein
Bra036635	2109	28.76	82.04	1.51226	Up	0.820402	-	GO:0005773//vacuole;GO:0031090//organelle membrane	-	GO:0006810//transport	gi|685355392|ref|XP_009112720.1|/0/PREDICTED: SPX domain-containing membrane protein At1g63010-like [Brassica rapa]	AT1G63010.4 Major Facilitator Superfamily with SPX (SYG1/Pho81/XPR1) domain-containing protein
Bra004620	642	127.285	362.94	1.51167	Up	0.835582	K13448|1|6e-67|251|aly:ARALYDRAFT_903457|calcium-binding protein CML	GO:0016020//membrane	GO:0046872//metal ion binding	-	gi|685304060|ref|XP_009142741.1|/4.86934e-90/PREDICTED: probable calcium-binding protein CML35 [Brassica rapa]	AT2G41410.1 Calcium-binding EF-hand family protein
Bra002914	309	204.99	584.225	1.51097	Up	0.837223	-	-	-	-	gi|685373204|ref|XP_009120052.1|/6.55308e-38/PREDICTED: putative lipid-transfer protein DIR1 [Brassica rapa]	AT5G55410.2 Bifunctional inhibitor/lipid-transfer protein/seed storage 2S albumin superfamily protein
Bra007383	399	15.51	44.195	1.51068	Up	0.803187	K08504|1|2e-61|231|ath:AT3G58170|blocked early in transport 1	GO:0016020//membrane;GO:0043231//intracellular membrane-bounded organelle	GO:0005515//protein binding;GO:0022892	-	gi|674927271|emb|CDY06050.1|/7.92541e-68/BnaA09g37300D [Brassica napus]	AT3G58170.1 BET1P/SFT1P-like protein 14A
Bra002338	606	73.015	207.765	1.50869	Up	0.831873	K13464|1|5e-40|161|ath:AT5G20900|jasmonate ZIM domain-containing protein	-	GO:0005488//binding	-	gi|685375304|ref|XP_009120757.1|/9.97951e-74/PREDICTED: protein TIFY 3B-like [Brassica rapa]	AT5G20900.1 jasmonate-zim-domain protein 12
Bra027936	1272	55.005	156.125	1.50507	Up	0.829247	K08057|1|0.0|632|aly:ARALYDRAFT_888161|calreticulin	GO:0031090//organelle membrane;GO:0009536//plastid	GO:0046872//metal ion binding;GO:0005515//protein binding	GO:0055065//metal ion homeostasis;GO:0006970//response to osmotic stress;GO:0044267//cellular protein metabolic process;GO:0010038//response to metal ion	gi|685357191|ref|XP_009113389.1|/0/PREDICTED: calreticulin-1-like [Brassica rapa]	AT1G56340.2 calreticulin 1a
Bra000875	642	17.335	49.185	1.50453	Up	0.806453	K00799|1|1e-105|380|ath:AT2G02930|glutathione S-transferase [EC:2.5.1.18]	GO:0009532//plastid stroma;GO:0005576//extracellular region;GO:0016020//membrane	GO:0042277//peptide binding;GO:0016765//transferase activity, transferring alkyl or aryl (other than methyl) groups	GO:0006952//defense response;GO:0006970//response to osmotic stress;GO:0009404//toxin metabolic process;GO:0010038//response to metal ion	gi|685286994|ref|XP_009134426.1|/1.23855e-121/PREDICTED: glutathione S-transferase F3-like [Brassica rapa]	AT2G02930.1 glutathione S-transferase F3
Bra008848	303	30.095	85.38	1.50437	Up	0.820336	-	-	-	-	gi|685377925|ref|XP_009121789.1|/4.54678e-54/PREDICTED: uncharacterized protein LOC103846594 [Brassica rapa]	AT5G13190.1 CONTAINS InterPro DOMAIN/s: LPS-induced tumor necrosis factor alpha factor (InterPro:IPR006629); Has 30201 Blast hits to 17322 proteins in 780 species: Archae - 12; Bacteria - 1396; Metazoa - 17338; Fungi - 3422; Plants - 5037; Viruses - 0; Other Eukaryotes - 2996 (source: NCBI BLink).
Bra016931	552	34.235	97.045	1.50318	Up	0.82242	-	GO:0044464	-	-	gi|685302578|ref|XP_009141992.1|/2.54671e-93/PREDICTED: uncharacterized protein LOC103865886 [Brassica rapa]	AT2G41475.1 Embryo-specific protein 3, (ATS3)
Bra030367	297	69.93	197.89	1.50072	Up	0.830773	-	-	-	-	gi|685308257|ref|XP_009144819.1|/7.00579e-52/PREDICTED: uncharacterized protein LOC103868482 [Brassica rapa]	AT1G52720.1 unknown protein; BEST Arabidopsis thaliana protein match is: unknown protein (TAIR:AT3G15630.1); Has 61 Blast hits to 61 proteins in 13 species: Archae - 0; Bacteria - 0; Metazoa - 0; Fungi - 0; Plants - 61; Viruses - 0; Other Eukaryotes - 0 (source: NCBI BLink).
Bra025649	426	42.51	120.265	1.50034	Up	0.825538	-	GO:0016020//membrane	-	GO:0006970//response to osmotic stress	gi|674958872|emb|CDX74433.1|/3.89638e-78/BnaA04g09560D [Brassica napus]	AT5G39720.1 avirulence induced gene 2 like protein
Bra024284	375	17.105	48.35	1.4991	Up	0.805845	-	-	-	-	gi|674888929|emb|CDY43807.1|/3.61901e-42/BnaA06g23430D [Brassica napus]	AT5G64310.1 arabinogalactan protein 1
Bra038173	423	23.925	67.495	1.49626	Up	0.815511	-	-	-	-	-	-
Bra020255	1080	21.555	60.665	1.49284	Up	0.812016	K01366|1|3e-172|602|ath:AT5G60360|cathepsin H [EC:3.4.22.16]	GO:0043231//intracellular membrane-bounded organelle	GO:0004175//endopeptidase activity;GO:0005488//binding	GO:0009725//response to hormone;GO:0019538//protein metabolic process;GO:0032502//developmental process	gi|685271156|ref|XP_009126614.1|/0/PREDICTED: thiol protease aleurain-like [Brassica rapa]	AT5G60360.1 aleurain-like protease
Bra016937	807	26.59	74.82	1.49254	Up	0.816939	-	GO:0043231//intracellular membrane-bounded organelle	GO:0016741	GO:0006730//one-carbon metabolic process;GO:0010038//response to metal ion	gi|685302569|ref|XP_009141988.1|/6.73985e-157/PREDICTED: putative methyltransferase DDB_G0268948 [Brassica rapa]	AT2G41380.1 S-adenosyl-L-methionine-dependent methyltransferases superfamily protein
Bra040513	792	19.28	54.165	1.49026	Up	0.808717	K08332|1|1e-12|71.6|vcn:VOLCADRAFT_41528|vacuolar protein 8	-	-	-	gi|685267862|ref|XP_009125026.1|/1.91678e-138/PREDICTED: U-box domain-containing protein 4 [Brassica rapa]	AT3G01400.1 ARM repeat superfamily protein
Bra011408	432	72.555	203.64	1.48887	Up	0.830182	K03676|1|2e-10|62.4|smo:SELMODRAFT_229902|glutaredoxin 3	-	GO:0015036//disulfide oxidoreductase activity	GO:0019725//cellular homeostasis	gi|674957927|emb|CDX75319.1|/2.78638e-59/BnaA01g03830D [Brassica napus]	AT4G33040.1 Thioredoxin superfamily protein
Bra014665	702	15.34	42.98	1.48637	Up	0.800594	-	-	-	GO:0009628//response to abiotic stimulus;GO:0006950//response to stress	gi|685296459|ref|XP_009139070.1|/2.57268e-74/PREDICTED: uncharacterized protein LOC103863082 isoform X2 [Brassica rapa]	AT3G56880.1 VQ motif-containing protein
Bra020412	1893	15.76	44.1	1.48451	Up	0.800364	K15404|1|3e-95|347|ath:AT1G02205|aldehyde decarbonylase [EC:4.1.99.5]	GO:0031224//intrinsic component of membrane	GO:0046914//transition metal ion binding;GO:0003824//catalytic activity	GO:0006633//fatty acid biosynthetic process;GO:0007275//multicellular organismal development;GO:0003006//developmental process involved in reproduction	gi|685271536|ref|XP_009126813.1|/0/PREDICTED: protein ECERIFERUM 3 [Brassica rapa]	AT5G57800.1 Fatty acid hydroxylase superfamily
Bra007718	309	18.725	52.28	1.48129	Up	0.806469	K03676|1|4e-23|104|bdi:100821530|glutaredoxin 3	GO:0044464	GO:0015036//disulfide oxidoreductase activity	GO:0019725//cellular homeostasis	gi|674921808|emb|CDY11466.1|/6.10158e-54/BnaA09g40320D [Brassica napus]	AT3G62960.1 Thioredoxin superfamily protein
Bra022926	669	19.765	55.18	1.4812	Up	0.80811	K08515|1|6e-111|397|aly:ARALYDRAFT_887649|vesicle-associated membrane protein 7;K08511|2|1e-107|386|ath:AT2G32670|vesicle-associated membrane protein 72	GO:0005635//nuclear envelope;GO:0031090//organelle membrane;GO:0031224//intrinsic component of membrane	GO:0005488//binding	GO:0006405//RNA export from nucleus;GO:0009725//response to hormone	gi|674948723|emb|CDX84702.1|/5.37167e-116/BnaA03g15280D [Brassica napus]	AT2G33120.1 synaptobrevin-related protein 1
Bra003560	1851	17.88	49.89	1.4804	Up	0.804959	K03301|1|0.0|1084|aly:ARALYDRAFT_477222|ATP:ADP antiporter, AAA family	GO:0009526//plastid envelope;GO:0031224//intrinsic component of membrane	GO:0032559	GO:0051234//establishment of localization	gi|685333726|ref|XP_009104454.1|/0/PREDICTED: ADP,ATP carrier protein 1, chloroplastic-like [Brassica rapa]	AT1G80300.1 nucleotide transporter 1
Bra005632	555	16.305	45.415	1.47785	Up	0.801398	K00676|1|2e-16|83.2|ppp:PHYPADRAFT_104139|ribosomal-protein-alanine N-acetyltransferase [EC:2.3.1.128]	-	GO:0016407//acetyltransferase activity	GO:0009725//response to hormone	gi|685306621|ref|XP_009144033.1|/3.98185e-104/PREDICTED: uncharacterized protein LOC103867686 [Brassica rapa]	AT2G32020.1 Acyl-CoA N-acyltransferases (NAT) superfamily protein
Bra037525	1296	27.21	75.52	1.47272	Up	0.814904	-	-	-	-	gi|685323849|ref|XP_009151584.1|/0/PREDICTED: uncharacterized protein LOC103874911 [Brassica rapa]	AT5G47860.1 Protein of unknown function (DUF1350)
Bra009633	1635	16.795	46.58	1.47168	Up	0.801021	K06119|1|0.0|840|aly:ARALYDRAFT_660023|sulfoquinovosyltransferase [EC:2.4.1.-]	GO:0009526//plastid envelope	GO:0008194//UDP-glycosyltransferase activity	GO:0008610//lipid biosynthetic process;GO:0006664//glycolipid metabolic process;GO:0009267//cellular response to starvation	gi|685380300|ref|XP_009122830.1|/0/PREDICTED: uncharacterized protein LOC103847496 [Brassica rapa]	AT5G01220.1 sulfoquinovosyldiacylglycerol 2
Bra010728	519	621.99	1723.39	1.47029	Up	0.8355	K01802|1|3e-84|308|ath:AT4G38740|peptidylprolyl isomerase [EC:5.2.1.8]	GO:0044444;GO:0005576//extracellular region;GO:0016020//membrane	GO:0016859//cis-trans isomerase activity	GO:0044267//cellular protein metabolic process;GO:0023052//signaling;GO:0010038//response to metal ion	gi|692314704|ref|NP_001289049.1|/4.06893e-88/peptidyl-prolyl cis-trans isomerase CYP18-3 [Brassica rapa]	AT4G38740.1 rotamase CYP 1
Bra010983	996	20.72	57.325	1.46814	Up	0.808127	-	-	-	-	gi|685348226|ref|XP_009109867.1|/1.22638e-147/PREDICTED: uncharacterized protein LOC103835443 [Brassica rapa]	AT1G68140.3 Protein of unknown function (DUF1644)
Bra025755	984	35.66	98.595	1.46721	Up	0.819565	K08999|1|1e-30|132|rcu:RCOM_0783240|hypothetical protein	-	GO:0016788//hydrolase activity, acting on ester bonds;GO:0003676//nucleic acid binding	GO:0006952//defense response;GO:0006281//DNA repair	gi|685317941|ref|XP_009149449.1|/0/PREDICTED: bifunctional nuclease 2 [Brassica rapa]	AT1G19660.2 Wound-responsive family protein
Bra007647	357	36.355	100.5	1.46697	Up	0.819795	-	GO:0031224//intrinsic component of membrane	GO:0016787//hydrolase activity	-	gi|685365532|ref|XP_009116869.1|/7.75068e-45/PREDICTED: uncharacterized protein LOC103842023 [Brassica rapa]	AT3G61980.1 serine protease inhibitor, Kazal-type family protein
Bra017502	744	70.6	194.65	1.46314	Up	0.826884	-	GO:0031224//intrinsic component of membrane;GO:0043231//intracellular membrane-bounded organelle;GO:0012505//endomembrane system	GO:0005488//binding	GO:0006631//fatty acid metabolic process;GO:0043066//negative regulation of apoptotic process;GO:0006950//response to stress;GO:0006984//ER-nucleus signaling pathway	gi|674889245|emb|CDY43441.1|/1.1605e-123/BnaAnng07130D [Brassica napus]	AT5G47120.1 BAX inhibitor 1
Bra011923	1374	18.02	49.42	1.4555	Up	0.802416	K06694|1|2e-10|65.5|ath:AT2G03430|26S proteasome non-ATPase regulatory subunit 10	-	GO:0005488//binding	-	gi|685331858|ref|XP_009103716.1|/0/PREDICTED: putative E3 ubiquitin-protein ligase XBAT31 [Brassica rapa]	AT2G28840.1 XB3 ortholog 1 in Arabidopsis thaliana
Bra028781	1056	19.62	53.755	1.45407	Up	0.803991	K07213|1|5e-29|126|osa:4344925|copper chaperone	GO:0009534//chloroplast thylakoid;GO:0009532//plastid stroma	GO:0031406//carboxylic acid binding	-	gi|685269106|ref|XP_009125575.1|/1.23541e-161/PREDICTED: unknown protein DS12 from 2D-PAGE of leaf, chloroplastic-like [Brassica rapa]	AT5G04740.1 ACT domain-containing protein
Bra030702	1290	38.66	105.765	1.45195	Up	0.818629	K15397|1|1e-95|348|ath:AT1G01120|3-ketoacyl-CoA synthase [EC:2.3.1.-]	GO:0043231//intracellular membrane-bounded organelle	GO:0016747//transferase activity, transferring acyl groups other than amino-acyl groups	GO:0009314//response to radiation;GO:0006950//response to stress;GO:0006631//fatty acid metabolic process	gi|674874486|emb|CDY58836.1|/0/BnaAnng15520D [Brassica napus]	AT1G07720.1 3-ketoacyl-CoA synthase 3
Bra015594	450	347.55	950.71	1.45178	Up	0.832759	-	-	-	-	-	AT1G07610.1 metallothionein 1C
Bra004455	1086	41.155	112.295	1.44815	Up	0.81963	K09584|1|0.0|647|aly:ARALYDRAFT_904222|protein disulfide-isomerase A6 [EC:5.3.4.1]	GO:0005618//cell wall;GO:0043231//intracellular membrane-bounded organelle;GO:0031090//organelle membrane	GO:0016862//intramolecular oxidoreductase activity, interconverting keto- and enol-groups;GO:0015036//disulfide oxidoreductase activity	GO:0010038//response to metal ion;GO:0048229//gametophyte development;GO:0033554//cellular response to stress;GO:0019725//cellular homeostasis;GO:0018904;GO:0003006//developmental process involved in reproduction	gi|674953675|emb|CDX80106.1|/0/BnaA05g00500D [Brassica napus]	AT2G47470.1 thioredoxin family protein
Bra003039	642	20	54.54	1.44731	Up	0.804516	-	-	-	-	gi|674918850|emb|CDY14357.1|/1.93577e-106/BnaA10g06980D [Brassica napus]	AT5G53730.1 Late embryogenesis abundant (LEA) hydroxyproline-rich glycoprotein family
Bra019285	807	73.625	200.33	1.44411	Up	0.824947	K00861|1|3e-16|83.6|vcn:VOLCADRAFT_103251|riboflavin kinase [EC:2.7.1.26];K07748|2|3e-10|63.5|ppp:PHYPADRAFT_145942|sterol-4alpha-carboxylate 3-dehydrogenase (decarboxylating) [EC:1.1.1.170]	GO:0031090//organelle membrane;GO:0043231//intracellular membrane-bounded organelle	-	-	gi|685292901|ref|XP_009137373.1|/4.46928e-135/PREDICTED: reticulon-like protein B1 [Brassica rapa]	AT4G23630.1 VIRB2-interacting protein 1
Bra039116	783	116.265	316.13	1.4431	Up	0.82841	K09338|1|9e-96|347|ath:AT3G01470|homeobox-leucine zipper protein	GO:0043231//intracellular membrane-bounded organelle	GO:0042802//identical protein binding;GO:0001071//nucleic acid binding transcription factor activity;GO:0003677//DNA binding	GO:0009416//response to light stimulus;GO:0006355//regulation of transcription, DNA-templated;GO:0009887//organ morphogenesis;GO:0006970//response to osmotic stress	gi|674895318|emb|CDY37519.1|/2.06855e-143/BnaA05g33840D [Brassica napus]	AT3G01470.1 homeobox 1
Bra006186	747	26.475	71.95	1.44236	Up	0.8109	-	-	GO:0003676//nucleic acid binding;GO:0001071//nucleic acid binding transcription factor activity	GO:0010087//phloem or xylem histogenesis;GO:0032501//multicellular organismal process	gi|685280834|ref|XP_009131323.1|/6.08618e-134/PREDICTED: NAC transcription factor 29-like isoform X1 [Brassica rapa]	AT5G13180.1 NAC domain containing protein 83
Bra013450	732	97.57	264.945	1.44118	Up	0.827179	-	GO:0016020//membrane;GO:0009536//plastid	GO:0035091//phosphatidylinositol binding;GO:0046914//transition metal ion binding;GO:0005515//protein binding	GO:0006952//defense response	gi|674867926|emb|CDY66354.1|/3.3174e-67/BnaA01g35060D [Brassica napus]	AT4G20260.3 plasma-membrane associated cation-binding protein 1
Bra006870	645	49.97	135.4	1.43809	Up	0.820878	K12382|1|1e-49|194|pop:POPTR_825403|saposin	GO:0043231//intracellular membrane-bounded organelle	-	GO:0044238	gi|674955303|emb|CDX78031.1|/4.77101e-113/BnaA09g32260D [Brassica napus]	AT3G51730.1 saposin B domain-containing protein
Bra024812	1176	18.29	49.545	1.43768	Up	0.800299	K08282|1|4e-46|183|ota:Ot16g02900|non-specific serine/threonine protein kinase [EC:2.7.11.1]	-	GO:0060089;GO:0005488//binding;GO:0004673//protein histidine kinase activity	GO:0006351//transcription, DNA-templated;GO:0007165//signal transduction	gi|685325503|ref|XP_009101246.1|/0/PREDICTED: protein TWIN LOV 1 isoform X1 [Brassica rapa]	AT2G02710.1 PAS/LOV protein B
Bra011196	495	123.86	335.47	1.43747	Up	0.828722	-	GO:0044464	-	-	gi|685294068|ref|XP_009137923.1|/2.47656e-09/PREDICTED: glycine-rich cell wall structural protein 1.0 [Brassica rapa]	AT4G30460.1 glycine-rich protein
Bra000227	375	27.775	75.165	1.43627	Up	0.81172	-	GO:0044424	GO:0005488//binding	GO:0006950//response to stress;GO:0009642//response to light intensity	gi|674897495|emb|CDY35413.1|/7.90365e-53/BnaA03g19470D [Brassica napus]	AT2G41430.3 dehydration-induced protein (ERD15)
Bra017730	2520	22.115	59.835	1.43596	Up	0.806272	K01115|1|0.0|1527|aly:ARALYDRAFT_491063|phospholipase D [EC:3.1.4.4]	GO:0043231//intracellular membrane-bounded organelle;GO:0016020//membrane	GO:0046872//metal ion binding;GO:0004620//phospholipase activity	GO:0006950//response to stress;GO:0008219//cell death;GO:0006650//glycerophospholipid metabolic process	gi|685295002|ref|XP_009138388.1|/0/PREDICTED: phospholipase D delta-like [Brassica rapa]	AT4G35790.2 phospholipase D delta
Bra039976	816	35.295	95.48	1.43573	Up	0.816135	K08081|1|3e-126|448|aly:ARALYDRAFT_481850|tropine dehydrogenase [EC:1.1.1.206]	-	GO:0016616//oxidoreductase activity, acting on the CH-OH group of donors, NAD or NADP as acceptor	GO:0006952//defense response;GO:0008152//metabolic process;GO:0032502//developmental process	gi|685300532|ref|XP_009140995.1|/9.0094e-150/PREDICTED: tropinone reductase homolog At1g07440-like isoform X1 [Brassica rapa]	AT2G29350.1 senescence-associated gene 13
Bra005704	630	21.435	57.775	1.43048	Up	0.804155	-	-	-	-	gi|674877026|emb|CDY55115.1|/2.18095e-106/BnaA03g54940D [Brassica napus]	AT5G02040.2 prenylated RAB acceptor 1.A1
Bra010823	414	18.895	50.925	1.43037	Up	0.800102	-	-	-	-	gi|685348531|ref|XP_009109997.1|/2.97978e-44/PREDICTED: uncharacterized protein LOC103835577 [Brassica rapa]	AT1G29640.1 Protein of unknown function, DUF584
Bra016127	1089	41.965	112.9	1.42779	Up	0.817645	K00430|1|0.0|665|aly:ARALYDRAFT_895007|peroxidase [EC:1.11.1.7]	GO:0005618//cell wall;GO:0043231//intracellular membrane-bounded organelle	GO:0016209//antioxidant activity;GO:0005506//iron ion binding;GO:0003824//catalytic activity	GO:0006950//response to stress;GO:0008152//metabolic process	gi|674936916|emb|CDX96335.1|/0/BnaA07g29460D [Brassica napus]	AT1G71695.1 Peroxidase superfamily protein
Bra019784	1203	38.2	102.73	1.42721	Up	0.816069	K13148|1|2e-74|277|rcu:RCOM_0598050|integrator complex subunit 11 [EC:3.1.27.-]	-	GO:0046872//metal ion binding;GO:0019787//small conjugating protein transferase activity	GO:0032446//protein modification by small protein conjugation	gi|685315892|ref|XP_009148567.1|/1.33079e-169/PREDICTED: E3 ubiquitin-protein ligase At1g12760 [Brassica rapa]	AT1G12760.1 Zinc finger, C3HC4 type (RING finger) family protein
Bra027987	1113	47.67	128.115	1.42629	Up	0.81922	-	-	-	-	gi|674879881|emb|CDY52306.1|/0/BnaA09g16180D [Brassica napus]	AT5G03610.1 GDSL-like Lipase/Acylhydrolase superfamily protein
Bra026809	987	21.1	56.525	1.42165	Up	0.80171	K08235|1|4e-167|585|aly:ARALYDRAFT_471659|xyloglucan:xyloglucosyl transferase [EC:2.4.1.207]	GO:0005576//extracellular region;GO:0030312//external encapsulating structure	GO:0016798//hydrolase activity, acting on glycosyl bonds;GO:0016758//transferase activity, transferring hexosyl groups	GO:0044042//glucan metabolic process;GO:0048608//reproductive structure development;GO:0009888//tissue development	gi|685367836|ref|XP_009117879.1|/0/PREDICTED: probable xyloglucan endotransglucosylase/hydrolase protein 28 [Brassica rapa]	AT1G14720.1 xyloglucan endotransglucosylase/hydrolase 28
Bra031940	1050	25.09	67.17	1.4207	Up	0.8066	K15422|1|2e-160|563|ath:AT5G64000|3'(2'), 5'-bisphosphate nucleotidase / inositol polyphosphate 1-phosphatase [EC:3.1.3.7 3.1.3.57]	-	GO:0008252//nucleotidase activity	GO:0044237//cellular metabolic process	gi|685278984|ref|XP_009130429.1|/0/PREDICTED: SAL2 phosphatase-like isoform X1 [Brassica rapa]	AT5G64000.1 Inositol monophosphatase family protein
Bra010952	243	36.085	96.395	1.41756	Up	0.813575	-	-	-	-	gi|674905433|emb|CDY27609.1|/3.05773e-36/BnaA09g27980D [Brassica napus]	AT1G27330.1 Ribosome associated membrane protein RAMP4
Bra033657	1383	23.855	63.64	1.41564	Up	0.805009	K01376|1|0.0|769|ath:AT5G43060|[EC:3.4.22.-];K01365|4|1e-110|397|smo:SELMODRAFT_183539|cathepsin L [EC:3.4.22.15]	GO:0005576//extracellular region;GO:0009536//plastid	GO:0004175//endopeptidase activity;GO:0005488//binding	GO:0019538//protein metabolic process;GO:0006970//response to osmotic stress	gi|685326917|ref|XP_009101816.1|/0/PREDICTED: cysteine proteinase RD21a [Brassica rapa]	AT5G43060.1 Granulin repeat cysteine protease family protein
Bra002217	207	384.65	1024.41	1.41318	Up	0.827475	-	GO:0016020//membrane	-	GO:0009725//response to hormone;GO:0010038//response to metal ion	gi|688952616|ref|NP_001288918.1|/1.5139e-32/stem-specific protein TSJT1-like [Brassica rapa]	AT5G19140.1 Aluminium induced protein with YGL and LRDR motifs
Bra013210	2166	39.16	104.065	1.41003	Up	0.812738	K01897|1|0.0|1251|aly:ARALYDRAFT_673706|long-chain acyl-CoA synthetase [EC:6.2.1.3]	GO:0043231//intracellular membrane-bounded organelle	GO:0015645//fatty acid ligase activity	GO:0006631//fatty acid metabolic process	gi|685290343|ref|XP_009136133.1|/0/PREDICTED: long chain acyl-CoA synthetase 8 [Brassica rapa]	AT2G04350.2 AMP-dependent synthetase and ligase family protein
Bra035067	1365	24.845	65.875	1.40678	Up	0.804122	-	GO:0005576//extracellular region;GO:0005618//cell wall;GO:0016020//membrane	GO:0030246//carbohydrate binding	-	gi|685339331|ref|XP_009106596.1|/0/PREDICTED: epidermis-specific secreted glycoprotein EP1-like [Brassica rapa]	AT1G78830.1 Curculin-like (mannose-binding) lectin family protein
Bra036073	513	24.975	65.88	1.39936	Up	0.803433	-	GO:0009536//plastid	-	-	gi|674902355|emb|CDY30591.1|/1.26308e-71/BnaAnng03660D [Brassica napus]	AT3G50350.2 Protein of unknown function (DUF1685)
Bra007216	612	25.255	66.545	1.39776	Up	0.803696	-	GO:0043231//intracellular membrane-bounded organelle	-	GO:0006810//transport	gi|674905852|emb|CDY27245.1|/4.78728e-106/BnaA09g35570D [Brassica napus]	AT3G56110.2 prenylated RAB acceptor 1.B1
Bra005727	1521	23.195	61.06	1.39641	Up	0.801398	-	-	-	GO:0006972//hyperosmotic response	gi|685279571|ref|XP_009130706.1|/0/PREDICTED: uncharacterized protein LOC103855471 [Brassica rapa]	AT5G02480.1 HSP20-like chaperones superfamily protein
Bra029107	396	27.98	73.21	1.38764	Up	0.805091	-	-	-	-	gi|685283206|ref|XP_009132515.1|/3.08352e-55/PREDICTED: uncharacterized protein LOC103857113 [Brassica rapa]	AT5G52750.1 Heavy metal transport/detoxification superfamily protein
Bra028148	507	29.875	77.925	1.38315	Up	0.805353	-	-	-	-	gi|674959000|emb|CDX74561.1|/2.0015e-94/BnaA04g08280D [Brassica napus]	AT5G37740.1 Calcium-dependent lipid-binding (CaLB domain) family protein
Bra013693	825	28.875	75.255	1.38197	Up	0.804647	-	-	-	-	gi|685259760|ref|XP_009137042.1|/5.78196e-111/PREDICTED: uncharacterized protein LOC103861082 [Brassica rapa]	AT4G23470.1 PLAC8 family protein
Bra020896	630	34.105	88.87	1.38171	Up	0.807864	K12184|1|6e-97|350|aly:ARALYDRAFT_492725|ESCRT-I complex subunit VPS28	GO:0010008//endosome membrane	-	GO:0051234//establishment of localization	gi|685344483|ref|XP_009108494.1|/4.74816e-99/PREDICTED: vacuolar protein sorting-associated protein 28 homolog 1-like [Brassica rapa]	AT4G21560.3 vacuolar protein sorting-associated protein 28 homolog 1
Bra010775	2172	63.205	164.56	1.3805	Up	0.816086	K03021|1|2e-08|59.7|ota:Ot01g06000|DNA-directed RNA polymerase III subunit RPC2 [EC:2.7.7.6]	GO:0031090//organelle membrane;GO:0009536//plastid	-	-	gi|674943197|emb|CDX90246.1|/0/BnaA08g17380D [Brassica napus]	AT1G30360.1 Early-responsive to dehydration stress protein (ERD4)
Bra024749	1494	140.36	365.215	1.37961	Up	0.822158	K15397|1|0.0|909|aly:ARALYDRAFT_894621|3-ketoacyl-CoA synthase [EC:2.3.1.-]	GO:0043231//intracellular membrane-bounded organelle	GO:0004312//fatty acid synthase activity	GO:0009314//response to radiation;GO:0006633//fatty acid biosynthetic process;GO:0000902//cell morphogenesis;GO:0007275//multicellular organismal development;GO:0003006//developmental process involved in reproduction;GO:0006950//response to stress	gi|685361840|ref|XP_009115318.1|/0/PREDICTED: 3-ketoacyl-CoA synthase 5 [Brassica rapa]	AT1G68530.1 3-ketoacyl-CoA synthase 6
Bra020608	1311	37.56	97.62	1.37798	Up	0.809439	K13065|1|5e-18|90.5|zma:100279386|shikimate O-hydroxycinnamoyltransferase [EC:2.3.1.133]	-	-	-	gi|685277791|ref|XP_009129839.1|/0/PREDICTED: protein ECERIFERUM 26-like [Brassica rapa]	AT4G29250.1 HXXXD-type acyl-transferase family protein
Bra006215	1467	41.315	107.355	1.37765	Up	0.810654	-	-	-	GO:0006787	gi|685280911|ref|XP_009131361.1|/0/PREDICTED: pheophytinase, chloroplastic [Brassica rapa]	AT5G13800.1 pheophytinase
Bra001974	1524	25.895	67.28	1.3775	Up	0.802087	K15397|1|0.0|966|aly:ARALYDRAFT_900287|3-ketoacyl-CoA synthase [EC:2.3.1.-]	GO:0044464	GO:0016747//transferase activity, transferring acyl groups other than amino-acyl groups	GO:0009314//response to radiation;GO:0007275//multicellular organismal development;GO:0006950//response to stress;GO:0006631//fatty acid metabolic process	gi|685376594|ref|XP_009121221.1|/0/PREDICTED: 3-ketoacyl-CoA synthase 9 [Brassica rapa]	AT2G16280.1 3-ketoacyl-CoA synthase 9
Bra001865	1041	68.955	178.99	1.37615	Up	0.816791	K00540|1|7e-173|604|aly:ARALYDRAFT_479749|[EC:1.-.-.-]	GO:0031967;GO:0043231//intracellular membrane-bounded organelle;GO:0031224//intrinsic component of membrane	GO:0043169//cation binding;GO:0016682//oxidoreductase activity, acting on diphenols and related substances as donors, oxygen as acceptor	GO:0032501//multicellular organismal process;GO:0006950//response to stress;GO:0007165//signal transduction;GO:0015980//energy derivation by oxidation of organic compounds	gi|685289721|ref|XP_009135803.1|/0/PREDICTED: ubiquinol oxidase 1a, mitochondrial-like [Brassica rapa]	AT3G22370.1 alternative oxidase 1A
Bra000458	489	87.285	225.2	1.3674	Up	0.817825	-	GO:0043231//intracellular membrane-bounded organelle	-	GO:0050896//response to stimulus	gi|674950133|emb|CDX83322.1|/3.06745e-89/BnaA03g21840D [Brassica napus]	AT2G47710.1 Adenine nucleotide alpha hydrolases-like superfamily protein
Bra022870	1938	26.92	69.075	1.35949	Up	0.800627	K00924|1|2e-62|238|ath:AT1G75820|[EC:2.7.1.-]	GO:0016020//membrane	GO:0004674//protein serine/threonine kinase activity;GO:0032559	GO:0006952//defense response;GO:0008219//cell death;GO:0007167//enzyme linked receptor protein signaling pathway;GO:0051093//negative regulation of developmental process;GO:0006464//cellular protein modification process	gi|674948775|emb|CDX84754.1|/0/BnaA03g14760D [Brassica napus]	AT2G31880.1 Leucine-rich repeat protein kinase family protein
Bra008067	525	33.93	86.795	1.35505	Up	0.80532	K12197|1|1e-77|286|aly:ARALYDRAFT_476433|charged multivesicular body protein 1	-	-	GO:0016197//endosomal transport;GO:0009880//embryonic pattern specification;GO:0003006//developmental process involved in reproduction	gi|674873711|emb|CDY59930.1|/1.03496e-79/BnaC06g43840D [Brassica napus]	AT1G73030.1 SNF7 family protein
Bra032013	360	103.365	264.13	1.3535	Up	0.816972	-	-	-	-	gi|674889572|emb|CDY43147.1|/1.22944e-53/BnaA05g32390D [Brassica napus]	AT3G03150.1 unknown protein; FUNCTIONS IN: molecular_function unknown; INVOLVED IN: biological_process unknown; LOCATED IN: mitochondrion; EXPRESSED IN: 22 plant structures; EXPRESSED DURING: 13 growth stages; BEST Arabidopsis thaliana protein match is: unknown protein (TAIR:AT5G17165.1); Has 39 Blast hits to 39 proteins in 11 species: Archae - 0; Bacteria - 0; Metazoa - 0; Fungi - 0; Plants - 39…
Bra021214	492	263.425	672.655	1.35247	Up	0.821042	-	GO:0016020//membrane	-	GO:0006950//response to stress	gi|674879413|emb|CDY52729.1|/1.72524e-83/BnaC01g44140D [Brassica napus]	AT3G17020.1 Adenine nucleotide alpha hydrolases-like superfamily protein
Bra030795	429	43.575	110.955	1.3484	Up	0.807995	-	-	-	GO:0050896//response to stimulus	gi|685350606|ref|XP_009110805.1|/3.15806e-71/PREDICTED: universal stress protein A-like protein [Brassica rapa]	AT1G09740.1 Adenine nucleotide alpha hydrolases-like superfamily protein
Bra032315	684	395.125	1003.72	1.34498	Up	0.819877	-	GO:0009534//chloroplast thylakoid;GO:0009706//chloroplast inner membrane	-	GO:0009414//response to water deprivation;GO:0009725//response to hormone;GO:0009409//response to cold	gi|685361661|ref|XP_009115242.1|/5.6156e-118/PREDICTED: cold-regulated 413 inner membrane protein 2, chloroplastic-like [Brassica rapa]	AT1G29390.1 cold regulated 314 thylakoid membrane 2
Bra002686	903	42.86	108.655	1.34205	Up	0.805501	K10268|1|1e-13|75.1|smo:SELMODRAFT_118815|F-box and leucine-rich repeat protein 2/20	GO:0031461//cullin-RING ubiquitin ligase complex	GO:0005488//binding	-	gi|685374017|ref|XP_009120306.1|/8.29076e-177/PREDICTED: F-box protein SKIP1 [Brassica rapa]	AT5G57900.1 SKP1 interacting partner 1
Bra009459	996	43.885	111.09	1.33993	Up	0.805944	K08241|1|7e-61|232|aly:ARALYDRAFT_472188|jasmonate O-methyltransferase [EC:2.1.1.141]	-	GO:0016741	GO:0010038//response to metal ion	gi|685379835|ref|XP_009122605.1|/0/PREDICTED: salicylate/benzoate carboxyl methyltransferase-like [Brassica rapa]	AT5G04380.1 S-adenosyl-L-methionine-dependent methyltransferases superfamily protein
Bra040592	786	109.315	276.655	1.3396	Up	0.815314	K06630|1|3e-131|465|pop:POPTR_580782|tyrosine 3-monooxygenase/tryptophan 5-monooxygenase activation protein	GO:0009532//plastid stroma;GO:0016020//membrane	GO:0051219//phosphoprotein binding	GO:0048827//phyllome development;GO:0009639//response to red or far red light	gi|674880727|emb|CDY51543.1|/4.55707e-150/BnaA05g33430D [Brassica napus]	AT3G02520.1 general regulatory factor 7
Bra024820	642	54.685	137.59	1.33116	Up	0.807158	K01800|1|9e-112|400|ath:AT2G02390|maleylacetoacetate isomerase [EC:5.2.1.2]	GO:0044424	GO:0016765//transferase activity, transferring alkyl or aryl (other than methyl) groups	GO:0009404//toxin metabolic process;GO:0006520//cellular amino acid metabolic process	gi|685325536|ref|XP_009101261.1|/1.01349e-122/PREDICTED: glutathione S-transferase Z1 [Brassica rapa]	AT2G02390.1 glutathione S-transferase zeta 1
Bra016811	852	82.375	207.23	1.33095	Up	0.811343	K01759|1|2e-156|549|aly:ARALYDRAFT_888497|lactoylglutathione lyase [EC:4.4.1.5]	GO:0009526//plastid envelope;GO:0016020//membrane;GO:0042579//microbody	GO:0043169//cation binding;GO:0016846//carbon-sulfur lyase activity	GO:0044238;GO:0010038//response to metal ion	gi|685350363|ref|XP_009110694.1|/7.24871e-164/PREDICTED: putative lactoylglutathione lyase [Brassica rapa]	AT1G11840.6 glyoxalase I homolog
Bra022245	1248	303.815	763.55	1.32953	Up	0.817628	-	GO:0009536//plastid	-	GO:0009411//response to UV	gi|685310774|ref|XP_009145975.1|/0/PREDICTED: uncharacterized protein LOC103869650 [Brassica rapa]	AT3G17800.1 Protein of unknown function (DUF760)
Bra021385	561	46.705	117.13	1.32646	Up	0.805173	-	-	-	GO:0009628//response to abiotic stimulus	gi|685266257|ref|XP_009118899.1|/4.54711e-101/PREDICTED: putative gamma-glutamylcyclotransferase At3g02910 [Brassica rapa]	AT3G02910.1 AIG2-like (avirulence induced gene) family protein
Bra021200	732	46.325	116.135	1.32594	Up	0.805009	K09286|1|9e-88|320|ath:AT3G16770|EREBP-like factor	GO:0043231//intracellular membrane-bounded organelle;GO:0016020//membrane	GO:0003676//nucleic acid binding;GO:0001071//nucleic acid binding transcription factor activity	GO:0000160//phosphorelay signal transduction system;GO:0009725//response to hormone;GO:0010467//gene expression;GO:0009607//response to biotic stimulus	gi|685265377|ref|XP_009114507.1|/1.28426e-117/PREDICTED: ethylene-responsive transcription factor RAP2-3 [Brassica rapa]	AT3G16770.1 ethylene-responsive element binding protein
Bra023098	726	49.52	122.295	1.30428	Up	0.802448	-	-	-	-	gi|685284433|ref|XP_009133117.1|/4.4367e-141/PREDICTED: cell number regulator 8 [Brassica rapa]	AT2G37110.1 PLAC8 family protein
Bra038725	618	45.705	112.78	1.30309	Up	0.80125	-	-	GO:0046914//transition metal ion binding;GO:0004866//endopeptidase inhibitor activity	GO:0050896//response to stimulus;GO:0051346//negative regulation of hydrolase activity	gi|685266588|ref|XP_009120653.1|/2.41651e-104/PREDICTED: cysteine proteinase inhibitor 6-like [Brassica rapa]	AT3G12490.2 cystatin B
Bra029697	1695	44.09	108.54	1.2997	Up	0.80061	K05857|1|0.0|1069|aly:ARALYDRAFT_671640|phosphatidylinositol phospholipase C, delta [EC:3.1.4.11]	GO:0016020//membrane	GO:0060089;GO:0046872//metal ion binding;GO:0004629//phospholipase C activity	GO:0007165//signal transduction;GO:0044238	gi|685312860|ref|XP_009147001.1|/0/PREDICTED: phosphoinositide phospholipase C 2 [Brassica rapa]	AT3G08510.2 phospholipase C 2
Bra002216	711	549.005	1351.27	1.29942	Up	0.815643	K01953|1|3e-11|66.6|ppp:PHYPADRAFT_173106|asparagine synthase (glutamine-hydrolysing) [EC:6.3.5.4]	GO:0016020//membrane	-	GO:0009725//response to hormone;GO:0010038//response to metal ion	gi|688952616|ref|NP_001288918.1|/7.07217e-135/stem-specific protein TSJT1-like [Brassica rapa]	AT5G19140.1 Aluminium induced protein with YGL and LRDR motifs
Bra011812	276	98.135	240.65	1.2941	Up	0.808323	K12946|1|2e-26|114|aly:ARALYDRAFT_353015|signal peptidase complex subunit 1 [EC:3.4.-.-]	GO:0044464	-	-	gi|674958309|emb|CDX75701.1|/1.95468e-27/BnaA01g00010D [Brassica napus]	AT2G22425.2 Microsomal signal peptidase 12 kDa subunit (SPC12)
Bra000315	837	57.875	141.765	1.29249	Up	0.803236	K03791|1|2e-115|412|aly:ARALYDRAFT_483472|putative chitinase;K01183|3|1e-63|241|pop:POPTR_826290|chitinase [EC:3.2.1.14]	GO:0005576//extracellular region	GO:0004553//hydrolase activity, hydrolyzing O-glycosyl compounds;GO:0030247//polysaccharide binding	GO:0006026	gi|685285430|ref|XP_009133622.1|/1.67106e-140/PREDICTED: basic endochitinase CHB4 [Brassica rapa]	AT2G43620.1 Chitinase family protein
Bra001886	588	226.985	554.27	1.28799	Up	0.812639	-	-	-	GO:0006950//response to stress;GO:0015995//chlorophyll biosynthetic process;GO:0009639//response to red or far red light;GO:0009411//response to UV	gi|685289772|ref|XP_009135830.1|/1.04813e-88/PREDICTED: early light-induced protein 1, chloroplastic-like [Brassica rapa]	AT3G22840.1 Chlorophyll A-B binding family protein
Bra024933	378	87.91	214.37	1.286	Up	0.807306	-	GO:0005746//mitochondrial respiratory chain;GO:0030964	-	-	gi|685325903|ref|XP_009101408.1|/2.25008e-58/PREDICTED: NADH dehydrogenase [ubiquinone] 1 beta subcomplex subunit 8, mitochondrial isoform X2 [Brassica rapa]	AT5G47570.1 unknown protein; Has 30201 Blast hits to 17322 proteins in 780 species: Archae - 12; Bacteria - 1396; Metazoa - 17338; Fungi - 3422; Plants - 5037; Viruses - 0; Other Eukaryotes - 2996 (source: NCBI BLink).
Bra007683	492	89.63	218.305	1.28429	Up	0.806518	-	GO:0043231//intracellular membrane-bounded organelle	-	GO:0050896//response to stimulus	gi|685365624|ref|XP_009116916.1|/9.84143e-92/PREDICTED: universal stress protein A-like protein isoform X1 [Brassica rapa]	AT3G62550.1 Adenine nucleotide alpha hydrolases-like superfamily protein
Bra013911	582	49.055	119.465	1.28412	Up	0.800118	-	-	-	-	gi|685260332|ref|XP_009139426.1|/2.44433e-92/PREDICTED: uncharacterized protein LOC103863432 [Brassica rapa]	AT4G25670.2 unknown protein; LOCATED IN: cellular_component unknown; EXPRESSED IN: male gametophyte, pollen tube; EXPRESSED DURING: M germinated pollen stage; BEST Arabidopsis thaliana protein match is: unknown protein (TAIR:AT4G25690.2).
Bra030498	1074	90.675	220.49	1.28194	Up	0.806551	K01363|1|0.0|672|aly:ARALYDRAFT_887368|cathepsin B [EC:3.4.22.1]	GO:0043231//intracellular membrane-bounded organelle	GO:0004175//endopeptidase activity	GO:0019222//regulation of metabolic process;GO:0019538//protein metabolic process	gi|685351562|ref|XP_009111203.1|/0/PREDICTED: cathepsin B [Brassica rapa]	AT1G02305.1 Cysteine proteinases superfamily protein
Bra018469	2232	124.385	302.46	1.28193	Up	0.808898	K00276|1|2e-72|272|cme:CMS002C|primary-amine oxidase [EC:1.4.3.21]	GO:0043231//intracellular membrane-bounded organelle	GO:0046914//transition metal ion binding;GO:0016641//oxidoreductase activity, acting on the CH-NH2 group of donors, oxygen as acceptor;GO:0048037//cofactor binding	GO:0006807//nitrogen compound metabolic process	gi|685307543|ref|XP_009144486.1|/0/PREDICTED: primary amine oxidase [Brassica rapa]	AT4G12290.1 Copper amine oxidase family protein
Bra013774	2469	94.215	227.855	1.27409	Up	0.805763	K09487|1|0.0|1350|aly:ARALYDRAFT_492441|heat shock protein 90kDa beta	GO:0009536//plastid;GO:0031410//cytoplasmic vesicle;GO:0031090//organelle membrane	GO:0005515//protein binding;GO:0032559	GO:0010038//response to metal ion;GO:0044267//cellular protein metabolic process;GO:0009933//meristem structural organization;GO:0010073//meristem maintenance;GO:0006970//response to osmotic stress;GO:0015031//protein transport	gi|685259927|ref|XP_009137776.1|/0/PREDICTED: endoplasmin homolog [Brassica rapa]	AT4G24190.1heat shock protein 90-7
Bra023777	1245	187.515	453.22	1.27321	Up	0.80985	K00924|1|2e-92|337|osa:4342410|[EC:2.7.1.-];K07198|3|1e-66|251|zma:100192108|5'-AMP-activated protein kinase, catalytic alpha subunit [EC:2.7.11.11]	-	GO:0004672//protein kinase activity;GO:0000166//nucleotide binding	GO:0009987//cellular process	gi|685264179|ref|XP_009108423.1|/0/PREDICTED: CBL-interacting serine/threonine-protein kinase 7 [Brassica rapa]	AT3G23000.1 CBL-interacting protein kinase 7
Bra033875	279	154.92	374.085	1.27184	Up	0.80916	K08762|1|3e-32|134|osa:4333305|diazepam-binding inhibitor (GABA receptor modulator, acyl-CoA-binding protein)	GO:0044444;GO:0016020//membrane	GO:0005543//phospholipid binding;GO:0005504//fatty acid binding	GO:0010876//lipid localization;GO:0051234//establishment of localization;GO:0009409//response to cold;GO:0009642//response to light intensity	gi|685309214|ref|XP_009145229.1|/2.6515e-42/PREDICTED: acyl-CoA-binding protein [Brassica rapa]	AT1G31812.1 acyl-CoA-binding protein 6
Bra004295	597	78.81	189.39	1.26491	Up	0.803039	-	-	-	GO:0050896//response to stimulus	gi|685336056|ref|XP_009105374.1|/1.96135e-82/PREDICTED: universal stress protein A-like protein [Brassica rapa]	AT1G68300.1 Adenine nucleotide alpha hydrolases-like superfamily protein
Bra004320	1779	175.685	416.885	1.24666	Up	0.806912	K14638|1|1e-131|468|ppp:PHYPADRAFT_134814|solute carrier family 15 (peptide/histidine transporter), member 3/4	GO:0044464	-	GO:0015833//peptide transport	gi|685336126|ref|XP_009105401.1|/0/PREDICTED: protein NRT1/ PTR FAMILY 3.1 [Brassica rapa]	AT1G68570.1 Major facilitator superfamily protein
Bra037191	375	95.925	227.445	1.24554	Up	0.803154	K11996|1|8e-08|53.1|ppp:PHYPADRAFT_149194|adenylyltransferase and sulfurtransferase	GO:0009536//plastid	GO:0016783//sulfurtransferase activity	-	gi|685354286|ref|XP_009112267.1|/2.28897e-68/PREDICTED: thiosulfate sulfurtransferase 16, chloroplastic isoform X1 [Brassica rapa]	AT5G66040.1 sulfurtransferase protein 16
Bra029193	2832	100.605	238.22	1.24359	Up	0.801513	K03696|1|0.0|1154|zma:100383428|ATP-dependent Clp protease ATP-binding subunit ClpC	GO:0009526//plastid envelope;GO:0009532//plastid stroma	GO:0017111//nucleoside-triphosphatase activity;GO:0032559	GO:0043170	gi|685283446|ref|XP_009132633.1|/0/PREDICTED: chaperone protein ClpD, chloroplastic [Brassica rapa]	AT5G51070.1 Clp ATPase
Bra013576	996	700.77	1642.61	1.22897	Up	0.80514	K00430|1|0.0|666|ath:AT4G21960|peroxidase [EC:1.11.1.7]	GO:0044464	GO:0005506//iron ion binding;GO:0003824//catalytic activity;GO:0016209//antioxidant activity	GO:0008152//metabolic process;GO:0006950//response to stress	gi|674950623|emb|CDX82887.1|/0/BnaC01g13370D [Brassica napus]	AT4G21960.1 Peroxidase superfamily protein
Bra037761	507	1861.91	810.905	-1.19918	Down	0.800282	K02701|1|2e-71|265|aly:ARALYDRAFT_496598|photosystem I subunit PsaN	GO:0009534//chloroplast thylakoid;GO:0009522//photosystem I	GO:0005515//protein binding	GO:0009767//photosynthetic electron transport chain	gi|685353904|ref|XP_009112113.1|/1.15967e-77/PREDICTED: photosystem I reaction center subunit N, chloroplastic-like [Brassica rapa]	AT5G64040.1 photosystem I reaction center subunit PSI-N, chloroplast, putative / PSI-N, putative (PSAN)
Bra010717	1182	7645.69	3317.14	-1.20471	Down	0.800939	K01623|1|0.0|787|aly:ARALYDRAFT_490667|fructose-bisphosphate aldolase, class I [EC:4.1.2.13]	GO:0005840//ribosome;GO:0009526//plastid envelope;GO:0009570//chloroplast stroma;GO:0005576//extracellular region;GO:0044436	GO:0016832//aldehyde-lyase activity	GO:0006007//glucose catabolic process;GO:0010038//response to metal ion;GO:0009725//response to hormone	gi|685347158|ref|XP_009109511.1|/0/PREDICTED: probable fructose-bisphosphate aldolase 2, chloroplastic [Brassica rapa]	AT4G38970.1 fructose-bisphosphate aldolase 2
Bra014473	2208	746.31	320.88	-1.21774	Down	0.801874	K00615|1|0.0|1318|ath:AT3G60750|transketolase [EC:2.2.1.1]	GO:0009526//plastid envelope;GO:0009532//plastid stroma	GO:0005488//binding;GO:0016744	GO:0006970//response to osmotic stress;GO:0010038//response to metal ion	gi|685295916|ref|XP_009138817.1|/0/PREDICTED: transketolase-1, chloroplastic [Brassica rapa]	AT3G60750.1 Transketolase
Bra025297	801	1285.51	551.14	-1.22185	Down	0.802957	K08913|1|2e-141|499|ath:AT3G27690|light-harvesting complex II chlorophyll a/b binding protein 2	GO:0009526//plastid envelope;GO:0043234//protein complex;GO:0009534//chloroplast thylakoid	GO:0046906//tetrapyrrole binding	GO:0009639//response to red or far red light;GO:0006091//generation of precursor metabolites and energy	gi|674882641|emb|CDY49770.1|/4.62221e-142/BnaA02g29010D [Brassica napus]	AT3G27690.1 photosystem II light harvesting complex gene 2.3
Bra027083	816	1517.76	649.26	-1.22508	Down	0.805074	K08909|1|1e-127|453|aly:ARALYDRAFT_475174|light-harvesting complex I chlorophyll a/b binding protein 3	GO:0043234//protein complex;GO:0009570//chloroplast stroma;GO:0009534//chloroplast thylakoid	GO:0046906//tetrapyrrole binding	GO:0006091//generation of precursor metabolites and energy	gi|685356466|ref|XP_009113128.1|/7.65572e-136/PREDICTED: chlorophyll a-b binding protein 8, chloroplastic-like [Brassica rapa]	AT1G61520.3 photosystem I light harvesting complex gene 3
Bra033901	1380	500.29	212.845	-1.23296	Down	0.802531	K13811|1|0.0|868|aly:ARALYDRAFT_479799|3'-phosphoadenosine 5'-phosphosulfate synthase [EC:2.7.7.4 2.7.1.25]	GO:0016020//membrane;GO:0009536//plastid	GO:0004779//sulfate adenylyltransferase activity	GO:0006790//sulfur compound metabolic process;GO:0010038//response to metal ion	gi|685309264|ref|XP_009145251.1|/0/PREDICTED: ATP sulfurylase 1, chloroplastic-like [Brassica rapa]	AT3G22890.1 ATP sulfurylase 1
Bra023597	816	309.395	131.285	-1.23675	Down	0.803318	K00366|1|5e-07|53.1|ota:Ot10g00930|ferredoxin-nitrite reductase [EC:1.7.7.1]	GO:0009526//plastid envelope;GO:0009534//chloroplast thylakoid	GO:0043169//cation binding	-	gi|674947691|emb|CDX85473.1|/7.57939e-113/BnaA02g03400D [Brassica napus]	AT5G17170.1 rubredoxin family protein
Bra028901	930	1214.32	513.215	-1.24251	Down	0.807815	K06215|1|6e-169|591|aly:ARALYDRAFT_908014|pyridoxine biosynthesis protein [EC:4.-.-.-]	GO:0044444;GO:0016020//membrane	GO:0042802//identical protein binding;GO:0046983//protein dimerization activity	GO:0042364;GO:0009108//coenzyme biosynthetic process;GO:0006778//porphyrin-containing compound metabolic process;GO:0008614//pyridoxine metabolic process;GO:0006972//hyperosmotic response;GO:0033194//response to hydroperoxide;GO:0019752//carboxylic acid metabolic process	gi|674928344|emb|CDY04839.1|/9.49583e-170/BnaAnng00210D [Brassica napus]	AT5G01410.1 Aldolase-type TIM barrel family protein
Bra029188	648	443.885	187.165	-1.24588	Down	0.807175	K01724|1|1e-18|90.9|pop:POPTR_887818|4a-hydroxytetrahydrobiopterin dehydratase [EC:4.2.1.96]	GO:0009536//plastid	GO:0016836//hydro-lyase activity	GO:0009108//coenzyme biosynthetic process	gi|674893905|emb|CDY38850.1|/9.29707e-124/BnaA03g13290D [Brassica napus]	AT5G51110.1 Transcriptional coactivator/pterin dehydratase
Bra038805	1428	668.215	280.83	-1.25062	Down	0.808537	K02358|1|0.0|767|aly:ARALYDRAFT_914622|elongation factor Tu	GO:0031981//nuclear lumen;GO:0009532//plastid stroma;GO:0043232;GO:0009526//plastid envelope;GO:0009534//chloroplast thylakoid;GO:0005576//extracellular region	GO:0017111//nucleoside-triphosphatase activity;GO:0008135//translation factor activity, nucleic acid binding;GO:0032561//guanyl ribonucleotide binding	GO:0006412//translation;GO:0009207	gi|685292399|ref|XP_009137148.1|/0/PREDICTED: elongation factor Tu, chloroplastic-like [Brassica rapa]	AT4G20360.1 RAB GTPase homolog E1B
Bra032734	1506	324.935	135.89	-1.25771	Down	0.807355	K12156|1|0.0|837|ath:AT4G13770|cytochrome P450, family 83, subfamily A, polypeptide 1 [EC:1.14.-.-];K11818|3|6e-164|575|ath:AT4G31500|cytochrome P450, family 83, subfamily B, polypeptide 1 [EC:1.14.-.-];K00517|5|2e-87|321|ath:AT5G25120|[EC:1.14.-.-]	-	GO:0004497//monooxygenase activity;GO:0005506//iron ion binding	GO:0019758	gi|685297614|ref|XP_009139598.1|/0/PREDICTED: cytochrome P450 83A1 [Brassica rapa]	AT4G13770.1 cytochrome P450, family 83, subfamily A, polypeptide 1
Bra035054	723	207.92	86.945	-1.25785	Down	0.803975	K02871|1|7e-135|477|aly:ARALYDRAFT_477028|large subunit ribosomal protein L13	GO:0009532//plastid stroma;GO:0030529//ribonucleoprotein complex	GO:0005198//structural molecule activity	GO:0003006//developmental process involved in reproduction;GO:0010467//gene expression	gi|685339278|ref|XP_009106578.1|/1.67128e-140/PREDICTED: 50S ribosomal protein L13, chloroplastic [Brassica rapa]	AT1G78630.1 Ribosomal protein L13 family protein
Bra037953	2223	374.8	156.695	-1.25816	Down	0.808159	K13447|1|2e-19|96.3|bdi:100826490|respiratory burst oxidase [EC:1.6.3.- 1.11.1.-]	GO:0031224//intrinsic component of membrane;GO:0009536//plastid	GO:0046914//transition metal ion binding;GO:0016723//oxidoreductase activity, oxidizing metal ions, NAD or NADP as acceptor;GO:0050662//coenzyme binding	GO:0009314//response to radiation;GO:0022900//electron transport chain	gi|685370235|ref|XP_009118912.1|/0/PREDICTED: ferric reduction oxidase 7, chloroplastic [Brassica rapa]	AT5G49740.1 ferric reduction oxidase 7
Bra027021	2328	477.295	199.495	-1.25853	Down	0.808996	K02355|1|0.0|1496|aly:ARALYDRAFT_475077|elongation factor G	GO:0009532//plastid stroma;GO:0009526//plastid envelope;GO:0005576//extracellular region	GO:0017111//nucleoside-triphosphatase activity;GO:0008135//translation factor activity, nucleic acid binding;GO:0032561//guanyl ribonucleotide binding;GO:0032559	GO:0006412//translation;GO:0009207;GO:0009657//plastid organization;GO:0007275//multicellular organismal development	gi|685356273|ref|XP_009113053.1|/0/PREDICTED: elongation factor G, chloroplastic [Brassica rapa]	AT1G62750.1 Translation elongation factor EFG/EF2 protein
Bra016889	702	298.105	124.555	-1.25904	Down	0.80683	-	GO:0009534//chloroplast thylakoid	-	-	gi|685302694|ref|XP_009142050.1|/1.10117e-123/PREDICTED: rhodanese-like domain-containing protein 9, chloroplastic [Brassica rapa]	AT2G42220.1 Rhodanese/Cell cycle control phosphatase superfamily protein
Bra040120	828	375.58	156.735	-1.26079	Down	0.808159	K01807|1|2e-118|423|aly:ARALYDRAFT_896526|ribose 5-phosphate isomerase A [EC:5.3.1.6]	-	GO:0016861//intramolecular oxidoreductase activity, interconverting aldoses and ketoses	GO:0006098//pentose-phosphate shunt	gi|685267752|ref|XP_009124979.1|/1.26954e-126/PREDICTED: probable ribose-5-phosphate isomerase 3, chloroplastic [Brassica rapa]	AT3G04790.1 Ribose 5-phosphate isomerase, type A protein
Bra005687	930	772.935	321.595	-1.2651	Down	0.811458	K06215|1|1e-167|586|aly:ARALYDRAFT_908014|pyridoxine biosynthesis protein [EC:4.-.-.-]	GO:0044444;GO:0016020//membrane	GO:0042802//identical protein binding;GO:0046983//protein dimerization activity	GO:0042364;GO:0009108//coenzyme biosynthetic process;GO:0006778//porphyrin-containing compound metabolic process;GO:0008614//pyridoxine metabolic process;GO:0006972//hyperosmotic response;GO:0033194//response to hydroperoxide;GO:0019752//carboxylic acid metabolic process	gi|674921921|emb|CDY11202.1|/7.33162e-170/BnaA03g00380D [Brassica napus]	AT5G01410.1 Aldolase-type TIM barrel family protein
Bra017452	291	424.57	176.075	-1.26981	Down	0.809489	K02961|1|1e-29|125|aly:ARALYDRAFT_477281|small subunit ribosomal protein S17	GO:0009526//plastid envelope;GO:0000314//organellar small ribosomal subunit;GO:0009532//plastid stroma	GO:0005198//structural molecule activity	GO:0010467//gene expression	gi|685359282|ref|XP_009114240.1|/6.56959e-36/PREDICTED: 30S ribosomal protein S17, chloroplastic-like [Brassica rapa]	AT1G79850.1 ribosomal protein S17
Bra005424	486	571.615	236.95	-1.27046	Down	0.810687	K08912|1|2e-88|322|ath:AT2G34430|light-harvesting complex II chlorophyll a/b binding protein 1	GO:0009521;GO:0009526//plastid envelope;GO:0031224//intrinsic component of membrane;GO:0009570//chloroplast stroma;GO:0009534//chloroplast thylakoid	GO:0046906//tetrapyrrole binding;GO:0043169//cation binding	GO:0006464//cellular protein modification process;GO:0006091//generation of precursor metabolites and energy	gi|674949320|emb|CDX84316.1|/3.89013e-88/BnaC04g10780D [Brassica napus]	AT2G34430.1 light-harvesting chlorophyll-protein complex II subunit B1
Bra010621	663	155.7	64.525	-1.27084	Down	0.802104	-	GO:0043234//protein complex;GO:0009534//chloroplast thylakoid	GO:0016651//oxidoreductase activity, acting on NAD(P)H	GO:0010257//NADH dehydrogenase complex assembly;GO:0008152//metabolic process	gi|674943347|emb|CDX90396.1|/6.34992e-129/BnaA08g15880D [Brassica napus]	AT4G37925.1 subunit NDH-M of NAD(P)H:plastoquinone dehydrogenase complex
Bra016481	1095	235.6	97.47	-1.27331	Down	0.806108	K02641|1|7e-177|617|aly:ARALYDRAFT_472228|ferredoxin--NADP+ reductase [EC:1.18.1.2]	GO:0034357;GO:0009532//plastid stroma;GO:0009534//chloroplast thylakoid;GO:0005576//extracellular region	GO:0008937//ferredoxin-NAD(P) reductase activity;GO:0050662//coenzyme binding;GO:0008187//poly-pyrimidine tract binding;GO:0000166//nucleotide binding	GO:0050832//defense response to fungus;GO:0008152//metabolic process	gi|685349198|ref|XP_009110244.1|/0/PREDICTED: ferredoxin--NADP reductase, leaf isozyme 2, chloroplastic [Brassica rapa]	AT1G20020.1 ferredoxin-NADP(+)-oxidoreductase 2
Bra015820	240	707.535	292.37	-1.27501	Down	0.812262	-	-	-	-	-	-
Bra014841	1239	397.35	164.165	-1.27526	Down	0.810375	K03841|1|0.0|702|aly:ARALYDRAFT_485801|fructose-1,6-bisphosphatase I [EC:3.1.3.11]	GO:0009532//plastid stroma;GO:0009526//plastid envelope;GO:0005576//extracellular region	GO:0043169//cation binding;GO:0019203//carbohydrate phosphatase activity	GO:0005984//disaccharide metabolic process;GO:0009767//photosynthetic electron transport chain;GO:0015977//carbon fixation;GO:0006000//fructose metabolic process;GO:0006950//response to stress	gi|685296890|ref|XP_009139266.1|/0/PREDICTED: fructose-1,6-bisphosphatase, chloroplastic [Brassica rapa]	AT3G54050.2 high cyclic electron flow 1
Bra023235	1194	999.35	412.83	-1.27544	Down	0.813066	K00855|1|0.0|756|aly:ARALYDRAFT_890765|phosphoribulokinase [EC:2.7.1.19]	GO:0009532//plastid stroma;GO:0009526//plastid envelope;GO:0009534//chloroplast thylakoid;GO:0005576//extracellular region	GO:0016301//kinase activity;GO:0032559	GO:0006952//defense response;GO:0044238;GO:0006796//phosphate-containing compound metabolic process	gi|674874210|emb|CDY59208.1|/0/BnaA09g54020D [Brassica napus]	AT1G32060.1 phosphoribulokinase
Bra025305	570	247.865	102.21	-1.27802	Down	0.807503	K02935|1|8e-52|201|aly:ARALYDRAFT_484572|large subunit ribosomal protein L7/L12	GO:0000315//organellar large ribosomal subunit;GO:0009532//plastid stroma;GO:0009534//chloroplast thylakoid	GO:0005488//binding;GO:0005198//structural molecule activity	GO:0006952//defense response;GO:0010467//gene expression	gi|685324670|ref|XP_009151917.1|/7.17509e-60/PREDICTED: 50S ribosomal protein L12-1, chloroplastic-like [Brassica rapa]	AT3G27830.1 ribosomal protein L12-A
Bra019675	567	141.635	58.385	-1.27851	Down	0.802202	K08901|1|3e-88|322|aly:ARALYDRAFT_471574|photosystem II oxygen-evolving enhancer protein 3	GO:0009523//photosystem II;GO:0009534//chloroplast thylakoid	GO:0046872//metal ion binding;GO:0009055//electron carrier activity	GO:0022900//electron transport chain	gi|685316167|ref|XP_009148697.1|/8.18483e-100/PREDICTED: psbQ-like protein 1, chloroplastic [Brassica rapa]	AT1G14150.1 PsbQ-like 2
Bra022742	1050	2717.93	1116.27	-1.28382	Down	0.814231	K03146|1|0.0|639|aly:ARALYDRAFT_918614|thiamine biosynthetic enzyme	GO:0009532//plastid stroma;GO:0009941//chloroplast envelope	GO:0046914//transition metal ion binding;GO:0042802//identical protein binding	GO:0006772//thiamine metabolic process;GO:0033554//cellular response to stress;GO:0018130	gi|685272021|ref|XP_009127069.1|/0/PREDICTED: thiamine thiazole synthase, chloroplastic-like [Brassica rapa]	AT5G54770.1 thiazole biosynthetic enzyme, chloroplast (ARA6) (THI1) (THI4)
Bra030660	786	1200.93	493.1	-1.28421	Down	0.813411	K02717|1|2e-114|409|aly:ARALYDRAFT_470689|photosystem II oxygen-evolving enhancer protein 2	GO:0009532//plastid stroma;GO:0009526//plastid envelope;GO:0009534//chloroplast thylakoid;GO:0009523//photosystem II;GO:0005576//extracellular region	GO:0008187//poly-pyrimidine tract binding;GO:0046872//metal ion binding	GO:0006952//defense response;GO:0006091//generation of precursor metabolites and energy	gi|685351019|ref|XP_009110976.1|/1.89551e-125/PREDICTED: oxygen-evolving enhancer protein 2, chloroplastic [Brassica rapa]	AT1G06680.1 photosystem II subunit P-1
Bra002617	306	362.38	148.445	-1.28757	Down	0.81108	-	-	-	-	gi|674877783|emb|CDY54176.1|/2.4334e-41/BnaA10g29120D [Brassica napus]	AT3G47070.1 LOCATED IN: thylakoid, chloroplast thylakoid membrane, chloroplast, chloroplast envelope; EXPRESSED IN: 22 plant structures; EXPRESSED DURING: 13 growth stages; CONTAINS InterPro DOMAIN/s: Thylakoid soluble phosphoprotein TSP9 (InterPro:IPR021584); Has 37 Blast hits to 37 proteins in 10 species: Archae - 0; Bacteria - 0; Metazoa - 0; Fungi - 0; Plants - 37; Viruses - 0; Other Eukaryot…
Bra028345	1458	298.64	122.32	-1.28775	Down	0.809817	K01251|1|0.0|912|ath:AT3G23810|adenosylhomocysteinase [EC:3.3.1.1]	GO:0016020//membrane;GO:0043231//intracellular membrane-bounded organelle	GO:0016802	GO:0044237//cellular metabolic process	gi|685263768|ref|XP_009106322.1|/0/PREDICTED: adenosylhomocysteinase 2 [Brassica rapa]	AT3G23810.1 S-adenosyl-l-homocysteine (SAH) hydrolase 2
Bra019349	963	154.82	63.365	-1.28883	Down	0.804139	-	GO:0009534//chloroplast thylakoid	-	GO:0009767//photosynthetic electron transport chain	gi|685292725|ref|XP_009137291.1|/0/PREDICTED: PGR5-like protein 1A, chloroplastic isoform X1 [Brassica rapa]	AT4G22890.2 PGR5-LIKE A
Bra008824	657	216.29	88.345	-1.29175	Down	0.807421	K02864|1|2e-108|389|aly:ARALYDRAFT_488173|large subunit ribosomal protein L10	GO:0030529//ribonucleoprotein complex;GO:0009536//plastid	GO:0003723//RNA binding	GO:0010467//gene expression;GO:0022613//ribonucleoprotein complex biogenesis	gi|674963404|emb|CDX69636.1|/3.50656e-118/BnaA10g19850D [Brassica napus]	AT5G13510.1 Ribosomal protein L10 family protein
Bra033029	582	1045.99	424.035	-1.30261	Down	0.815183	K02935|1|1e-53|207|aly:ARALYDRAFT_484572|large subunit ribosomal protein L7/L12	GO:0000315//organellar large ribosomal subunit;GO:0009532//plastid stroma;GO:0009534//chloroplast thylakoid	GO:0005488//binding;GO:0005198//structural molecule activity	GO:0006952//defense response;GO:0010467//gene expression	gi|685276871|ref|XP_009129390.1|/1.50885e-58/PREDICTED: 50S ribosomal protein L12-1, chloroplastic [Brassica rapa]	AT3G27830.1 ribosomal protein L12-A
Bra011985	1758	314.655	127.545	-1.30276	Down	0.811294	K04077|1|1e-149|528|bdi:100842360|chaperonin GroEL	GO:0009526//plastid envelope;GO:0005840//ribosome;GO:0009532//plastid stroma;GO:0005576//extracellular region	GO:0005515//protein binding;GO:0032559	GO:0006457//protein folding;GO:0007275//multicellular organismal development;GO:0009657//plastid organization	gi|685331649|ref|XP_009103638.1|/0/PREDICTED: ruBisCO large subunit-binding protein subunit alpha, chloroplastic-like [Brassica rapa]	AT2G28000.1 chaperonin-60alpha
Bra012052	1566	166.89	67.605	-1.3037	Down	0.806092	K14638|1|6e-101|366|sbi:SORBI_01g009890|solute carrier family 15 (peptide/histidine transporter), member 3/4	GO:0031224//intrinsic component of membrane	-	GO:0006950//response to stress;GO:0015833//peptide transport;GO:0009719	gi|674887384|emb|CDY45207.1|/0/BnaA07g12830D, partial [Brassica napus]	AT2G26690.1 Major facilitator superfamily protein
Bra000785	984	164.555	66.6	-1.30498	Down	0.805911	-	GO:0009526//plastid envelope;GO:0009534//chloroplast thylakoid;GO:0009570//chloroplast stroma;GO:0044436	GO:0005488//binding	GO:0009767//photosynthetic electron transport chain;GO:0009725//response to hormone;GO:0006950//response to stress	gi|62900701|sp|Q94FZ9.1|PAP1_BRACM/8.34756e-168/RecName: Full=Plastid lipid-associated protein 1, chloroplastic; Flags: Precursor [Brassica rapa]	AT4G04020.1 fibrillin
Bra035535	381	1860.35	751.785	-1.30718	Down	0.816677	-	GO:0009534//chloroplast thylakoid	-	-	gi|674883062|emb|CDY49361.1|/1.42778e-35/BnaA08g29910D [Brassica napus]	AT2G06520.1 photosystem II subunit X
Bra031870	252	348.075	140.545	-1.30837	Down	0.812672	K02904|1|4e-22|100|ath:AT5G65220|large subunit ribosomal protein L29	GO:0009526//plastid envelope;GO:0043232;GO:0009532//plastid stroma;GO:0030529//ribonucleoprotein complex	GO:0005198//structural molecule activity	GO:0010467//gene expression;GO:0022613//ribonucleoprotein complex biogenesis	gi|674894994|emb|CDY37812.1|/4.14372e-22/BnaAnng04730D [Brassica napus]	AT5G65220.1 Ribosomal L29 family protein
Bra015897	588	204.67	82.51	-1.31066	Down	0.808783	-	GO:0009534//chloroplast thylakoid	-	-	gi|685338120|ref|XP_009106130.1|/1.2272e-62/PREDICTED: uncharacterized protein LOC103831934 [Brassica rapa]	AT1G74730.1 Protein of unknown function (DUF1118)
Bra013113	1575	107.865	43.44	-1.31213	Down	0.8013	-	-	-	-	gi|685290604|ref|XP_009136265.1|/0/PREDICTED: uncharacterized protein LOC103860415 [Brassica rapa]	AT2G15020.1 unknown protein; BEST Arabidopsis thaliana protein match is: unknown protein (TAIR:AT5G64190.1); Has 72 Blast hits to 72 proteins in 10 species: Archae - 0; Bacteria - 0; Metazoa - 0; Fungi - 0; Plants - 72; Viruses - 0; Other Eukaryotes - 0 (source: NCBI BLink).
Bra035529	1287	508.715	204.175	-1.31705	Down	0.815479	K01915|1|0.0|827|aly:ARALYDRAFT_493621|glutamine synthetase [EC:6.3.1.2]	GO:0005840//ribosome;GO:0009532//plastid stroma;GO:0009526//plastid envelope;GO:0009534//chloroplast thylakoid;GO:0005576//extracellular region	GO:0016211;GO:0032559	GO:0010038//response to metal ion;GO:0006541//glutamine metabolic process;GO:0006970//response to osmotic stress;GO:0006536//glutamate metabolic process;GO:0032502//developmental process	gi|685343110|ref|XP_009108017.1|/0/PREDICTED: glutamine synthetase, chloroplastic-like [Brassica rapa]	AT5G35630.3 glutamine synthetase 2
Bra015187	816	907.18	364.08	-1.31713	Down	0.816923	K07466|1|4e-63|239|aly:ARALYDRAFT_899421|replication factor A1	GO:0043231//intracellular membrane-bounded organelle;GO:0000785//chromatin	GO:0003676//nucleic acid binding	GO:0007276//gamete generation;GO:0006310//DNA recombination;GO:0048229//gametophyte development;GO:0007127//meiosis I	gi|685328237|ref|XP_009102340.1|/2.95421e-82/PREDICTED: replication protein A 70 kDa DNA-binding subunit A [Brassica rapa]	AT2G06510.1 replication protein A 1A
Bra017055	1332	9572.44	3836.08	-1.31925	Down	0.818629	K03064|1|2e-06|52.4|smo:SELMODRAFT_157152|26S proteasome regulatory subunit T4	GO:0030312//external encapsulating structure;GO:0009526//plastid envelope;GO:0009534//chloroplast thylakoid;GO:0009570//chloroplast stroma;GO:0005576//extracellular region	GO:0008047//enzyme activator activity;GO:0032559	GO:0009314//response to radiation;GO:0006952//defense response;GO:0019222//regulation of metabolic process;GO:0009719;GO:0010260//organ senescence	gi|685302246|ref|XP_009141833.1|/0/PREDICTED: LOW QUALITY PROTEIN: ribulose bisphosphate carboxylase/oxygenase activase, chloroplastic-like [Brassica rapa]	AT2G39730.2 rubisco activase
Bra040406	831	121.985	48.82	-1.32116	Down	0.804483	K01807|1|8e-132|467|aly:ARALYDRAFT_896526|ribose 5-phosphate isomerase A [EC:5.3.1.6]	-	GO:0016861//intramolecular oxidoreductase activity, interconverting aldoses and ketoses	GO:0006098//pentose-phosphate shunt	gi|674881561|emb|CDY50757.1|/3.26625e-142/BnaAnng10640D [Brassica napus]	AT3G04790.1 Ribose 5-phosphate isomerase, type A protein
Bra014720	1185	163.485	65.355	-1.32279	Down	0.80793	K01100|1|0.0|708|ath:AT3G55800|sedoheptulose-bisphosphatase [EC:3.1.3.37]	GO:0009532//plastid stroma;GO:0009526//plastid envelope;GO:0005576//extracellular region	GO:0005488//binding;GO:0019203//carbohydrate phosphatase activity	GO:0006952//defense response;GO:0005982//starch metabolic process;GO:0005985//sucrose metabolic process;GO:0015977//carbon fixation	gi|685296600|ref|XP_009139137.1|/0/PREDICTED: sedoheptulose-1,7-bisphosphatase, chloroplastic-like isoform X3 [Brassica rapa]	AT3G55800.1 sedoheptulose-bisphosphatase
Bra008222	297	97.38	38.875	-1.32478	Down	0.801283	-	GO:0005618//cell wall	GO:0005488//binding	GO:0009725//response to hormone;GO:0000902//cell morphogenesis	gi|674888636|emb|CDY44046.1|/7.64417e-39/BnaA08g15600D [Brassica napus]	AT1G75750.1 GAST1 protein homolog 1
Bra021853	429	300.59	119.91	-1.32585	Down	0.814116	-	GO:0030529//ribonucleoprotein complex;GO:0009536//plastid	GO:0005198//structural molecule activity	GO:0010467//gene expression	gi|685301241|ref|XP_009141317.1|/6.4073e-77/PREDICTED: 50S ribosomal protein L28, chloroplastic [Brassica rapa]	AT2G33450.1 Ribosomal L28 family
Bra026314	681	131.565	52.45	-1.32676	Down	0.806633	-	GO:0009534//chloroplast thylakoid	-	GO:0032502//developmental process	gi|685261131|ref|XP_009143867.1|/1.39535e-109/PREDICTED: rhodanese-like domain-containing protein 14, chloroplastic [Brassica rapa]	AT4G27700.1 Rhodanese/Cell cycle control phosphatase superfamily protein
Bra031785	1227	354.055	140.89	-1.3294	Down	0.815216	K00605|1|0.0|811|aly:ARALYDRAFT_471331|aminomethyltransferase [EC:2.1.2.10]	GO:0005840//ribosome;GO:0009526//plastid envelope;GO:0005576//extracellular region	GO:0016769//transferase activity, transferring nitrogenous groups;GO:0008168//methyltransferase activity	GO:0010038//response to metal ion;GO:0006544//glycine metabolic process	gi|685368514|ref|XP_009118169.1|/0/PREDICTED: aminomethyltransferase, mitochondrial [Brassica rapa]	AT1G11860.3 Glycine cleavage T-protein family
Bra009998	1320	222.275	88.445	-1.32949	Down	0.811885	-	GO:0009532//plastid stroma	-	-	gi|685322969|ref|XP_009151251.1|/0/PREDICTED: rubisco accumulation factor 1, chloroplastic [Brassica rapa]	AT5G28500.1 unknown protein; FUNCTIONS IN: molecular_function unknown; INVOLVED IN: biological_process unknown; LOCATED IN: chloroplast stroma, chloroplast; EXPRESSED IN: 23 plant structures; EXPRESSED DURING: 13 growth stages; BEST Arabidopsis thaliana protein match is: unknown protein (TAIR:AT3G04550.1); Has 109 Blast hits to 109 proteins in 49 species: Archae - 0; Bacteria - 67; Metazoa - 0; F…
Bra005134	360	463.98	184.325	-1.33181	Down	0.816151	-	GO:0009536//plastid	-	-	gi|685305384|ref|XP_009143418.1|/9.95137e-35/PREDICTED: 30S ribosomal protein S31, chloroplastic [Brassica rapa]	AT2G38140.1 plastid-specific ribosomal protein 4
Bra037701	651	113.77	45.155	-1.33316	Down	0.804697	K01802|1|2e-80|295|ath:AT2G43560|peptidylprolyl isomerase [EC:5.2.1.8];K09571|5|2e-15|80.5|pop:POPTR_824273|FK506-binding protein 4/5 [EC:5.2.1.8]	GO:0044436;GO:0009534//chloroplast thylakoid	GO:0016859//cis-trans isomerase activity;GO:0005527//macrolide binding	GO:0044267//cellular protein metabolic process	gi|674902560|emb|CDY30419.1|/2.69078e-93/BnaA04g25200D [Brassica napus]	AT2G43560.1 FKBP-like peptidyl-prolyl cis-trans isomerase family protein
Bra026099	777	2059.3	816.055	-1.33541	Down	0.820894	K08917|1|3e-119|425|aly:ARALYDRAFT_471781|light-harvesting complex II chlorophyll a/b binding protein 6	GO:0009526//plastid envelope;GO:0009523//photosystem II;GO:0009570//chloroplast stroma;GO:0009534//chloroplast thylakoid	-	GO:0009416//response to light stimulus;GO:0006091//generation of precursor metabolites and energy	gi|674897771|emb|CDY35042.1|/4.17991e-121/BnaA06g10520D [Brassica napus]	AT1G15820.1 light harvesting complex photosystem II subunit 6
Bra033195	3144	98.38	38.865	-1.33989	Down	0.804204	K00696|1|0.0|1827|aly:ARALYDRAFT_489859|sucrose-phosphate synthase [EC:2.4.1.14]	GO:0016020//membrane	GO:0035251//UDP-glucosyltransferase activity	GO:0005984//disaccharide metabolic process	gi|674891626|emb|CDY41124.1|/0/BnaA02g23460D [Brassica napus]	AT4G10120.2 Sucrose-phosphate synthase family protein
Bra033753	1425	827.535	326.55	-1.34152	Down	0.819516	K02358|1|0.0|763|aly:ARALYDRAFT_917130|elongation factor Tu	GO:0031981//nuclear lumen;GO:0009532//plastid stroma;GO:0043232;GO:0009526//plastid envelope;GO:0009534//chloroplast thylakoid;GO:0005576//extracellular region	GO:0017111//nucleoside-triphosphatase activity;GO:0008135//translation factor activity, nucleic acid binding;GO:0032561//guanyl ribonucleotide binding	GO:0006412//translation;GO:0009207	gi|685326619|ref|XP_009101694.1|/0/PREDICTED: elongation factor Tu, chloroplastic-like [Brassica rapa]	AT4G20360.1 RAB GTPase homolog E1B
Bra002177	1233	119.03	46.96	-1.34182	Down	0.80706	K03953|1|7e-08|56.6|rcu:RCOM_0541790|NADH dehydrogenase (ubiquinone) 1 alpha subcomplex 9 [EC:1.6.5.3 1.6.99.3];K00224|2|5e-06|50.4|aly:ARALYDRAFT_476671|[EC:1.3.1.-]	GO:0009536//plastid	GO:0016491//oxidoreductase activity	GO:0006779//porphyrin-containing compound biosynthetic process	gi|685375885|ref|XP_009120951.1|/0/PREDICTED: divinyl chlorophyllide a 8-vinyl-reductase, chloroplastic [Brassica rapa]	AT5G18660.1 NAD(P)-binding Rossmann-fold superfamily protein
Bra003499	390	472.535	186.115	-1.34423	Down	0.817924	-	GO:0009532//plastid stroma	GO:0005488//binding	GO:0009314//response to radiation;GO:0018149//peptide cross-linking;GO:0015977//carbon fixation;GO:0034285;GO:0009890//negative regulation of biosynthetic process	gi|685333555|ref|XP_009104385.1|/2.19618e-69/PREDICTED: calvin cycle protein CP12-2, chloroplastic-like [Brassica rapa]	AT3G62410.1 CP12 domain-containing protein 2
Bra027704	627	126.985	49.92	-1.34697	Down	0.809932	-	GO:0009534//chloroplast thylakoid;GO:0030529//ribonucleoprotein complex	GO:0005198//structural molecule activity	GO:0010467//gene expression;GO:0022613//ribonucleoprotein complex biogenesis	gi|685355788|ref|XP_009112871.1|/2.33349e-91/PREDICTED: 30S ribosomal protein S6 alpha, chloroplastic-like [Brassica rapa]	AT1G64510.1 Translation elongation factor EF1B/ribosomal protein S6 family protein
Bra006903	756	118.615	46.62	-1.34727	Down	0.809046	K11294|1|3e-23|106|smo:SELMODRAFT_15428|nucleolin;K13126|3|2e-16|83.6|cre:CHLREDRAFT_116226|polyadenylate-binding protein	GO:0009526//plastid envelope;GO:0009532//plastid stroma;GO:0009534//chloroplast thylakoid;GO:0032991//macromolecular complex	GO:0003676//nucleic acid binding	-	gi|685363283|ref|XP_009115920.1|/3.94396e-132/PREDICTED: 30S ribosomal protein 2, chloroplastic-like [Brassica rapa]	AT3G52150.2 RNA-binding (RRM/RBD/RNP motifs) family protein
Bra006907	756	118.615	46.62	-1.34727	Down	0.809046	K11294|1|3e-23|106|smo:SELMODRAFT_15428|nucleolin;K13126|3|2e-16|83.6|cre:CHLREDRAFT_116226|polyadenylate-binding protein	GO:0009526//plastid envelope;GO:0009532//plastid stroma;GO:0009534//chloroplast thylakoid;GO:0032991//macromolecular complex	GO:0003676//nucleic acid binding	-	gi|685363283|ref|XP_009115920.1|/3.94396e-132/PREDICTED: 30S ribosomal protein 2, chloroplastic-like [Brassica rapa]	AT3G52150.2 RNA-binding (RRM/RBD/RNP motifs) family protein
Bra033350	297	853.46	334.99	-1.34921	Down	0.821616	-	-	-	GO:0009414//response to water deprivation;GO:0007275//multicellular organismal development;GO:0006979//response to oxidative stress	gi|674943529|emb|CDX89941.1|/6.96775e-42/BnaA10g01410D [Brassica napus]	AT1G02820.1 Late embryogenesis abundant 3 (LEA3) family protein
Bra038011	486	823.09	322.055	-1.35374	Down	0.821534	K08905|1|2e-55|212|ath:AT1G55670|photosystem I subunit V	GO:0031224//intrinsic component of membrane;GO:0009522//photosystem I;GO:0009526//plastid envelope;GO:0009534//chloroplast thylakoid	-	GO:0009767//photosynthetic electron transport chain;GO:0031647//regulation of protein stability;GO:0042548//regulation of photosynthesis, light reaction;GO:0006740//NADPH regeneration	gi|674882347|emb|CDY50020.1|/1.07665e-58/BnaA06g00210D [Brassica napus]	AT1G55670.1 photosystem I subunit G
Bra002221	1551	92.905	36.3	-1.35579	Down	0.806617	K00975|1|0.0|996|ath:AT5G19220|glucose-1-phosphate adenylyltransferase [EC:2.7.7.27]	GO:0009526//plastid envelope;GO:0009532//plastid stroma	GO:0070566//adenylyltransferase activity	GO:0005977//glycogen metabolic process	gi|674941032|emb|CDX92546.1|/0/BnaA10g15850D [Brassica napus]	AT5G19220.1 ADP glucose pyrophosphorylase large subunit 1
Bra014908	654	992.44	387.17	-1.35801	Down	0.823011	K02694|1|2e-105|379|ath:AT1G31330|photosystem I subunit III	GO:0009526//plastid envelope;GO:0009570//chloroplast stroma;GO:0009534//chloroplast thylakoid;GO:0009522//photosystem I	-	GO:0044237//cellular metabolic process	gi|685329130|ref|XP_009102665.1|/9.37081e-115/PREDICTED: photosystem I reaction center subunit III, chloroplastic-like [Brassica rapa]	AT1G31330.1 photosystem I subunit F
Bra022065	897	267.905	104.415	-1.35939	Down	0.818268	K15109|1|3e-154|541|ath:AT5G46800|solute carrier family 25 (mitochondrial carnitine/acylcarnitine transporter), member 20/29	GO:0019866//organelle inner membrane;GO:0031224//intrinsic component of membrane;GO:0009536//plastid	-	GO:0046907//intracellular transport;GO:0006865//amino acid transport	gi|674945656|emb|CDX87675.1|/1.56502e-160/BnaC02g32740D [Brassica napus]	AT5G46800.1 Mitochondrial substrate carrier family protein
Bra024367	510	497.495	193.685	-1.36097	Down	0.821354	K02904|1|2e-56|215|aly:ARALYDRAFT_919853|large subunit ribosomal protein L29	GO:0009526//plastid envelope;GO:0043232;GO:0009532//plastid stroma;GO:0030529//ribonucleoprotein complex	GO:0005198//structural molecule activity	GO:0010467//gene expression;GO:0022613//ribonucleoprotein complex biogenesis	gi|685321208|ref|XP_009150605.1|/3.33523e-73/PREDICTED: 50S ribosomal protein L29, chloroplastic-like [Brassica rapa]	AT5G65220.1 Ribosomal L29 family protein
Bra023270	501	794.365	309.16	-1.36145	Down	0.822601	K02437|1|2e-81|298|ath:AT1G32470|glycine cleavage system H protein	GO:0043234//protein complex;GO:0009536//plastid	-	GO:0006546//glycine catabolic process	gi|674939694|emb|CDX93831.1|/2.23088e-91/BnaA09g24310D [Brassica napus]	AT1G32470.1 Single hybrid motif superfamily protein
Bra032345	300	2727.23	1056.94	-1.36754	Down	0.825013	K08912|1|2e-48|187|ath:AT2G34430|light-harvesting complex II chlorophyll a/b binding protein 1	GO:0009521;GO:0009526//plastid envelope;GO:0031224//intrinsic component of membrane;GO:0009570//chloroplast stroma;GO:0009534//chloroplast thylakoid	GO:0046906//tetrapyrrole binding;GO:0043169//cation binding	GO:0006464//cellular protein modification process;GO:0006091//generation of precursor metabolites and energy	gi|685329449|ref|XP_009102801.1|/6.27346e-48/PREDICTED: chlorophyll a-b binding protein 1, chloroplastic-like [Brassica rapa]	AT2G34430.1 light-harvesting chlorophyll-protein complex II subunit B1
Bra034704	579	217.705	84.265	-1.36937	Down	0.817481	K02946|1|3e-76|282|ath:AT3G13120|small subunit ribosomal protein S10	GO:0030529//ribonucleoprotein complex;GO:0009536//plastid	GO:0003723//RNA binding;GO:0005198//structural molecule activity	GO:0010467//gene expression	gi|685311972|ref|XP_009146549.1|/2.39147e-89/PREDICTED: 30S ribosomal protein S10, chloroplastic-like [Brassica rapa]	AT3G13120.2 Ribosomal protein S10p/S20e family protein
Bra016650	774	164.09	63.51	-1.36943	Down	0.814855	K08917|1|7e-120|427|aly:ARALYDRAFT_471781|light-harvesting complex II chlorophyll a/b binding protein 6	GO:0009526//plastid envelope;GO:0009523//photosystem II;GO:0009570//chloroplast stroma;GO:0009534//chloroplast thylakoid	-	GO:0009416//response to light stimulus;GO:0006091//generation of precursor metabolites and energy	gi|685349810|ref|XP_009110471.1|/2.02163e-125/PREDICTED: chlorophyll a-b binding protein CP24 10B, chloroplastic-like [Brassica rapa]	AT1G15820.1 light harvesting complex photosystem II subunit 6
Bra038418	642	307.04	118.795	-1.36995	Down	0.820041	K02694|1|3e-95|345|aly:ARALYDRAFT_473640|photosystem I subunit III	GO:0009526//plastid envelope;GO:0009570//chloroplast stroma;GO:0009534//chloroplast thylakoid;GO:0009522//photosystem I	-	GO:0044237//cellular metabolic process	gi|685343418|ref|XP_009108124.1|/7.05741e-105/PREDICTED: photosystem I reaction center subunit III, chloroplastic-like [Brassica rapa]	AT1G31330.1 photosystem I subunit F
Bra033415	1203	120.93	46.64	-1.37453	Down	0.81131	K00218|1|0.0|689|aly:ARALYDRAFT_470335|protochlorophyllide reductase [EC:1.3.1.33]	GO:0009526//plastid envelope;GO:0009534//chloroplast thylakoid	GO:0016628//oxidoreductase activity, acting on the CH-CH group of donors, NAD or NADP as acceptor;GO:0016651//oxidoreductase activity, acting on NAD(P)H	GO:0006779//porphyrin-containing compound biosynthetic process	gi|685371726|ref|XP_009119523.1|/0/PREDICTED: protochlorophyllide reductase C, chloroplastic [Brassica rapa]	AT1G03630.1 protochlorophyllide oxidoreductase C
Bra028186	408	93.73	36.14	-1.37491	Down	0.807618	-	GO:0009526//plastid envelope;GO:0042579//microbody;GO:0009570//chloroplast stroma;GO:0030529//ribonucleoprotein complex;GO:0005576//extracellular region	GO:0048037//cofactor binding	GO:0006952//defense response;GO:0048511//rhythmic process;GO:0042254//ribosome biogenesis;GO:0009657//plastid organization;GO:0008152//metabolic process	gi|674938358|emb|CDX94984.1|/1.04982e-69/BnaC05g06870D [Brassica napus]	AT1G09340.1 chloroplast RNA binding
Bra027109	447	3788.61	1454.21	-1.38143	Down	0.826342	K02639|1|5e-58|220|aly:ARALYDRAFT_893437|ferredoxin	GO:0009532//plastid stroma	GO:0043169//cation binding;GO:0051536//iron-sulfur cluster binding	GO:0009314//response to radiation;GO:0022900//electron transport chain	gi|674920282|emb|CDY12877.1|/2.57671e-63/BnaA09g13970D [Brassica napus]	AT1G60950.1 2Fe-2S ferredoxin-like superfamily protein
Bra030858	2070	84.77	32.315	-1.39135	Down	0.808012	K04077|1|0.0|919|bdi:100842360|chaperonin GroEL	GO:0005840//ribosome;GO:0031981//nuclear lumen;GO:0009532//plastid stroma;GO:0009526//plastid envelope;GO:0005576//extracellular region;GO:0016020//membrane	GO:0005515//protein binding;GO:0032559	GO:0051084//'de novo' posttranslational protein folding;GO:0009814//defense response, incompatible interaction	gi|674930802|emb|CDY02438.1|/0/BnaA08g00450D [Brassica napus]	AT1G55490.2 chaperonin 60 beta
Bra031893	504	91.685	34.945	-1.3916	Down	0.809472	-	GO:0009534//chloroplast thylakoid	-	-	gi|674901623|emb|CDY31294.1|/2.31265e-41/BnaA02g34470D [Brassica napus]	AT2G29180.1 unknown protein; FUNCTIONS IN: molecular_function unknown; INVOLVED IN: biological_process unknown; LOCATED IN: chloroplast thylakoid membrane; EXPRESSED IN: 23 plant structures; EXPRESSED DURING: 13 growth stages; Has 34 Blast hits to 33 proteins in 16 species: Archae - 0; Bacteria - 0; Metazoa - 0; Fungi - 0; Plants - 33; Viruses - 0; Other Eukaryotes - 1 (source: NCBI BLink).
Bra001470	1455	506.155	192.545	-1.39438	Down	0.824291	K00927|1|0.0|770|ath:AT3G12780|phosphoglycerate kinase [EC:2.7.2.3]	GO:0030312//external encapsulating structure;GO:0009532//plastid stroma;GO:0009526//plastid envelope;GO:0005576//extracellular region	GO:0016301//kinase activity	GO:0006007//glucose catabolic process;GO:0010038//response to metal ion;GO:0006796//phosphate-containing compound metabolic process;GO:0006950//response to stress	gi|685288591|ref|XP_009135249.1|/0/PREDICTED: phosphoglycerate kinase 1, chloroplastic [Brassica rapa]	AT3G12780.1 phosphoglycerate kinase 1
Bra007750	372	1416	538.455	-1.39492	Down	0.826539	-	GO:0043234//protein complex;GO:0009534//chloroplast thylakoid	-	GO:0008152//metabolic process	gi|674921821|emb|CDY11479.1|/9.43231e-59/BnaA09g40450D [Brassica napus]	AT2G26500.1 cytochrome b6f complex subunit (petM), putative
Bra014755	690	154.795	58.795	-1.39659	Down	0.817267	K02717|1|3e-102|368|aly:ARALYDRAFT_485956|photosystem II oxygen-evolving enhancer protein 2	GO:0009523//photosystem II;GO:0009534//chloroplast thylakoid	GO:0046872//metal ion binding	GO:0044237//cellular metabolic process	gi|685296683|ref|XP_009139174.1|/6.32621e-120/PREDICTED: psbP-like protein 1, chloroplastic isoform X1 [Brassica rapa]	AT3G55330.1 PsbP-like protein 1
Bra030303	1173	4524.11	1713.71	-1.40051	Down	0.828082	K01623|1|0.0|749|aly:ARALYDRAFT_900547|fructose-bisphosphate aldolase, class I [EC:4.1.2.13]	GO:0005840//ribosome;GO:0009526//plastid envelope;GO:0009570//chloroplast stroma;GO:0005576//extracellular region;GO:0044436	GO:0016832//aldehyde-lyase activity	GO:0006007//glucose catabolic process;GO:0010038//response to metal ion;GO:0009725//response to hormone	gi|674917288|emb|CDY15898.1|/0/BnaA04g12130D [Brassica napus]	AT2G21330.1 fructose-bisphosphate aldolase 1
Bra035741	1098	125.905	47.675	-1.40103	Down	0.814839	K13420|1|5e-42|169|rcu:RCOM_0633880|LRR receptor-like serine/threonine-protein kinase FLS2 [EC:2.7.11.1]	GO:0005576//extracellular region;GO:0030312//external encapsulating structure;GO:0009536//plastid	-	GO:0023052//signaling	gi|674913554|emb|CDY19601.1|/0/BnaA05g20090D [Brassica napus]	AT3G20820.1 Leucine-rich repeat (LRR) family protein
Bra039844	1524	422.42	159.58	-1.4044	Down	0.824439	K00366|1|0.0|999|ath:AT2G15620|ferredoxin-nitrite reductase [EC:1.7.7.1]	GO:0009532//plastid stroma;GO:0005576//extracellular region	GO:0016662;GO:0051540;GO:0016664;GO:0005506//iron ion binding	GO:0010035//response to inorganic substance;GO:0008152//metabolic process	gi|685381331|ref|XP_009123250.1|/0/PREDICTED: ferredoxin--nitrite reductase, chloroplastic-like [Brassica rapa]	AT2G15620.1 nitrite reductase 1
Bra025219	1143	433.435	163.18	-1.40935	Down	0.825177	K05298|1|0.0|654|aly:ARALYDRAFT_484431|glyceraldehyde-3-phosphate dehydrogenase (NADP+) (phosphorylating) [EC:1.2.1.13]	GO:0009532//plastid stroma;GO:0009526//plastid envelope;GO:0009534//chloroplast thylakoid;GO:0005576//extracellular region	GO:0016620//oxidoreductase activity, acting on the aldehyde or oxo group of donors, NAD or NADP as acceptor;GO:0000166//nucleotide binding	GO:0009314//response to radiation;GO:0019318//hexose metabolic process;GO:0015977//carbon fixation;GO:0034285;GO:0006950//response to stress	gi|674919555|emb|CDY13649.1|/0/BnaA06g32740D [Brassica napus]	AT3G26650.1 glyceraldehyde 3-phosphate dehydrogenase A subunit
Bra007446	771	535.445	201.47	-1.41017	Down	0.825965	-	-	GO:0005515//protein binding	GO:0006779//porphyrin-containing compound biosynthetic process;GO:0007165//signal transduction;GO:0044093	gi|685364881|ref|XP_009116599.1|/5.62597e-108/PREDICTED: tetrapyrrole-binding protein, chloroplastic [Brassica rapa]	AT3G59400.1 enzyme binding;tetrapyrrole binding
Bra037609	591	313.915	117.59	-1.41661	Down	0.825604	K02939|1|2e-73|272|aly:ARALYDRAFT_484888|large subunit ribosomal protein L9	GO:0000315//organellar large ribosomal subunit;GO:0009532//plastid stroma	GO:0003723//RNA binding;GO:0005198//structural molecule activity	GO:0010467//gene expression;GO:0022613//ribonucleoprotein complex biogenesis	gi|674912797|emb|CDY20339.1|/5.28631e-80/BnaC01g24010D [Brassica napus]	AT3G44890.1 ribosomal protein L9
Bra034927	1347	3226.19	1204.72	-1.42113	Down	0.830461	K05298|1|0.0|827|aly:ARALYDRAFT_473747|glyceraldehyde-3-phosphate dehydrogenase (NADP+) (phosphorylating) [EC:1.2.1.13]	GO:0009532//plastid stroma;GO:0009526//plastid envelope;GO:0009534//chloroplast thylakoid;GO:0005576//extracellular region	GO:0000166//nucleotide binding	GO:0009314//response to radiation;GO:0010038//response to metal ion;GO:0019318//hexose metabolic process;GO:0015977//carbon fixation;GO:0034285;GO:0006950//response to stress	gi|674897096|emb|CDY35800.1|/0/BnaA08g04610D [Brassica napus]	AT1G42970.1 glyceraldehyde-3-phosphate dehydrogenase B subunit
Bra007282	432	353.955	131.89	-1.42423	Down	0.82626	-	GO:0009579//thylakoid;GO:0044434	-	-	gi|674905788|emb|CDY27181.1|/4.85108e-46/BnaA09g36210D [Brassica napus]	AT3G56910.1 plastid-specific 50S ribosomal protein 5
Bra001653	480	683.49	253.91	-1.4286	Down	0.830084	-	-	-	GO:0006950//response to stress	gi|674851337|emb|CDY71596.1|/1.04833e-68/BnaAnng38080D [Brassica napus]	AT3G16660.1 Pollen Ole e 1 allergen and extensin family protein
Bra032984	555	175.03	64.96	-1.42998	Down	0.822486	-	GO:0030529//ribonucleoprotein complex;GO:0009536//plastid	GO:0005198//structural molecule activity	GO:0010467//gene expression;GO:0022613//ribonucleoprotein complex biogenesis	gi|685276991|ref|XP_009129445.1|/1.02618e-61/PREDICTED: uncharacterized protein LOC103854264 [Brassica rapa]	AT3G27160.1 Ribosomal protein S21 family protein
Bra012203	1104	332.845	123.415	-1.43133	Down	0.827639	K02641|1|7e-177|617|aly:ARALYDRAFT_472228|ferredoxin--NADP+ reductase [EC:1.18.1.2]	GO:0009532//plastid stroma;GO:0009534//chloroplast thylakoid;GO:0034357;GO:0005576//extracellular region	GO:0008187//poly-pyrimidine tract binding;GO:0000166//nucleotide binding;GO:0050662//coenzyme binding;GO:0008937//ferredoxin-NAD(P) reductase activity	GO:0006091//generation of precursor metabolites and energy;GO:0050832//defense response to fungus	gi|685330949|ref|XP_009103366.1|/0/PREDICTED: ferredoxin--NADP reductase, leaf isozyme 2, chloroplastic [Brassica rapa]	AT1G20020.1 ferredoxin-NADP(+)-oxidoreductase 2
Bra037164	999	1325.91	490.57	-1.43445	Down	0.831348	K02716|1|0.0|656|aly:ARALYDRAFT_920071|photosystem II oxygen-evolving enhancer protein 1	GO:0009523//photosystem II;GO:0009534//chloroplast thylakoid;GO:0009570//chloroplast stroma;GO:0005576//extracellular region	GO:0008187//poly-pyrimidine tract binding;GO:0046872//metal ion binding;GO:0016491//oxidoreductase activity	GO:0006952//defense response;GO:0006470//protein dephosphorylation;GO:0009767//photosynthetic electron transport chain;GO:0042548//regulation of photosynthesis, light reaction	gi|674914474|emb|CDY18611.1|/0/BnaA09g07840D [Brassica napus]	AT5G66570.1 PS II oxygen-evolving complex 1
Bra013314	1272	445.9	164.275	-1.44061	Down	0.829756	K03405|1|0.0|669|aly:ARALYDRAFT_914833|magnesium chelatase subunit I [EC:6.6.1.1]	GO:0043234//protein complex;GO:0030312//external encapsulating structure;GO:0009532//plastid stroma	GO:0017111//nucleoside-triphosphatase activity;GO:0051003;GO:0032559	GO:0009207;GO:0006779//porphyrin-containing compound biosynthetic process	gi|685258573|ref|XP_009131778.1|/0/PREDICTED: magnesium-chelatase subunit ChlI-1, chloroplastic [Brassica rapa]	AT4G18480.1 P-loop containing nucleoside triphosphate hydrolases superfamily protein
Bra039144	1593	163.23	60.095	-1.44159	Down	0.822913	K01739|1|0.0|900|aly:ARALYDRAFT_477417|cystathionine gamma-synthase [EC:2.5.1.48]	GO:0009536//plastid	GO:0016765//transferase activity, transferring alkyl or aryl (other than methyl) groups;GO:0048037//cofactor binding	GO:0019752//carboxylic acid metabolic process	gi|685313601|ref|XP_009147397.1|/0/PREDICTED: cystathionine gamma-synthase, chloroplastic-like [Brassica rapa]	AT3G01120.1 Pyridoxal phosphate (PLP)-dependent transferases superfamily protein
Bra005240	384	163.53	60.06	-1.44508	Down	0.823897	-	GO:0009526//plastid envelope	-	-	gi|685305646|ref|XP_009143553.1|/2.19778e-61/PREDICTED: uncharacterized protein LOC103867251 [Brassica rapa]	AT2G36835.1 unknown protein; FUNCTIONS IN: molecular_function unknown; INVOLVED IN: biological_process unknown; LOCATED IN: chloroplast envelope; EXPRESSED IN: 22 plant structures; EXPRESSED DURING: 13 growth stages; Has 26 Blast hits to 26 proteins in 11 species: Archae - 0; Bacteria - 0; Metazoa - 0; Fungi - 0; Plants - 26; Viruses - 0; Other Eukaryotes - 0 (source: NCBI BLink).
Bra011839	603	152.115	55.71	-1.44915	Down	0.823323	K01802|1|1e-22|104|osa:4341766|peptidylprolyl isomerase [EC:5.2.1.8];K09569|4|3e-11|66.6|vcn:VOLCADRAFT_47514|FK506-binding protein 2 [EC:5.2.1.8]	GO:0009534//chloroplast thylakoid	GO:0016859//cis-trans isomerase activity;GO:0005527//macrolide binding	GO:0044267//cellular protein metabolic process	gi|674890792|emb|CDY42000.1|/6.96383e-90/BnaA01g05720D [Brassica napus]	AT4G39710.1 FK506-binding protein 16-2
Bra033982	603	1019.35	371.84	-1.45489	Down	0.832907	K02723|1|3e-47|185|aly:ARALYDRAFT_475878|photosystem II PsbY protein	GO:0034357;GO:0009534//chloroplast thylakoid;GO:0044425//membrane part	-	-	gi|685273052|ref|XP_009127575.1|/1.20616e-65/PREDICTED: photosystem II core complex proteins psbY, chloroplastic-like [Brassica rapa]	AT1G67740.1 photosystem II BY
Bra039342	1443	790.99	288.505	-1.45506	Down	0.833596	K00927|1|0.0|799|ath:AT3G12780|phosphoglycerate kinase [EC:2.7.2.3]	GO:0030312//external encapsulating structure;GO:0009532//plastid stroma;GO:0009526//plastid envelope;GO:0005576//extracellular region	GO:0016301//kinase activity	GO:0006007//glucose catabolic process;GO:0010038//response to metal ion;GO:0006796//phosphate-containing compound metabolic process;GO:0006950//response to stress	gi|685385409|ref|XP_009124670.1|/0/PREDICTED: phosphoglycerate kinase 1, chloroplastic-like [Brassica rapa]	AT3G12780.1 phosphoglycerate kinase 1
Bra018565	1137	964.085	350.045	-1.46162	Down	0.833941	K00224|1|1e-05|49.3|ath:AT1G75280|[EC:1.3.1.-]	GO:0009526//plastid envelope;GO:0042579//microbody;GO:0009570//chloroplast stroma;GO:0030529//ribonucleoprotein complex;GO:0005576//extracellular region	GO:0048037//cofactor binding	GO:0006952//defense response;GO:0048511//rhythmic process;GO:0042254//ribosome biogenesis;GO:0009657//plastid organization;GO:0008152//metabolic process	gi|674939829|emb|CDX93509.1|/0/BnaA06g05390D [Brassica napus]	AT1G09340.1 chloroplast RNA binding
Bra006425	342	559.465	203.11	-1.46179	Down	0.83271	-	GO:0009536//plastid	GO:0003723//RNA binding	GO:0010467//gene expression	gi|685281421|ref|XP_009131614.1|/1.57843e-30/PREDICTED: 50S ribosomal protein 6, chloroplastic [Brassica rapa]	AT5G17870.1 plastid-specific 50S ribosomal protein 6
Bra040136	1332	145.515	52.815	-1.46215	Down	0.823946	-	GO:0009532//plastid stroma	-	-	gi|674911943|emb|CDY21125.1|/0/BnaA01g33560D [Brassica napus]	AT3G04550.1 unknown protein; INVOLVED IN: biological_process unknown; LOCATED IN: chloroplast stroma, chloroplast; EXPRESSED IN: 22 plant structures; EXPRESSED DURING: 13 growth stages; BEST Arabidopsis thaliana protein match is: unknown protein (TAIR:AT5G28500.1); Has 110 Blast hits to 110 proteins in 51 species: Archae - 0; Bacteria - 67; Metazoa - 1; Fungi - 0; Plants - 41; Viruses - 0; Other …
Bra036724	1575	122.475	44.215	-1.46988	Down	0.822732	K01733|1|0.0|902|ath:AT4G29840|threonine synthase [EC:4.2.3.1]	GO:0009536//plastid	GO:0016838//carbon-oxygen lyase activity, acting on phosphates;GO:0048037//cofactor binding	GO:0006566//threonine metabolic process	gi|685355101|ref|XP_009112602.1|/0/PREDICTED: threonine synthase 1, chloroplastic-like [Brassica rapa]	AT4G29840.1 Pyridoxal-5&apos;-phosphate-dependent enzyme family protein
Bra031329	1023	1022.57	367.15	-1.47776	Down	0.835975	-	GO:0044464	GO:0005488//binding	GO:0010876//lipid localization	gi|685309633|ref|XP_009145429.1|/3.95102e-32/PREDICTED: 36.4 kDa proline-rich protein-like [Brassica rapa]	AT3G22120.1 cell wall-plasma membrane linker protein
Bra007055	627	387.485	138.62	-1.48301	Down	0.833218	K02879|1|6e-80|294|ath:AT3G54210|large subunit ribosomal protein L17	GO:0030529//ribonucleoprotein complex;GO:0009536//plastid	GO:0005198//structural molecule activity	GO:0010467//gene expression	gi|674955490|emb|CDX78218.1|/3.52228e-81/BnaA09g34130D [Brassica napus]	AT3G54210.1 Ribosomal protein L17 family protein
Bra014437	861	87.09	31.115	-1.4849	Down	0.818876	K09872|1|3e-156|548|aly:ARALYDRAFT_912203|aquaporin PIP	GO:0031225//anchored component of membrane;GO:0009536//plastid	GO:0005372//water transmembrane transporter activity	GO:0006970//response to osmotic stress;GO:0042044//fluid transport	gi|685295821|ref|XP_009138772.1|/2.83005e-165/PREDICTED: aquaporin PIP1-1 [Brassica rapa]	AT2G45960.1 plasma membrane intrinsic protein 1B
Bra033802	1536	201.86	72.03	-1.48669	Down	0.830084	-	GO:0009526//plastid envelope;GO:0009534//chloroplast thylakoid;GO:0000229	-	-	gi|685262405|ref|XP_009150492.1|/0/PREDICTED: protein TIC 62, chloroplastic [Brassica rapa]	AT3G46780.1 plastid transcriptionally active 16
Bra015532	438	88.11	31.435	-1.48693	Down	0.820156	K03676|1|7e-19|90.5|bdi:100821530|glutaredoxin 3	GO:0044464	GO:0015036//disulfide oxidoreductase activity	GO:0019725//cellular homeostasis	gi|685370534|ref|XP_009119027.1|/1.46206e-40/PREDICTED: monothiol glutaredoxin-S11 [Brassica rapa]	AT1G06830.1 Glutaredoxin family protein
Bra023418	324	130.115	46.355	-1.48899	Down	0.825702	K02864|1|8e-55|209|aly:ARALYDRAFT_488173|large subunit ribosomal protein L10	GO:0030529//ribonucleoprotein complex	-	GO:0010467//gene expression;GO:0022613//ribonucleoprotein complex biogenesis	gi|674947862|emb|CDX85644.1|/1.29593e-57/BnaA02g01690D [Brassica napus]	AT5G13510.1 Ribosomal protein L10 family protein
Bra017596	624	135.32	48.185	-1.48972	Down	0.826047	K01802|1|2e-105|379|ath:AT5G45680|peptidylprolyl isomerase [EC:5.2.1.8];K14826|4|4e-23|105|pop:POPTR_422620|FK506-binding nuclear protein [EC:5.2.1.8];K09569|5|5e-21|99.0|bdi:100837933|FK506-binding protein 2 [EC:5.2.1.8]	GO:0044436;GO:0009534//chloroplast thylakoid	GO:0016859//cis-trans isomerase activity;GO:0005527//macrolide binding	GO:0044267//cellular protein metabolic process	gi|674920078|emb|CDY13042.1|/1.90574e-115/BnaA09g17750D [Brassica napus]	AT5G45680.1 FK506-binding protein 13
Bra010384	5283	70.87	25.195	-1.49204	Down	0.815872	K03255|1|2e-101|370|ppp:PHYPADRAFT_203627|protein TIF31	-	GO:0005488//binding	GO:0009725//response to hormone	gi|685346057|ref|XP_009109111.1|/0/PREDICTED: clustered mitochondria protein homolog [Brassica rapa]	AT4G28080.1 Tetratricopeptide repeat (TPR)-like superfamily protein
Bra023492	540	71.95	25.57	-1.49254	Down	0.816151	-	GO:0009532//plastid stroma;GO:0009534//chloroplast thylakoid	GO:0043169//cation binding	-	gi|685270008|ref|XP_009126015.1|/3.40105e-70/PREDICTED: uncharacterized protein LOC103850955 [Brassica rapa]	AT5G14910.1 Heavy metal transport/detoxification superfamily protein
Bra031534	792	1420.14	503.735	-1.4953	Down	0.838207	K02717|1|7e-121|431|aly:ARALYDRAFT_470689|photosystem II oxygen-evolving enhancer protein 2	GO:0009532//plastid stroma;GO:0009526//plastid envelope;GO:0009534//chloroplast thylakoid;GO:0009523//photosystem II;GO:0005576//extracellular region	GO:0008187//poly-pyrimidine tract binding;GO:0046872//metal ion binding	GO:0006952//defense response;GO:0006091//generation of precursor metabolites and energy	gi|685369238|ref|XP_009118485.1|/7.36397e-129/PREDICTED: oxygen-evolving enhancer protein 2, chloroplastic isoform X1 [Brassica rapa]	AT1G06680.1 photosystem II subunit P-1
Bra032644	861	76.26	27.035	-1.4961	Down	0.818186	K09872|1|1e-160|563|ath:AT4G00430|aquaporin PIP	GO:0031224//intrinsic component of membrane	GO:0005372//water transmembrane transporter activity	GO:0006950//response to stress;GO:0006810//transport	gi|685370020|ref|XP_009118823.1|/1.51408e-164/PREDICTED: aquaporin PIP1-3 [Brassica rapa]	AT4G00430.1 plasma membrane intrinsic protein 1;4
Bra001121	426	483.235	171.24	-1.49671	Down	0.835926	-	-	-	GO:0006952//defense response	gi|674959466|emb|CDX74171.1|/7.99927e-72/BnaA03g28760D [Brassica napus]	AT3G04720.1 pathogenesis-related 4
Bra023250	876	78.41	27.78	-1.49699	Down	0.818908	-	GO:0009570//chloroplast stroma	GO:0048037//cofactor binding	GO:0008152//metabolic process;GO:0006950//response to stress	gi|685360864|ref|XP_009114905.1|/4.54294e-166/PREDICTED: uncharacterized protein At1g32220, chloroplastic [Brassica rapa]	AT1G32220.1 NAD(P)-binding Rossmann-fold superfamily protein
Bra004027	483	61.015	21.545	-1.50181	Down	0.813066	-	GO:0009534//chloroplast thylakoid;GO:0030529//ribonucleoprotein complex	GO:0005198//structural molecule activity	GO:0010467//gene expression	gi|685335216|ref|XP_009105033.1|/2.65959e-79/PREDICTED: 30S ribosomal protein 3-1, chloroplastic-like [Brassica rapa]	AT1G68590.1 Ribosomal protein PSRP-3/Ycf65
Bra006467	309	111.26	39.275	-1.50225	Down	0.824537	K03676|1|2e-24|108|bdi:100821530|glutaredoxin 3	-	GO:0030611//arsenate reductase activity;GO:0015036//disulfide oxidoreductase activity	GO:0019725//cellular homeostasis	gi|674944862|emb|CDX88929.1|/3.10494e-53/BnaA03g07200D [Brassica napus]	AT5G18600.1 Thioredoxin superfamily protein
Bra006985	2121	57.635	20.285	-1.50653	Down	0.812377	K10775|1|0.0|1345|ath:AT3G53260|phenylalanine ammonia-lyase [EC:4.3.1.24]	GO:0044424	GO:0016841//ammonia-lyase activity	GO:0009411//response to UV;GO:0006558//L-phenylalanine metabolic process;GO:0009414//response to water deprivation;GO:0048229//gametophyte development;GO:0009696//salicylic acid metabolic process;GO:0009808//lignin metabolic process	gi|685363534|ref|XP_009116020.1|/0/PREDICTED: LOW QUALITY PROTEIN: phenylalanine ammonia-lyase 2 [Brassica rapa]	AT3G53260.1 phenylalanine ammonia-lyase 2
Bra002753	348	73.195	25.755	-1.50689	Down	0.818121	K15923|1|3e-53|204|mtr:MTR_4g127370|alpha-L-fucosidase 2 [EC:3.2.1.51];K07253|2|6e-39|156|ppp:PHYPADRAFT_166244|phenylpyruvate tautomerase [EC:5.3.2.1]	GO:0009536//plastid	-	GO:0009607//response to biotic stimulus	gi|674877997|emb|CDY53990.1|/1.19263e-59/BnaA03g58150D [Brassica napus]	AT5G57170.1 Tautomerase/MIF superfamily protein
Bra018169	315	896.155	314.66	-1.50995	Down	0.838224	-	GO:0009526//plastid envelope;GO:0009534//chloroplast thylakoid	-	-	gi|674947436|emb|CDX86122.1|/1.24266e-33/BnaC03g56370D [Brassica napus]	AT3G47070.1 LOCATED IN: thylakoid, chloroplast thylakoid membrane, chloroplast, chloroplast envelope; EXPRESSED IN: 22 plant structures; EXPRESSED DURING: 13 growth stages; CONTAINS InterPro DOMAIN/s: Thylakoid soluble phosphoprotein TSP9 (InterPro:IPR021584); Has 37 Blast hits to 37 proteins in 10 species: Archae - 0; Bacteria - 0; Metazoa - 0; Fungi - 0; Plants - 37; Viruses - 0; Other Eukaryot…
Bra004077	684	206.945	72.585	-1.5115	Down	0.831873	-	GO:0009526//plastid envelope	GO:0004175//endopeptidase activity	GO:0019538//protein metabolic process	gi|674925895|emb|CDY07411.1|/2.10762e-131/BnaA07g24900D [Brassica napus]	AT1G67700.2 unknown protein; FUNCTIONS IN: molecular_function unknown; INVOLVED IN: biological_process unknown; LOCATED IN: chloroplast, chloroplast envelope; EXPRESSED IN: 22 plant structures; EXPRESSED DURING: 13 growth stages; Has 49 Blast hits to 49 proteins in 20 species: Archae - 0; Bacteria - 0; Metazoa - 0; Fungi - 0; Plants - 44; Viruses - 0; Other Eukaryotes - 5 (source: NCBI BLink).
Bra011891	297	91.445	32.025	-1.51371	Down	0.822355	K14488|1|1e-39|159|aly:ARALYDRAFT_490650|SAUR family protein	GO:0016020//membrane	-	GO:0009725//response to hormone;GO:0006950//response to stress;GO:0009743//response to carbohydrate	gi|685256009|ref|XP_009133442.1|/5.1111e-46/PREDICTED: auxin-induced protein X15-like [Brassica rapa]	AT4G38840.1 SAUR-like auxin-responsive protein family
Bra002034	1077	89.545	31.325	-1.5153	Down	0.822732	-	GO:0044464	-	-	gi|674908719|emb|CDY24324.1|/0/BnaA07g02490D [Brassica napus]	AT2G17230.1 EXORDIUM like 5
Bra006272	549	70.13	24.53	-1.51548	Down	0.818022	-	GO:0009532//plastid stroma;GO:0009534//chloroplast thylakoid	GO:0043169//cation binding	GO:0006812//cation transport	gi|685281041|ref|XP_009131426.1|/4.68489e-92/PREDICTED: uncharacterized protein LOC103856101 [Brassica rapa]	AT5G14910.1 Heavy metal transport/detoxification superfamily protein
Bra024634	1404	59.38	20.76	-1.51617	Down	0.813837	K11820|1|0.0|757|aly:ARALYDRAFT_889955|N-hydroxythioamide S-beta-glucosyltransferase [EC:2.4.1.195];K13691|3|5e-104|376|pop:POPTR_810275|pathogen-inducible salicylic acid glucosyltransferase [EC:2.4.1.-]	-	GO:0035251//UDP-glucosyltransferase activity	GO:0052482;GO:0019758	gi|237682426|gb|ACR10262.1|/0/UDP-glucosyl transferase 74b1 [Brassica rapa subsp. pekinensis]	AT1G24100.1 UDP-glucosyl transferase 74B1
Bra038584	864	47.735	16.64	-1.52039	Down	0.807027	K08909|1|2e-112|402|aly:ARALYDRAFT_475174|light-harvesting complex I chlorophyll a/b binding protein 3	GO:0043234//protein complex;GO:0009570//chloroplast stroma;GO:0009534//chloroplast thylakoid	GO:0046906//tetrapyrrole binding	GO:0006091//generation of precursor metabolites and energy	gi|674906731|emb|CDY26347.1|/1.74955e-119/BnaA03g60230D [Brassica napus]	AT1G61520.3 photosystem I light harvesting complex gene 3
Bra011857	891	57.265	19.945	-1.52163	Down	0.813001	K00891|1|1e-138|490|aly:ARALYDRAFT_490732|shikimate kinase [EC:2.7.1.71]	GO:0009536//plastid	GO:0046872//metal ion binding;GO:0016301//kinase activity;GO:0032559	GO:0008652//cellular amino acid biosynthetic process;GO:0032787//monocarboxylic acid metabolic process;GO:0006796//phosphate-containing compound metabolic process	gi|674890774|emb|CDY41982.1|/1.28157e-175/BnaA01g05540D [Brassica napus]	AT4G39540.2 shikimate kinase 2
Bra026230	1650	107.99	37.595	-1.52229	Down	0.825719	K01177|1|0.0|1046|ath:AT4G17090|beta-amylase [EC:3.2.1.2]	GO:0009532//plastid stroma	GO:0016160//amylase activity;GO:0043167//ion binding	GO:0005982//starch metabolic process;GO:0006950//response to stress;GO:0000023//maltose metabolic process	gi|685261324|ref|XP_009144721.1|/0/PREDICTED: beta-amylase 3, chloroplastic-like [Brassica rapa]	AT4G17090.1 chloroplast beta-amylase
Bra018249	732	103.16	35.77	-1.52806	Down	0.825522	K12135|1|5e-12|69.3|aly:ARALYDRAFT_488429|zinc finger protein CONSTANS	GO:0044464	GO:0046914//transition metal ion binding;GO:0001071//nucleic acid binding transcription factor activity;GO:0005515//protein binding	GO:0006351//transcription, DNA-templated	gi|685306971|ref|XP_009144210.1|/1.7222e-141/PREDICTED: salt tolerance-like protein [Brassica rapa]	AT2G31380.1 salt tolerance homologue
Bra016421	756	74.55	25.81	-1.53028	Down	0.820024	K15382|1|3e-110|395|aly:ARALYDRAFT_889605|solute carrier family 50 (sugar transporter)	GO:0016021//integral component of membrane	GO:0015144//carbohydrate transmembrane transporter activity	GO:0071702	gi|674936556|emb|CDX96591.1|/1.74815e-118/BnaA08g21340D [Brassica napus]	AT1G21460.1 Nodulin MtN3 family protein
Bra003823	633	129.055	44.535	-1.53497	Down	0.828591	-	GO:0009534//chloroplast thylakoid	-	-	gi|685334579|ref|XP_009104786.1|/2.513e-118/PREDICTED: uncharacterized protein LOC103830723 [Brassica rapa]	AT1G73885.1 unknown protein; FUNCTIONS IN: molecular_function unknown; INVOLVED IN: biological_process unknown; LOCATED IN: chloroplast thylakoid membrane, chloroplast; Has 37 Blast hits to 37 proteins in 13 species: Archae - 0; Bacteria - 0; Metazoa - 0; Fungi - 0; Plants - 37; Viruses - 0; Other Eukaryotes - 0 (source: NCBI BLink).
Bra011585	846	399.45	137.44	-1.53921	Down	0.837978	K09872|1|4e-157|551|ath:AT4G35100|aquaporin PIP	GO:0031225//anchored component of membrane;GO:0043231//intracellular membrane-bounded organelle	GO:0005372//water transmembrane transporter activity	GO:0009725//response to hormone;GO:0006810//transport	gi|674879496|emb|CDY52648.1|/1.58474e-161/BnaAnng11630D [Brassica napus]	AT4G35100.2 plasma membrane intrinsic protein 3
Bra013832	927	232.67	80.015	-1.53994	Down	0.834843	K11294|1|2e-38|157|smo:SELMODRAFT_15428|nucleolin;K12741|5|7e-21|99.4|vcn:VOLCADRAFT_104291|heterogeneous nuclear ribonucleoprotein A1/A3	GO:0009526//plastid envelope;GO:0009532//plastid stroma;GO:0009534//chloroplast thylakoid	GO:0008187//poly-pyrimidine tract binding	GO:0006952//defense response;GO:0010467//gene expression;GO:0016070//RNA metabolic process	gi|685260110|ref|XP_009138497.1|/6.00094e-122/PREDICTED: 31 kDa ribonucleoprotein, chloroplastic [Brassica rapa]	AT4G24770.1 31-kDa RNA binding protein
Bra028483	501	48.78	16.77	-1.54041	Down	0.809292	-	GO:0044464	-	-	gi|685268179|ref|XP_009125171.1|/1.49943e-80/PREDICTED: uncharacterized protein LOC103850204 [Brassica rapa]	AT5G41050.1 Pollen Ole e 1 allergen and extensin family protein
Bra018149	681	157.315	53.945	-1.5441	Down	0.831348	-	GO:0044439	GO:0005515//protein binding	GO:0007031//peroxisome organization	gi|685319289|ref|XP_009149915.1|/1.82703e-129/PREDICTED: peroxisomal membrane protein 11B [Brassica rapa]	AT3G47430.1 peroxin 11B
Bra003835	702	151.055	51.78	-1.54461	Down	0.831019	K14826|1|1e-06|51.6|smo:SELMODRAFT_428238|FK506-binding nuclear protein [EC:5.2.1.8]	GO:0044424;GO:0031224//intrinsic component of membrane	GO:0016491//oxidoreductase activity;GO:0016853//isomerase activity;GO:0005527//macrolide binding	GO:0044267//cellular protein metabolic process	gi|685334620|ref|XP_009104802.1|/1.12875e-124/PREDICTED: peptidyl-prolyl cis-trans isomerase FKBP17-3, chloroplastic [Brassica rapa]	AT1G73655.1 FKBP-like peptidyl-prolyl cis-trans isomerase family protein
Bra009396	897	191.245	65.54	-1.54497	Down	0.833268	K01507|1|2e-147|519|ath:AT5G09650|inorganic pyrophosphatase [EC:3.6.1.1]	GO:0009526//plastid envelope;GO:0009532//plastid stroma	GO:0046872//metal ion binding;GO:0016462//pyrophosphatase activity	GO:0006793//phosphorus metabolic process;GO:0006952//defense response;GO:0006970//response to osmotic stress;GO:0010038//response to metal ion	gi|685379655|ref|XP_009122531.1|/2.8727e-166/PREDICTED: soluble inorganic pyrophosphatase 1, chloroplastic-like [Brassica rapa]	AT5G09650.1 pyrophosphorylase 6
Bra039268	405	49.495	16.94	-1.54685	Down	0.810375	K00360|1|7e-14|73.9|ppp:PHYPADRAFT_184973|nitrate reductase (NADH) [EC:1.7.1.1];K13076|4|4e-11|64.3|bdi:100826592|delta8-fatty-acid desaturase [EC:1.14.19.4]	-	GO:0005506//iron ion binding	-	gi|685303454|ref|XP_009142432.1|/3.35484e-74/PREDICTED: cytochrome B5 isoform C-like [Brassica rapa]	AT2G46650.1 cytochrome B5 isoform C
Bra023294	234	109.655	37.52	-1.54724	Down	0.827721	-	-	-	GO:0006950//response to stress	gi|674939677|emb|CDX93814.1|/6.61186e-38/BnaA09g24140D [Brassica napus]	AT1G32920.1 unknown protein; FUNCTIONS IN: molecular_function unknown; INVOLVED IN: response to wounding; LOCATED IN: endomembrane system; EXPRESSED IN: 23 plant structures; EXPRESSED DURING: 13 growth stages; BEST Arabidopsis thaliana protein match is: unknown protein (TAIR:AT1G32928.1); Has 42 Blast hits to 42 proteins in 8 species: Archae - 0; Bacteria - 0; Metazoa - 0; Fungi - 0; Plants - 42;…
Bra025405	348	110.05	37.63	-1.5482	Down	0.827721	-	-	-	GO:0009987//cellular process;GO:0023052//signaling	gi|674947206|emb|CDX86359.1|/1.12178e-40/BnaA06g30760D [Brassica napus]	AT3G29780.1 ralf-like 27
Bra014681	774	52.24	17.86	-1.54842	Down	0.812082	-	GO:0009523//photosystem II;GO:0009532//plastid stroma;GO:0009534//chloroplast thylakoid	GO:0046872//metal ion binding	GO:0044237//cellular metabolic process	gi|674957249|emb|CDX76002.1|/5.24234e-148/BnaA04g02660D [Brassica napus]	AT3G56650.1 Mog1/PsbP/DUF1795-like photosystem II reaction center PsbP family protein
Bra015788	351	1001.38	342.105	-1.54947	Down	0.840964	K02638|1|1e-49|191|ath:AT1G76100|plastocyanin	GO:0009532//plastid stroma;GO:0009534//chloroplast thylakoid;GO:0044436	GO:0046914//transition metal ion binding	GO:0006412//translation;GO:0010038//response to metal ion;GO:0009416//response to light stimulus;GO:0055080//cation homeostasis	gi|674946146|emb|CDX87641.1|/8.32068e-53/BnaA07g32320D [Brassica napus]	AT1G76100.1 plastocyanin 1
Bra029714	708	54.825	18.67	-1.55411	Down	0.813772	K02356|1|2e-93|340|aly:ARALYDRAFT_897011|elongation factor P	GO:0009532//plastid stroma	GO:0008135//translation factor activity, nucleic acid binding	GO:0006518//peptide metabolic process;GO:0006412//translation	gi|685312827|ref|XP_009146984.1|/1.10928e-104/PREDICTED: uncharacterized protein LOC103870595 [Brassica rapa]	AT3G08740.1 elongation factor P (EF-P) family protein
Bra023099	993	41.015	13.96	-1.55485	Down	0.803466	K00430|1|4e-176|615|aly:ARALYDRAFT_345443|peroxidase [EC:1.11.1.7]	GO:0044464	GO:0005506//iron ion binding;GO:0003824//catalytic activity;GO:0016209//antioxidant activity	GO:0006952//defense response;GO:0008152//metabolic process	gi|674885808|emb|CDY46756.1|/0/BnaA03g17000D [Brassica napus]	AT2G37130.1 Peroxidase superfamily protein
Bra013517	684	892.86	303.01	-1.55907	Down	0.841785	K08901|1|3e-79|292|aly:ARALYDRAFT_490167|photosystem II oxygen-evolving enhancer protein 3	GO:0009523//photosystem II;GO:0009532//plastid stroma;GO:0009534//chloroplast thylakoid;GO:0005576//extracellular region	GO:0046872//metal ion binding	GO:0044237//cellular metabolic process	gi|688954354|ref|NP_001288977.1|/3.87679e-101/oxygen-evolving enhancer protein 3-1, chloroplastic [Brassica rapa]	AT4G21280.1 photosystem II subunit QA
Bra017222	756	1642.41	556.785	-1.56062	Down	0.842638	K09873|1|3e-123|439|ath:AT2G36830|aquaporin TIP	GO:0031224//intrinsic component of membrane;GO:0000325//plant-type vacuole;GO:0000322;GO:0009526//plastid envelope;GO:0031090//organelle membrane	GO:0005372//water transmembrane transporter activity;GO:0042887	GO:0055085//transmembrane transport;GO:0010476//gibberellin mediated signaling pathway;GO:0015840//urea transport;GO:0042044//fluid transport	gi|685301824|ref|XP_009141610.1|/1.75769e-128/PREDICTED: aquaporin TIP1-1 [Brassica rapa]	AT2G36830.1 gamma tonoplast intrinsic protein
Bra008373	729	139.055	47.12	-1.56124	Down	0.831709	K02871|1|3e-123|438|aly:ARALYDRAFT_477028|large subunit ribosomal protein L13	GO:0009532//plastid stroma;GO:0030529//ribonucleoprotein complex	GO:0005198//structural molecule activity	GO:0003006//developmental process involved in reproduction;GO:0010467//gene expression	gi|674906199|emb|CDY26872.1|/1.11789e-134/BnaA02g18970D [Brassica napus]	AT1G78630.1 Ribosomal protein L13 family protein
Bra015135	1563	61.33	20.77	-1.56209	Down	0.818055	K00975|1|0.0|955|aly:ARALYDRAFT_899218|glucose-1-phosphate adenylyltransferase [EC:2.7.7.27]	GO:0009536//plastid	GO:0070566//adenylyltransferase activity;GO:0032559	GO:0005982//starch metabolic process;GO:0005977//glycogen metabolic process	gi|674932526|emb|CDY00843.1|/0/BnaCnng00430D [Brassica napus]	AT5G48300.1 ADP glucose pyrophosphorylase 1
Bra010167	501	262.515	88.79	-1.56393	Down	0.837403	K02437|1|3e-74|274|ath:AT1G32470|glycine cleavage system H protein	GO:0043234//protein complex;GO:0009536//plastid	GO:0005488//binding	GO:0006546//glycine catabolic process;GO:0043094	gi|674906129|emb|CDY26897.1|/1.40342e-78/BnaA05g18150D [Brassica napus]	AT1G32470.1 Single hybrid motif superfamily protein
Bra027273	618	227.98	77.075	-1.56457	Down	0.836287	K02968|1|5e-57|218|ath:AT3G15190|small subunit ribosomal protein S20	GO:0009532//plastid stroma;GO:0030529//ribonucleoprotein complex	-	GO:0009987//cellular process	gi|685311430|ref|XP_009146279.1|/5.81541e-68/PREDICTED: 30S ribosomal protein S20, chloroplastic [Brassica rapa]	AT3G15190.1 chloroplast 30S ribosomal protein S20, putative
Bra009609	399	598.18	201.83	-1.56744	Down	0.841916	-	GO:0009534//chloroplast thylakoid	GO:0005515//protein binding	-	gi|685380248|ref|XP_009122802.1|/5.80552e-48/PREDICTED: uncharacterized protein LOC103847473 [Brassica rapa]	AT5G02160.1 unknown protein; FUNCTIONS IN: molecular_function unknown; INVOLVED IN: biological_process unknown; LOCATED IN: chloroplast thylakoid membrane; EXPRESSED IN: 23 plant structures; EXPRESSED DURING: 13 growth stages; Has 121 Blast hits to 121 proteins in 17 species: Archae - 0; Bacteria - 0; Metazoa - 0; Fungi - 0; Plants - 121; Viruses - 0; Other Eukaryotes - 0 (source: NCBI BLink).
Bra004989	831	2259.47	762.265	-1.56762	Down	0.843984	K08915|1|8e-128|454|aly:ARALYDRAFT_483050|light-harvesting complex II chlorophyll a/b binding protein 4	GO:0043234//protein complex;GO:0009534//chloroplast thylakoid	GO:0046906//tetrapyrrole binding	GO:0009639//response to red or far red light;GO:0006091//generation of precursor metabolites and energy	gi|674958564|emb|CDX74808.1|/6.22231e-135/BnaA05g05540D [Brassica napus]	AT2G40100.1 light harvesting complex photosystem II
Bra017341	843	232.24	78.315	-1.56826	Down	0.837485	K02876|1|3e-115|412|aly:ARALYDRAFT_484358|large subunit ribosomal protein L15	GO:0000315//organellar large ribosomal subunit;GO:0009532//plastid stroma	GO:0005198//structural molecule activity	GO:0010467//gene expression	gi|685358971|ref|XP_009114103.1|/5.32188e-133/PREDICTED: 50S ribosomal protein L15, chloroplastic [Brassica rapa]	AT3G25920.1 ribosomal protein L15
Bra039397	189	69.68	23.455	-1.57085	Down	0.822076	-	GO:0031224//intrinsic component of membrane	-	-	gi|674926092|emb|CDY07087.1|/2.76048e-13/BnaCnng01020D [Brassica napus]	AT3G13520.1 arabinogalactan protein 12
Bra000806	429	149.775	50.415	-1.57087	Down	0.833579	K00391|1|3e-31|131|olu:OSTLU_9083|[EC:1.8.4.-];K07305|2|8e-27|117|vcn:VOLCADRAFT_76054|peptide-methionine (R)-S-oxide reductase [EC:1.8.4.12]	GO:0044444	GO:0016671//oxidoreductase activity, acting on a sulfur group of donors, disulfide as acceptor	GO:0008152//metabolic process	gi|685286784|ref|XP_009134322.1|/2.37252e-79/PREDICTED: peptide methionine sulfoxide reductase B5-like [Brassica rapa]	AT4G04830.1 methionine sulfoxide reductase B5
Bra013183	798	728.195	244.14	-1.57662	Down	0.843688	K08913|1|1e-140|497|aly:ARALYDRAFT_899321|light-harvesting complex II chlorophyll a/b binding protein 2	GO:0009526//plastid envelope;GO:0043234//protein complex;GO:0031090//organelle membrane;GO:0009570//chloroplast stroma;GO:0009534//chloroplast thylakoid	GO:0046906//tetrapyrrole binding	GO:0009639//response to red or far red light;GO:0006091//generation of precursor metabolites and energy	gi|674940425|emb|CDX93077.1|/8.65143e-142/BnaA03g37990D [Brassica napus]	AT2G05100.1 photosystem II light harvesting complex gene 2.1
Bra025816	2196	232.43	77.91	-1.57692	Down	0.838749	K01322|1|0.0|1362|aly:ARALYDRAFT_472267|prolyl oligopeptidase [EC:3.4.21.26]	GO:0009536//plastid	GO:0004175//endopeptidase activity	GO:0019538//protein metabolic process	gi|685318156|ref|XP_009149522.1|/0/PREDICTED: prolyl endopeptidase [Brassica rapa]	AT1G20380.1 Prolyl oligopeptidase family protein
Bra007555	2217	1067.29	357.75	-1.57692	Down	0.844443	K00615|1|0.0|1351|ath:AT3G60750|transketolase [EC:2.2.1.1]	GO:0009526//plastid envelope;GO:0009532//plastid stroma	GO:0005488//binding;GO:0016744	GO:0006970//response to osmotic stress;GO:0010038//response to metal ion	gi|685365246|ref|XP_009116754.1|/0/PREDICTED: transketolase-1, chloroplastic-like [Brassica rapa]	AT3G60750.1 Transketolase
Bra014663	414	181.685	60.86	-1.57787	Down	0.836714	-	GO:0009579//thylakoid;GO:0044434	-	-	gi|685296439|ref|XP_009139060.1|/4.30779e-39/PREDICTED: 50S ribosomal protein 5, chloroplastic-like [Brassica rapa]	AT3G56910.1 plastid-specific 50S ribosomal protein 5
Bra012083	999	1678.84	562.16	-1.57841	Down	0.844968	K02716|1|0.0|656|aly:ARALYDRAFT_920071|photosystem II oxygen-evolving enhancer protein 1	GO:0009523//photosystem II;GO:0009534//chloroplast thylakoid;GO:0009570//chloroplast stroma;GO:0005576//extracellular region	GO:0008187//poly-pyrimidine tract binding;GO:0046872//metal ion binding;GO:0016491//oxidoreductase activity	GO:0006952//defense response;GO:0006470//protein dephosphorylation;GO:0009767//photosynthetic electron transport chain;GO:0042548//regulation of photosynthesis, light reaction	gi|674887419|emb|CDY45242.1|/0/BnaA07g12480D [Brassica napus]	AT5G66570.1 PS II oxygen-evolving complex 1
Bra040427	918	56.38	18.85	-1.58062	Down	0.818121	K02838|1|4e-101|365|aly:ARALYDRAFT_907901|ribosome recycling factor	GO:0009532//plastid stroma	GO:0046914//transition metal ion binding	GO:0006412//translation;GO:0009657//plastid organization;GO:0007275//multicellular organismal development;GO:0050832//defense response to fungus	gi|674944500|emb|CDX89180.1|/5.71084e-152/BnaA04g00060D [Brassica napus]	AT3G63190.1 ribosome recycling factor, chloroplast precursor
Bra021042	669	126.255	42.105	-1.58428	Down	0.832989	-	GO:0009526//plastid envelope;GO:0009532//plastid stroma	-	GO:0009987//cellular process	gi|685344009|ref|XP_009108335.1|/1.07405e-85/PREDICTED: 50S ribosomal protein L19-1, chloroplastic [Brassica rapa]	AT4G17560.1 Ribosomal protein L19 family protein
Bra020332	402	63.02	20.99	-1.58611	Down	0.821452	-	-	-	GO:0006950//response to stress	gi|674900219|emb|CDY32659.1|/7.99454e-55/BnaA02g07210D [Brassica napus]	AT5G59080.1 unknown protein; FUNCTIONS IN: molecular_function unknown; INVOLVED IN: response to oxidative stress; LOCATED IN: chloroplast; EXPRESSED IN: 18 plant structures; EXPRESSED DURING: 9 growth stages; BEST Arabidopsis thaliana protein match is: unknown protein (TAIR:AT3G46880.1); Has 1807 Blast hits to 1807 proteins in 277 species: Archae - 0; Bacteria - 0; Metazoa - 736; Fungi - 347; Pla…
Bra023108	876	233.125	77.57	-1.58753	Down	0.839143	K11294|1|1e-35|148|smo:SELMODRAFT_15428|nucleolin;K13201|4|2e-21|100|bdi:100828363|nucleolysin TIA-1/TIAR	GO:0009526//plastid envelope;GO:0009532//plastid stroma;GO:0009534//chloroplast thylakoid	GO:0008187//poly-pyrimidine tract binding	GO:0009725//response to hormone;GO:0006952//defense response	gi|685284468|ref|XP_009133135.1|/7.82812e-131/PREDICTED: ribonucleoprotein At2g37220, chloroplastic-like [Brassica rapa]	AT2G37220.1 RNA-binding (RRM/RBD/RNP motifs) family protein
Bra017421	234	85.915	28.565	-1.58866	Down	0.827836	-	GO:0016020//membrane;GO:0005618//cell wall	GO:0016787//hydrolase activity;GO:0004857//enzyme inhibitor activity	GO:0006950//response to stress	gi|674929187|emb|CDY04121.1|/9.15473e-38/BnaA09g18990D [Brassica napus]	AT2G02130.1 low-molecular-weight cysteine-rich 68
Bra029202	945	40.715	13.495	-1.59314	Down	0.807257	-	-	-	-	gi|685278682|ref|XP_009130272.1|/8.33248e-169/PREDICTED: uncharacterized protein LOC103855064 [Brassica rapa]	AT5G63780.1 RING/FYVE/PHD zinc finger superfamily protein
Bra018062	966	224.38	74.365	-1.59325	Down	0.838831	K00861|1|1e-11|68.6|bdi:100832727|riboflavin kinase [EC:2.7.1.26]	GO:0009526//plastid envelope;GO:0009532//plastid stroma	GO:0016788//hydrolase activity, acting on ester bonds	GO:0006259//DNA metabolic process	gi|685318996|ref|XP_009149822.1|/2.62915e-161/PREDICTED: haloacid dehalogenase-like hydrolase domain-containing protein At3g48420 [Brassica rapa]	AT3G48420.1 Haloacid dehalogenase-like hydrolase (HAD) superfamily protein
Bra002424	2577	38.645	12.805	-1.59357	Down	0.805091	-	GO:0009526//plastid envelope;GO:0009534//chloroplast thylakoid	-	GO:0007275//multicellular organismal development;GO:0003006//developmental process involved in reproduction;GO:0009657//plastid organization	gi|685374958|ref|XP_009120639.1|/0/PREDICTED: uncharacterized protein LOC103845523 [Brassica rapa]	AT5G22640.1 MORN (Membrane Occupation and Recognition Nexus) repeat-containing protein
Bra004810	1671	38.305	12.66	-1.59726	Down	0.805123	K00297|1|0.0|1083|aly:ARALYDRAFT_483539|methylenetetrahydrofolate reductase (NADPH) [EC:1.5.1.20]	-	GO:0016646//oxidoreductase activity, acting on the CH-NH group of donors, NAD or NADP as acceptor	GO:0000096//sulfur amino acid metabolic process	gi|685304556|ref|XP_009142999.1|/0/PREDICTED: LOW QUALITY PROTEIN: methylenetetrahydrofolate reductase 2 [Brassica rapa]	AT2G44160.1 methylenetetrahydrofolate reductase 2
Bra027877	1599	210.92	69.685	-1.59778	Down	0.838929	K02492|1|0.0|915|ath:AT1G58290|glutamyl-tRNA reductase [EC:1.2.1.70]	GO:0009536//plastid	GO:0016620//oxidoreductase activity, acting on the aldehyde or oxo group of donors, NAD or NADP as acceptor;GO:0016616//oxidoreductase activity, acting on the CH-OH group of donors, NAD or NADP as acceptor;GO:0000166//nucleotide binding	GO:0009314//response to radiation;GO:0006779//porphyrin-containing compound biosynthetic process;GO:0006950//response to stress	gi|685357030|ref|XP_009113325.1|/0/PREDICTED: glutamyl-tRNA reductase 1, chloroplastic [Brassica rapa]	AT1G58290.1 Glutamyl-tRNA reductase family protein
Bra040482	504	552.66	182.335	-1.5998	Down	0.843738	-	GO:0009526//plastid envelope;GO:0009534//chloroplast thylakoid;GO:0009522//photosystem I;GO:0000229	-	GO:0009725//response to hormone;GO:0009767//photosynthetic electron transport chain	gi|674884495|emb|CDY48012.1|/4.86791e-64/BnaA04g26780D [Brassica napus]	AT2G46820.2 photosystem I P subunit
Bra001392	1290	163.785	53.975	-1.60144	Down	0.836451	K10257|1|0.0|770|aly:ARALYDRAFT_478456|omega-3 fatty acid desaturase (delta-15 desaturase) [EC:1.14.19.-]	GO:0009526//plastid envelope	GO:0016705//oxidoreductase activity, acting on paired donors, with incorporation or reduction of molecular oxygen	GO:0009628//response to abiotic stimulus;GO:0006631//fatty acid metabolic process	gi|685288403|ref|XP_009135154.1|/0/PREDICTED: omega-3 fatty acid desaturase, chloroplastic-like [Brassica rapa]	AT3G11170.1 fatty acid desaturase 7
Bra002370	654	162.62	53.185	-1.61241	Down	0.836894	-	GO:0009534//chloroplast thylakoid	-	-	gi|685375185|ref|XP_009120711.1|/1.86771e-95/PREDICTED: uncharacterized protein LOC103845598 [Brassica rapa]	AT5G21430.1 Chaperone DnaJ-domain superfamily protein
Bra013013	1164	597.525	195.095	-1.61482	Down	0.844443	-	GO:0009534//chloroplast thylakoid	-	GO:0010119//regulation of stomatal movement;GO:0051592//response to calcium ion	gi|685290885|ref|XP_009136394.1|/0/PREDICTED: calcium sensing receptor, chloroplastic [Brassica rapa]	AT5G23060.1 calcium sensing receptor
Bra039202	1290	44.6	14.555	-1.61553	Down	0.812213	K15400|1|1e-29|129|aly:ARALYDRAFT_493874|omega-hydroxypalmitate O-feruloyl transferase [EC:2.3.1.188]	-	GO:0016410//N-acyltransferase activity	-	gi|674886524|emb|CDY46072.1|/0/BnaA09g41960D [Brassica napus]	AT2G23510.1 spermidine disinapoyl acyltransferase
Bra028174	546	22290.3	7266.99	-1.61698	Down	0.847512	K01602|1|4e-95|344|aly:ARALYDRAFT_494137|ribulose-bisphosphate carboxylase small chain [EC:4.1.1.39]	GO:0009536//plastid	GO:0016491//oxidoreductase activity;GO:0016831//carboxy-lyase activity	GO:0043094;GO:0015977//carbon fixation	gi|132091|sp|P27985.1|RBS2_BRANA/6.21187e-97/RecName: Full=Ribulose bisphosphate carboxylase small chain F1, chloroplastic; Short=RuBisCO small subunit F1; Flags: Precursor [Brassica napus]	AT5G38430.1 Ribulose bisphosphate carboxylase (small chain) family protein
Bra028271	327	346.865	112.42	-1.62548	Down	0.843639	-	GO:0009532//plastid stroma	GO:0051536//iron-sulfur cluster binding	-	gi|685263952|ref|XP_009107238.1|/5.07405e-58/PREDICTED: CDGSH iron-sulfur domain-containing protein NEET [Brassica rapa]	AT5G51720.1 2 iron, 2 sulfur cluster binding
Bra029815	696	114.4	37.02	-1.62771	Down	0.834105	K01802|1|2e-26|117|aly:ARALYDRAFT_472316|peptidylprolyl isomerase [EC:5.2.1.8];K14826|4|7e-16|82.0|cre:CHLREDRAFT_106360|FK506-binding nuclear protein [EC:5.2.1.8]	GO:0009534//chloroplast thylakoid	GO:0016859//cis-trans isomerase activity;GO:0005527//macrolide binding	GO:0044267//cellular protein metabolic process	gi|685312609|ref|XP_009146873.1|/6.45841e-115/PREDICTED: peptidyl-prolyl cis-trans isomerase FKBP16-4, chloroplastic [Brassica rapa]	AT3G10060.1 FKBP-like peptidyl-prolyl cis-trans isomerase family protein
Bra021936	567	78.015	25.205	-1.63004	Down	0.828197	K12603|1|3e-26|115|vcn:VOLCADRAFT_106614|CCR4-NOT transcription complex subunit 6	GO:0009534//chloroplast thylakoid	GO:0005515//protein binding	GO:0009553//embryo sac development	gi|685301434|ref|XP_009141407.1|/5.30833e-97/PREDICTED: protein disulfide-isomerase LQY1 [Brassica rapa]	AT2G34860.2 DnaJ/Hsp40 cysteine-rich domain superfamily protein
Bra029563	681	1627.27	525.24	-1.6314	Down	0.847233	K08901|1|2e-92|336|aly:ARALYDRAFT_490167|photosystem II oxygen-evolving enhancer protein 3	GO:0009523//photosystem II;GO:0009532//plastid stroma;GO:0009534//chloroplast thylakoid;GO:0005576//extracellular region	GO:0046872//metal ion binding	GO:0044237//cellular metabolic process	gi|685359911|ref|XP_009114497.1|/4.96858e-103/PREDICTED: oxygen-evolving enhancer protein 3-2, chloroplastic [Brassica rapa]	AT4G05180.1 photosystem II subunit Q-2
Bra033787	408	407.985	131.425	-1.63428	Down	0.844214	-	GO:0009536//plastid	GO:0005515//protein binding	GO:0044267//cellular protein metabolic process	gi|674950377|emb|CDX83023.1|/1.11587e-60/BnaA01g20230D [Brassica napus]	AT3G47650.1 DnaJ/Hsp40 cysteine-rich domain superfamily protein
Bra037847	711	38.07	12.225	-1.63882	Down	0.807634	K01955|1|2e-08|57.8|vvi:100262205|carbamoyl-phosphate synthase large subunit [EC:6.3.5.5]	-	-	-	gi|685354163|ref|XP_009112217.1|/2.10509e-113/PREDICTED: LOB domain-containing protein 37-like [Brassica rapa]	AT5G67420.1 LOB domain-containing protein 37
Bra024261	513	895.57	287.565	-1.63892	Down	0.847135	K02701|1|3e-64|241|aly:ARALYDRAFT_496598|photosystem I subunit PsaN	GO:0009534//chloroplast thylakoid;GO:0009522//photosystem I	GO:0005515//protein binding	GO:0009767//photosynthetic electron transport chain	gi|674888905|emb|CDY43783.1|/3.44169e-67/BnaA06g23190D [Brassica napus]	AT5G64040.1 photosystem I reaction center subunit PSI-N, chloroplast, putative / PSI-N, putative (PSAN)
Bra004323	507	216.565	69.53	-1.63909	Down	0.841391	-	GO:0009534//chloroplast thylakoid;GO:0030529//ribonucleoprotein complex	GO:0005198//structural molecule activity	GO:0010467//gene expression	gi|685336143|ref|XP_009105409.1|/1.36829e-82/PREDICTED: 30S ribosomal protein 3-1, chloroplastic-like [Brassica rapa]	AT1G68590.1 Ribosomal protein PSRP-3/Ycf65
Bra030868	177	118.725	38.09	-1.64014	Down	0.835401	-	-	-	-	gi|674908974|emb|CDY24040.1|/6.2314e-06/BnaA06g00380D [Brassica napus]	AT1G55330.1 arabinogalactan protein 21
Bra021879	909	366.27	117.47	-1.64062	Down	0.844558	K02988|1|2e-81|300|aly:ARALYDRAFT_482332|small subunit ribosomal protein S5	GO:0005622//intracellular	-	-	gi|685301298|ref|XP_009141346.1|/1.08437e-96/PREDICTED: 30S ribosomal protein S5, chloroplastic [Brassica rapa]	AT2G33800.1 Ribosomal protein S5 family protein
Bra033287	579	106.98	34.27	-1.64232	Down	0.83399	K11294|1|2e-21|100|smo:SELMODRAFT_15428|nucleolin;K13126|2|4e-15|79.0|olu:OSTLU_50098|polyadenylate-binding protein;K14411|5|4e-15|79.0|cme:CMR392C|RNA-binding protein Musashi	GO:0009526//plastid envelope;GO:0032991//macromolecular complex;GO:0009532//plastid stroma	GO:0003676//nucleic acid binding	-	gi|685372081|ref|XP_009119667.1|/1.85006e-111/PREDICTED: 28 kDa ribonucleoprotein, chloroplastic [Brassica rapa]	AT1G01080.1 RNA-binding (RRM/RBD/RNP motifs) family protein
Bra037385	1299	49.53	15.855	-1.64336	Down	0.817481	-	-	-	-	gi|685352077|ref|XP_009111417.1|/0/PREDICTED: protein trichome birefringence-like 26 [Brassica rapa]	AT4G01080.1 TRICHOME BIREFRINGENCE-LIKE 26
Bra008216	456	38.69	12.265	-1.65741	Down	0.809751	-	GO:0009532//plastid stroma;GO:0009534//chloroplast thylakoid	GO:0005515//protein binding	GO:0044267//cellular protein metabolic process	gi|685274174|ref|XP_009128122.1|/2.02713e-76/PREDICTED: protein disulfide-isomerase LQY1 [Brassica rapa]	AT1G75690.1 DnaJ/Hsp40 cysteine-rich domain superfamily protein
Bra010116	690	38.78	12.25	-1.66253	Down	0.809915	-	GO:0031224//intrinsic component of membrane;GO:0009528//plastid inner membrane	-	-	gi|674933162|emb|CDY00322.1|/1.11094e-105/BnaA06g22230D [Brassica napus]	AT5G62720.2 Integral membrane HPP family protein
Bra017201	867	229.005	72.295	-1.66341	Down	0.843081	K11294|1|2e-37|154|smo:SELMODRAFT_15428|nucleolin;K13201|4|1e-18|91.7|bdi:100828363|nucleolysin TIA-1/TIAR	GO:0009526//plastid envelope;GO:0009532//plastid stroma;GO:0009534//chloroplast thylakoid	GO:0008187//poly-pyrimidine tract binding	GO:0009725//response to hormone;GO:0006952//defense response	gi|685301877|ref|XP_009141639.1|/1.87302e-107/PREDICTED: ribonucleoprotein At2g37220, chloroplastic-like [Brassica rapa]	AT2G37220.1 RNA-binding (RRM/RBD/RNP motifs) family protein
Bra037319	1689	55.265	17.39	-1.66811	Down	0.822831	K14494|1|1e-19|96.3|rcu:RCOM_0826140|DELLA protein	-	GO:0005488//binding	GO:0010074//maintenance of meristem identity;GO:0006351//transcription, DNA-templated;GO:0000904//cell morphogenesis involved in differentiation	gi|685352325|ref|XP_009111514.1|/0/PREDICTED: scarecrow-like protein 6 [Brassica rapa]	AT4G00150.1 GRAS family transcription factor
Bra027017	711	174.735	54.915	-1.6699	Down	0.84126	-	GO:0009532//plastid stroma	-	-	gi|674885652|emb|CDY46922.1|/6.58532e-122/BnaA09g12720D [Brassica napus]	AT1G62780.1 unknown protein; FUNCTIONS IN: molecular_function unknown; INVOLVED IN: biological_process unknown; LOCATED IN: chloroplast, chloroplast stroma; EXPRESSED IN: 22 plant structures; EXPRESSED DURING: 14 growth stages; Has 94 Blast hits to 94 proteins in 35 species: Archae - 6; Bacteria - 10; Metazoa - 21; Fungi - 2; Plants - 48; Viruses - 0; Other Eukaryotes - 7 (source: NCBI BLink).
Bra025304	576	472.44	148.385	-1.67079	Down	0.847332	K02935|1|4e-54|208|aly:ARALYDRAFT_484572|large subunit ribosomal protein L7/L12	GO:0000315//organellar large ribosomal subunit;GO:0009532//plastid stroma;GO:0009534//chloroplast thylakoid	GO:0005488//binding;GO:0005198//structural molecule activity	GO:0006952//defense response;GO:0010467//gene expression	gi|674947314|emb|CDX86467.1|/3.25587e-68/BnaA06g31840D [Brassica napus]	AT3G27850.1 ribosomal protein L12-C
Bra025037	1224	501.725	156.97	-1.67641	Down	0.847955	K15283|1|0.0|677|aly:ARALYDRAFT_494366|solute carrier family 35, member E1	GO:0009941//chloroplast envelope;GO:0031224//intrinsic component of membrane	GO:0005342//organic acid transmembrane transporter activity;GO:0015145//monosaccharide transmembrane transporter activity	GO:0015717//triose phosphate transport;GO:0009642//response to light intensity;GO:0015711//organic anion transport	gi|685326271|ref|XP_009101543.1|/0/PREDICTED: triose phosphate/phosphate translocator, chloroplastic isoform X1 [Brassica rapa]	AT5G46110.1 Glucose-6-phosphate/phosphate translocator-related
Bra012891	858	38.045	11.89	-1.67796	Down	0.810178	K14503|1|7e-64|241|vvi:100249673|brassinosteroid resistant 1/2	GO:0043231//intracellular membrane-bounded organelle	-	-	gi|685291212|ref|XP_009136556.1|/2.98567e-131/PREDICTED: BES1/BZR1 homolog protein 1 [Brassica rapa]	AT3G50750.1 BES1/BZR1 homolog 1
Bra023302	660	233.205	72.87	-1.6782	Down	0.844214	K02867|1|1e-88|323|ath:AT1G32990|large subunit ribosomal protein L11	GO:0009526//plastid envelope;GO:0009532//plastid stroma;GO:0015934//large ribosomal subunit	GO:0005198//structural molecule activity	GO:0010467//gene expression;GO:0022613//ribonucleoprotein complex biogenesis	gi|685360698|ref|XP_009114843.1|/2.5814e-89/PREDICTED: 50S ribosomal protein L11, chloroplastic [Brassica rapa]	AT1G32990.1 plastid ribosomal protein l11
Bra016017	1266	49.125	15.33	-1.6801	Down	0.819696	-	GO:0009534//chloroplast thylakoid	GO:0017111//nucleoside-triphosphatase activity;GO:0032559	-	gi|685337635|ref|XP_009105962.1|/0/PREDICTED: ribulose bisphosphate carboxylase/oxygenase activase, chloroplastic [Brassica rapa]	AT1G73110.1 P-loop containing nucleoside triphosphate hydrolases superfamily protein
Bra007103	1185	30.565	9.42	-1.69808	Down	0.801185	K15015|1|0.0|633|aly:ARALYDRAFT_669769|solute carrier family 32 (vesicular inhibitory amino acid transporter)	GO:0031090//organelle membrane;GO:0031224//intrinsic component of membrane	GO:0005275//amine transmembrane transporter activity	GO:0015837//amine transport	gi|674955541|emb|CDX78269.1|/0/BnaA09g34640D [Brassica napus]	AT2G39130.1 Transmembrane amino acid transporter family protein
Bra012676	1647	453.05	139.12	-1.70334	Down	0.848858	K01177|1|0.0|1094|ath:AT4G17090|beta-amylase [EC:3.2.1.2]	GO:0009532//plastid stroma	GO:0016160//amylase activity;GO:0043167//ion binding	GO:0005982//starch metabolic process;GO:0006950//response to stress;GO:0000023//maltose metabolic process	gi|685291769|ref|XP_009136825.1|/0/PREDICTED: beta-amylase 3, chloroplastic [Brassica rapa]	AT4G17090.1 chloroplast beta-amylase
Bra040916	627	144.405	44.26	-1.70605	Down	0.841768	-	GO:0009534//chloroplast thylakoid;GO:0030529//ribonucleoprotein complex	GO:0003723//RNA binding;GO:0005198//structural molecule activity	GO:0010467//gene expression;GO:0009987//cellular process	gi|685385385|ref|XP_009124663.1|/9.51515e-78/PREDICTED: 30S ribosomal protein S6 alpha, chloroplastic [Brassica rapa]	AT1G64510.1 Translation elongation factor EF1B/ribosomal protein S6 family protein
Bra017335	1596	43.75	13.375	-1.70974	Down	0.817612	K10615|1|9e-07|53.5|cme:CMB070C|E3 ubiquitin-protein ligase HERC4 [EC:6.3.2.19]	-	GO:0017016//Ras GTPase binding	-	gi|685358961|ref|XP_009114097.1|/0/PREDICTED: ultraviolet-B receptor UVR8-like [Brassica rapa]	AT3G26100.2 Regulator of chromosome condensation (RCC1) family protein
Bra022748	474	48.445	14.805	-1.71026	Down	0.821222	K00366|1|3e-07|52.4|ota:Ot10g00930|ferredoxin-nitrite reductase [EC:1.7.7.1]	-	GO:0043169//cation binding	-	gi|674948914|emb|CDX84893.1|/7.50578e-66/BnaA03g13370D [Brassica napus]	AT5G51010.1 Rubredoxin-like superfamily protein
Bra013674	696	45.205	13.785	-1.71338	Down	0.818958	-	-	-	-	gi|685259686|ref|XP_009136680.1|/6.86629e-134/PREDICTED: thaumatin-like protein 1 [Brassica rapa]	AT4G11650.1 osmotin 34
Bra016189	588	32.63	9.925	-1.71706	Down	0.805993	-	GO:0034357;GO:0043234//protein complex	GO:0016651//oxidoreductase activity, acting on NAD(P)H	GO:0009767//photosynthetic electron transport chain	gi|685337030|ref|XP_009105744.1|/4.26373e-112/PREDICTED: uncharacterized protein LOC103831610 [Brassica rapa]	AT1G70760.1 inorganic carbon transport protein-related
Bra039236	1530	54.5	16.57	-1.71768	Down	0.82567	K00517|1|1e-145|514|ath:AT3G26310|[EC:1.14.-.-]	GO:0016020//membrane;GO:0043231//intracellular membrane-bounded organelle	GO:0016491//oxidoreductase activity;GO:0005506//iron ion binding	GO:0008152//metabolic process	gi|685366350|ref|XP_009117240.1|/0/PREDICTED: cytochrome P450 71B6 [Brassica rapa]	AT2G24180.1 cytochrome p450 71b6
Bra005347	501	32.645	9.915	-1.71918	Down	0.806026	K02437|1|2e-74|275|ath:AT1G32470|glycine cleavage system H protein	GO:0043234//protein complex;GO:0009536//plastid	GO:0005488//binding	GO:0006546//glycine catabolic process;GO:0043094	gi|685305899|ref|XP_009143678.1|/4.3652e-78/PREDICTED: glycine cleavage system H protein 3, mitochondrial [Brassica rapa]	AT1G32470.1 Single hybrid motif superfamily protein
Bra038389	858	90.3	27.42	-1.7195	Down	0.836238	K11294|1|5e-12|69.7|zma:100273020|nucleolin;K12741|3|1e-07|54.7|vcn:VOLCADRAFT_104291|heterogeneous nuclear ribonucleoprotein A1/A3;K12881|4|4e-07|53.1|vcn:VOLCADRAFT_90392|THO complex subunit 4	GO:0009532//plastid stroma	GO:0003676//nucleic acid binding	-	gi|685357519|ref|XP_009113528.1|/1.84236e-127/PREDICTED: 33 kDa ribonucleoprotein, chloroplastic [Brassica rapa]	AT4G09040.1 RNA-binding (RRM/RBD/RNP motifs) family protein
Bra035486	501	604.085	181.945	-1.73125	Down	0.851697	K02437|1|2e-73|271|ath:AT1G32470|glycine cleavage system H protein	GO:0043234//protein complex;GO:0009536//plastid	GO:0005488//binding	GO:0006546//glycine catabolic process;GO:0043094	gi|685342974|ref|XP_009107967.1|/1.39216e-77/PREDICTED: glycine cleavage system H protein 3, mitochondrial-like [Brassica rapa]	AT1G32470.1 Single hybrid motif superfamily protein
Bra001950	2271	130.39	39.18	-1.73464	Down	0.842129	K13420|1|2e-27|122|sbi:SORBI_06g028760|LRR receptor-like serine/threonine-protein kinase FLS2 [EC:2.7.11.1]	GO:0005618//cell wall	GO:0005198//structural molecule activity;GO:0005488//binding	-	gi|685289915|ref|XP_009135898.1|/0/PREDICTED: leucine-rich repeat extensin-like protein 4 [Brassica rapa]	AT3G24480.1 Leucine-rich repeat (LRR) family protein
Bra021074	393	187.63	56.255	-1.73784	Down	0.846954	-	-	-	-	-	-
Bra019584	1428	40.29	12.075	-1.7384	Down	0.817185	K01051|1|1e-116|418|bdi:100831935|pectinesterase [EC:3.1.1.11]	GO:0005618//cell wall	GO:0030234//enzyme regulator activity	GO:0071555//cell wall organization	gi|685319986|ref|XP_009150156.1|/0/PREDICTED: probable pectinesterase/pectinesterase inhibitor 34 [Brassica rapa]	AT3G49220.1 Plant invertase/pectin methylesterase inhibitor superfamily
Bra027035	1386	146.87	44	-1.73896	Down	0.844558	K00485|1|3e-157|552|ath:AT1G12200|dimethylaniline monooxygenase (N-oxide forming) [EC:1.14.13.8];K11816|5|1e-18|92.8|rcu:RCOM_0927500|YUCCA family monooxygenase [EC:1.14.13.-]	-	GO:0016709//oxidoreductase activity, acting on paired donors, with incorporation or reduction of molecular oxygen, NAD(P)H as one donor, and incorporation of one atom of oxygen;GO:0050662//coenzyme binding;GO:0000166//nucleotide binding	GO:0019761//glucosinolate biosynthetic process	gi|237682454|gb|ACR10274.1|/0/flavin-monooxygenase [Brassica rapa subsp. pekinensis]	AT1G62540.1 flavin-monooxygenase glucosinolate S-oxygenase 2
Bra023909	150	1320.43	394.46	-1.74306	Down	0.854273	-	GO:0009523//photosystem II;GO:0009534//chloroplast thylakoid	-	-	gi|674895567|emb|CDY37320.1|/3.41547e-11/BnaA01g25400D [Brassica napus]	AT3G21055.1 photosystem II subunit T
Bra030182	804	7866.36	2349.55	-1.74331	Down	0.855127	K08912|1|5e-143|504|ath:AT1G29930|light-harvesting complex II chlorophyll a/b binding protein 1	GO:0043234//protein complex;GO:0009570//chloroplast stroma;GO:0009534//chloroplast thylakoid;GO:0005576//extracellular region	GO:0046906//tetrapyrrole binding	GO:0009746;GO:0009639//response to red or far red light;GO:0006091//generation of precursor metabolites and energy	gi|674889513|emb|CDY43198.1|/8.84358e-145/BnaA07g07560D [Brassica napus]	AT1G29930.1 chlorophyll A/B binding protein 1
Bra012022	492	64.64	19.285	-1.74495	Down	0.832168	-	GO:0044464	-	-	gi|685331549|ref|XP_009103596.1|/6.90246e-78/PREDICTED: uncharacterized protein LOC103829663 [Brassica rapa]	AT2G27385.3 Pollen Ole e 1 allergen and extensin family protein
Bra004683	429	80.565	23.985	-1.74802	Down	0.838273	-	GO:0009526//plastid envelope;GO:0009532//plastid stroma;GO:0030529//ribonucleoprotein complex	GO:0005198//structural molecule activity	GO:0003006//developmental process involved in reproduction;GO:0010467//gene expression;GO:0022613//ribonucleoprotein complex biogenesis	gi|685304217|ref|XP_009142825.1|/2.83262e-72/PREDICTED: 50S ribosomal protein L31, chloroplastic-like [Brassica rapa]	AT1G75350.1 Ribosomal protein L31
Bra033975	1323	47.47	14.13	-1.74825	Down	0.824931	K01206|1|2e-168|590|ath:AT1G67830|alpha-L-fucosidase [EC:3.2.1.51];K00514|3|4e-31|134|rcu:RCOM_1428040|zeta-carotene desaturase [EC:1.3.5.6]	GO:0005618//cell wall	GO:0015928//fucosidase activity	GO:0044238	gi|674920607|emb|CDY12671.1|/0/BnaA02g13390D [Brassica napus]	AT1G67830.1 alpha-fucosidase 1
Bra025210	762	143.735	42.725	-1.75026	Down	0.846052	K09873|1|4e-119|425|ath:AT3G26520|aquaporin TIP	GO:0031224//intrinsic component of membrane;GO:0000325//plant-type vacuole;GO:0000322;GO:0009526//plastid envelope;GO:0031090//organelle membrane;GO:0044420//extracellular matrix part	GO:0005372//water transmembrane transporter activity;GO:0042887	GO:0055085//transmembrane transport;GO:0006952//defense response;GO:0048878//chemical homeostasis;GO:0010476//gibberellin mediated signaling pathway;GO:0015840//urea transport;GO:0042044//fluid transport	gi|685324980|ref|XP_009152050.1|/9.62977e-130/PREDICTED: aquaporin TIP1-2 [Brassica rapa]	AT3G26520.1 tonoplast intrinsic protein 2
Bra024957	660	86.505	25.685	-1.75186	Down	0.83934	-	GO:0009526//plastid envelope;GO:0009532//plastid stroma;GO:0030529//ribonucleoprotein complex	GO:0005198//structural molecule activity	GO:0010467//gene expression;GO:0022613//ribonucleoprotein complex biogenesis	gi|685325993|ref|XP_009101442.1|/1.83352e-89/PREDICTED: 50S ribosomal protein L19-2, chloroplastic [Brassica rapa]	AT5G47190.1 Ribosomal protein L19 family protein
Bra037592	3744	28.9	8.54	-1.75876	Down	0.804418	K10144|1|5e-49|195|bdi:100828315|RING finger and CHY zinc finger domain-containing protein 1 [EC:6.3.2.19]	-	GO:0046914//transition metal ion binding	GO:0003006//developmental process involved in reproduction;GO:0009267//cellular response to starvation	gi|685265025|ref|XP_009112822.1|/0/PREDICTED: uncharacterized protein LOC103838149 [Brassica rapa]	AT3G18290.1 zinc finger protein-related
Bra027168	1065	38.095	11.24	-1.76096	Down	0.817809	K01206|1|2e-27|121|ath:AT1G67830|alpha-L-fucosidase [EC:3.2.1.51];K00514|3|5e-19|93.2|rcu:RCOM_1428040|zeta-carotene desaturase [EC:1.3.5.6]	GO:0005576//extracellular region	GO:0016787//hydrolase activity;GO:0005488//binding	GO:0044238	gi|674876287|emb|CDY56196.1|/0/BnaA05g36890D [Brassica napus]	AT3G16370.1 GDSL-like Lipase/Acylhydrolase superfamily protein
Bra038621	699	83.975	24.715	-1.76457	Down	0.839799	K00940|1|4e-104|375|ath:AT5G63310|nucleoside-diphosphate kinase [EC:2.7.4.6]	GO:0009532//plastid stroma;GO:0009526//plastid envelope	GO:0005515//protein binding;GO:0032559;GO:0016776//phosphotransferase activity, phosphate group as acceptor	GO:0009209;GO:0007602//phototransduction;GO:0009755//hormone-mediated signaling pathway;GO:0006796//phosphate-containing compound metabolic process;GO:0000302//response to reactive oxygen species;GO:0009206;GO:0009132//nucleoside diphosphate metabolic process	gi|685320668|ref|XP_009150388.1|/7.47226e-134/PREDICTED: nucleoside diphosphate kinase II, chloroplastic-like [Brassica rapa]	AT5G63310.1 nucleoside diphosphate kinase 2
Bra007731	270	1533.6	449.955	-1.76907	Down	0.857802	-	-	-	-	gi|674876115|emb|CDY56460.1|/3.59849e-15/BnaA09g55760D [Brassica napus]	-
Bra013786	2136	45.525	13.33	-1.77198	Down	0.825505	K03283|1|0.0|1241|ath:AT4G24280|heat shock 70kDa protein 1/8	GO:0009532//plastid stroma;GO:0009526//plastid envelope	GO:0005515//protein binding;GO:0032559	GO:0010038//response to metal ion;GO:0044267//cellular protein metabolic process;GO:0006605//protein targeting;GO:0006950//response to stress	gi|685259957|ref|XP_009137922.1|/0/PREDICTED: heat shock 70 kDa protein 6, chloroplastic [Brassica rapa]	AT4G24280.1 chloroplast heat shock protein 70-1
Bra021447	759	78.755	22.9	-1.78202	Down	0.840226	-	GO:0009532//plastid stroma;GO:0009534//chloroplast thylakoid	-	GO:0043623//cellular protein complex assembly	gi|685266104|ref|XP_009118176.1|/1.76827e-135/PREDICTED: uncharacterized protein LOC103843223 isoform X1 [Brassica rapa]	AT2G47910.1 chlororespiratory reduction 6
Bra019637	690	136.9	39.7	-1.78591	Down	0.848562	K03386|1|2e-49|192|ath:AT1G60740|peroxiredoxin (alkyl hydroperoxide reductase subunit C) [EC:1.11.1.15];K11187|2|2e-43|173|cre:CHLREDRAFT_196639|peroxiredoxin 5, atypical 2-Cys peroxiredoxin [EC:1.11.1.15]	GO:0009532//plastid stroma;GO:0005618//cell wall	GO:0016209//antioxidant activity;GO:0005488//binding;GO:0016705//oxidoreductase activity, acting on paired donors, with incorporation or reduction of molecular oxygen	GO:0006952//defense response;GO:0008152//metabolic process;GO:0019725//cellular homeostasis	gi|685316281|ref|XP_009148754.1|/9.0907e-107/PREDICTED: peroxiredoxin-2E, chloroplastic-like [Brassica rapa]	AT3G52960.1 Thioredoxin superfamily protein
Bra040773	498	191.61	55.55	-1.78631	Down	0.851828	-	GO:0030529//ribonucleoprotein complex;GO:0009536//plastid	GO:0005198//structural molecule activity	GO:0010467//gene expression;GO:0022613//ribonucleoprotein complex biogenesis	gi|674898820|emb|CDY34080.1|/2.7913e-48/BnaA09g27060D [Brassica napus]	AT1G29070.1 Ribosomal protein L34
Bra032943	795	29.7	8.61	-1.78638	Down	0.808488	-	GO:0009536//plastid	-	GO:0017004//cytochrome complex assembly	gi|685277080|ref|XP_009129489.1|/4.18935e-143/PREDICTED: uncharacterized protein LOC103854303 [Brassica rapa]	AT3G26710.1 cofactor assembly of complex C
Bra021037	714	460.685	133.215	-1.79002	Down	0.856751	-	GO:0009536//plastid	-	-	gi|674938189|emb|CDX95217.1|/1.8907e-83/BnaC09g16530D [Brassica napus]	-
Bra028175	936	546.555	157.855	-1.79177	Down	0.857211	K01602|1|9e-17|85.9|ath:AT5G38420|ribulose-bisphosphate carboxylase small chain [EC:4.1.1.39]	-	-	-	gi|674958970|emb|CDX74531.1|/1.95106e-141/BnaA04g08580D [Brassica napus]	AT5G38420.1 Ribulose bisphosphate carboxylase (small chain) family protein
Bra014131	516	239.325	68.92	-1.79598	Down	0.853896	K02881|1|3e-88|321|aly:ARALYDRAFT_473970|large subunit ribosomal protein L18	GO:0030529//ribonucleoprotein complex	GO:0005198//structural molecule activity	GO:0010467//gene expression	gi|685341296|ref|XP_009107364.1|/1.18698e-96/PREDICTED: 50S ribosomal protein L18, chloroplastic [Brassica rapa]	AT1G48350.1 Ribosomal L18p/L5e family protein
Bra016810	1230	375.8	108.1	-1.7976	Down	0.856275	K00605|1|0.0|803|aly:ARALYDRAFT_471331|aminomethyltransferase [EC:2.1.2.10]	GO:0005840//ribosome;GO:0009526//plastid envelope;GO:0005576//extracellular region	GO:0016769//transferase activity, transferring nitrogenous groups;GO:0008168//methyltransferase activity	GO:0010038//response to metal ion;GO:0006544//glycine metabolic process	gi|685350355|ref|XP_009110691.1|/0/PREDICTED: aminomethyltransferase, mitochondrial-like [Brassica rapa]	AT1G11860.3 Glycine cleavage T-protein family
Bra039499	894	34.775	9.99	-1.79949	Down	0.816644	K05857|1|1e-20|98.6|rcu:RCOM_0612550|phosphatidylinositol phospholipase C, delta [EC:3.1.4.11]	-	GO:0016787//hydrolase activity	-	gi|685307886|ref|XP_009144660.1|/1.19667e-173/PREDICTED: phosphoinositide phospholipase C 8-like isoform X2 [Brassica rapa]	AT3G47290.1 phosphatidylinositol-speciwc phospholipase C8
Bra040433	1152	704.72	201.755	-1.80445	Down	0.858212	-	GO:0009526//plastid envelope;GO:0009570//chloroplast stroma;GO:0005576//extracellular region	GO:0048037//cofactor binding;GO:0008187//poly-pyrimidine tract binding	GO:0042254//ribosome biogenesis;GO:0008152//metabolic process	gi|685295540|ref|XP_009138636.1|/0/PREDICTED: chloroplast stem-loop binding protein of 41 kDa a, chloroplastic [Brassica rapa]	AT3G63140.1 chloroplast stem-loop binding protein of 41 kDa
Bra010774	393	1551.81	443.715	-1.80624	Down	0.86023	K02698|1|1e-57|218|ath:AT1G30380|photosystem I subunit X	GO:0009521;GO:0009534//chloroplast thylakoid	-	GO:0044237//cellular metabolic process	gi|688953379|ref|NP_001288887.1|/1.58583e-58/photosystem I reaction center subunit psaK, chloroplastic [Brassica rapa]	AT1G30380.1 photosystem I subunit K
Bra001158	783	25	7.13	-1.80995	Down	0.801234	-	GO:0009532//plastid stroma	-	-	gi|685287782|ref|XP_009134837.1|/1.27127e-153/PREDICTED: TPR repeat-containing thioredoxin TTL1 [Brassica rapa]	AT3G05625.1 Tetratricopeptide repeat (TPR)-like superfamily protein
Bra029602	492	50.995	14.51	-1.81331	Down	0.832037	-	-	-	-	gi|685313110|ref|XP_009147133.1|/2.08216e-10/PREDICTED: formin-A-like [Brassica rapa]	AT3G06750.1 hydroxyproline-rich glycoprotein family protein
Bra013859	384	381.79	108.42	-1.81615	Down	0.858392	K03955|1|6e-07|50.4|pop:POPTR_742720|NADH dehydrogenase (ubiquinone) 1 alpha/beta subcomplex 1 [EC:1.6.5.3 1.6.99.3]	GO:0009526//plastid envelope;GO:0009532//plastid stroma	GO:0019842//vitamin binding;GO:0022892	GO:0009314//response to radiation;GO:0006631//fatty acid metabolic process	gi|674898652|emb|CDY34337.1|/1.67218e-54/BnaA01g14400D [Brassica napus]	AT4G25050.1 acyl carrier protein 4
Bra000848	867	56.795	16.1	-1.8187	Down	0.836435	K06892|1|5e-22|102|pop:POPTR_550478|;K05282|2|1e-16|85.1|vvi:100232996|gibberellin 20-oxidase [EC:1.14.11.12]	GO:0044464	-	GO:0008152//metabolic process	gi|674936105|emb|CDX97295.1|/1.31656e-143/BnaA02g20860D [Brassica napus]	AT4G03070.1 2-oxoglutarate (2OG) and Fe(II)-dependent oxygenase superfamily protein
Bra030389	261	56.355	15.97	-1.81918	Down	0.836123	-	-	-	-	gi|685308327|ref|XP_009144853.1|/3.28513e-15/PREDICTED: uncharacterized protein LOC103868510 [Brassica rapa]	AT1G52342.1 unknown protein; FUNCTIONS IN: molecular_function unknown; INVOLVED IN: biological_process unknown; LOCATED IN: cellular_component unknown; Has 30201 Blast hits to 17322 proteins in 780 species: Archae - 12; Bacteria - 1396; Metazoa - 17338; Fungi - 3422; Plants - 5037; Viruses - 0; Other Eukaryotes - 2996 (source: NCBI BLink).
Bra023644	321	29.395	8.33	-1.81918	Down	0.810801	-	GO:0009536//plastid	-	-	gi|685270389|ref|XP_009126215.1|/4.6802e-42/PREDICTED: 50S ribosomal protein 6, chloroplastic-like [Brassica rapa]	AT5G17870.1 plastid-specific 50S ribosomal protein 6
Bra019210	912	174.3	49.265	-1.82294	Down	0.853469	K11294|1|2e-39|160|smo:SELMODRAFT_15428|nucleolin;K14411|4|2e-21|100|cme:CMR392C|RNA-binding protein Musashi	GO:0009526//plastid envelope;GO:0009532//plastid stroma;GO:0009534//chloroplast thylakoid	GO:0008187//poly-pyrimidine tract binding	GO:0006952//defense response;GO:0010467//gene expression;GO:0016070//RNA metabolic process	gi|685293113|ref|XP_009137471.1|/2.43306e-120/PREDICTED: 31 kDa ribonucleoprotein, chloroplastic-like [Brassica rapa]	AT4G24770.1 31-kDa RNA binding protein
Bra007603	861	353.44	99.205	-1.83298	Down	0.859164	K09872|1|7e-156|547|aly:ARALYDRAFT_912203|aquaporin PIP	GO:0031225//anchored component of membrane;GO:0009536//plastid	GO:0005372//water transmembrane transporter activity	GO:0006970//response to osmotic stress;GO:0042044//fluid transport	gi|685365365|ref|XP_009116806.1|/2.90179e-165/PREDICTED: aquaporin PIP1-1 isoform X1 [Brassica rapa]	AT2G45960.1 plasma membrane intrinsic protein 1B
Bra001747	1764	46.895	13.135	-1.83602	Down	0.832628	K00058|1|0.0|1015|aly:ARALYDRAFT_479462|D-3-phosphoglycerate dehydrogenase [EC:1.1.1.95]	GO:0009536//plastid	GO:0031406//carboxylic acid binding;GO:0016616//oxidoreductase activity, acting on the CH-OH group of donors, NAD or NADP as acceptor;GO:0000166//nucleotide binding	GO:0006563//L-serine metabolic process	gi|685289382|ref|XP_009135634.1|/0/PREDICTED: D-3-phosphoglycerate dehydrogenase 2, chloroplastic [Brassica rapa]	AT3G19480.1 D-3-phosphoglycerate dehydrogenase
Bra003476	1458	67.175	18.79	-1.83796	Down	0.842408	K00924|1|2e-23|108|ath:AT5G22850|[EC:2.7.1.-]	GO:0005618//cell wall	GO:0004175//endopeptidase activity	GO:0019538//protein metabolic process;GO:0009628//response to abiotic stimulus	gi|685333468|ref|XP_009104352.1|/0/PREDICTED: protein ASPARTIC PROTEASE IN GUARD CELL 1 [Brassica rapa]	AT3G61820.1 Eukaryotic aspartyl protease family protein
Bra017276	627	116.16	32.385	-1.84272	Down	0.85127	K08488|1|1e-07|54.7|ath:AT1G32270|syntaxin 7	-	-	-	gi|674892326|emb|CDY40419.1|/4.6855e-104/BnaA04g20980D [Brassica napus]	AT2G35960.1 NDR1/HIN1-like 12
Bra039227	444	388.31	108.24	-1.84298	Down	0.860526	-	GO:0030529//ribonucleoprotein complex;GO:0009536//plastid	GO:0005198//structural molecule activity	GO:0010467//gene expression	gi|674898158|emb|CDY34801.1|/9.73658e-66/BnaA09g41680D [Brassica napus]	AT2G24090.1 Ribosomal protein L35
Bra006838	1599	54.925	15.235	-1.85007	Down	0.838339	K06444|1|0.0|898|ath:AT5G57030|lycopene epsilon-cyclase [EC:5.5.1.18]	-	GO:0009975//cyclase activity;GO:0016491//oxidoreductase activity	GO:0016117//carotenoid biosynthetic process;GO:0006091//generation of precursor metabolites and energy	gi|685282484|ref|XP_009132155.1|/0/PREDICTED: lycopene epsilon cyclase, chloroplastic [Brassica rapa]	AT5G57030.1 Lycopene beta/epsilon cyclase protein
Bra040737	213	71.44	19.795	-1.8516	Down	0.844706	-	GO:0044464;GO:0044421	GO:0005102//receptor binding	GO:0048869//cellular developmental process;GO:0008283//cell proliferation	gi|674863481|emb|CDY68527.1|/2.22678e-34/BnaAnng27590D [Brassica napus]	AT4G16515.1 Encodes a root meristem growth factor (RGF). Belongs to a family of functionally redundant homologous peptides that are secreted, tyrosine-sulfated, and expressed mainly in the stem cell area and the innermost layer of central columella cells. RGFs are required for maintenance of the root stem cell niche and transit amplifying cell proliferation. Members of this family include: At5g60…
Bra017524	903	137.9	38.17	-1.85311	Down	0.853929	K15109|1|1e-155|546|ath:AT5G46800|solute carrier family 25 (mitochondrial carnitine/acylcarnitine transporter), member 20/29	GO:0019866//organelle inner membrane;GO:0031224//intrinsic component of membrane;GO:0009536//plastid	-	GO:0046907//intracellular transport;GO:0006865//amino acid transport	gi|674897765|emb|CDY35182.1|/1.63586e-163/BnaA09g18190D [Brassica napus]	AT5G46800.1 Mitochondrial substrate carrier family protein
Bra027203	1125	383.195	105.59	-1.85961	Down	0.861871	K00507|1|1e-168|590|aly:ARALYDRAFT_479040|stearoyl-CoA desaturase (delta-9 desaturase) [EC:1.14.19.1]	GO:0031224//intrinsic component of membrane;GO:0044424	GO:0016705//oxidoreductase activity, acting on paired donors, with incorporation or reduction of molecular oxygen	GO:0006633//fatty acid biosynthetic process;GO:0009767//photosynthetic electron transport chain	gi|685311239|ref|XP_009146193.1|/0/PREDICTED: palmitoyl-monogalactosyldiacylglycerol delta-7 desaturase, chloroplastic [Brassica rapa]	AT3G15850.1 fatty acid desaturase 5
Bra001460	1119	47.505	13.025	-1.8668	Down	0.835221	K13420|1|6e-38|156|rcu:RCOM_0633880|LRR receptor-like serine/threonine-protein kinase FLS2 [EC:2.7.11.1]	GO:0009536//plastid	GO:0005488//binding	GO:0009411//response to UV;GO:0042221//response to chemical	gi|685288574|ref|XP_009135241.1|/0/PREDICTED: DNA-damage-repair/toleration protein DRT100 [Brassica rapa]	AT3G12610.1 Leucine-rich repeat (LRR) family protein
Bra005641	1308	93.89	25.735	-1.86724	Down	0.850203	K13691|1|3e-104|376|vvi:100242294|pathogen-inducible salicylic acid glucosyltransferase [EC:2.4.1.-]	-	GO:0035251//UDP-glucosyltransferase activity	GO:0042538//hyperosmotic salinity response;GO:0009414//response to water deprivation;GO:0009653//anatomical structure morphogenesis;GO:0009737//response to abscisic acid;GO:0034614//cellular response to reactive oxygen species;GO:0009850//auxin metabolic process	gi|674890649|emb|CDY42069.1|/0/BnaA05g11170D [Brassica napus]	AT2G31790.1 UDP-Glycosyltransferase superfamily protein
Bra019797	1200	2464.08	674.48	-1.8692	Down	0.865777	K05298|1|0.0|706|aly:ARALYDRAFT_471443|glyceraldehyde-3-phosphate dehydrogenase (NADP+) (phosphorylating) [EC:1.2.1.13]	GO:0009532//plastid stroma;GO:0009526//plastid envelope;GO:0009534//chloroplast thylakoid;GO:0005576//extracellular region	GO:0016620//oxidoreductase activity, acting on the aldehyde or oxo group of donors, NAD or NADP as acceptor;GO:0000166//nucleotide binding	GO:0009314//response to radiation;GO:0006007//glucose catabolic process;GO:0015977//carbon fixation;GO:0034285;GO:0006950//response to stress	gi|685315871|ref|XP_009148556.1|/0/PREDICTED: glyceraldehyde-3-phosphate dehydrogenase GAPA2, chloroplastic isoform X1 [Brassica rapa]	AT1G12900.1 glyceraldehyde 3-phosphate dehydrogenase A subunit 2
Bra005984	705	26.27	7.185	-1.87036	Down	0.809472	-	GO:0043231//intracellular membrane-bounded organelle	GO:0005488//binding;GO:0001071//nucleic acid binding transcription factor activity	GO:0007623//circadian rhythm;GO:0043392//negative regulation of DNA binding;GO:0010467//gene expression	gi|685280295|ref|XP_009131055.1|/1.58812e-72/PREDICTED: transcription factor TCP21 [Brassica rapa]	AT5G08330.1 TCP family transcription factor
Bra023713	1551	32.75	8.945	-1.87234	Down	0.820796	K00975|1|0.0|968|ath:AT5G19220|glucose-1-phosphate adenylyltransferase [EC:2.7.7.27]	GO:0009526//plastid envelope;GO:0009532//plastid stroma	GO:0070566//adenylyltransferase activity	GO:0005977//glycogen metabolic process	gi|685270580|ref|XP_009126310.1|/0/PREDICTED: glucose-1-phosphate adenylyltransferase large subunit 1, chloroplastic-like [Brassica rapa]	AT5G19220.1 ADP glucose pyrophosphorylase large subunit 1
Bra003236	525	521.06	142.215	-1.87338	Down	0.86343	-	-	-	-	gi|685332571|ref|XP_009103995.1|/3.64832e-79/PREDICTED: uncharacterized protein LOC103830048 [Brassica rapa]	AT3G56290.1 unknown protein; Has 39 Blast hits to 39 proteins in 15 species: Archae - 0; Bacteria - 0; Metazoa - 0; Fungi - 0; Plants - 39; Viruses - 0; Other Eukaryotes - 0 (source: NCBI BLink).
Bra033713	813	26.515	7.23	-1.87474	Down	0.809981	K02866|1|8e-19|92.0|osa:4332737|large subunit ribosomal protein L10e	GO:0005618//cell wall;GO:0031090//organelle membrane;GO:0009536//plastid	GO:0016791//phosphatase activity	-	gi|685326741|ref|XP_009101743.1|/7.00331e-160/PREDICTED: acid phosphatase 1 [Brassica rapa]	AT5G44020.1 HAD superfamily, subfamily IIIB acid phosphatase
Bra010807	804	6253.89	1688.8	-1.88876	Down	0.866663	K08912|1|2e-147|519|ath:AT1G29920|light-harvesting complex II chlorophyll a/b binding protein 1	GO:0031224//intrinsic component of membrane;GO:0009521;GO:0009534//chloroplast thylakoid;GO:0009570//chloroplast stroma;GO:0005576//extracellular region	GO:0043169//cation binding;GO:0046906//tetrapyrrole binding	GO:0009746;GO:0006091//generation of precursor metabolites and energy;GO:0009639//response to red or far red light;GO:0006464//cellular protein modification process	gi|685347502|ref|XP_009109634.1|/3.7369e-152/PREDICTED: chlorophyll a-b binding protein 2, chloroplastic-like [Brassica rapa]	AT1G29920.1 chlorophyll A/B-binding protein 2
Bra036946	882	26.56	7.15	-1.89324	Down	0.810719	K14664|1|3e-137|485|ath:AT1G44350|IAA-amino acid hydrolase [EC:3.5.1.-]	GO:0044464	GO:0016811//hydrolase activity, acting on carbon-nitrogen (but not peptide) bonds, in linear amides;GO:0070011//peptidase activity, acting on L-amino acid peptides	GO:0042445//hormone metabolic process;GO:0002831	gi|688953012|ref|NP_001288853.1|/8.20746e-154/IAA-amino acid hydrolase ILR1-like 6 [Brassica rapa]	AT1G44350.1 IAA-leucine resistant (ILR)-like gene 6
Bra017916	741	72.745	19.545	-1.89605	Down	0.846971	K15382|1|1e-122|437|aly:ARALYDRAFT_889605|solute carrier family 50 (sugar transporter)	GO:0016021//integral component of membrane	GO:0015144//carbohydrate transmembrane transporter activity	GO:0071702	gi|685318555|ref|XP_009149662.1|/1.1201e-130/PREDICTED: bidirectional sugar transporter SWEET1 [Brassica rapa]	AT1G21460.1 Nodulin MtN3 family protein
Bra033859	1542	173.435	46.315	-1.90484	Down	0.858392	-	GO:0009526//plastid envelope	-	-	gi|685309178|ref|XP_009145211.1|/0/PREDICTED: plastidal glycolate/glycerate translocator 1, chloroplastic [Brassica rapa]	AT1G32080.1 membrane protein, putative
Bra037993	180	121.375	32.37	-1.90674	Down	0.854946	-	-	-	-	gi|674908974|emb|CDY24040.1|/3.99324e-06/BnaA06g00380D [Brassica napus]	AT1G55330.1 arabinogalactan protein 21
Bra022369	1932	39.865	10.63	-1.90698	Down	0.830363	-	-	-	-	gi|685310485|ref|XP_009145844.1|/0/PREDICTED: protein TIC 62, chloroplastic [Brassica rapa]	AT3G18890.1 NAD(P)-binding Rossmann-fold superfamily protein
Bra021593	600	179.005	47.71	-1.90764	Down	0.859049	K02968|1|4e-52|202|aly:ARALYDRAFT_897793|small subunit ribosomal protein S20	GO:0009532//plastid stroma;GO:0030529//ribonucleoprotein complex	-	GO:0009987//cellular process	gi|674912986|emb|CDY20104.1|/1.17801e-72/BnaA01g28980D [Brassica napus]	AT3G15190.1 chloroplast 30S ribosomal protein S20, putative
[truncated: 230 more rows]
